# Supplementary material for: Protein Biocargo and Anti-Inflammatory Effect of Tomato Fruit-Derived Nanovesicles Separated by Density Gradient Ultracentrifugation and Loaded with Curcumin
Source: MDPI journal article supplement (doi:10.3390/pharmaceutics15020333), 2023-01-19
Supplement: s1 [file s1]

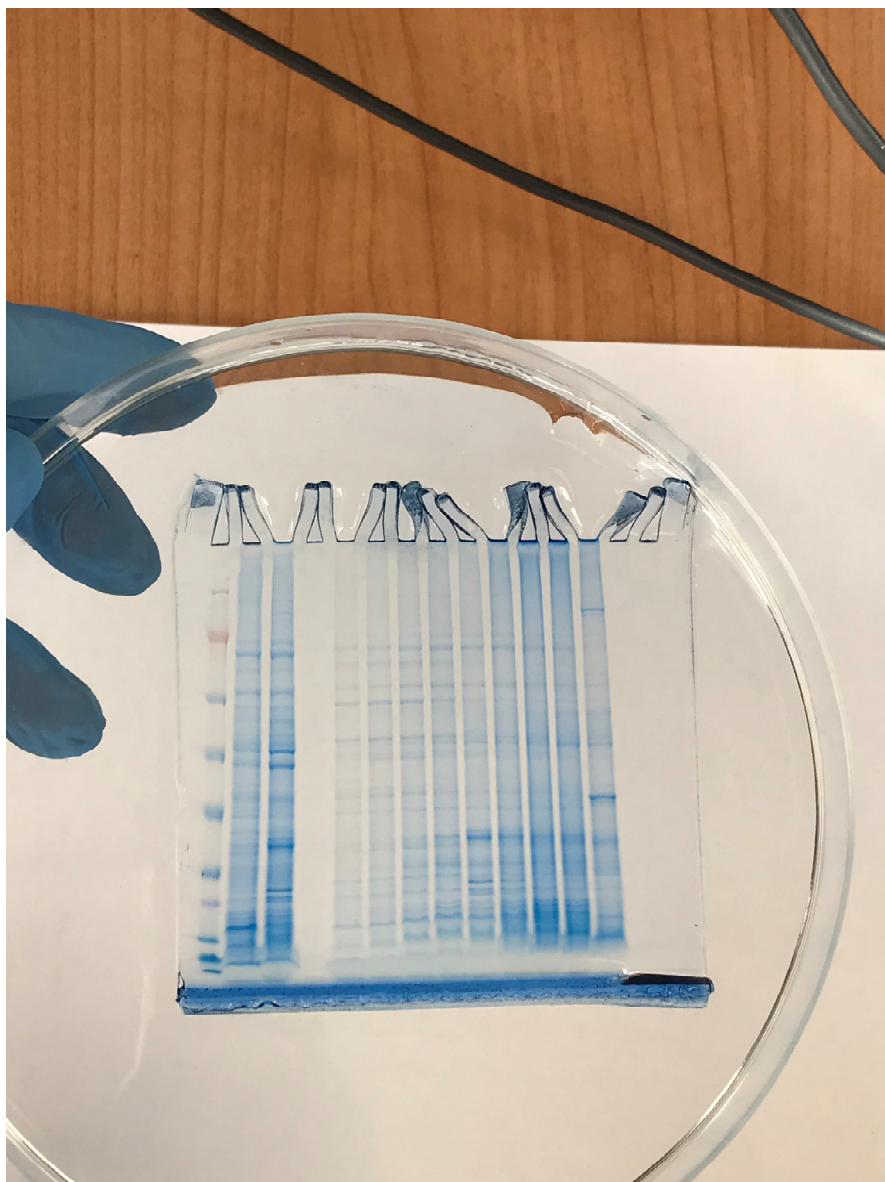

**Figure S1.** Uncropped sodium dodecyl sulfate–polyacrylamide gel electrophoresis (SDS-PAGE) image of Figure 2c. Protein profiles of tomato NVs and fractions separated by iodixanol DGUC (the loaded protein quantity for each fraction was 10  $\mu$ g, except Fraction 1, 11 and 12, for these fractions the protein amount was around 1  $\mu$ g).
