# Supplementary material for: Protein Biocargo and Anti-Inflammatory Effect of Tomato Fruit-Derived Nanovesicles Separated by Density Gradient Ultracentrifugation and Loaded with Curcumin
Source: Pharmaceutics. 2023 Jan 19;15(2):333. doi: 10.3390/pharmaceutics15020333 (PMC9961453; doi:10.3390/pharmaceutics15020333)
Supplement: Supplementary file 1 [file pharmaceutics-15-00333-s001.zip › Supplementary Table S1. Proteomics results.xlsx]

## Sheet: A) NVs
N	Entry	Accession	Cluster ID in UniRef	Cluster Name	Types	Size	Organisms		Description Blast OmicsBox	Mw (Da)	PLGS Score	Peptides	Theoretical Peptides	Coverage (%)	Precursor RMS Mass Error (ppm)	Products	Products RMS Mass Error (ppm)		Tags	SeqName	Description UniProt	Length	#Hits	e-Value	sim mean	#GO	GO IDs	GO Names	Enzyme Codes	Enzyme Names
1	Q42873_SOLLC	Q42873	UniRef90_P38416	Cluster: Linoleate 9S-lipoxygenase B	UniProtKB Reviewed (Swiss-Prot); UniProtKB Unreviewed (TrEMBL)	4	Solanum lycopersicum (Tomato); Solanum chilense (Tomato)		putative linoleate 9S-lipoxygenase 5	97075	23338	49	87	57.6251	9.6025	1226	22.9711	true	[BLASTED, MAPPED, ANNOTATED]	tr|Q42873|Q42873_SOLLC	Lipoxygenase OS=Solanum lycopersicum OX=4081 GN=LOX PE=2 SV=1	859	20	0	90.27	6	P:GO:0006633; P:GO:0031408; P:GO:0034440; F:GO:0046872; F:GO:1990136; C:GO:0005737	P:fatty acid biosynthetic process; P:oxylipin biosynthetic process; P:lipid oxidation; F:metal ion binding; F:linoleate 9S-lipoxygenase activity; C:cytoplasm	EC:1.13.11.58	Linoleate 9S-lipoxygenase
2	B0JEU3_SOLLC	B0JEU3	UniRef90_A0A6N2BP58	Cluster: Vicilin GC72-A	UniProtKB Unreviewed (TrEMBL); UniParc	8	Solanum chilense (Tomato); Solanum lycopersicum (Tomato); Solanum tuberosum (Potato); Solanum pennellii; Solanum verrucosum; Solanum stenotomum		vicilin-like antimicrobial peptides 2-3	66137	73859.3	35	62	54.6573	5.3437	876	19.8844	true	[BLASTED]	tr|B0JEU3|B0JEU3_SOLLC	Vicilin OS=Solanum lycopersicum OX=4081 GN=vicilin PE=1 SV=1	569	20	0	87.09
3	A0A3Q7I6G7_SOLLC	A0A3Q7I6G7	UniRef90_A0A3Q7I6G7	Cluster: Cupin type-1 domain-containing protein	UniProtKB Unreviewed (TrEMBL)	1	Solanum lycopersicum (Tomato)		vicilin GC72-A-like	98813	69583.1	31	81	38.5598	6.6731	849	21.9304	true	[BLASTED]	tr|A0A3Q7I6G7|A0A3Q7I6G7_SOLLC	Uncharacterized protein OS=Solanum lycopersicum OX=4081 PE=4 SV=1	861	20	0	82.13
4	A0A3Q7IWI5_SOLLC	A0A3Q7IWI5	UniRef90_A0A3Q7IWI5	Cluster: 11S globulin	UniProtKB Unreviewed (TrEMBL); UniParc	8	Solanum lycopersicum (Tomato); Solanum chilense (Tomato); Solanum tuberosum (Potato); Solanum stenotomum; Solanum verrucosum; Solanum pennellii		legumin A-like	53306	27885.9	31	35	69.8312	2.2511	932	23.5467	true	[BLASTED, MAPPED, ANNOTATED]	tr|A0A3Q7IWI5|A0A3Q7IWI5_SOLLC	Uncharacterized protein OS=Solanum lycopersicum OX=4081 GN=101258989 PE=3 SV=1	474	20	0	92.41	1	F:GO:0045735	F:nutrient reservoir activity
5	A0A3Q7I4W4_SOLLC	A0A3Q7I4W4	UniRef90_A0A3Q7I4W4	Cluster: 11S globulin seed storage protein 2-like	UniProtKB Unreviewed (TrEMBL); UniParc	8	Solanum lycopersicum (Tomato); Solanum tuberosum (Potato); Solanum chilense (Tomato); Solanum verrucosum; Solanum pennellii; Solanum stenotomum		11S globulin seed storage protein 2-like	54431	20868.2	25	38	59.8753	1.1361	642	25.6622	true	[BLASTED, MAPPED, ANNOTATED]	tr|A0A3Q7I4W4|A0A3Q7I4W4_SOLLC	Uncharacterized protein OS=Solanum lycopersicum OX=4081 GN=101252924 PE=3 SV=1	481	20	0	90.29	1	F:GO:0045735	F:nutrient reservoir activity
6	Q84XW6_SOLLC	Q84XW6	UniRef90_M1CTC4	Cluster: V-type proton ATPase catalytic subunit A	UniProtKB Unreviewed (TrEMBL); UniParc	28	Solanum tuberosum (Potato); Malus baccata (Siberian crab apple); Rhaphiolepis bibas; Cicer arietinum (Chickpea); Medicago truncatula (Barrel medic); Trifolium pratense (Red clover); Trifolium medium; Cucurbita maxima (Pumpkin); Rhododendron simsii (Sims's rhododendron); Cannabis sativa (Hemp); Capsicum annuum (Capsicum pepper); Cucurbita moschata (Winter crookneck squash); Solanum chilense (Tomat…		V-type proton ATPase catalytic subunit A	68526	18733.1	24	64	44.7833	1.9357	500	26.8985	true	[BLASTED, MAPPED, ANNOTATED]	tr|Q84XW6|Q84XW6_SOLLC	V-ATPase 69 kDa subunit OS=Solanum lycopersicum OX=4081 PE=2 SV=1	623	20	0	98.78	7	P:GO:0015986; F:GO:0005524; F:GO:0046933; F:GO:0046961; C:GO:0000325; C:GO:0009507; C:GO:0033180	P:ATP synthesis coupled proton transport; F:ATP binding; F:proton-transporting ATP synthase activity, rotational mechanism; F:proton-transporting ATPase activity, rotational mechanism; C:plant-type vacuole; C:chloroplast; C:proton-transporting V-type ATPase, V1 domain	EC:7.1.3.1; EC:7.1.2.2; EC:6	H(+)-exporting diphosphatase; H(+)-transporting two-sector ATPase; Ligases
7	A0A3Q7GTE7_SOLLC	A0A3Q7GTE7	UniRef90_A0A1U8H482	Cluster: alcohol dehydrogenase 1	UniProtKB Unreviewed (TrEMBL)	11	Capsicum annuum (Capsicum pepper); Solanum lycopersicum (Tomato); Solanum pimpinellifolium (Currant tomato); Solanum lycopersicum var. cerasiforme; Solanum pennellii (Tomato); Solanum peruvianum (Peruvian tomato); Solanum cheesmaniae (Galapagos Island tomato); Capsicum chinense (Scotch bonnet); Nicotiana tabacum (Common tobacco)		alcohol dehydrogenase 1	41275	21142.3	20	30	49.7382	1.3545	446	23.2101	true	[BLASTED, MAPPED, ANNOTATED]	tr|A0A3Q7GTE7|A0A3Q7GTE7_SOLLC	Uncharacterized protein OS=Solanum lycopersicum OX=4081 PE=3 SV=1	382	20	0	97.13	6	P:GO:0046294; F:GO:0003979; F:GO:0004024; F:GO:0008270; F:GO:0051903; C:GO:0005829	P:formaldehyde catabolic process; F:UDP-glucose 6-dehydrogenase activity; F:alcohol dehydrogenase activity, zinc-dependent; F:zinc ion binding; F:S-(hydroxymethyl)glutathione dehydrogenase activity; C:cytosol	EC:1.1.1.22; EC:1.1.1.284; EC:1.1.1.1; EC:1.1.1.71	UDP-glucose 6-dehydrogenase; S-(hydroxymethyl)glutathione dehydrogenase; Alcohol dehydrogenase; Alcohol dehydrogenase (NAD(P)(+))
8	A0A3Q7I9U4_SOLLC	A0A3Q7I9U4	UniRef90_P32112	Cluster: Adenosylhomocysteinase	UniProtKB Reviewed (Swiss-Prot); UniProtKB Unreviewed (TrEMBL); UniParc	305	Triticum aestivum (Wheat); Nicotiana sylvestris (Wood tobacco); Nicotiana tabacum (Common tobacco); Arabidopsis thaliana (Mouse-ear cress); Catharanthus roseus (Madagascar periwinkle); Mesembryanthemum crystallinum (Common ice plant); Solanum lycopersicum (Tomato); Erythranthe guttata (Yellow monkey flower); Chenopodium quinoa (Quinoa); Aquilegia coerulea (Rocky mountain columbine); Spinacia oler…		adenosylhomocysteinase	53116	16712.5	20	37	48.0412	2.0038	466	21.6585	true	[BLASTED, MAPPED, ANNOTATED]	tr|A0A3Q7I9U4|A0A3Q7I9U4_SOLLC	Adenosylhomocysteinase OS=Solanum lycopersicum OX=4081 GN=544304 PE=3 SV=1	485	20	0	99.03	4	P:GO:0006730; P:GO:0033353; F:GO:0004013; C:GO:0005829	P:one-carbon metabolic process; P:S-adenosylmethionine cycle; F:adenosylhomocysteinase activity; C:cytosol	EC:3.3.1.1	Adenosylhomocysteinase
9	Q8GZD8_SOLLC	Q8GZD8	UniRef90_Q42876	Cluster: Leucine aminopeptidase 2, chloroplastic	UniProtKB Reviewed (Swiss-Prot); UniProtKB Unreviewed (TrEMBL); UniParc	18	Solanum lycopersicum (Tomato); Capsicum annuum (Capsicum pepper); Capsicum baccatum (Peruvian pepper); Solanum chilense (Tomato); Capsicum chinense (Scotch bonnet); Solanum chacoense (Chaco potato); Solanum tuberosum (Potato); Solanum verrucosum; Solanum stenotomum		leucine aminopeptidase 2, chloroplastic	60243	9024.67	20	49	42.8076	1.7553	540	28.5653	true	[BLASTED, MAPPED, ANNOTATED]	tr|Q8GZD8|Q8GZD8_SOLLC	Neutral leucine aminopeptidase preprotein OS=Solanum lycopersicum OX=4081 GN=LapN PE=2 SV=1	577	20	0	94.93	5	P:GO:0006508; F:GO:0000287; F:GO:0030145; F:GO:0070006; C:GO:0009507	P:proteolysis; F:magnesium ion binding; F:manganese ion binding; F:metalloaminopeptidase activity; C:chloroplast	EC:3.4.11	Acting on peptide bonds (peptidases)
10	A0A3Q7GKD7_SOLLC	A0A3Q7GKD7	UniRef90_A0A1S4CM79	Cluster: Malic enzyme	UniProtKB Unreviewed (TrEMBL); UniParc	23	Nicotiana tabacum (Common tobacco); Nicotiana sylvestris (Wood tobacco); Cuscuta campestris; Nicotiana attenuata (Coyote tobacco); Solanum chacoense (Chaco potato); Solanum tuberosum (Potato); Solanum lycopersicum (Tomato); Solanum habrochaites (Wild tomato); Solanum chilense (Tomato); Capsicum chinense (Scotch bonnet); Capsicum annuum (Capsicum pepper); Capsicum baccatum (Peruvian pepper); Ipomo…		NADP-dependent malic enzyme	64071	25638.3	19	52	47.1503	5.1589	484	27.8153	true	[BLASTED, MAPPED, ANNOTATED]	tr|A0A3Q7GKD7|A0A3Q7GKD7_SOLLC	Malic enzyme OS=Solanum lycopersicum OX=4081 GN=543522 PE=3 SV=1	579	20	0	96.61	7	P:GO:0006090; P:GO:0006108; F:GO:0004471; F:GO:0004473; F:GO:0046872; F:GO:0051287; C:GO:0009507	P:pyruvate metabolic process; P:malate metabolic process; F:malate dehydrogenase (decarboxylating) (NAD+) activity; F:malate dehydrogenase (decarboxylating) (NADP+) activity; F:metal ion binding; F:NAD binding; C:chloroplast	EC:1.1.1.38; EC:1.1.1.39; EC:1.1.1.40	Malate dehydrogenase (oxaloacetate-decarboxylating); Malate dehydrogenase (decarboxylating); Malate dehydrogenase (oxaloacetate-decarboxylating) (NADP(+))
11	A0A290WKX1_SOLLC	A0A290WKX1	UniRef90_P18260	Cluster: ATP synthase subunit alpha, mitochondrial	UniProtKB Reviewed (Swiss-Prot); UniProtKB Unreviewed (TrEMBL); UniParc	230	Helianthus annuus (Common sunflower); Nicotiana plumbaginifolia (Leadwort-leaved tobacco); Helianthus grosseserratus (Sawtooth sunflower); Helianthus strumosus; Viviania marifolia; Daucus carota (Wild carrot); Daucus carota subsp. carota; Coriandrum sativum (Coriander); Apium leptophyllum; Solanum bukasovii; Spondias mombin (Yellow mombin); Spondias tuberosa; Staphylea trifolia (American bladdern…		ATP synthase subunit 1	55414	19652.1	19	46	41.2916	1.0087	393	27.1611	true	[BLASTED, MAPPED, ANNOTATED]	tr|A0A290WKX1|A0A290WKX1_SOLLC	ATP synthase subunit alpha OS=Solanum lycopersicum OX=4081 GN=atp1 PE=3 SV=1	511	20	0	99.44	14	P:GO:0006119; P:GO:0015986; P:GO:0022900; F:GO:0004129; F:GO:0005524; F:GO:0020037; F:GO:0043531; F:GO:0046872; F:GO:0046933; C:GO:0005743; C:GO:0009507; C:GO:0016021; C:GO:0045261; C:GO:0070469	P:oxidative phosphorylation; P:ATP synthesis coupled proton transport; P:electron transport chain; F:cytochrome-c oxidase activity; F:ATP binding; F:heme binding; F:ADP binding; F:metal ion binding; F:proton-transporting ATP synthase activity, rotational mechanism; C:mitochondrial inner membrane; C:chloroplast; C:integral component of membrane; C:proton-transporting ATP synthase complex, catalyti…	EC:7.1.2.2; EC:1.9; EC:6; EC:7.1.1.9	H(+)-transporting two-sector ATPase; Acting on a heme group of donors; Ligases; Cytochrome-c oxidase
12	A0A3Q7I7H2_SOLLC	A0A3Q7I7H2	UniRef90_A0A3Q7I7H2	Cluster: 11S globulin	UniProtKB Unreviewed (TrEMBL); UniParc	11	Solanum lycopersicum (Tomato); Solanum tuberosum (Potato); Solanum chilense (Tomato); Solanum verrucosum; Solanum stenotomum; Solanum pennellii		11S globulin subunit beta-like	57962	19264.5	19	35	40.3509	1.1686	637	25.0732	true	[BLASTED, MAPPED, ANNOTATED]	tr|A0A3Q7I7H2|A0A3Q7I7H2_SOLLC	Uncharacterized protein OS=Solanum lycopersicum OX=4081 PE=3 SV=1	513	20	0	86.31	1	F:GO:0045735	F:nutrient reservoir activity
13	K7SGP9_SOLLC	K7SGP9	UniRef90_K7SGP9	Cluster: Carboxylesterase 1	UniProtKB Unreviewed (TrEMBL); UniParc	8	Solanum lycopersicum (Tomato); Solanum galapagense; Solanum cheesmaniae (Galapagos Island tomato); Solanum chmielewskii; Solanum pennellii (Tomato); Solanum habrochaites (Wild tomato); Solanum pimpinellifolium (Currant tomato); Mojavia dolomitestris		carboxylesterase 1	37717	15275	19	38	64.0118	2.537	426	29.1424	true	[BLASTED, MAPPED, ANNOTATED]	tr|K7SGP9|K7SGP9_SOLLC	Carboxylesterase 1 OS=Solanum lycopersicum OX=4081 GN=CXE1 PE=4 SV=1	339	20	0	88.52	1	F:GO:0016787	F:hydrolase activity	EC:3	Hydrolases
14	A0A3Q7I6C6_SOLLC	A0A3Q7I6C6	UniRef90_A0A3Q7I6C6	Cluster: Cytochrome P450	UniProtKB Unreviewed (TrEMBL); UniParc	7	Solanum lycopersicum (Tomato); Solanum tuberosum (Potato); Solanum chilense (Tomato); Solanum pennellii; Solanum stenotomum; Solanum verrucosum		cytochrome P450 94A2-like	58111	9200.94	19	50	45.0199	3.56	409	24.3471	true	[BLASTED, MAPPED, ANNOTATED]	tr|A0A3Q7I6C6|A0A3Q7I6C6_SOLLC	Uncharacterized protein OS=Solanum lycopersicum OX=4081 GN=101249297 PE=3 SV=1	502	20	0	92.56	5	F:GO:0004497; F:GO:0005506; F:GO:0016705; F:GO:0020037; C:GO:0016021	F:monooxygenase activity; F:iron ion binding; F:oxidoreductase activity, acting on paired donors, with incorporation or reduction of molecular oxygen; F:heme binding; C:integral component of membrane	EC:1.14	Acting on paired donors, with incorporation or reduction of molecular oxygen. The oxygen incorporated need not be derived from O(2)
15	A0A3Q7FX57_SOLLC	A0A3Q7FX57	UniRef90_A0A3Q7FX57	Cluster: Heat shock cognate 70 kDa protein	UniProtKB Unreviewed (TrEMBL); UniParc	28	Solanum lycopersicum (Tomato); Solanum chilense (Tomato); Olea europaea subsp. europaea; Corchorus olitorius; Solanum tuberosum (Potato); Eucalyptus grandis (Flooded gum); Sesamum indicum (Oriental sesame); Brassica oleracea var. oleracea; Brassica cretica (Mustard); Capsicum chinense (Scotch bonnet); Capsicum annuum (Capsicum pepper); Cyprinus carpio (Common carp); Solanum stenotomum; Solanum ve…		heat shock cognate 70 kDa protein 2-like	85456	24222.6	18	62	32.0203	1.982	511	30.3669	true	[BLASTED, MAPPED, ANNOTATED]	tr|A0A3Q7FX57|A0A3Q7FX57_SOLLC	Uncharacterized protein OS=Solanum lycopersicum OX=4081 PE=3 SV=1	787	20	0	98.49	9	P:GO:0034620; P:GO:0042026; P:GO:0051085; F:GO:0005524; F:GO:0031072; F:GO:0044183; F:GO:0051082; F:GO:0051787; C:GO:0005788	P:cellular response to unfolded protein; P:protein refolding; P:chaperone cofactor-dependent protein refolding; F:ATP binding; F:heat shock protein binding; F:protein folding chaperone; F:unfolded protein binding; F:misfolded protein binding; C:endoplasmic reticulum lumen
16	A0A3Q7IZ03_SOLLC	A0A3Q7IZ03	UniRef90_A0A3Q7IZ03	Cluster: Heat shock cognate 70 kDa protein	UniProtKB Unreviewed (TrEMBL); UniParc	17	Solanum lycopersicum (Tomato); Abrus precatorius (Indian licorice); Prunus persica (Peach); Prunus armeniaca (Apricot); Prunus dulcis (Almond); Prunus yedoensis var. nudiflora; Solanum chilense (Tomato); Quercus lobata (Valley oak); Solanum tuberosum (Potato); Prunus avium (Cherry); Solanum stenotomum; Eucalyptus grandis; Quercus suber; Solanum verrucosum; Kribbella monticola; Prunus mume		heat shock cognate 70 kDa protein 2-like	71099	23247.6	18	54	39.9076	2.5612	526	33.127	true	[BLASTED, MAPPED, ANNOTATED]	tr|A0A3Q7IZ03|A0A3Q7IZ03_SOLLC	Uncharacterized protein OS=Solanum lycopersicum OX=4081 PE=3 SV=1	649	20	0	98.51	9	P:GO:0034620; P:GO:0042026; P:GO:0051085; F:GO:0005524; F:GO:0031072; F:GO:0044183; F:GO:0051082; F:GO:0051787; C:GO:0005788	P:cellular response to unfolded protein; P:protein refolding; P:chaperone cofactor-dependent protein refolding; F:ATP binding; F:heat shock protein binding; F:protein folding chaperone; F:unfolded protein binding; F:misfolded protein binding; C:endoplasmic reticulum lumen
17	A0A3Q7GD18_SOLLC	A0A3Q7GD18	UniRef90_P43395	Cluster: ATP synthase subunit beta, mitochondrial (Fragment)	UniProtKB Reviewed (Swiss-Prot); UniProtKB Unreviewed (TrEMBL); UniParc	83	Actinidia deliciosa (Kiwi); Actinidia chinensis var. chinensis (Chinese soft-hair kiwi); Olea europaea subsp. europaea; Capsicum annuum (Capsicum pepper); Capsicum baccatum (Peruvian pepper); Cucurbita moschata (Winter crookneck squash); Carpinus fangiana; Cucurbita maxima (Pumpkin); Nelumbo nucifera (Sacred lotus); Cuscuta campestris; Zingiber officinale (Ginger); Cuscuta australis; Solanum lyco…		ATP synthase subunit beta, mitochondrial	59570	14909	18	43	43.8061	20.5521	567	25.6467	true	[BLASTED, MAPPED, ANNOTATED]	tr|A0A3Q7GD18|A0A3Q7GD18_SOLLC	ATP synthase subunit beta OS=Solanum lycopersicum OX=4081 GN=101261919 PE=3 SV=1	557	20	0	98.05	7	P:GO:0042776; F:GO:0005515; F:GO:0005524; F:GO:0046933; F:GO:0046961; C:GO:0000275; C:GO:0009507	P:mitochondrial ATP synthesis coupled proton transport; F:protein binding; F:ATP binding; F:proton-transporting ATP synthase activity, rotational mechanism; F:proton-transporting ATPase activity, rotational mechanism; C:mitochondrial proton-transporting ATP synthase complex, catalytic sector F(1); C:chloroplast	EC:7.1.3.1; EC:7.1.2.2; EC:6	H(+)-exporting diphosphatase; H(+)-transporting two-sector ATPase; Ligases
18	A0A3Q7H3K1_SOLLC	A0A3Q7H3K1	UniRef90_A0A3Q7H3K1	Cluster: MI domain-containing protein	UniProtKB Unreviewed (TrEMBL)	1	Solanum lycopersicum (Tomato)		eukaryotic translation initiation factor isoform 4g-1	154625	19284.4	17	122	17.0576	22.9791	331	37.9279	true	[BLASTED, MAPPED, ANNOTATED]	tr|A0A3Q7H3K1|A0A3Q7H3K1_SOLLC	MI domain-containing protein OS=Solanum lycopersicum OX=4081 PE=4 SV=1	1407	20	0	95.09	5	P:GO:0006413; P:GO:0006417; F:GO:0003729; F:GO:0003743; C:GO:0016281	P:translational initiation; P:regulation of translation; F:mRNA binding; F:translation initiation factor activity; C:eukaryotic translation initiation factor 4F complex
19	A0A3Q7FVP3_SOLLC	A0A3Q7FVP3	UniRef90_P17614	Cluster: ATP synthase subunit beta, mitochondrial	UniProtKB Reviewed (Swiss-Prot); UniProtKB Unreviewed (TrEMBL); UniParc	23	Nicotiana plumbaginifolia (Leadwort-leaved tobacco); Solanum lycopersicum (Tomato); Solanum chilense (Tomato); Solanum chacoense (Chaco potato); Nicotiana sylvestris (Wood tobacco); Nicotiana attenuata (Coyote tobacco); Nicotiana tabacum (Common tobacco); Capsicum baccatum (Peruvian pepper); Capsicum annuum (Capsicum pepper); Capsicum chinense (Scotch bonnet); Cuscuta campestris; Solanum pennelli…		ATP synthase subunit beta, mitochondrial	60999	13489	17	42	40.0697	21.6071	519	25.1942	true	[BLASTED, MAPPED, ANNOTATED]	tr|A0A3Q7FVP3|A0A3Q7FVP3_SOLLC	ATP synthase subunit beta OS=Solanum lycopersicum OX=4081 PE=3 SV=1	574	20	0	95.66	7	P:GO:0042776; F:GO:0005515; F:GO:0005524; F:GO:0046933; F:GO:0046961; C:GO:0000275; C:GO:0009507	P:mitochondrial ATP synthesis coupled proton transport; F:protein binding; F:ATP binding; F:proton-transporting ATP synthase activity, rotational mechanism; F:proton-transporting ATPase activity, rotational mechanism; C:mitochondrial proton-transporting ATP synthase complex, catalytic sector F(1); C:chloroplast	EC:7.1.3.1; EC:7.1.2.2; EC:6	H(+)-exporting diphosphatase; H(+)-transporting two-sector ATPase; Ligases
20	A0A3Q7FJI3_SOLLC	A0A3Q7FJI3	UniRef90_A0A3Q7FJI3	Cluster: Fe2OG dioxygenase domain-containing protein	UniProtKB Unreviewed (TrEMBL); UniParc	7	Solanum lycopersicum (Tomato); Solanum lycopersicum var. cerasiforme; Solanum chilense (Tomato); Solanum pennellii		probable 2-oxoglutarate-dependent dioxygenase AOP1	36506	29174.6	16	22	70.0935	1.0445	527	27.4415	true	[BLASTED, MAPPED, ANNOTATED]	tr|A0A3Q7FJI3|A0A3Q7FJI3_SOLLC	Fe2OG dioxygenase domain-containing protein OS=Solanum lycopersicum OX=4081 GN=104644281 PE=3 SV=1	321	20	0	89.76	3	F:GO:0031418; F:GO:0046872; F:GO:0051213	F:L-ascorbic acid binding; F:metal ion binding; F:dioxygenase activity	EC:1	Oxidoreductases
21	A0A3Q7IYI9_SOLLC	A0A3Q7IYI9	UniRef90_A0A1S4CVP2	Cluster: heat shock cognate 70 kDa protein-like	UniProtKB Unreviewed (TrEMBL); UniParc	35	Nicotiana tabacum (Common tobacco); Solanum lycopersicum (Tomato); Solanum chilense (Tomato); Solanum tuberosum (Potato); Vitis vinifera (Grape); Nicotiana sylvestris (Wood tobacco); Nicotiana attenuata (Coyote tobacco); Capsicum annuum (Capsicum pepper); Capsicum baccatum (Peruvian pepper); Solanum chacoense (Chaco potato); Capsicum chinense (Scotch bonnet); Phoenix dactylifera (Date palm); Sola…		heat shock cognate 70 kDa protein	71414	23108.9	16	56	37.156	2.0918	416	29.215	true	[BLASTED, MAPPED, ANNOTATED]	tr|A0A3Q7IYI9|A0A3Q7IYI9_SOLLC	Uncharacterized protein OS=Solanum lycopersicum OX=4081 GN=101255164 PE=3 SV=1	654	20	0	98.57	9	P:GO:0034620; P:GO:0042026; P:GO:0051085; F:GO:0005524; F:GO:0031072; F:GO:0044183; F:GO:0051082; F:GO:0051787; C:GO:0005788	P:cellular response to unfolded protein; P:protein refolding; P:chaperone cofactor-dependent protein refolding; F:ATP binding; F:heat shock protein binding; F:protein folding chaperone; F:unfolded protein binding; F:misfolded protein binding; C:endoplasmic reticulum lumen
22	A0A0C5CHE6_SOLLC	A0A0C5CHE6	UniRef90_P27065	Cluster: Ribulose bisphosphate carboxylase large chain	UniProtKB Reviewed (Swiss-Prot); UniProtKB Unreviewed (TrEMBL); UniParc	18136	Solanum lycopersicum (Tomato); Cuscuta sandwichiana (Kauna'oa); Ipomoea purpurea (Common morning glory); Phalaenopsis aphrodite subsp. formosana (Moth orchid); Mirabilis jalapa (Garden four-o'clock); Drimys granadensis; Lepidium virginicum (Virginia pepperweed); Panax ginseng (Korean ginseng); Solanum bulbocastanum (Wild potato); Nicotiana acuminata (Acuminate tobacco); Agrostis stolonifera (Cree…		ribulose-1,5-bisphosphate carboxylase/oxygenase large subunit	52920	21347.2	16	47	37.3166	1.1553	323	23.9181	true	[BLASTED, MAPPED, ANNOTATED]	tr|A0A0C5CHE6|A0A0C5CHE6_SOLLC	Ribulose bisphosphate carboxylase large chain OS=Solanum lycopersicum OX=4081 GN=rbcL PE=3 SV=1	477	20	0	99.78	6	P:GO:0009853; P:GO:0019253; F:GO:0000287; F:GO:0004497; F:GO:0016984; C:GO:0009507	P:photorespiration; P:reductive pentose-phosphate cycle; F:magnesium ion binding; F:monooxygenase activity; F:ribulose-bisphosphate carboxylase activity; C:chloroplast	EC:4.1.1.39; EC:1	Ribulose-bisphosphate carboxylase; Oxidoreductases
23	A0A3Q7FKE1_SOLLC	A0A3Q7FKE1	UniRef90_Q9FSY7	Cluster: Endoplasmic reticulum chaperone BiP	UniProtKB Reviewed (Swiss-Prot); UniProtKB Unreviewed (TrEMBL); UniParc	256	Corylus avellana (European hazel); Nicotiana tabacum (Common tobacco); Salix brachista; Salix viminalis (Common osier); Gossypium australe; Gossypium armourianum; Gossypium schwendimanii (Cotton); Cuscuta campestris; Eutrema salsugineum (Saltwater cress); Eutrema halophilum (Salt cress); Striga asiatica (Asiatic witchweed); Microthlaspi erraticum; Hevea brasiliensis (Para rubber tree); Capsicum a…		luminal-binding protein 5	73444	20820.1	16	73	35.1796	4.9079	364	35.5632	true	[BLASTED, MAPPED, ANNOTATED]	tr|A0A3Q7FKE1|A0A3Q7FKE1_SOLLC	Uncharacterized protein OS=Solanum lycopersicum OX=4081 PE=3 SV=1	668	20	0	97.88	13	P:GO:0030433; P:GO:0030968; P:GO:0042026; P:GO:0051085; F:GO:0005524; F:GO:0031072; F:GO:0044183; F:GO:0051082; F:GO:0051787; C:GO:0005634; C:GO:0005788; C:GO:0016021; C:GO:0034663	P:ubiquitin-dependent ERAD pathway; P:endoplasmic reticulum unfolded protein response; P:protein refolding; P:chaperone cofactor-dependent protein refolding; F:ATP binding; F:heat shock protein binding; F:protein folding chaperone; F:unfolded protein binding; F:misfolded protein binding; C:nucleus; C:endoplasmic reticulum lumen; C:integral component of membrane; C:endoplasmic reticulum chaperone …
24	A0A3Q7HX95_SOLLC	A0A3Q7HX95	UniRef90_Q2PYX3	Cluster: Fructose-bisphosphate aldolase	UniProtKB Unreviewed (TrEMBL); UniParc	34	Solanum tuberosum (Potato); Capsicum annuum (Capsicum pepper); Solanum chilense (Tomato); Solanum chacoense (Chaco potato); Nicotiana tabacum (Common tobacco); Nicotiana attenuata (Coyote tobacco); Solanum lycopersicum (Tomato); Capsicum chinense (Scotch bonnet); Nicotiana sylvestris (Wood tobacco); Capsicum baccatum (Peruvian pepper); Daucus carota subsp. sativus (Carrot); Proteus mirabilis; Ipo…		fructose-bisphosphate aldolase cytoplasmic isozyme-like	38652	15746.1	16	30	47.7654	1.7403	395	27.614	true	[BLASTED, MAPPED, ANNOTATED]	tr|A0A3Q7HX95|A0A3Q7HX95_SOLLC	Fructose-bisphosphate aldolase OS=Solanum lycopersicum OX=4081 GN=101266063 PE=3 SV=1	358	20	0	97.14	4	P:GO:0006096; P:GO:0030388; F:GO:0004332; C:GO:0005829	P:glycolytic process; P:fructose 1,6-bisphosphate metabolic process; F:fructose-bisphosphate aldolase activity; C:cytosol	EC:4.1.2.13	Fructose-bisphosphate aldolase
25	A0A3Q7IIS5_SOLLC	A0A3Q7IIS5	UniRef90_A0A3Q7IIS5	Cluster: Vacuolar proton pump subunit B	UniProtKB Unreviewed (TrEMBL)	5	Solanum lycopersicum (Tomato); Solanum tuberosum (Potato); Solanum chacoense (Chaco potato); Solanum chilense (Tomato); Lupinus albus (White lupine)		V-type proton ATPase subunit B2	54474	12629.6	16	45	41.5133	11.6032	349	26.2728	true	[BLASTED, MAPPED, ANNOTATED]	tr|A0A3Q7IIS5|A0A3Q7IIS5_SOLLC	Vacuolar proton pump subunit B OS=Solanum lycopersicum OX=4081 PE=3 SV=1	489	20	0	98.52	8	P:GO:0006468; P:GO:0046034; P:GO:1902600; F:GO:0004674; F:GO:0005524; C:GO:0005886; C:GO:0009536; C:GO:0033180	P:protein phosphorylation; P:ATP metabolic process; P:proton transmembrane transport; F:protein serine/threonine kinase activity; F:ATP binding; C:plasma membrane; C:plastid; C:proton-transporting V-type ATPase, V1 domain	EC:2.7.1	Transferring phosphorus-containing groups
26	HSP80_SOLLC	P36181	UniRef90_P55737	Cluster: Heat shock protein 90-2	UniProtKB Reviewed (Swiss-Prot); UniProtKB Unreviewed (TrEMBL); UniParc	677	Arabidopsis thaliana (Mouse-ear cress); Solanum lycopersicum (Tomato); Oryza sativa subsp. japonica (Rice); Oryza sativa subsp. indica (Rice); Gossypium arboreum (Tree cotton); Ageratina adenophora; Morus notabilis; Salix dunnii; Brassica oleracea (Wild cabbage); Noccaea caerulescens (Alpine penny-cress); Brassica cretica (Mustard); Lupinus albus (White lupine); Anthurium amnicola; Castanea molli…		heat shock cognate protein 80	80085	5212.77	16	80	25.1788	1.4391	384	25.9652	true	[BLASTED, MAPPED, ANNOTATED]	sp|P36181|HSP80_SOLLC	Heat shock cognate protein 80 OS=Solanum lycopersicum OX=4081 GN=HSC80 PE=2 SV=1	699	20	0	98.98	9	P:GO:0006457; P:GO:0034605; P:GO:0050821; F:GO:0005524; F:GO:0051082; C:GO:0005829; C:GO:0005886; C:GO:0032991; C:GO:0048471	P:protein folding; P:cellular response to heat; P:protein stabilization; F:ATP binding; F:unfolded protein binding; C:cytosol; C:plasma membrane; C:protein-containing complex; C:perinuclear region of cytoplasm
27	A0A3Q7HLX5_SOLLC	A0A3Q7HLX5	UniRef90_P51819	Cluster: Heat shock protein 83	UniProtKB Reviewed (Swiss-Prot); UniProtKB Unreviewed (TrEMBL); UniParc	111	Ipomoea nil (Japanese morning glory); Malus domestica (Apple); Salix viminalis (Common osier); Morella rubra; Momordica charantia (Bitter gourd); Rhododendron simsii (Sims's rhododendron); Tripterygium wilfordii (Thunder God vine); Nyssa sinensis; Punica granatum (Pomegranate); Quercus lobata (Valley oak); Gossypium mustelinum (Cotton); Gossypium barbadense (Sea-island cotton); Gossypium darwinii…		heat shock protein 83	80957	4775.36	16	81	22.5852	3.9389	356	27.2769	true	[BLASTED, MAPPED, ANNOTATED]	tr|A0A3Q7HLX5|A0A3Q7HLX5_SOLLC	HATPase_c domain-containing protein OS=Solanum lycopersicum OX=4081 PE=3 SV=1	704	20	0	97.96	9	P:GO:0006457; P:GO:0034605; P:GO:0050821; F:GO:0005524; F:GO:0051082; C:GO:0005829; C:GO:0005886; C:GO:0032991; C:GO:0048471	P:protein folding; P:cellular response to heat; P:protein stabilization; F:ATP binding; F:unfolded protein binding; C:cytosol; C:plasma membrane; C:protein-containing complex; C:perinuclear region of cytoplasm
28	A0A3Q7FEY7_SOLLC	A0A3Q7FEY7	UniRef90_A0A3Q7FEY7	Cluster: Regulator of chromosome condensation (RCC1) family protein	UniProtKB Unreviewed (TrEMBL); UniParc	5	Solanum lycopersicum (Tomato); Mojavia dolomitestris		PH, RCC1 and FYVE domains-containing protein 1	156691	3939.65	16	124	10.8834	7.6931	531	28.2702	true	[BLASTED, MAPPED, ANNOTATED]	tr|A0A3Q7FEY7|A0A3Q7FEY7_SOLLC	Uncharacterized protein OS=Solanum lycopersicum OX=4081 PE=3 SV=1	1415	20	0	84.13	1	F:GO:0046872	F:metal ion binding
29	A0A3Q7IRF8_SOLLC	A0A3Q7IRF8	UniRef90_A0A3Q7IRF8	Cluster: Glutamine synthetase	UniProtKB Unreviewed (TrEMBL)	2	Solanum lycopersicum (Tomato); Nymphaea colorata		kinesin light chain 3 isoform X2	95284	20665	15	82	27.7066	8.8619	346	31.4807	true	[BLASTED]	tr|A0A3Q7IRF8|A0A3Q7IRF8_SOLLC	Glutamine synthetase OS=Solanum lycopersicum OX=4081 PE=3 SV=1	859	20	0	89.93
30	ACCH3_SOLLC	P10967	UniRef90_P10967	Cluster: 1-aminocyclopropane-1-carboxylate oxidase homolog	UniProtKB Reviewed (Swiss-Prot); UniProtKB Unreviewed (TrEMBL); UniParc	4	Solanum lycopersicum (Tomato); Solanum chilense (Tomato); Solanum pennellii		1-aminocyclopropane-1-carboxylate oxidase homolog	41050	11398.7	15	27	44.6281	1.1087	448	23.8531	true	[BLASTED, MAPPED, ANNOTATED]	sp|P10967|ACCH3_SOLLC	1-aminocyclopropane-1-carboxylate oxidase homolog OS=Solanum lycopersicum OX=4081 GN=ACO3 PE=2 SV=1	363	20	0	89.12	5	P:GO:0009693; P:GO:0009835; F:GO:0016491; F:GO:0031418; F:GO:0046872	P:ethylene biosynthetic process; P:fruit ripening; F:oxidoreductase activity; F:L-ascorbic acid binding; F:metal ion binding	EC:1	Oxidoreductases
31	A0A3Q7HDP5_SOLLC	A0A3Q7HDP5	UniRef90_A0A3Q7HDP5	Cluster: Aspartic proteinase	UniProtKB Unreviewed (TrEMBL); UniParc	13	Solanum lycopersicum (Tomato); Solanum chacoense (Chaco potato); Capsicum baccatum (Peruvian pepper); Capsicum annuum (Capsicum pepper); Solanum tuberosum (Potato); Capsicum chinense (Scotch bonnet); Solanum chilense (Tomato); Solanum pennellii; Solanum stenotomum; Solanum verrucosum		Aspartic proteinase A2	55096	9705.06	15	40	35.8268	6.5635	444	27.1745	true	[BLASTED, MAPPED, ANNOTATED]	tr|A0A3Q7HDP5|A0A3Q7HDP5_SOLLC	Uncharacterized protein OS=Solanum lycopersicum OX=4081 GN=101258673 PE=3 SV=1	508	20	0	93.4	3	P:GO:0006508; P:GO:0006629; F:GO:0004190	P:proteolysis; P:lipid metabolic process; F:aspartic-type endopeptidase activity	EC:3.4.23	Acting on peptide bonds (peptidases)
32	A0A3Q7IXE6_SOLLC	A0A3Q7IXE6	UniRef90_A0A3Q7IXE6	Cluster: Patellin-3-like	UniProtKB Unreviewed (TrEMBL); UniParc	10	Solanum lycopersicum (Tomato); Solanum chilense (Tomato); Solanum tuberosum; Solanum stenotomum; Solanum verrucosum; Solanum pennellii		patellin-3-like	65654	6449.64	15	66	37.1817	0.7308	352	28.7734	true	[BLASTED, MAPPED, ANNOTATED]	tr|A0A3Q7IXE6|A0A3Q7IXE6_SOLLC	Uncharacterized protein OS=Solanum lycopersicum OX=4081 GN=101255264 PE=3 SV=1	589	20	0	81.97	3	P:GO:0007049; P:GO:0051301; F:GO:0008289	P:cell cycle; P:cell division; F:lipid binding
33	A0A3Q7HWE0_SOLLC	A0A3Q7HWE0	UniRef90_Q96372	Cluster: Cell division cycle protein 48 homolog	UniProtKB Reviewed (Swiss-Prot); UniProtKB Unreviewed (TrEMBL); UniParc	63	Capsicum annuum (Capsicum pepper); Nicotiana tabacum (Common tobacco); Nicotiana sylvestris (Wood tobacco); Nicotiana attenuata (Coyote tobacco); Salvia splendens (Scarlet sage); Erythranthe guttata (Yellow monkey flower); Solanum chacoense (Chaco potato); Capsicum baccatum (Peruvian pepper); Capsicum chinense (Scotch bonnet); Phtheirospermum japonicum; Solanum lycopersicum (Tomato); Solanum chil…		cell division cycle protein 48 homolog	89405	5188.4	15	73	29.0683	7.2835	569	32.7238	true	[BLASTED, MAPPED, ANNOTATED]	tr|A0A3Q7HWE0|A0A3Q7HWE0_SOLLC	Uncharacterized protein OS=Solanum lycopersicum OX=4081 GN=101266129 PE=4 SV=1	805	20	0	98.95	12	P:GO:0030433; P:GO:0030970; P:GO:0051228; P:GO:0051301; P:GO:0071712; P:GO:0097352; F:GO:0005524; F:GO:0016787; F:GO:0031593; C:GO:0005634; C:GO:0005829; C:GO:0034098	P:ubiquitin-dependent ERAD pathway; P:retrograde protein transport, ER to cytosol; P:mitotic spindle disassembly; P:cell division; P:ER-associated misfolded protein catabolic process; P:autophagosome maturation; F:ATP binding; F:hydrolase activity; F:polyubiquitin modification-dependent protein binding; C:nucleus; C:cytosol; C:VCP-NPL4-UFD1 AAA ATPase complex	EC:3	Hydrolases
34	A0A3Q7H3P6_SOLLC	A0A3Q7H3P6	UniRef90_A0A3Q7H3P6	Cluster: Heat shock cognate 70 kDa protein	UniProtKB Unreviewed (TrEMBL); UniParc	11	Solanum lycopersicum (Tomato); Closterium ehrenbergii (Green alga); Olea europaea subsp. europaea; Zea mays (Maize); Solanum tuberosum (Potato); Solanum chilense (Tomato)		heat shock cognate 70 kDa protein 2-like	70964	21059.2	14	55	33.642	2.6885	342	32.6482	true	[BLASTED, MAPPED, ANNOTATED]	tr|A0A3Q7H3P6|A0A3Q7H3P6_SOLLC	Uncharacterized protein OS=Solanum lycopersicum OX=4081 GN=100736433 PE=3 SV=1	648	20	0	98.81	9	P:GO:0034620; P:GO:0042026; P:GO:0051085; F:GO:0005524; F:GO:0031072; F:GO:0044183; F:GO:0051082; F:GO:0051787; C:GO:0005788	P:cellular response to unfolded protein; P:protein refolding; P:chaperone cofactor-dependent protein refolding; F:ATP binding; F:heat shock protein binding; F:protein folding chaperone; F:unfolded protein binding; F:misfolded protein binding; C:endoplasmic reticulum lumen
35	A0A3Q7GMW1_SOLLC	A0A3Q7GMW1	UniRef90_A0A3Q7GMW1	Cluster: UDP-arabinopyranose mutase	UniProtKB Unreviewed (TrEMBL)	2	Solanum lycopersicum (Tomato); Trifolium medium		uncharacterized WD repeat-containing protein C17D11.16-like	106620	13869.5	14	86	20.7254	7.7761	326	31.9718	true	[BLASTED, MAPPED, ANNOTATED]	tr|A0A3Q7GMW1|A0A3Q7GMW1_SOLLC	WD_REPEATS_REGION domain-containing protein OS=Solanum lycopersicum OX=4081 PE=4 SV=1	965	20	0	91.74	13	P:GO:0006364; P:GO:0006486; P:GO:0009832; P:GO:0030244; P:GO:0033356; P:GO:0071555; F:GO:0052691; C:GO:0005576; C:GO:0005618; C:GO:0005634; C:GO:0005794; C:GO:0005829; C:GO:0009506	P:rRNA processing; P:protein glycosylation; P:plant-type cell wall biogenesis; P:cellulose biosynthetic process; P:UDP-L-arabinose metabolic process; P:cell wall organization; F:UDP-arabinopyranose mutase activity; C:extracellular region; C:cell wall; C:nucleus; C:Golgi apparatus; C:cytosol; C:plasmodesma	EC:5.4.99.30	UDP-arabinopyranose mutase
36	ENO_SOLLC	P26300	UniRef90_P26300	Cluster: Enolase	UniProtKB Reviewed (Swiss-Prot); UniProtKB Unreviewed (TrEMBL); UniParc	14	Solanum lycopersicum (Tomato); Solanum chilense (Tomato); Solanum chacoense (Chaco potato); Nicotiana tabacum (Common tobacco); Nicotiana sylvestris (Wood tobacco); Nicotiana attenuata (Coyote tobacco); Solanum tuberosum (Potato); Capsicum annuum (Capsicum pepper); Capsicum baccatum (Peruvian pepper); Solanum verrucosum; Solanum pennellii		enolase	47768	12994.9	14	42	44.3694	5.892	349	31.7982	true	[BLASTED, MAPPED, ANNOTATED]	sp|P26300|ENO_SOLLC	Enolase OS=Solanum lycopersicum OX=4081 GN=PGH1 PE=2 SV=1	444	20	0	98.4	5	P:GO:0006096; P:GO:0032889; F:GO:0000287; F:GO:0004634; C:GO:0000015	P:glycolytic process; P:regulation of vacuole fusion, non-autophagic; F:magnesium ion binding; F:phosphopyruvate hydratase activity; C:phosphopyruvate hydratase complex	EC:4.2.1.11	Phosphopyruvate hydratase
37	A0A1B1FIK6_SOLLC	A0A1B1FIK6	UniRef90_P49319	Cluster: Catalase isozyme 1	UniProtKB Reviewed (Swiss-Prot); UniProtKB Unreviewed (TrEMBL); UniParc	35	Nicotiana tabacum (Common tobacco); Capsicum annuum (Capsicum pepper); Solanum melongena (Eggplant); Solanum lycopersicum (Tomato); Solanum tuberosum (Potato); Nicotiana plumbaginifolia (Leadwort-leaved tobacco); Solanum chacoense (Chaco potato); Capsicum chinense (Scotch bonnet); Solanum chilense (Tomato); Phanerochaete pseudomagnoliae; Xylaria sp; Nicotiana sylvestris (Wood tobacco); Nicotiana …		catalase	56316	9704.75	14	45	34.5528	3.7476	321	24.2931	true	[BLASTED, MAPPED, ANNOTATED]	tr|A0A1B1FIK6|A0A1B1FIK6_SOLLC	Catalase OS=Solanum lycopersicum OX=4081 GN=cat1 PE=2 SV=1	492	20	0	98.17	8	P:GO:0042542; P:GO:0042744; P:GO:0098869; F:GO:0004096; F:GO:0020037; F:GO:0046872; C:GO:0005886; C:GO:0009514	P:response to hydrogen peroxide; P:hydrogen peroxide catabolic process; P:cellular oxidant detoxification; F:catalase activity; F:heme binding; F:metal ion binding; C:plasma membrane; C:glyoxysome	EC:1.11.1.6	Catalase
38	A0A3Q7FAC9_SOLLC	A0A3Q7FAC9	UniRef90_A0A3Q7FAC9	Cluster: ATP synthase subunit beta	UniProtKB Unreviewed (TrEMBL); UniParc	6	Solanum lycopersicum (Tomato); Solanum tuberosum (Potato); Solanum chilense (Tomato); Solanum stenotomum; Solanum verrucosum		ATP synthase subunit beta, mitochondrial-like	59382	8100.01	14	43	28.8566	2.4406	387	28.5522	true	[BLASTED, MAPPED, ANNOTATED]	tr|A0A3Q7FAC9|A0A3Q7FAC9_SOLLC	ATP synthase subunit beta OS=Solanum lycopersicum OX=4081 GN=101264167 PE=3 SV=1	551	20	0	96.17	6	P:GO:0042776; F:GO:0005524; F:GO:0046933; F:GO:0046961; C:GO:0000275; C:GO:0009507	P:mitochondrial ATP synthesis coupled proton transport; F:ATP binding; F:proton-transporting ATP synthase activity, rotational mechanism; F:proton-transporting ATPase activity, rotational mechanism; C:mitochondrial proton-transporting ATP synthase complex, catalytic sector F(1); C:chloroplast	EC:7.1.3.1; EC:7.1.2.2; EC:6	H(+)-exporting diphosphatase; H(+)-transporting two-sector ATPase; Ligases
39	A0A3Q7FU78_SOLLC	A0A3Q7FU78	UniRef90_A0A3Q7FU78	Cluster: Calreticulin	UniProtKB Unreviewed (TrEMBL)	1	Solanum lycopersicum (Tomato)		calnexin homolog 1-like	83935	5747.21	14	64	22.9947	7.5315	318	30.7668	true	[BLASTED, MAPPED, ANNOTATED]	tr|A0A3Q7FU78|A0A3Q7FU78_SOLLC	Uncharacterized protein OS=Solanum lycopersicum OX=4081 PE=3 SV=1	748	20	0	91.99	7	P:GO:0006457; P:GO:0030433; F:GO:0005509; F:GO:0030246; F:GO:0051082; C:GO:0005789; C:GO:0016021	P:protein folding; P:ubiquitin-dependent ERAD pathway; F:calcium ion binding; F:carbohydrate binding; F:unfolded protein binding; C:endoplasmic reticulum membrane; C:integral component of membrane
40	A0A3Q7J0I3_SOLLC	A0A3Q7J0I3	UniRef90_A0A484KTD6	Cluster: RuBisCO large subunit-binding protein subunit alpha, chloroplastic	UniProtKB Unreviewed (TrEMBL); UniParc	25	Cuscuta campestris; Nicotiana tabacum (Common tobacco); Nicotiana sylvestris (Wood tobacco); Nicotiana attenuata (Coyote tobacco); Solanum tuberosum (Potato); Solanum lycopersicum (Tomato); Capsicum chinense (Scotch bonnet); Capsicum baccatum (Peruvian pepper); Capsicum annuum (Capsicum pepper); Solanum chacoense (Chaco potato); Ipomoea nil; Ipomoea triloba; Solanum verrucosum; Solanum stenotomum		ruBisCO large subunit-binding protein subunit alpha	61918	5322.02	14	51	35.034	4.9535	395	34.9532	true	[BLASTED, MAPPED, ANNOTATED]	tr|A0A3Q7J0I3|A0A3Q7J0I3_SOLLC	Uncharacterized protein OS=Solanum lycopersicum OX=4081 GN=101266598 PE=3 SV=1	588	20	0	96.36	2	P:GO:0042026; F:GO:0005524	P:protein refolding; F:ATP binding
41	A0A3Q7FGG9_SOLLC	A0A3Q7FGG9	UniRef90_P36182	Cluster: Heat shock protein 82 (Fragment)	UniProtKB Reviewed (Swiss-Prot); UniProtKB Unreviewed (TrEMBL); UniParc	21	Nicotiana tabacum (Common tobacco); Nicotiana sylvestris (Wood tobacco); Papaver somniferum (Opium poppy); Capsicum annuum (Capsicum pepper); Solanum chacoense (Chaco potato); Eucalyptus grandis (Flooded gum); Solanum lycopersicum (Tomato); Solanum chilense (Tomato); Solanum tuberosum (Potato); Nicotiana attenuata (Coyote tobacco); Capsicum baccatum (Peruvian pepper); Capsicum chinense (Scotch bo…		heat shock protein 82	80765	5189.66	14	82	21.5909	5.0156	336	25.5587	true	[BLASTED, MAPPED, ANNOTATED]	tr|A0A3Q7FGG9|A0A3Q7FGG9_SOLLC	HATPase_c domain-containing protein OS=Solanum lycopersicum OX=4081 PE=3 SV=1	704	20	0	99.27	9	P:GO:0006457; P:GO:0034605; P:GO:0050821; F:GO:0005524; F:GO:0051082; C:GO:0005829; C:GO:0005886; C:GO:0032991; C:GO:0048471	P:protein folding; P:cellular response to heat; P:protein stabilization; F:ATP binding; F:unfolded protein binding; C:cytosol; C:plasma membrane; C:protein-containing complex; C:perinuclear region of cytoplasm
42	A0A3Q7FE06_SOLLC	A0A3Q7FE06	UniRef90_A0A3Q7FE06	Cluster: V-type proton ATPase subunit a	UniProtKB Unreviewed (TrEMBL); UniParc	17	Solanum lycopersicum (Tomato); Solanum chacoense (Chaco potato); Solanum chilense (Tomato); Capsicum chinense (Scotch bonnet); Capsicum annuum (Capsicum pepper); Capsicum baccatum (Peruvian pepper); Nicotiana tabacum (Common tobacco); Nicotiana sylvestris (Wood tobacco); Nicotiana attenuata (Coyote tobacco); Mojavia dolomitestris; Solanum stenotomum; Solanum verrucosum; Solanum pennellii; Nicotia…		V-type proton ATPase subunit a3	92689	4498.25	14	62	24.3902	1.7239	414	28.7395	true	[BLASTED, MAPPED, ANNOTATED]	tr|A0A3Q7FE06|A0A3Q7FE06_SOLLC	V-type proton ATPase subunit a OS=Solanum lycopersicum OX=4081 GN=101265176 PE=3 SV=1	820	20	0	95.27	15	P:GO:0006270; P:GO:0007035; P:GO:0032508; P:GO:1902600; F:GO:0003677; F:GO:0003678; F:GO:0005524; F:GO:0015078; F:GO:0016787; F:GO:0051117; C:GO:0000220; C:GO:0005634; C:GO:0016021; C:GO:0016471; C:GO:0042555	P:DNA replication initiation; P:vacuolar acidification; P:DNA duplex unwinding; P:proton transmembrane transport; F:DNA binding; F:DNA helicase activity; F:ATP binding; F:proton transmembrane transporter activity; F:hydrolase activity; F:ATPase binding; C:vacuolar proton-transporting V-type ATPase, V0 domain; C:nucleus; C:integral component of membrane; C:vacuolar proton-transporting V-type ATPas…	EC:3.6.4.12; EC:7	DNA helicase; Translocases
43	A0A3Q7IJU2_SOLLC	A0A3Q7IJU2	UniRef90_A0A3Q7IJU2	Cluster: Pyruvate decarboxylase	UniProtKB Unreviewed (TrEMBL); UniParc	16	Solanum lycopersicum (Tomato); Capsicum baccatum (Peruvian pepper); Capsicum chinense (Scotch bonnet); Nicotiana attenuata (Coyote tobacco); Nicotiana tabacum (Common tobacco); Capsicum annuum (Capsicum pepper); Nicotiana sylvestris (Wood tobacco); Solanum chilense (Tomato); Solanum verrucosum; Nicotiana tomentosiformis; Solanum stenotomum; Solanum tuberosum		pyruvate decarboxylase 1-like	65296	4257.17	14	41	25.7048	9.0259	375	32.4827	true	[BLASTED, MAPPED, ANNOTATED]	tr|A0A3Q7IJU2|A0A3Q7IJU2_SOLLC	Pyruvate decarboxylase OS=Solanum lycopersicum OX=4081 GN=101247173 PE=3 SV=1	603	20	0	96.42	4	F:GO:0000287; F:GO:0004737; F:GO:0030976; C:GO:0005829	F:magnesium ion binding; F:pyruvate decarboxylase activity; F:thiamine pyrophosphate binding; C:cytosol	EC:4.1.1.1	Pyruvate decarboxylase
44	A0A3Q7J082_SOLLC	A0A3Q7J082	UniRef90_Q96372	Cluster: Cell division cycle protein 48 homolog	UniProtKB Reviewed (Swiss-Prot); UniProtKB Unreviewed (TrEMBL); UniParc	63	Capsicum annuum (Capsicum pepper); Nicotiana tabacum (Common tobacco); Nicotiana sylvestris (Wood tobacco); Nicotiana attenuata (Coyote tobacco); Salvia splendens (Scarlet sage); Erythranthe guttata (Yellow monkey flower); Solanum chacoense (Chaco potato); Capsicum baccatum (Peruvian pepper); Capsicum chinense (Scotch bonnet); Phtheirospermum japonicum; Solanum lycopersicum (Tomato); Solanum chil…		cell division cycle protein 48 homolog	89511	3860.24	14	73	24.472	15.8298	462	31.567	true	[BLASTED, MAPPED, ANNOTATED]	tr|A0A3Q7J082|A0A3Q7J082_SOLLC	Uncharacterized protein OS=Solanum lycopersicum OX=4081 GN=101265798 PE=4 SV=1	805	20	0	98.9	12	P:GO:0030433; P:GO:0030970; P:GO:0051228; P:GO:0051301; P:GO:0071712; P:GO:0097352; F:GO:0005524; F:GO:0016787; F:GO:0031593; C:GO:0005634; C:GO:0005829; C:GO:0034098	P:ubiquitin-dependent ERAD pathway; P:retrograde protein transport, ER to cytosol; P:mitotic spindle disassembly; P:cell division; P:ER-associated misfolded protein catabolic process; P:autophagosome maturation; F:ATP binding; F:hydrolase activity; F:polyubiquitin modification-dependent protein binding; C:nucleus; C:cytosol; C:VCP-NPL4-UFD1 AAA ATPase complex	EC:3	Hydrolases
45	BIP_SOLLC	P49118	UniRef90_P24067	Cluster: Luminal-binding protein 2	UniProtKB Reviewed (Swiss-Prot); UniProtKB Unreviewed (TrEMBL); UniParc	56	Zea mays (Maize); Solanum lycopersicum (Tomato); Glycine max (Soybean); Glycine soja (Wild soybean); Medicago truncatula (Barrel medic); Papaver somniferum (Opium poppy); Trifolium medium; Solanum tuberosum (Potato); Lupinus albus (White lupine); Cicer arietinum (Chickpea); Musa balbisiana (Banana); Musa acuminata subsp. malaccensis (Wild banana); Solanum chilense (Tomato); Brachypodium distachyo…		luminal-binding protein	73189	19820.2	13	72	29.1291	9.7642	315	36.3723	true	[BLASTED, MAPPED, ANNOTATED]	sp|P49118|BIP_SOLLC	Luminal-binding protein OS=Solanum lycopersicum OX=4081 PE=2 SV=1	666	20	0	97.99	13	P:GO:0030433; P:GO:0030968; P:GO:0042026; P:GO:0051085; F:GO:0005524; F:GO:0031072; F:GO:0044183; F:GO:0051082; F:GO:0051787; C:GO:0005634; C:GO:0005788; C:GO:0016020; C:GO:0034663	P:ubiquitin-dependent ERAD pathway; P:endoplasmic reticulum unfolded protein response; P:protein refolding; P:chaperone cofactor-dependent protein refolding; F:ATP binding; F:heat shock protein binding; F:protein folding chaperone; F:unfolded protein binding; F:misfolded protein binding; C:nucleus; C:endoplasmic reticulum lumen; C:membrane; C:endoplasmic reticulum chaperone complex
46	A0A3Q7G9B3_SOLLC	A0A3Q7G9B3	UniRef90_A0A1U8GJT2	Cluster: Phosphoenolpyruvate carboxykinase (ATP)	UniProtKB Unreviewed (TrEMBL); UniParc	17	Capsicum annuum (Capsicum pepper); Capsicum baccatum (Peruvian pepper); Solanum tuberosum (Potato); Solanum lycopersicum (Tomato); Capsicum chinense (Scotch bonnet); Solanum chilense (Tomato); Solanum pennellii; Solanum verrucosum; Solanum stenotomum		Phosphoenolpyruvate carboxykinase [ATP]	73418	7939.15	13	59	30.5136	13.833	549	35.5643	true	[BLASTED, MAPPED, ANNOTATED]	tr|A0A3Q7G9B3|A0A3Q7G9B3_SOLLC	Phosphoenolpyruvate carboxykinase (ATP) OS=Solanum lycopersicum OX=4081 GN=543812 PE=3 SV=1	662	20	0	96.45	6	P:GO:0006094; P:GO:0016310; F:GO:0004612; F:GO:0005524; F:GO:0016301; C:GO:0005829	P:gluconeogenesis; P:phosphorylation; F:phosphoenolpyruvate carboxykinase (ATP) activity; F:ATP binding; F:kinase activity; C:cytosol	EC:4.1.1.49; EC:2.7; EC:4.1.1.32	Phosphoenolpyruvate carboxykinase (ATP); Transferring phosphorus-containing groups; Phosphoenolpyruvate carboxykinase (GTP)
47	A0A3Q7ILY0_SOLLC	A0A3Q7ILY0	UniRef90_Q2PYX3	Cluster: Fructose-bisphosphate aldolase	UniProtKB Unreviewed (TrEMBL); UniParc	34	Solanum tuberosum (Potato); Capsicum annuum (Capsicum pepper); Solanum chilense (Tomato); Solanum chacoense (Chaco potato); Nicotiana tabacum (Common tobacco); Nicotiana attenuata (Coyote tobacco); Solanum lycopersicum (Tomato); Capsicum chinense (Scotch bonnet); Nicotiana sylvestris (Wood tobacco); Capsicum baccatum (Peruvian pepper); Daucus carota subsp. sativus (Carrot); Proteus mirabilis; Ipo…		Fructose-bisphosphate aldolase, cytoplasmic isozyme	38113	7007.19	13	30	43.8202	1.9396	317	34.3825	true	[BLASTED, MAPPED, ANNOTATED]	tr|A0A3Q7ILY0|A0A3Q7ILY0_SOLLC	Fructose-bisphosphate aldolase OS=Solanum lycopersicum OX=4081 PE=3 SV=1	356	20	0	97.35	4	P:GO:0006096; P:GO:0030388; F:GO:0004332; C:GO:0005829	P:glycolytic process; P:fructose 1,6-bisphosphate metabolic process; F:fructose-bisphosphate aldolase activity; C:cytosol	EC:4.1.2.13	Fructose-bisphosphate aldolase
48	A0A3Q7ECG0_SOLLC	A0A3Q7ECG0	UniRef90_A0A3Q7ECG0	Cluster: RuBisCO large subunit-binding protein subunit beta, chloroplastic	UniProtKB Unreviewed (TrEMBL); UniParc	21	Solanum lycopersicum (Tomato); Solanum chilense (Tomato); Capsicum annuum (Capsicum pepper); Solanum commersonii (Commerson's wild potato); Nicotiana sylvestris (Wood tobacco); Solanum tuberosum (Potato); Solanum chacoense (Chaco potato); Nicotiana tabacum (Common tobacco); Nicotiana attenuata (Coyote tobacco); Capsicum baccatum (Peruvian pepper); Capsicum chinense (Scotch bonnet); Solanum verruc…		ruBisCO large subunit-binding protein subunit beta, chloroplastic	62953	6383.01	13	61	26.2104	2.6155	366	27.7248	true	[BLASTED, MAPPED, ANNOTATED]	tr|A0A3Q7ECG0|A0A3Q7ECG0_SOLLC	Uncharacterized protein OS=Solanum lycopersicum OX=4081 GN=101253117 PE=3 SV=1	599	20	0	96.71	5	P:GO:0042026; P:GO:0051085; F:GO:0005524; C:GO:0009570; C:GO:0022626	P:protein refolding; P:chaperone cofactor-dependent protein refolding; F:ATP binding; C:chloroplast stroma; C:cytosolic ribosome
49	Q6UJX4_SOLLC	Q6UJX4	UniRef90_P55737	Cluster: Heat shock protein 90-2	UniProtKB Reviewed (Swiss-Prot); UniProtKB Unreviewed (TrEMBL); UniParc	677	Arabidopsis thaliana (Mouse-ear cress); Solanum lycopersicum (Tomato); Oryza sativa subsp. japonica (Rice); Oryza sativa subsp. indica (Rice); Gossypium arboreum (Tree cotton); Ageratina adenophora; Morus notabilis; Salix dunnii; Brassica oleracea (Wild cabbage); Noccaea caerulescens (Alpine penny-cress); Brassica cretica (Mustard); Lupinus albus (White lupine); Anthurium amnicola; Castanea molli…		heat shock cognate protein 80-like	80108	4835.44	13	80	21.03	2.4819	359	26.1012	true	[BLASTED, MAPPED, ANNOTATED]	tr|Q6UJX4|Q6UJX4_SOLLC	Molecular chaperone Hsp90-1 OS=Solanum lycopersicum OX=4081 GN=543902 PE=2 SV=1	699	20	0	99.51	9	P:GO:0006457; P:GO:0034605; P:GO:0050821; F:GO:0005524; F:GO:0051082; C:GO:0005829; C:GO:0005886; C:GO:0032991; C:GO:0048471	P:protein folding; P:cellular response to heat; P:protein stabilization; F:ATP binding; F:unfolded protein binding; C:cytosol; C:plasma membrane; C:protein-containing complex; C:perinuclear region of cytoplasm
50	A0A3Q7IMF7_SOLLC	A0A3Q7IMF7	UniRef90_A0A3Q7IMF7	Cluster: Cell division cycle protein 48 homolog	UniProtKB Unreviewed (TrEMBL); UniParc	108	Solanum lycopersicum (Tomato); Cajanus cajan (Pigeon pea); Brassica campestris (Field mustard); Brassica napus (Rape); Gossypium arboreum (Tree cotton); Papaver somniferum (Opium poppy); Carex littledalei; Phoenix dactylifera (Date palm); Brassica oleracea var. oleracea; Brassica cretica (Mustard); Brassica oleracea (Wild cabbage); Lupinus albus (White lupine); Capsicum baccatum (Peruvian pepper)…		cell division cycle protein 48 homolog	89741	4013.3	13	72	24.6287	2.3528	440	30.8768	true	[BLASTED, MAPPED, ANNOTATED]	tr|A0A3Q7IMF7|A0A3Q7IMF7_SOLLC	Uncharacterized protein OS=Solanum lycopersicum OX=4081 GN=101246391 PE=4 SV=1	808	20	0	98.81	12	P:GO:0030433; P:GO:0030970; P:GO:0051228; P:GO:0051301; P:GO:0071712; P:GO:0097352; F:GO:0005524; F:GO:0016787; F:GO:0031593; C:GO:0005634; C:GO:0005829; C:GO:0034098	P:ubiquitin-dependent ERAD pathway; P:retrograde protein transport, ER to cytosol; P:mitotic spindle disassembly; P:cell division; P:ER-associated misfolded protein catabolic process; P:autophagosome maturation; F:ATP binding; F:hydrolase activity; F:polyubiquitin modification-dependent protein binding; C:nucleus; C:cytosol; C:VCP-NPL4-UFD1 AAA ATPase complex	EC:3	Hydrolases
51	Q9SYU8_SOLLC	Q9SYU8	UniRef90_P30221	Cluster: 17.8 kDa class I heat shock protein	UniProtKB Reviewed (Swiss-Prot); UniProtKB Unreviewed (TrEMBL); UniParc	63	Solanum lycopersicum (Tomato); Solanum peruvianum (Peruvian tomato); Solanum tuberosum (Potato); Solanum chilense (Tomato); Capsicum annuum (Capsicum pepper); Capsicum baccatum (Peruvian pepper); Capsicum chinense (Scotch bonnet); Nicotiana attenuata (Coyote tobacco); Nicotiana tabacum (Common tobacco); Escherichia coli; Solanum verrucosum; Solanum stenotomum; Solanum pennellii; Nicotiana tomento…		17.6 kDa class I heat shock protein-like	17723	12320.5	12	17	61.039	1.1993	245	21.0032	true	[BLASTED, MAPPED, ANNOTATED]	tr|Q9SYU8|Q9SYU8_SOLLC	17.7 kD class I small heat shock protein OS=Solanum lycopersicum OX=4081 GN=HSP17.7 PE=2 SV=1	154	20	4.66247e-106	97.79	8	P:GO:0006457; P:GO:0009408; P:GO:0009651; P:GO:0042542; P:GO:0051259; F:GO:0043621; F:GO:0051082; C:GO:0005737	P:protein folding; P:response to heat; P:response to salt stress; P:response to hydrogen peroxide; P:protein complex oligomerization; F:protein self-association; F:unfolded protein binding; C:cytoplasm
52	A0A6F8PJG0_SOLLC	A0A6F8PJG0	UniRef90_A0A3Q7FJI3	Cluster: Fe2OG dioxygenase domain-containing protein	UniProtKB Unreviewed (TrEMBL); UniParc	7	Solanum lycopersicum (Tomato); Solanum lycopersicum var. cerasiforme; Solanum chilense (Tomato); Solanum pennellii		probable 2-oxoglutarate-dependent dioxygenase AOP1	36497	24998.8	11	26	55.1402	2.5523	322	32.2039	true	[BLASTED, MAPPED, ANNOTATED]	tr|A0A6F8PJG0|A0A6F8PJG0_SOLLC	Alpha-tomatine 23-hydroxylase OS=Solanum lycopersicum OX=4081 GN=23DOX PE=2 SV=1	321	20	0	89.92	3	F:GO:0031418; F:GO:0046872; F:GO:0051213	F:L-ascorbic acid binding; F:metal ion binding; F:dioxygenase activity	EC:1	Oxidoreductases
53	EF1A_SOLLC	P17786	UniRef90_P43643	Cluster: Elongation factor 1-alpha	UniProtKB Reviewed (Swiss-Prot); UniProtKB Unreviewed (TrEMBL); UniParc	175	Nicotiana tabacum (Common tobacco); Solanum lycopersicum (Tomato); Hordeum vulgare (Barley); Daucus carota (Wild carrot); Glycine max (Soybean); Zingiber officinale (Ginger); Aegilops tauschii subsp. strangulata (Goatgrass); Lolium multiflorum (Italian ryegrass); Artemisia annua (Sweet wormwood); Tripterygium wilfordii (Thunder God vine); Salix suchowensis; Salvia splendens (Scarlet sage); Nitril…		elongation factor 1-alpha	49256	11572.2	11	46	24.1071	2.2234	242	26.5319	true	[BLASTED, MAPPED, ANNOTATED]	sp|P17786|EF1A_SOLLC	Elongation factor 1-alpha OS=Solanum lycopersicum OX=4081 PE=2 SV=1	448	20	0	99.91	5	P:GO:0006414; F:GO:0003746; F:GO:0003924; F:GO:0005525; C:GO:0005737	P:translational elongation; F:translation elongation factor activity; F:GTPase activity; F:GTP binding; C:cytoplasm	EC:3.6.1	Acting on acid anhydrides
54	A0A3Q7FLI5_SOLLC	A0A3Q7FLI5	UniRef90_P42055	Cluster: Mitochondrial outer membrane protein porin of 34 kDa	UniProtKB Reviewed (Swiss-Prot); UniProtKB Unreviewed (TrEMBL); UniParc	14	Solanum tuberosum (Potato); Capsicum chinense (Scotch bonnet); Capsicum annuum (Capsicum pepper); Solanum lycopersicum (Tomato); Solanum chacoense (Chaco potato); Solanum chilense (Tomato); Nicotiana tabacum (Common tobacco); Nicotiana sylvestris (Wood tobacco); Capsicum baccatum (Peruvian pepper); Solanum pennellii; Solanum stenotomum; Nicotiana attenuata		mitochondrial outer membrane protein porin of 34 kDa	29541	10624.6	11	21	63.4058	1.1169	263	28.4937	true	[BLASTED, MAPPED, ANNOTATED]	tr|A0A3Q7FLI5|A0A3Q7FLI5_SOLLC	Uncharacterized protein OS=Solanum lycopersicum OX=4081 GN=101264394 PE=3 SV=1	276	20	0	96.39	6	P:GO:0015698; P:GO:0098656; F:GO:0008308; F:GO:0015288; C:GO:0005741; C:GO:0046930	P:inorganic anion transport; P:anion transmembrane transport; F:voltage-gated anion channel activity; F:porin activity; C:mitochondrial outer membrane; C:pore complex	EC:7	Translocases
55	A0A3Q7I5Y6_SOLLC	A0A3Q7I5Y6	UniRef90_A0A3Q7I5Y6	Cluster: Cupin type-1 domain-containing protein	UniProtKB Unreviewed (TrEMBL); UniParc	7	Solanum lycopersicum (Tomato); Solanum tuberosum (Potato); Solanum stenotomum; Solanum verrucosum; Solanum pennellii		vicilin-like antimicrobial peptides 2-2	42692	6976.84	11	35	33.8583	0.9155	220	24.2111	true	[BLASTED]	tr|A0A3Q7I5Y6|A0A3Q7I5Y6_SOLLC	Uncharacterized protein OS=Solanum lycopersicum OX=4081 PE=4 SV=1	381	20	0	86
56	PGLR_SOLLC	P05117	UniRef90_P05117	Cluster: Polygalacturonase-2	UniProtKB Reviewed (Swiss-Prot); UniProtKB Unreviewed (TrEMBL); UniParc	5	Solanum lycopersicum (Tomato); Carica papaya (Papaya); Solanum chilense (Tomato); Solanum pennellii		polygalacturonase-2-like	50019	5664.73	11	25	26.2582	0.9826	267	27.2004	true	[BLASTED, MAPPED, ANNOTATED]	sp|P05117|PGLR_SOLLC	Polygalacturonase-2 OS=Solanum lycopersicum OX=4081 GN=PG2 PE=1 SV=1	457	20	0	81.67	8	P:GO:0009835; P:GO:0009901; P:GO:0010047; P:GO:0045490; P:GO:0071555; F:GO:0004650; C:GO:0005618; C:GO:0048046	P:fruit ripening; P:anther dehiscence; P:fruit dehiscence; P:pectin catabolic process; P:cell wall organization; F:polygalacturonase activity; C:cell wall; C:apoplast	EC:3.2.1.15	Endo-polygalacturonase
57	A0A3Q7FS03_SOLLC	A0A3Q7FS03	UniRef90_A0A3Q7FS03	Cluster: Heat shock protein 70 family	UniProtKB Unreviewed (TrEMBL); UniParc	22	Solanum lycopersicum (Tomato); Olea europaea subsp. europaea; Rhodamnia argentea; Solanum chilense (Tomato); Capsicum annuum (Capsicum pepper); Capsicum baccatum (Peruvian pepper); Ziziphus jujuba (Chinese jujube); Capsicum chinense (Scotch bonnet); Punica granatum (Pomegranate); Herrania umbratica; Corchorus capsularis (Jute); Pistacia vera; Solanum stenotomum; Solanum pennellii; Mojavia dolomit…		heat shock 70 kDa protein	71804	19363.8	10	55	18.9602	7.6847	274	36.3475	true	[BLASTED, MAPPED, ANNOTATED]	tr|A0A3Q7FS03|A0A3Q7FS03_SOLLC	Uncharacterized protein OS=Solanum lycopersicum OX=4081 GN=101255185 PE=3 SV=1	654	20	0	97.39	10	P:GO:0034620; P:GO:0042026; P:GO:0051085; F:GO:0005524; F:GO:0031072; F:GO:0032440; F:GO:0044183; F:GO:0051082; F:GO:0051787; C:GO:0005788	P:cellular response to unfolded protein; P:protein refolding; P:chaperone cofactor-dependent protein refolding; F:ATP binding; F:heat shock protein binding; F:2-alkenal reductase [NAD(P)+] activity; F:protein folding chaperone; F:unfolded protein binding; F:misfolded protein binding; C:endoplasmic reticulum lumen	EC:1.3.1.74	2-alkenal reductase (NAD(P)(+))
58	A0A3Q7JAQ4_SOLLC	A0A3Q7JAQ4	UniRef90_A0A3Q7JAQ4	Cluster: V-type proton ATPase catalytic subunit A	UniProtKB Unreviewed (TrEMBL)	1	Solanum lycopersicum (Tomato)		V-type proton ATPase catalytic subunit A	29880	13421.4	10	24	50.8961	1.5667	270	29.6484	true	[BLASTED, MAPPED, ANNOTATED]	tr|A0A3Q7JAQ4|A0A3Q7JAQ4_SOLLC	Uncharacterized protein OS=Solanum lycopersicum OX=4081 PE=3 SV=1	279	20	0	97.94	7	P:GO:0015986; F:GO:0005524; F:GO:0046933; F:GO:0046961; C:GO:0000325; C:GO:0009507; C:GO:0033180	P:ATP synthesis coupled proton transport; F:ATP binding; F:proton-transporting ATP synthase activity, rotational mechanism; F:proton-transporting ATPase activity, rotational mechanism; C:plant-type vacuole; C:chloroplast; C:proton-transporting V-type ATPase, V1 domain	EC:7.1.3.1; EC:7.1.2.2; EC:6	H(+)-exporting diphosphatase; H(+)-transporting two-sector ATPase; Ligases
59	A0A3Q7HI50_SOLLC	A0A3Q7HI50	UniRef90_A0A3Q7HI50	Cluster: Pectinesterase	UniProtKB Unreviewed (TrEMBL)	2	Solanum lycopersicum (Tomato)		pectinesterase 3	176586	10361.4	10	130	10.0935	15.0856	393	34.7187	true	[BLASTED, MAPPED, ANNOTATED]	tr|A0A3Q7HI50|A0A3Q7HI50_SOLLC	Pectinesterase OS=Solanum lycopersicum OX=4081 PE=3 SV=1	1605	20	0	87.65	10	P:GO:0009835; P:GO:0042545; P:GO:0043086; P:GO:0045490; F:GO:0030599; F:GO:0045330; F:GO:0046910; C:GO:0005576; C:GO:0005618; C:GO:0016021	P:fruit ripening; P:cell wall modification; P:negative regulation of catalytic activity; P:pectin catabolic process; F:pectinesterase activity; F:aspartyl esterase activity; F:pectinesterase inhibitor activity; C:extracellular region; C:cell wall; C:integral component of membrane	EC:3.1.1.11	Pectinesterase
60	Q40140_SOLLC	Q40140	UniRef90_A0A3Q7EQQ1	Cluster: Aspartic proteinase	UniProtKB Unreviewed (TrEMBL); UniParc	16	Solanum lycopersicum (Tomato); Solanum tuberosum (Potato); Solanum chacoense (Chaco potato); Solanum chilense (Tomato); Solanum pennellii; Solanum stenotomum		aspartic proteinase A1-like isoform X1	55062	9603.43	10	40	30.6324	4.5709	342	30.839	true	[BLASTED, MAPPED, ANNOTATED]	tr|Q40140|Q40140_SOLLC	Aspartic protease OS=Solanum lycopersicum OX=4081 PE=2 SV=1	506	20	0	93.68	3	P:GO:0006508; P:GO:0006629; F:GO:0004190	P:proteolysis; P:lipid metabolic process; F:aspartic-type endopeptidase activity	EC:3.4.23	Acting on peptide bonds (peptidases)
61	A0A0U1ZE11_9SOLN	A0A0U1ZE11	UniRef90_P00825	Cluster: ATP synthase subunit beta, chloroplastic	UniProtKB Reviewed (Swiss-Prot); UniProtKB Unreviewed (TrEMBL); UniParc	4703	Spinacia oleracea (Spinach); Amborella trichopoda; Solanum lycopersicum (Tomato); Nicotiana sp. (Tobacco); Lactuca sativa (Garden lettuce); Nicotiana tabacum (Common tobacco); Schisandra sphenanthera (Southern magnolia vine); Helianthus annuus (Common sunflower); Nypa fruticans (Nypa palm); Vitis vinifera (Grape); Panax ginseng (Korean ginseng); Solanum tuberosum (Potato); Coffea arabica (Arabian…		AtpB	53433	9417.67	10	42	32.7309	2.4468	332	33.8623	true	[BLASTED, MAPPED, ANNOTATED]	tr|A0A0U1ZE11|A0A0U1ZE11_9SOLN	ATP synthase subunit beta_ chloroplastic OS=Solanum neorickii OX=62891 GN=atpB PE=3 SV=1	498	20	0	99.84	7	P:GO:0042776; F:GO:0005524; F:GO:0046933; F:GO:0046961; C:GO:0005753; C:GO:0009535; C:GO:0045261	P:mitochondrial ATP synthesis coupled proton transport; F:ATP binding; F:proton-transporting ATP synthase activity, rotational mechanism; F:proton-transporting ATPase activity, rotational mechanism; C:mitochondrial proton-transporting ATP synthase complex; C:chloroplast thylakoid membrane; C:proton-transporting ATP synthase complex, catalytic core F(1)	EC:7.1.3.1; EC:7.1.2.2; EC:6	H(+)-exporting diphosphatase; H(+)-transporting two-sector ATPase; Ligases
62	A0A3Q7IJX7_SOLLC	A0A3Q7IJX7	UniRef90_A0A3Q7IJX7	Cluster: Histidine decarboxylase	UniProtKB Unreviewed (TrEMBL); UniParc	3	Solanum lycopersicum (Tomato); Solanum pennellii		histidine decarboxylase-like	50833	8592.91	10	41	27.7027	0.8495	264	30.8069	true	[BLASTED, MAPPED, ANNOTATED]	tr|A0A3Q7IJX7|A0A3Q7IJX7_SOLLC	Uncharacterized protein OS=Solanum lycopersicum OX=4081 GN=101248029 PE=3 SV=1	444	20	0	90.13	3	P:GO:0019752; F:GO:0004398; F:GO:0030170	P:carboxylic acid metabolic process; F:histidine decarboxylase activity; F:pyridoxal phosphate binding	EC:4.1.1.22	Histidine decarboxylase
63	A0A3Q7EWZ3_SOLLC	A0A3Q7EWZ3	UniRef90_A0A3Q7EWZ3	Cluster: Pathogen-related protein-like	UniProtKB Unreviewed (TrEMBL); UniParc	5	Solanum lycopersicum (Tomato); Solanum pennellii		pathogen-related protein-like	28870	7123.17	10	19	51.6	6.7294	239	33.7921	true	[BLASTED]	tr|A0A3Q7EWZ3|A0A3Q7EWZ3_SOLLC	Uncharacterized protein OS=Solanum lycopersicum OX=4081 GN=101249032 PE=4 SV=1	250	20	0	90.24
64	A0A3Q7FN07_SOLLC	A0A3Q7FN07	UniRef90_A0A2G3A7D2	Cluster: V-type proton ATPase subunit C	UniProtKB Unreviewed (TrEMBL); UniParc	23	Capsicum annuum (Capsicum pepper); Capsicum baccatum (Peruvian pepper); Capsicum chinense (Scotch bonnet); Nicotiana tabacum (Common tobacco); Nicotiana sylvestris (Wood tobacco); Solanum chacoense (Chaco potato); Solanum chilense (Tomato); Solanum lycopersicum (Tomato); Nicotiana attenuata (Coyote tobacco); Solanum verrucosum; Solanum stenotomum; Mojavia dolomitestris; Nicotiana tomentosiformis		V-type proton ATPase subunit C	42785	6429.81	10	33	42.8191	2.4944	290	35.7588	true	[BLASTED, MAPPED, ANNOTATED]	tr|A0A3Q7FN07|A0A3Q7FN07_SOLLC	V-type proton ATPase subunit C OS=Solanum lycopersicum OX=4081 PE=3 SV=1	376	20	0	97.58	3	P:GO:1902600; F:GO:0046961; C:GO:0000221	P:proton transmembrane transport; F:proton-transporting ATPase activity, rotational mechanism; C:vacuolar proton-transporting V-type ATPase, V1 domain	EC:7.1.3.1	H(+)-exporting diphosphatase
65	A0A3Q7IXY6_SOLLC	A0A3Q7IXY6	UniRef90_P25083	Cluster: ADP,ATP carrier protein, mitochondrial	UniProtKB Reviewed (Swiss-Prot); UniProtKB Unreviewed (TrEMBL); UniParc	14	Solanum tuberosum (Potato); Solanum lycopersicum (Tomato); Nicotiana attenuata (Coyote tobacco); Solanum chilense (Tomato); Solanum stenotomum; Kribbella monticola; Solanum pennellii		ADP,ATP carrier protein, mitochondrial	42056	6297.61	10	35	21.7617	1.3246	227	29.2565	true	[BLASTED, MAPPED, ANNOTATED]	tr|A0A3Q7IXY6|A0A3Q7IXY6_SOLLC	Uncharacterized protein OS=Solanum lycopersicum OX=4081 PE=3 SV=1	386	20	0	97.79	5	P:GO:0140021; P:GO:1990544; F:GO:0005471; C:GO:0005743; C:GO:0016021	P:mitochondrial ADP transmembrane transport; P:mitochondrial ATP transmembrane transport; F:ATP:ADP antiporter activity; C:mitochondrial inner membrane; C:integral component of membrane	EC:7	Translocases
66	A0A3Q7H3Z8_SOLLC	A0A3Q7H3Z8	UniRef90_A0A3Q7H3Z8	Cluster: SHSP domain-containing protein	UniProtKB Unreviewed (TrEMBL)	1	Solanum lycopersicum (Tomato)		Alpha crystallin/Hsp20 domain-containing protein	33953	5946.52	10	33	29.0541	1.0991	207	20.5436	true	[BLASTED, MAPPED, ANNOTATED]	tr|A0A3Q7H3Z8|A0A3Q7H3Z8_SOLLC	Uncharacterized protein OS=Solanum lycopersicum OX=4081 PE=3 SV=1	296	20	4.57898e-176	82.83	1	C:GO:0005737	C:cytoplasm
67	A0A3Q7HMP2_SOLLC	A0A3Q7HMP2	UniRef90_Q40465	Cluster: Eukaryotic initiation factor 4A-11	UniProtKB Reviewed (Swiss-Prot); UniProtKB Unreviewed (TrEMBL); UniParc	88	Nicotiana tabacum (Common tobacco); Nicotiana plumbaginifolia (Leadwort-leaved tobacco); Capsicum annuum (Capsicum pepper); Capsicum baccatum (Peruvian pepper); Actinidia chinensis var. chinensis (Chinese soft-hair kiwi); Salvia splendens (Scarlet sage); Lupinus albus (White lupine); Solanum tuberosum (Potato); Nicotiana attenuata (Coyote tobacco); Nicotiana sylvestris (Wood tobacco); Nicotiana b…		eukaryotic initiation factor 4A-2	46858	5752.68	10	42	34.8668	0.98	293	34.8038	true	[BLASTED, MAPPED, ANNOTATED]	tr|A0A3Q7HMP2|A0A3Q7HMP2_SOLLC	Uncharacterized protein OS=Solanum lycopersicum OX=4081 GN=101252510 PE=3 SV=1	413	20	0	99.67	8	P:GO:0002183; F:GO:0003724; F:GO:0003729; F:GO:0003743; F:GO:0005524; F:GO:0016787; C:GO:0005730; C:GO:0071013	P:cytoplasmic translational initiation; F:RNA helicase activity; F:mRNA binding; F:translation initiation factor activity; F:ATP binding; F:hydrolase activity; C:nucleolus; C:catalytic step 2 spliceosome	EC:3.6.4.13	RNA helicase
68	A0A3Q7HIX0_SOLLC	A0A3Q7HIX0	UniRef90_O04973	Cluster: 2-isopropylmalate synthase A	UniProtKB Reviewed (Swiss-Prot); UniProtKB Unreviewed (TrEMBL); UniParc	10	Solanum pennellii (Tomato); Solanum lycopersicum (Tomato); Solanum chilense (Tomato); Solanum tuberosum (Potato); Solanum chacoense (Chaco potato); Solanum stenotomum; Solanum verrucosum		2-isopropylmalate synthase B	72586	4587.26	10	53	23.6006	2.9843	343	30.8814	true	[BLASTED, MAPPED, ANNOTATED]	tr|A0A3Q7HIX0|A0A3Q7HIX0_SOLLC	2-isopropylmalate synthase OS=Solanum lycopersicum OX=4081 PE=3 SV=1	661	20	0	93.15	4	P:GO:0009082; P:GO:0009098; F:GO:0003852; C:GO:0009507	P:branched-chain amino acid biosynthetic process; P:leucine biosynthetic process; F:2-isopropylmalate synthase activity; C:chloroplast	EC:2.3.3.13	2-isopropylmalate synthase
69	A0A3Q7ISP8_SOLLC	A0A3Q7ISP8	UniRef90_A0A3Q7ISP8	Cluster: Cell division cycle protein 48 homolog	UniProtKB Unreviewed (TrEMBL); UniParc	6	Solanum lycopersicum (Tomato); Salvia splendens (Scarlet sage); Coffea canephora (Robusta coffee); Salvia hispanica		cell division cycle protein 48 homolog	89992	3010.44	10	73	16.0891	11.3288	310	32.1324	true	[BLASTED, MAPPED, ANNOTATED]	tr|A0A3Q7ISP8|A0A3Q7ISP8_SOLLC	Uncharacterized protein OS=Solanum lycopersicum OX=4081 GN=101266255 PE=4 SV=1	808	20	0	97.61	12	P:GO:0030433; P:GO:0030970; P:GO:0051228; P:GO:0051301; P:GO:0071712; P:GO:0097352; F:GO:0005524; F:GO:0016787; F:GO:0031593; C:GO:0005634; C:GO:0005829; C:GO:0034098	P:ubiquitin-dependent ERAD pathway; P:retrograde protein transport, ER to cytosol; P:mitotic spindle disassembly; P:cell division; P:ER-associated misfolded protein catabolic process; P:autophagosome maturation; F:ATP binding; F:hydrolase activity; F:polyubiquitin modification-dependent protein binding; C:nucleus; C:cytosol; C:VCP-NPL4-UFD1 AAA ATPase complex	EC:3	Hydrolases
70	A0A3Q7GNR7_SOLLC	A0A3Q7GNR7	UniRef90_A0A3Q7GNR7	Cluster: Heat shock protein 70 family	UniProtKB Unreviewed (TrEMBL); UniParc	8	Solanum lycopersicum (Tomato); Solanum tuberosum (Potato); Solanum pennellii		heat shock cognate 70 kDa protein 2-like	58656	20091.8	9	48	20.8647	12.3038	252	30.9999	true	[BLASTED, MAPPED, ANNOTATED]	tr|A0A3Q7GNR7|A0A3Q7GNR7_SOLLC	Uncharacterized protein OS=Solanum lycopersicum OX=4081 PE=3 SV=1	532	20	0	91.63	9	P:GO:0034620; P:GO:0042026; P:GO:0051085; F:GO:0005524; F:GO:0031072; F:GO:0044183; F:GO:0051082; F:GO:0051787; C:GO:0005788	P:cellular response to unfolded protein; P:protein refolding; P:chaperone cofactor-dependent protein refolding; F:ATP binding; F:heat shock protein binding; F:protein folding chaperone; F:unfolded protein binding; F:misfolded protein binding; C:endoplasmic reticulum lumen
71	G8D593_SOLLC	G8D593	UniRef90_P31181	Cluster: Ribulose bisphosphate carboxylase large chain (Fragment)	UniProtKB Reviewed (Swiss-Prot); UniProtKB Unreviewed (TrEMBL); UniParc	1287	Camellia sinensis (Tea); Malus domestica (Apple); Icacina mannii; Euphorbia characias (Albanian spurge); Buxus sempervirens (Common box); Euphorbia dulcis (Sweet spurge); Euphorbia esula (Leafy spurge); Capsicum annuum (Capsicum pepper); Vigna unguiculata subsp. unguiculata (Cowpea); Mercurialis annua (Annual mercury); Rhamnus cathartica (Common buckthorn); Ribes americanum (American black curran…		ribulose-1,5-bisphosphate carboxylase/oxygenase large subunit	21874	16177.2	9	16	54.5918	1.6993	202	29.4239	true	[BLASTED, MAPPED, ANNOTATED]	tr|G8D593|G8D593_SOLLC	Ribulose bisphosphate carboxylase large chain (Fragment) OS=Solanum lycopersicum OX=4081 GN=rbcL PE=3 SV=1	196	20	5.79856e-142	99.59	6	P:GO:0009853; P:GO:0019253; F:GO:0000287; F:GO:0004497; F:GO:0016984; C:GO:0009507	P:photorespiration; P:reductive pentose-phosphate cycle; F:magnesium ion binding; F:monooxygenase activity; F:ribulose-bisphosphate carboxylase activity; C:chloroplast	EC:4.1.1.39; EC:1	Ribulose-bisphosphate carboxylase; Oxidoreductases
72	Q38JD4_SOLLC	Q38JD4	UniRef90_Q38JD4	Cluster: Temperature-induced lipocalin	UniProtKB Unreviewed (TrEMBL); UniParc	8	Solanum lycopersicum (Tomato); Solanum chilense (Tomato); Solanum tuberosum (Potato); Solanum chacoense (Chaco potato)		temperature-induced lipocalin	21451	11110.4	9	18	41.6216	1.2216	171	24.0899	true	[BLASTED, MAPPED, ANNOTATED]	tr|Q38JD4|Q38JD4_SOLLC	Temperature-induced lipocalin OS=Solanum lycopersicum OX=4081 GN=TIL PE=2 SV=1	185	20	3.68952e-134	94.18	4	P:GO:0000302; P:GO:0006629; F:GO:0052662; C:GO:0005737	P:response to reactive oxygen species; P:lipid metabolic process; F:zeaxanthin epoxidase activity; C:cytoplasm	EC:1.14.15.21	Zeaxanthin epoxidase
73	PME1_SOLLC	P14280	UniRef90_P14280	Cluster: Pectinesterase 1	UniProtKB Reviewed (Swiss-Prot); UniProtKB Unreviewed (TrEMBL); UniParc	5	Solanum lycopersicum (Tomato); Solanum chilense (Tomato); Solanum pennellii		pectinesterase 2.1	60027	11018.6	9	46	24.5421	2.4293	347	30.0845	true	[BLASTED, MAPPED, ANNOTATED]	sp|P14280|PME1_SOLLC	Pectinesterase 1 OS=Solanum lycopersicum OX=4081 GN=PME1.9 PE=1 SV=5	546	20	0	91.13	10	P:GO:0009835; P:GO:0042545; P:GO:0043086; P:GO:0045490; F:GO:0030599; F:GO:0045330; F:GO:0046910; C:GO:0005576; C:GO:0005618; C:GO:0016021	P:fruit ripening; P:cell wall modification; P:negative regulation of catalytic activity; P:pectin catabolic process; F:pectinesterase activity; F:aspartyl esterase activity; F:pectinesterase inhibitor activity; C:extracellular region; C:cell wall; C:integral component of membrane	EC:3.1.1.11	Pectinesterase
74	A0A3Q7JLN4_SOLLC	A0A3Q7JLN4	UniRef90_A0A3Q7JLN4	Cluster: ATP synthase subunit alpha, mitochondrial	UniProtKB Unreviewed (TrEMBL)	1	Solanum lycopersicum (Tomato)		ATP synthase subunit 1	35905	10015	9	30	27.8443	3.2576	208	26.3668	true	[BLASTED, MAPPED, ANNOTATED]	tr|A0A3Q7JLN4|A0A3Q7JLN4_SOLLC	Uncharacterized protein OS=Solanum lycopersicum OX=4081 PE=3 SV=1	334	20	2.49643e-173	90.19	7	P:GO:0015986; F:GO:0005524; F:GO:0043531; F:GO:0046933; C:GO:0005743; C:GO:0009507; C:GO:0045261	P:ATP synthesis coupled proton transport; F:ATP binding; F:ADP binding; F:proton-transporting ATP synthase activity, rotational mechanism; C:mitochondrial inner membrane; C:chloroplast; C:proton-transporting ATP synthase complex, catalytic core F(1)	EC:7.1.2.2; EC:6	H(+)-transporting two-sector ATPase; Ligases
75	A0A0U1ZGK5_9SOLN	A0A0U1ZGK5	UniRef90_Q2MIB5	Cluster: ATP synthase subunit alpha, chloroplastic	UniProtKB Reviewed (Swiss-Prot); UniProtKB Unreviewed (TrEMBL); UniParc	93	Solanum lycopersicum (Tomato); Solanum bulbocastanum (Wild potato); Solanum tuberosum (Potato); Solanum violaceimarmoratum; Solanum megistacrolobum; Solanum avilesii; Solanum stenotomum subsp. goniocalyx; Solanum tarijense; Solanum phureja; Solanum ambosinum; Solanum spegazzinii; Solanum bukasovii f. multidissectum; Solanum vernei; Solanum stenotomum; Solanum sogarandinum; Solanum pimpinellifoliu…		AtpA	55377	9460.5	9	36	20.1183	23.3246	207	29.042	true	[BLASTED, MAPPED, ANNOTATED]	tr|A0A0U1ZGK5|A0A0U1ZGK5_9SOLN	ATP synthase subunit alpha_ chloroplastic OS=Solanum neorickii OX=62891 GN=atpA PE=3 SV=1	507	20	0	99.88	7	P:GO:0015986; F:GO:0005524; F:GO:0043531; F:GO:0046933; F:GO:0046961; C:GO:0009535; C:GO:0045261	P:ATP synthesis coupled proton transport; F:ATP binding; F:ADP binding; F:proton-transporting ATP synthase activity, rotational mechanism; F:proton-transporting ATPase activity, rotational mechanism; C:chloroplast thylakoid membrane; C:proton-transporting ATP synthase complex, catalytic core F(1)	EC:7.1.3.1; EC:7.1.2.2; EC:6	H(+)-exporting diphosphatase; H(+)-transporting two-sector ATPase; Ligases
76	A0A3Q7ENV3_SOLLC	A0A3Q7ENV3	UniRef90_A0A3Q7ENV3	Cluster: Protein disulfide-isomerase	UniProtKB Unreviewed (TrEMBL); UniParc	20	Solanum lycopersicum (Tomato); Solanum chacoense (Chaco potato); Solanum tuberosum (Potato); Nicotiana tabacum (Common tobacco); Nicotiana sylvestris (Wood tobacco); Capsicum annuum (Capsicum pepper); Nicotiana attenuata (Coyote tobacco); Capsicum baccatum (Peruvian pepper); Solanum chilense (Tomato); Capsicum chinense (Scotch bonnet); Solanum pennellii; Nicotiana tomentosiformis; Solanum verruco…		probable protein disulfide-isomerase A6	39429	8583.75	9	37	37.3259	6.7755	290	30.4499	true	[BLASTED, MAPPED, ANNOTATED]	tr|A0A3Q7ENV3|A0A3Q7ENV3_SOLLC	Protein disulfide-isomerase OS=Solanum lycopersicum OX=4081 GN=101244123 PE=3 SV=1	359	20	0	95.24	2	F:GO:0003756; C:GO:0005783	F:protein disulfide isomerase activity; C:endoplasmic reticulum	EC:5.3.4.1	Protein disulfide-isomerase
77	A0A3Q7ETC3_SOLLC	A0A3Q7ETC3	UniRef90_A0A7C9EV18	Cluster: Ras-related protein Rab7	UniProtKB Unreviewed (TrEMBL); UniParc	24	Opuntia streptacantha (Prickly pear cactus); Erythranthe guttata (Yellow monkey flower); Sesamum indicum (Oriental sesame); Solanum tuberosum (Potato); Capsicum baccatum (Peruvian pepper); Solanum chacoense (Chaco potato); Solanum lycopersicum (Tomato); Solanum chilense (Tomato); Capsicum chinense (Scotch bonnet); Capsicum annuum (Capsicum pepper); Actinidia chinensis var. chinensis (Chinese soft…		Ras-related protein Rab7	22999	8332.31	9	21	51.4563	0.7315	244	33.9157	true	[BLASTED, MAPPED, ANNOTATED]	tr|A0A3Q7ETC3|A0A3Q7ETC3_SOLLC	Uncharacterized protein OS=Solanum lycopersicum OX=4081 GN=101263553 PE=4 SV=1	206	20	2.89508e-151	98.64	3	F:GO:0003924; F:GO:0005525; C:GO:0005774	F:GTPase activity; F:GTP binding; C:vacuolar membrane	EC:3.6.1	Acting on acid anhydrides
78	A0A3Q7G067_SOLLC	A0A3Q7G067	UniRef90_A0A3Q7G067	Cluster: Methyltransf_11 domain-containing protein	UniProtKB Unreviewed (TrEMBL); UniParc	8	Solanum lycopersicum (Tomato); Solanum tuberosum (Potato); Solanum chilense (Tomato); Solanum stenotomum; Solanum pennellii; Solanum verrucosum		putative methyltransferase DDB_G0268948	29904	6780.27	9	22	36.7424	0.8836	197	30.3416	true	[BLASTED, MAPPED, ANNOTATED]	tr|A0A3Q7G067|A0A3Q7G067_SOLLC	Methyltransf_11 domain-containing protein OS=Solanum lycopersicum OX=4081 GN=101256176 PE=4 SV=1	264	20	0	93.32	4	P:GO:0032259; P:GO:0046686; F:GO:0008168; C:GO:0005739	P:methylation; P:response to cadmium ion; F:methyltransferase activity; C:mitochondrion	EC:2.1.1	Transferring one-carbon groups
79	A0A3Q7GX91_SOLLC	A0A3Q7GX91	UniRef90_A0A3Q7GX91	Cluster: Mitogen-activated protein kinase	UniProtKB Unreviewed (TrEMBL); UniParc	2	Solanum lycopersicum (Tomato)		mitogen-activated protein kinase 9-like	142212	5619.4	9	105	10.6667	28.8746	304	38.5017	true	[BLASTED, MAPPED, ANNOTATED]	tr|A0A3Q7GX91|A0A3Q7GX91_SOLLC	Mitogen-activated protein kinase OS=Solanum lycopersicum OX=4081 PE=4 SV=1	1275	20	0	87.22	8	P:GO:0000165; P:GO:0006468; F:GO:0004674; F:GO:0004707; F:GO:0005524; F:GO:0106310; C:GO:0005634; C:GO:0005737	P:MAPK cascade; P:protein phosphorylation; F:protein serine/threonine kinase activity; F:MAP kinase activity; F:ATP binding; F:protein serine kinase activity; C:nucleus; C:cytoplasm	EC:2.7.11.24; EC:2.7.11.1	Mitogen-activated protein kinase; Non-specific serine/threonine protein kinase
80	A0A3Q7FPG0_SOLLC	A0A3Q7FPG0	UniRef90_A0A3Q7FPG0	Cluster: Cell division cycle protein 48 homolog	UniProtKB Unreviewed (TrEMBL); UniParc	6	Solanum lycopersicum (Tomato); Capsicum annuum (Capsicum pepper); Capsicum chinense (Scotch bonnet); Capsicum baccatum (Peruvian pepper); Solanum stenotomum		cell division cycle protein 48 homolog	92417	1868.8	9	76	16.1446	3.8445	309	36.0876	true	[BLASTED, MAPPED, ANNOTATED]	tr|A0A3Q7FPG0|A0A3Q7FPG0_SOLLC	Uncharacterized protein OS=Solanum lycopersicum OX=4081 PE=4 SV=1	830	20	0	95.8	12	P:GO:0030433; P:GO:0030970; P:GO:0051228; P:GO:0051301; P:GO:0071712; P:GO:0097352; F:GO:0005524; F:GO:0016787; F:GO:0031593; C:GO:0005634; C:GO:0005829; C:GO:0034098	P:ubiquitin-dependent ERAD pathway; P:retrograde protein transport, ER to cytosol; P:mitotic spindle disassembly; P:cell division; P:ER-associated misfolded protein catabolic process; P:autophagosome maturation; F:ATP binding; F:hydrolase activity; F:polyubiquitin modification-dependent protein binding; C:nucleus; C:cytosol; C:VCP-NPL4-UFD1 AAA ATPase complex	EC:3	Hydrolases
81	A0A3Q7FZ65_SOLLC	A0A3Q7FZ65	UniRef90_A0A3Q7FZ65	Cluster: Bet_v_1 domain-containing protein	UniProtKB Unreviewed (TrEMBL); UniParc	3	Solanum lycopersicum (Tomato); Solanum chilense (Tomato); Solanum pennellii		MLP-like protein 34	16584	11632.1	8	10	61.9048	1.1709	192	21.7859	true	[BLASTED, MAPPED, ANNOTATED]	tr|A0A3Q7FZ65|A0A3Q7FZ65_SOLLC	Bet_v_1 domain-containing protein OS=Solanum lycopersicum OX=4081 GN=101264312 PE=4 SV=1	147	20	1.12971e-101	84.2	1	P:GO:0006952	P:defense response
82	Q42874_SOLLC	Q42874	UniRef90_Q42874	Cluster: Glutamine synthetase (Fragment)	UniProtKB Unreviewed (TrEMBL)	1	Solanum lycopersicum (Tomato)		glutamine synthetase	18735	10543.6	8	13	66.474	1.911	163	33.2444	true	[BLASTED, MAPPED, ANNOTATED]	tr|Q42874|Q42874_SOLLC	Glutamine synthetase (Fragment) OS=Solanum lycopersicum OX=4081 PE=2 SV=1	173	20	6.02592e-122	99.01	5	P:GO:0006542; P:GO:0009399; F:GO:0004356; F:GO:0005524; C:GO:0005737	P:glutamine biosynthetic process; P:nitrogen fixation; F:glutamate-ammonia ligase activity; F:ATP binding; C:cytoplasm	EC:6.3.1.2	Glutamine synthetase
83	A0A3Q7EZ16_SOLLC	A0A3Q7EZ16	UniRef90_A0A3Q7EZ16	Cluster: 14_3_3 domain-containing protein	UniProtKB Unreviewed (TrEMBL); UniParc	163	Solanum lycopersicum (Tomato); Tripterygium wilfordii (Thunder God vine); Juglans regia (English walnut); Carya illinoinensis (Pecan); Castanea mollissima (Chinese chestnut); Quercus lobata (Valley oak); Carpinus fangiana; Fagus sylvatica (Beechnut); Hevea brasiliensis (Para rubber tree); Rhodamnia argentea; Jatropha curcas (Barbados nut); Manihot esculenta (Cassava); Gossypium schwendimanii (Cot…		14-3-3 protein 4	29320	8194.11	8	32	40	4.6906	216	26.6065	true	[BLASTED, MAPPED, ANNOTATED]	tr|A0A3Q7EZ16|A0A3Q7EZ16_SOLLC	14_3_3 domain-containing protein OS=Solanum lycopersicum OX=4081 GN=543791 PE=3 SV=1	260	20	0	97.82	12	P:GO:0007165; P:GO:0046686; P:GO:0090378; F:GO:0005524; F:GO:0019904; F:GO:0043130; F:GO:0046982; C:GO:0005618; C:GO:0005739; C:GO:0005794; C:GO:0005829; C:GO:0005886	P:signal transduction; P:response to cadmium ion; P:seed trichome elongation; F:ATP binding; F:protein domain specific binding; F:ubiquitin binding; F:protein heterodimerization activity; C:cell wall; C:mitochondrion; C:Golgi apparatus; C:cytosol; C:plasma membrane
84	O04891_SOLLC	O04891	UniRef90_O04891	Cluster: Glyceraldehyde-3-phosphate dehydrogenase	UniProtKB Unreviewed (TrEMBL)	1	Solanum lycopersicum (Tomato)		glyceraldehyde-3-phosphate dehydrogenase, cytosolic	31926	7319.56	8	26	35.3741	19.6866	208	32.9172	true	[BLASTED, MAPPED, ANNOTATED]	tr|O04891|O04891_SOLLC	Glyceraldehyde-3-phosphate dehydrogenase OS=Solanum lycopersicum OX=4081 GN=GAPDH PE=2 SV=1	294	20	0	97.98	6	P:GO:0006006; P:GO:0006096; F:GO:0004365; F:GO:0050661; F:GO:0051287; C:GO:0005829	P:glucose metabolic process; P:glycolytic process; F:glyceraldehyde-3-phosphate dehydrogenase (NAD+) (phosphorylating) activity; F:NADP binding; F:NAD binding; C:cytosol	EC:1.2.1.59; EC:1.2.1.12	Glyceraldehyde-3-phosphate dehydrogenase (NAD(P)(+)) (phosphorylating); Glyceraldehyde-3-phosphate dehydrogenase (phosphorylating)
85	A0A3Q7GDG7_SOLLC	A0A3Q7GDG7	UniRef90_P25858	Cluster: Glyceraldehyde-3-phosphate dehydrogenase GAPC1, cytosolic	UniProtKB Reviewed (Swiss-Prot); UniProtKB Unreviewed (TrEMBL); UniParc	253	Arabidopsis thaliana (Mouse-ear cress); Sinapis alba (White mustard); Arabidopsis suecica (Swedish thale-cress); Brassica oleracea (Wild cabbage); Eruca vesicaria subsp. sativa (Garden rocket); Braya pilosa; Brassica cretica (Mustard); Brassica napus (Rape); Brassica campestris (Field mustard); Brassica oleracea var. oleracea; Castanea mollissima (Chinese chestnut); Quercus ilex (Holly oak); Quer…		glyceraldehyde-3-phosphate dehydrogenase, cytosolic	36650	7187.71	8	28	30.7692	0.7806	184	29.3064	true	[BLASTED, MAPPED, ANNOTATED]	tr|A0A3Q7GDG7|A0A3Q7GDG7_SOLLC	Glyceraldehyde-3-phosphate dehydrogenase OS=Solanum lycopersicum OX=4081 GN=101258368 PE=3 SV=1	338	20	0	98.14	6	P:GO:0006006; P:GO:0006096; F:GO:0004365; F:GO:0050661; F:GO:0051287; C:GO:0005829	P:glucose metabolic process; P:glycolytic process; F:glyceraldehyde-3-phosphate dehydrogenase (NAD+) (phosphorylating) activity; F:NADP binding; F:NAD binding; C:cytosol	EC:1.2.1.59; EC:1.2.1.12	Glyceraldehyde-3-phosphate dehydrogenase (NAD(P)(+)) (phosphorylating); Glyceraldehyde-3-phosphate dehydrogenase (phosphorylating)
86	A0A3Q7FZ63_SOLLC	A0A3Q7FZ63	UniRef90_P53492	Cluster: Actin-7	UniProtKB Reviewed (Swiss-Prot); UniProtKB Unreviewed (TrEMBL); UniParc	1355	Arabidopsis thaliana (Mouse-ear cress); Solanum tuberosum (Potato); Oryza sativa subsp. indica (Rice); Oryza sativa subsp. japonica (Rice); Arabidopsis suecica (Swedish thale-cress); Arabidopsis thaliana x Arabidopsis arenosa; Arabidopsis arenosa (Sand rock-cress); Arabidopsis lyrata subsp. lyrata (Lyre-leaved rock-cress); Parthenium argentatum (Guayule rubber plant); Vitis vinifera (Grape); Nymp…		actin	41629	7172.61	8	38	27.321	10.8837	178	31.7366	true	[BLASTED, MAPPED, ANNOTATED]	tr|A0A3Q7FZ63|A0A3Q7FZ63_SOLLC	Uncharacterized protein OS=Solanum lycopersicum OX=4081 GN=101260631 PE=3 SV=1	377	20	0	99.88	3	F:GO:0005524; C:GO:0005737; C:GO:0005856	F:ATP binding; C:cytoplasm; C:cytoskeleton
87	A0A3Q7EQU5_SOLLC	A0A3Q7EQU5	UniRef90_P30172	Cluster: Actin-100 (Fragment)	UniProtKB Reviewed (Swiss-Prot); UniProtKB Unreviewed (TrEMBL); UniParc	18	Solanum tuberosum (Potato); Solanum chacoense (Chaco potato); Eucalyptus grandis (Flooded gum); Triticum aestivum (Wheat); Phyllostachys bambusoides (timber bamboo); Solanum lycopersicum (Tomato); Solanum chilense (Tomato); Aegilops tauschii (Tausch's goatgrass); Cuscuta australis; Brassica cretica (Mustard); Escherichia coli; Solanum pennellii		actin-101	41643	6668.56	8	38	25.9947	1.1361	134	25.0307	true	[BLASTED, MAPPED, ANNOTATED]	tr|A0A3Q7EQU5|A0A3Q7EQU5_SOLLC	Uncharacterized protein OS=Solanum lycopersicum OX=4081 GN=101250165 PE=3 SV=1	377	20	0	99.84	3	F:GO:0005524; C:GO:0005737; C:GO:0005856	F:ATP binding; C:cytoplasm; C:cytoskeleton
88	A0A3Q7J492_SOLLC	A0A3Q7J492	UniRef90_A0A3Q7J492	Cluster: FAD_binding_3 domain-containing protein	UniProtKB Unreviewed (TrEMBL); UniParc	25	Solanum lycopersicum (Tomato); Solanum chilense (Tomato); Solanum chacoense (Chaco potato); Solanum tuberosum (Potato); Solanum stenotomum; Solanum verrucosum; Solanum pennellii		FAD-dependent urate hydroxylase-like isoform X1	44546	5817.09	8	29	24.0786	2.2737	268	34.4261	true	[BLASTED, MAPPED, ANNOTATED]	tr|A0A3Q7J492|A0A3Q7J492_SOLLC	FAD_binding_3 domain-containing protein OS=Solanum lycopersicum OX=4081 GN=101247497 PE=4 SV=1	407	20	0	91.16	3	F:GO:0004497; F:GO:0071949; C:GO:0016021	F:monooxygenase activity; F:FAD binding; C:integral component of membrane	EC:1	Oxidoreductases
89	A0A3Q7GJG3_SOLLC	A0A3Q7GJG3	UniRef90_A0A8B8PHZ8	Cluster: Clathrin heavy chain	UniProtKB Unreviewed (TrEMBL); UniParc	18	Rhodamnia argentea; Senna tora; Nymphaea colorata; Solanum lycopersicum (Tomato); Mucuna pruriens (Velvet bean); Camellia sinensis (Tea); Musa acuminata subsp. malaccensis (Wild banana); Phaseolus vulgaris (Kidney bean); Vigna radiata var. radiata (Mung bean); Actinidia rufa; Capsicum annuum (Capsicum pepper); Trifolium medium; Vigna angularis; Eucalyptus grandis; Glycine soja; Erigeron canadensi…		clathrin heavy chain 1	196033	2871.8	8	153	7.4928	9.2649	789	33.4091	true	[BLASTED, MAPPED, ANNOTATED]	tr|A0A3Q7GJG3|A0A3Q7GJG3_SOLLC	Clathrin heavy chain OS=Solanum lycopersicum OX=4081 PE=3 SV=1	1735	20	0	97.58	10	P:GO:0006886; P:GO:0006898; F:GO:0005198; F:GO:0032051; C:GO:0005829; C:GO:0009506; C:GO:0009507; C:GO:0030130; C:GO:0030132; C:GO:0071439	P:intracellular protein transport; P:receptor-mediated endocytosis; F:structural molecule activity; F:clathrin light chain binding; C:cytosol; C:plasmodesma; C:chloroplast; C:clathrin coat of trans-Golgi network vesicle; C:clathrin coat of coated pit; C:clathrin complex
90	O82575_SOLLC	O82575	UniRef90_Q9ZRB6	Cluster: Ci21A protein	UniProtKB Unreviewed (TrEMBL); UniParc	36	Solanum tuberosum (Potato); Capsicum baccatum (Peruvian pepper); Capsicum chinense (Scotch bonnet); Capsicum annuum (Capsicum pepper); Solanum peruvianum (Peruvian tomato); Solanum cheesmaniae (Galapagos Island tomato); Solanum chilense (Tomato); Solanum lycopersicum (Tomato); Solanum habrochaites (Wild tomato); [Lycopersicon] peruvianum var. humifusum; Solanum lycopersicum var. cerasiforme; Sola…		ASR1 protein	12547	15791	7	11	62.7273	1.4696	206	24.8863	true	[BLASTED, MAPPED, ANNOTATED]	tr|O82575|O82575_SOLLC	Fruit-ripening protein OS=Solanum lycopersicum OX=4081 GN=543574 PE=2 SV=1	110	20	1.48813e-63	98.37	6	P:GO:0009414; P:GO:0010043; F:GO:0008270; F:GO:0042802; C:GO:0005634; C:GO:0032991	P:response to water deprivation; P:response to zinc ion; F:zinc ion binding; F:identical protein binding; C:nucleus; C:protein-containing complex
91	V5YN05_SOLLC	V5YN05	UniRef90_Q08451	Cluster: Probable aquaporin PIP-type pTOM75	UniProtKB Reviewed (Swiss-Prot); UniProtKB Unreviewed (TrEMBL); UniParc	62	Solanum lycopersicum (Tomato); Solanum chilense (Tomato); Solanum chacoense (Chaco potato); Solanum tuberosum (Potato); Capsicum baccatum (Peruvian pepper); Capsicum chinense (Scotch bonnet); Capsicum annuum (Capsicum pepper); Nicotiana attenuata (Coyote tobacco); Nicotiana sylvestris (Wood tobacco); Nicotiana tabacum (Common tobacco); Nicotiana tomentosiformis (Tobacco); Nicotiana excelsior; Lyc…		probable aquaporin PIP-type pTOM75	30732	11722.2	7	22	17.4825	24.7946	263	27.89	true	[BLASTED, MAPPED, ANNOTATED]	tr|V5YN05|V5YN05_SOLLC	Plasmamembrane intrinsic protein 15 OS=Solanum lycopersicum OX=4081 GN=PIP1;5 PE=2 SV=1	286	20	0	98.49	8	P:GO:0006833; P:GO:0009414; P:GO:0055085; F:GO:0015250; C:GO:0005773; C:GO:0005886; C:GO:0009506; C:GO:0016021	P:water transport; P:response to water deprivation; P:transmembrane transport; F:water channel activity; C:vacuole; C:plasma membrane; C:plasmodesma; C:integral component of membrane	EC:7	Translocases
92	A0A3Q7EYI3_SOLLC	A0A3Q7EYI3	UniRef90_A0A3Q7EYI3	Cluster: Fe2OG dioxygenase domain-containing protein	UniProtKB Unreviewed (TrEMBL)	2	Solanum lycopersicum (Tomato); Solanum chilense (Tomato)		probable 2-oxoglutarate-dependent dioxygenase AOP1	22545	7561.39	7	16	52.9703	2.8824	201	37.1003	true	[BLASTED, MAPPED, ANNOTATED]	tr|A0A3Q7EYI3|A0A3Q7EYI3_SOLLC	Fe2OG dioxygenase domain-containing protein OS=Solanum lycopersicum OX=4081 PE=3 SV=1	202	20	1.64759e-140	90.87	3	F:GO:0031418; F:GO:0046872; F:GO:0051213	F:L-ascorbic acid binding; F:metal ion binding; F:dioxygenase activity	EC:1	Oxidoreductases
93	A0A3Q7ILI4_SOLLC	A0A3Q7ILI4	UniRef90_P81228	Cluster: Actin-66 (Fragment)	UniProtKB Reviewed (Swiss-Prot); UniProtKB Unreviewed (TrEMBL); UniParc	46	Solanum tuberosum (Potato); Solanum chacoense (Chaco potato); Solanum lycopersicum (Tomato); Solanum chilense (Tomato); Lupinus albus (White lupine); Catharanthus roseus (Madagascar periwinkle); Salvia splendens (Scarlet sage); Nicotiana tabacum (Common tobacco); Nicotiana sylvestris (Wood tobacco); Morella rubra; Erythranthe guttata (Yellow monkey flower); Lotus japonicus (Lotus corniculatus var…		actin	41707	6894.11	7	38	24.6684	4.7299	153	27.3072	true	[BLASTED, MAPPED, ANNOTATED]	tr|A0A3Q7ILI4|A0A3Q7ILI4_SOLLC	Uncharacterized protein OS=Solanum lycopersicum OX=4081 GN=101263261 PE=3 SV=1	377	20	0	99.88	3	F:GO:0005524; C:GO:0005737; C:GO:0005856	F:ATP binding; C:cytoplasm; C:cytoskeleton
94	DCHS_SOLLC	P54772	UniRef90_P54772	Cluster: Histidine decarboxylase	UniProtKB Reviewed (Swiss-Prot); UniProtKB Unreviewed (TrEMBL); UniParc	4	Solanum lycopersicum (Tomato); Solanum pennellii		histidine decarboxylase-like	47597	6841.76	7	38	25.6659	3.117	215	34.3175	true	[BLASTED, MAPPED, ANNOTATED]	sp|P54772|DCHS_SOLLC	Histidine decarboxylase OS=Solanum lycopersicum OX=4081 GN=HDC PE=2 SV=1	413	20	0	89.53	3	P:GO:0019752; F:GO:0004398; F:GO:0030170	P:carboxylic acid metabolic process; F:histidine decarboxylase activity; F:pyridoxal phosphate binding	EC:4.1.1.22	Histidine decarboxylase
95	RAN1_SOLLC	P38546	UniRef90_Q8H156	Cluster: GTP-binding nuclear protein Ran-3	UniProtKB Reviewed (Swiss-Prot); UniProtKB Unreviewed (TrEMBL); UniParc	15	Arabidopsis thaliana (Mouse-ear cress); Solanum lycopersicum (Tomato); Arabidopsis thaliana x Arabidopsis arenosa; Arabidopsis suecica (Swedish thale-cress); Oryza nivara (Indian wild rice); Solanum tuberosum (Potato); Solanum chilense (Tomato); Arabis nemorensis; Morella rubra; Solanum chacoense (Chaco potato); Cajanus cajan; Tarenaya hassleriana		GTP-binding nuclear protein Ran-3-like	25169	6737.84	7	19	39.819	13.5035	222	34.6591	true	[BLASTED, MAPPED, ANNOTATED]	sp|P38546|RAN1_SOLLC	GTP-binding nuclear protein Ran1 OS=Solanum lycopersicum OX=4081 GN=RAN1 PE=2 SV=1	221	20	2.32559e-165	97.85	7	P:GO:0000054; P:GO:0006606; F:GO:0003924; F:GO:0005525; F:GO:0016829; C:GO:0005634; C:GO:0005737	P:ribosomal subunit export from nucleus; P:protein import into nucleus; F:GTPase activity; F:GTP binding; F:lyase activity; C:nucleus; C:cytoplasm	EC:3.6.1; EC:4	Acting on acid anhydrides; Lyases
96	A0A3Q7FVM4_SOLLC	A0A3Q7FVM4	UniRef90_A0A1S4C5D8	Cluster: ras-related protein Rab7-like	UniProtKB Unreviewed (TrEMBL); UniParc	24	Nicotiana tabacum (Common tobacco); Nicotiana attenuata (Coyote tobacco); Nicotiana sylvestris (Wood tobacco); Papaver somniferum (Opium poppy); Nicotiana benthamiana; Capsicum annuum (Capsicum pepper); Capsicum baccatum (Peruvian pepper); Capsicum chinense (Scotch bonnet); Solanum tuberosum (Potato); Solanum lycopersicum (Tomato); Solanum chilense (Tomato); Solanum chacoense (Chaco potato); Olea…		ras-related protein Rab7	22954	6348.49	7	21	34.1463	4.3478	162	38.4071	true	[BLASTED, MAPPED, ANNOTATED]	tr|A0A3Q7FVM4|A0A3Q7FVM4_SOLLC	Uncharacterized protein OS=Solanum lycopersicum OX=4081 GN=101261599 PE=4 SV=1	205	20	5.90685e-151	98.76	3	F:GO:0003924; F:GO:0005525; C:GO:0005774	F:GTPase activity; F:GTP binding; C:vacuolar membrane	EC:3.6.1	Acting on acid anhydrides
97	Q9SXS0_SOLLC	Q9SXS0	UniRef90_A0A3Q7J9P2	Cluster: WD_REPEATS_REGION domain-containing protein	UniProtKB Unreviewed (TrEMBL); UniParc	20	Solanum lycopersicum (Tomato); Solanum chilense (Tomato); Solanum tuberosum (Potato); Solanum chacoense (Chaco potato); Solanum stenotomum; Solanum verrucosum		guanine nucleotide-binding protein subunit beta-like protein	35793	5032.96	7	31	28.5276	27.1147	211	37.3366	true	[BLASTED, MAPPED, ANNOTATED]	tr|Q9SXS0|Q9SXS0_SOLLC	LeArcA2 protein OS=Solanum lycopersicum OX=4081 GN=LeArcA2 PE=2 SV=1	326	20	0	96.84	7	P:GO:0001934; P:GO:0072344; F:GO:0005080; F:GO:0016301; F:GO:0043022; C:GO:0005634; C:GO:0005829	P:positive regulation of protein phosphorylation; P:rescue of stalled ribosome; F:protein kinase C binding; F:kinase activity; F:ribosome binding; C:nucleus; C:cytosol	EC:2.7	Transferring phosphorus-containing groups
98	A0A3Q7GAX9_SOLLC	A0A3Q7GAX9	UniRef90_A0A3Q7GAX9	Cluster: Fructose-bisphosphate aldolase	UniProtKB Unreviewed (TrEMBL); UniParc	7	Solanum lycopersicum (Tomato); Solanum chilense (Tomato); Macleaya cordata; Papaver somniferum (Opium poppy); Rhamnella rubrinervis; Solanum pennellii		fructose-bisphosphate aldolase 3, chloroplastic	43040	4589.18	7	34	26.8354	6.3693	251	34.5478	true	[BLASTED, MAPPED, ANNOTATED]	tr|A0A3Q7GAX9|A0A3Q7GAX9_SOLLC	Fructose-bisphosphate aldolase OS=Solanum lycopersicum OX=4081 GN=101264821 PE=3 SV=1	395	20	0	96.4	9	P:GO:0006096; P:GO:0006979; P:GO:0030388; P:GO:0046686; F:GO:0004332; C:GO:0005739; C:GO:0005829; C:GO:0009534; C:GO:0010287	P:glycolytic process; P:response to oxidative stress; P:fructose 1,6-bisphosphate metabolic process; P:response to cadmium ion; F:fructose-bisphosphate aldolase activity; C:mitochondrion; C:cytosol; C:chloroplast thylakoid; C:plastoglobule	EC:4.1.2.13	Fructose-bisphosphate aldolase
99	A0A3Q7J1U2_SOLLC	A0A3Q7J1U2	UniRef90_A0A3Q7J1U2	Cluster: Vicilin-like seed storage protein At2g18540	UniProtKB Unreviewed (TrEMBL); UniParc	11	Solanum lycopersicum (Tomato); Solanum demissum (Wild potato); Solanum chilense (Tomato); Solanum tuberosum (Potato); Solanum pennellii; Solanum verrucosum; Solanum stenotomum		vicilin-like seed storage protein At2g28490	57117	4484.46	7	44	15.4599	29.2455	224	30.4152	true	[BLASTED]	tr|A0A3Q7J1U2|A0A3Q7J1U2_SOLLC	Uncharacterized protein OS=Solanum lycopersicum OX=4081 GN=101246214 PE=4 SV=1	511	20	0	88.78
100	A0A3Q7E9M8_SOLLC	A0A3Q7E9M8	UniRef90_A0A3Q7E9M8	Cluster: ADP-ribosylation factor 2	UniProtKB Unreviewed (TrEMBL)	1	Solanum lycopersicum (Tomato)		ADP-ribosylation factor 2	24147	18690.4	6	19	44.9761	5.4446	195	29.7001	true	[BLASTED, MAPPED, ANNOTATED]	tr|A0A3Q7E9M8|A0A3Q7E9M8_SOLLC	Uncharacterized protein OS=Solanum lycopersicum OX=4081 PE=3 SV=1	209	20	1.25204e-130	97.44	3	F:GO:0003924; F:GO:0005525; C:GO:0009507	F:GTPase activity; F:GTP binding; C:chloroplast	EC:3.6.1	Acting on acid anhydrides
101	A0A3Q7GNF0_SOLLC	A0A3Q7GNF0	UniRef90_A0A3Q7GNF0	Cluster: Usp domain-containing protein	UniProtKB Unreviewed (TrEMBL); UniParc	9	Solanum lycopersicum (Tomato); Solanum chacoense (Chaco potato); Solanum tuberosum (Potato); Solanum stenotomum; Solanum verrucosum; Solanum pennellii		universal stress protein PHOS34	17472	12718.1	6	12	47.205	1.4244	162	35.6064	true	[BLASTED]	tr|A0A3Q7GNF0|A0A3Q7GNF0_SOLLC	Usp domain-containing protein OS=Solanum lycopersicum OX=4081 GN=101256975 PE=4 SV=1	161	20	8.80581e-113	89.07
102	A0A3Q7IA99_SOLLC	A0A3Q7IA99	UniRef90_M1CCB0	Cluster: NAD(P)H dehydrogenase (quinone)	UniProtKB Unreviewed (TrEMBL); UniParc	23	Solanum tuberosum (Potato); Solanum chacoense (Chaco potato); Capsicum baccatum (Peruvian pepper); Capsicum chinense (Scotch bonnet); Solanum lycopersicum (Tomato); Solanum chilense (Tomato); Nicotiana tabacum (Common tobacco); Capsicum annuum (Capsicum pepper); Gossypium davidsonii (Davidson's cotton); Gossypium harknessii; Gossypium trilobum; Gossypium klotzschianum; Solanum stenotomum; Ipomoea…		probable NAD(P)H dehydrogenase (quinone) FQR1-like 1	21654	9529.87	6	14	38.4236	1.1162	148	32.5388	true	[BLASTED, MAPPED, ANNOTATED]	tr|A0A3Q7IA99|A0A3Q7IA99_SOLLC	NAD(P)H dehydrogenase (quinone) OS=Solanum lycopersicum OX=4081 GN=101245803 PE=3 SV=1	203	20	3.06354e-144	97.31	5	F:GO:0008753; F:GO:0010181; F:GO:0050136; C:GO:0005886; C:GO:0009506	F:NADPH dehydrogenase (quinone) activity; F:FMN binding; F:NADH dehydrogenase (quinone) activity; C:plasma membrane; C:plasmodesma	EC:1.6.5.10; EC:1.6.5.11; EC:1.6.5.2	NADPH dehydrogenase (quinone); NADH dehydrogenase (quinone); NAD(P)H dehydrogenase (quinone)
103	A0A3Q7IAT1_SOLLC	A0A3Q7IAT1	UniRef90_A0A3Q7IAT1	Cluster: Plasma membrane-associated cation-binding protein 1	UniProtKB Unreviewed (TrEMBL); UniParc	5	Solanum lycopersicum (Tomato); Solanum chilense (Tomato); Solanum pennellii; Solanum stenotomum; Solanum verrucosum		plasma membrane-associated cation-binding protein 1	21918	9227.07	6	29	50.7463	24.575	208	29.2183	true	[BLASTED, MAPPED, ANNOTATED]	tr|A0A3Q7IAT1|A0A3Q7IAT1_SOLLC	Uncharacterized protein OS=Solanum lycopersicum OX=4081 GN=101260974 PE=4 SV=1	201	20	7.00004e-135	87.22	1	C:GO:0046658	C:anchored component of plasma membrane
104	FSPM_SOLLC	P14903	UniRef90_P14903	Cluster: Fruit-specific protein	UniProtKB Reviewed (Swiss-Prot); UniProtKB Unreviewed (TrEMBL)	3	Solanum lycopersicum (Tomato); Solanum chilense (Tomato)		metallocarboxypeptidase inhibitor	10691	8095.99	6	8	17.7083	1.9495	98	17.0034	true	[BLASTED, MAPPED, ANNOTATED]	sp|P14903|FSPM_SOLLC	Fruit-specific protein OS=Solanum lycopersicum OX=4081 GN=2A11 PE=1 SV=1	96	20	2.40651e-63	81.86	2	P:GO:0006508; F:GO:0004180	P:proteolysis; F:carboxypeptidase activity	EC:3.4	Acting on peptide bonds (peptidases)
105	A0A3Q7J2X1_SOLLC	A0A3Q7J2X1	UniRef90_M0ZHN3	Cluster: Malic enzyme	UniProtKB Unreviewed (TrEMBL); UniParc	10	Solanum tuberosum (Potato); Solanum chilense (Tomato); Solanum lycopersicum (Tomato); Solanum verrucosum; Solanum stenotomum; Solanum pennellii		NADP-dependent malic enzyme	62643	7482.3	6	50	12.1479	2.8039	144	34.494	true	[BLASTED, MAPPED, ANNOTATED]	tr|A0A3Q7J2X1|A0A3Q7J2X1_SOLLC	Malic enzyme OS=Solanum lycopersicum OX=4081 PE=3 SV=1	568	20	0	95.41	8	P:GO:0006090; P:GO:0006108; F:GO:0004471; F:GO:0004473; F:GO:0046872; F:GO:0051287; C:GO:0009507; C:GO:0016021	P:pyruvate metabolic process; P:malate metabolic process; F:malate dehydrogenase (decarboxylating) (NAD+) activity; F:malate dehydrogenase (decarboxylating) (NADP+) activity; F:metal ion binding; F:NAD binding; C:chloroplast; C:integral component of membrane	EC:1.1.1.38; EC:1.1.1.39; EC:1.1.1.40	Malate dehydrogenase (oxaloacetate-decarboxylating); Malate dehydrogenase (decarboxylating); Malate dehydrogenase (oxaloacetate-decarboxylating) (NADP(+))
106	A0A3Q7INM1_SOLLC	A0A3Q7INM1	UniRef90_P30169	Cluster: Actin-75	UniProtKB Reviewed (Swiss-Prot); UniProtKB Unreviewed (TrEMBL)	13	Solanum tuberosum (Potato); Solanum chacoense (Chaco potato); Solanum lycopersicum (Tomato); Solanum chilense (Tomato); Capsicum chinense (Scotch bonnet); Capsicum annuum (Capsicum pepper); Nicotiana sylvestris (Wood tobacco); Nicotiana tabacum (Common tobacco); Nicotiana attenuata (Coyote tobacco); Capsicum baccatum (Peruvian pepper)		actin-75	41659	6148.51	6	38	20.4244	10.0279	155	33.1217	true	[BLASTED, MAPPED, ANNOTATED]	tr|A0A3Q7INM1|A0A3Q7INM1_SOLLC	Uncharacterized protein OS=Solanum lycopersicum OX=4081 GN=101255046 PE=3 SV=1	377	20	0	99.06	3	F:GO:0005524; C:GO:0005737; C:GO:0005856	F:ATP binding; C:cytoplasm; C:cytoskeleton
107	A0A3Q7FXP7_SOLLC	A0A3Q7FXP7	UniRef90_A0A1S3ZPN7	Cluster: Glutamine synthetase	UniProtKB Unreviewed (TrEMBL); UniParc	19	Nicotiana tabacum (Common tobacco); Nicotiana attenuata (Coyote tobacco); Solanum tuberosum (Potato); Solanum lycopersicum (Tomato); Solanum chilense (Tomato); Capsicum chinense (Scotch bonnet); Capsicum annuum (Capsicum pepper); Nicotiana sylvestris (Wood tobacco); Capsicum baccatum (Peruvian pepper); Nicotiana tomentosiformis; Solanum pennellii; Solanum stenotomum; Solanum verrucosum		glutamine synthetase cytosolic isozyme 1-1	39185	6144.19	6	28	17.1348	1.5163	106	30.2796	true	[BLASTED, MAPPED, ANNOTATED]	tr|A0A3Q7FXP7|A0A3Q7FXP7_SOLLC	Glutamine synthetase OS=Solanum lycopersicum OX=4081 GN=543756 PE=3 SV=1	356	20	0	98.19	4	P:GO:0006542; F:GO:0004356; F:GO:0005524; C:GO:0005737	P:glutamine biosynthetic process; F:glutamate-ammonia ligase activity; F:ATP binding; C:cytoplasm	EC:6.3.1.2	Glutamine synthetase
108	PME22_SOLLC	Q96575	UniRef90_P14280	Cluster: Pectinesterase 1	UniProtKB Reviewed (Swiss-Prot); UniProtKB Unreviewed (TrEMBL); UniParc	5	Solanum lycopersicum (Tomato); Solanum chilense (Tomato); Solanum pennellii		pectinesterase 2.1	60386	5509.85	6	44	14.1818	2.0434	179	25.3877	true	[BLASTED, MAPPED, ANNOTATED]	sp|Q96575|PME22_SOLLC	Pectinesterase 2.2 OS=Solanum lycopersicum OX=4081 GN=PME2.2 PE=3 SV=1	550	20	0	92.38	10	P:GO:0009835; P:GO:0042545; P:GO:0043086; P:GO:0045490; F:GO:0030599; F:GO:0045330; F:GO:0046910; C:GO:0005576; C:GO:0005618; C:GO:0016021	P:fruit ripening; P:cell wall modification; P:negative regulation of catalytic activity; P:pectin catabolic process; F:pectinesterase activity; F:aspartyl esterase activity; F:pectinesterase inhibitor activity; C:extracellular region; C:cell wall; C:integral component of membrane	EC:3.1.1.11	Pectinesterase
109	A0A3Q7IS88_SOLLC	A0A3Q7IS88	UniRef90_A0A3Q7IS88	Cluster: PEROXIDASE_4 domain-containing protein	UniProtKB Unreviewed (TrEMBL); UniParc	17	Solanum lycopersicum (Tomato); Nicotiana tabacum (Common tobacco); Solanum chacoense (Chaco potato); Solanum tuberosum (Potato); Nicotiana attenuata (Coyote tobacco); Nicotiana sylvestris (Wood tobacco); Capsicum annuum (Capsicum pepper); Capsicum baccatum (Peruvian pepper); Capsicum chinense (Scotch bonnet); Solanum chilense (Tomato); Solanum verrucosum; Solanum pennellii; Nicotiana tomentosifor…		L-ascorbate peroxidase 2, cytosolic	27618	5404.95	6	27	31.6	1.9953	131	25.7556	true	[BLASTED, MAPPED, ANNOTATED]	tr|A0A3Q7IS88|A0A3Q7IS88_SOLLC	PEROXIDASE_4 domain-containing protein OS=Solanum lycopersicum OX=4081 GN=101258987 PE=3 SV=1	250	20	0	98.55	9	P:GO:0000302; P:GO:0034599; P:GO:0042744; P:GO:0098869; F:GO:0016688; F:GO:0020037; F:GO:0046872; C:GO:0005576; C:GO:0009507	P:response to reactive oxygen species; P:cellular response to oxidative stress; P:hydrogen peroxide catabolic process; P:cellular oxidant detoxification; F:L-ascorbate peroxidase activity; F:heme binding; F:metal ion binding; C:extracellular region; C:chloroplast	EC:1.11.1.11	L-ascorbate peroxidase
110	A0A3Q7J3G4_SOLLC	A0A3Q7J3G4	UniRef90_P29677	Cluster: Mitochondrial-processing peptidase subunit alpha	UniProtKB Reviewed (Swiss-Prot); UniProtKB Unreviewed (TrEMBL); UniParc	20	Solanum tuberosum (Potato); Solanum chacoense (Chaco potato); Capsicum annuum (Capsicum pepper); Capsicum chinense (Scotch bonnet); Capsicum baccatum (Peruvian pepper); Nicotiana attenuata (Coyote tobacco); Nicotiana tabacum (Common tobacco); Nicotiana sylvestris (Wood tobacco); Solanum lycopersicum (Tomato); Solanum chilense (Tomato); Solanum pennellii; Solanum verrucosum; Nicotiana tomentosifor…		mitochondrial-processing peptidase subunit alpha	54640	4192.97	6	32	23.0159	0.9728	225	27.6867	true	[BLASTED, MAPPED, ANNOTATED]	tr|A0A3Q7J3G4|A0A3Q7J3G4_SOLLC	Alpha-MPP OS=Solanum lycopersicum OX=4081 GN=101262892 PE=3 SV=1	504	20	0	93.99	9	P:GO:0006627; P:GO:0022900; P:GO:1902600; F:GO:0004222; F:GO:0008121; F:GO:0046872; C:GO:0005743; C:GO:0005759; C:GO:0070469	P:protein processing involved in protein targeting to mitochondrion; P:electron transport chain; P:proton transmembrane transport; F:metalloendopeptidase activity; F:ubiquinol-cytochrome-c reductase activity; F:metal ion binding; C:mitochondrial inner membrane; C:mitochondrial matrix; C:respirasome	EC:3.4.24; EC:1.10; EC:7.1.1.8	Acting on peptide bonds (peptidases); Acting on diphenols and related substances as donors; Quinol--cytochrome-c reductase
111	A0A3Q7FRA5_SOLLC	A0A3Q7FRA5	UniRef90_P09094	Cluster: Glyceraldehyde-3-phosphate dehydrogenase, cytosolic (Fragment)	UniProtKB Reviewed (Swiss-Prot); UniProtKB Unreviewed (TrEMBL); UniParc	28	Nicotiana tabacum (Common tobacco); Capsicum annuum (Capsicum pepper); Solanum lycopersicum (Tomato); Capsicum chinense (Scotch bonnet); Salvia miltiorrhiza (Chinese sage); Capsicum baccatum (Peruvian pepper); Codonopsis pilosula; Solanum chilense (Tomato); Erythranthe guttata (Yellow monkey flower); Handroanthus impetiginosus; Nepeta rtanjensis; Atropa belladonna (Belladonna); Davidia involucrat…		glyceraldehyde-3-phosphate dehydrogenase, cytosolic-like	38430	4112.51	6	33	23.2295	1.9669	169	29.8527	true	[BLASTED, MAPPED, ANNOTATED]	tr|A0A3Q7FRA5|A0A3Q7FRA5_SOLLC	Glyceraldehyde-3-phosphate dehydrogenase OS=Solanum lycopersicum OX=4081 PE=3 SV=1	353	20	0	99.06	6	P:GO:0006006; P:GO:0006096; F:GO:0004365; F:GO:0050661; F:GO:0051287; C:GO:0005829	P:glucose metabolic process; P:glycolytic process; F:glyceraldehyde-3-phosphate dehydrogenase (NAD+) (phosphorylating) activity; F:NADP binding; F:NAD binding; C:cytosol	EC:1.2.1.59; EC:1.2.1.12	Glyceraldehyde-3-phosphate dehydrogenase (NAD(P)(+)) (phosphorylating); Glyceraldehyde-3-phosphate dehydrogenase (phosphorylating)
112	Q6IV07_SOLLC	Q6IV07	UniRef90_Q8RU27	Cluster: Probable UDP-arabinopyranose mutase 2	UniProtKB Reviewed (Swiss-Prot); UniProtKB Unreviewed (TrEMBL); UniParc	33	Solanum tuberosum (Potato); Nicotiana attenuata (Coyote tobacco); Carpinus fangiana; Nicotiana tabacum (Common tobacco); Nicotiana sylvestris (Wood tobacco); Solanum chacoense (Chaco potato); Fagus sylvatica (Beechnut); Juglans regia (English walnut); Solanum lycopersicum (Tomato); Solanum chilense (Tomato); Quercus lobata (Valley oak); Castanea mollissima (Chinese chestnut); Lotus japonicus (Lot…		Alpha-1,4-glucan-protein synthase [UDP-forming] 2	41165	3927.54	6	38	20.7182	2.3114	215	35.647	true	[BLASTED, MAPPED, ANNOTATED]	tr|Q6IV07|Q6IV07_SOLLC	UDP-arabinopyranose mutase OS=Solanum lycopersicum OX=4081 GN=543938 PE=2 SV=1	362	20	0	98.07	11	P:GO:0006486; P:GO:0009832; P:GO:0030244; P:GO:0033356; P:GO:0071555; F:GO:0052691; C:GO:0005576; C:GO:0005618; C:GO:0005794; C:GO:0005829; C:GO:0009506	P:protein glycosylation; P:plant-type cell wall biogenesis; P:cellulose biosynthetic process; P:UDP-L-arabinose metabolic process; P:cell wall organization; F:UDP-arabinopyranose mutase activity; C:extracellular region; C:cell wall; C:Golgi apparatus; C:cytosol; C:plasmodesma	EC:5.4.99.30	UDP-arabinopyranose mutase
113	A0A3Q7HGC8_SOLLC	A0A3Q7HGC8	UniRef90_A0A3Q7HGC8	Cluster: Chaperonin Cpn	UniProtKB Unreviewed (TrEMBL); UniParc	12	Solanum lycopersicum (Tomato); Solanum chilense (Tomato); Nicotiana tabacum (Common tobacco); Nicotiana sylvestris (Wood tobacco); Nicotiana attenuata (Coyote tobacco); Solanum tuberosum (Potato); Capsicum baccatum (Peruvian pepper); Capsicum annuum (Capsicum pepper); Solanum stenotomum; Solanum verrucosum		chaperonin CPN60-2, mitochondrial	61088	3017.31	6	52	10.9948	1.5912	292	34.0242	true	[BLASTED, MAPPED, ANNOTATED]	tr|A0A3Q7HGC8|A0A3Q7HGC8_SOLLC	Uncharacterized protein OS=Solanum lycopersicum OX=4081 GN=101263320 PE=3 SV=1	573	20	0	97.65	10	P:GO:0042026; F:GO:0003723; F:GO:0005507; F:GO:0005524; C:GO:0005739; C:GO:0005774; C:GO:0005829; C:GO:0005886; C:GO:0009570; C:GO:0009941	P:protein refolding; F:RNA binding; F:copper ion binding; F:ATP binding; C:mitochondrion; C:vacuolar membrane; C:cytosol; C:plasma membrane; C:chloroplast stroma; C:chloroplast envelope
114	A0A3Q7IBA0_SOLLC	A0A3Q7IBA0	UniRef90_Q8H159	Cluster: Polyubiquitin 10	UniProtKB Reviewed (Swiss-Prot); UniProtKB Unreviewed (TrEMBL); UniParc	56	Arabidopsis thaliana (Mouse-ear cress); Nicotiana sylvestris (Wood tobacco); Prunus persica (Peach); Pisum sativum (Garden pea); Arachis duranensis (Wild peanut); Prunus armeniaca (Apricot); Citrus clementina (Clementine); Glycine soja (Wild soybean); Arachis hypogaea (Peanut); Citrus sinensis (Sweet orange); Arabidopsis thaliana x Arabidopsis arenosa; Gossypium raimondii (New World cotton); Viti…		polyubiquitin-like isoform X1	51174	20933.1	5	54	11.5974	0.5694	102	19.3197	true	[BLASTED, MAPPED, ANNOTATED]	tr|A0A3Q7IBA0|A0A3Q7IBA0_SOLLC	Uncharacterized protein OS=Solanum lycopersicum OX=4081 GN=101256039 PE=4 SV=1	457	20	0	99.98	19	P:GO:0006281; P:GO:0006468; P:GO:0016567; P:GO:0019941; P:GO:0090305; F:GO:0004527; F:GO:0004674; F:GO:0005524; F:GO:0008081; F:GO:0016616; F:GO:0031386; F:GO:0031625; F:GO:0051287; F:GO:0106310; C:GO:0000781; C:GO:0005634; C:GO:0005737; C:GO:0005840; C:GO:0016021	P:DNA repair; P:protein phosphorylation; P:protein ubiquitination; P:modification-dependent protein catabolic process; P:nucleic acid phosphodiester bond hydrolysis; F:exonuclease activity; F:protein serine/threonine kinase activity; F:ATP binding; F:phosphoric diester hydrolase activity; F:oxidoreductase activity, acting on the CH-OH group of donors, NAD or NADP as acceptor; F:protein tag; F:ubi…	EC:3.1.4; EC:2.7.11.1; EC:1.1.1	Acting on ester bonds; Non-specific serine/threonine protein kinase; Acting on the CH-OH group of donors
115	A0A3Q7JDG4_SOLLC	A0A3Q7JDG4	UniRef90_A0A2N9E6E9	Cluster: ADP-ribosylation factor	UniProtKB Unreviewed (TrEMBL); UniParc	8	Fagus sylvatica (Beechnut); Solanum lycopersicum (Tomato); Solanum chilense (Tomato); Tetracentron sinense; Mojavia dolomitestris; Tripterygium wilfordii; Pyrus x bretschneideri		ADP-ribosylation factor 2-like	26489	15795.8	5	18	32.3276	5.455	195	30.4222	true	[BLASTED, MAPPED, ANNOTATED]	tr|A0A3Q7JDG4|A0A3Q7JDG4_SOLLC	Uncharacterized protein OS=Solanum lycopersicum OX=4081 PE=3 SV=1	232	20	7.01046e-169	96.6	5	P:GO:0006886; P:GO:0016192; F:GO:0003924; F:GO:0005525; C:GO:0009507	P:intracellular protein transport; P:vesicle-mediated transport; F:GTPase activity; F:GTP binding; C:chloroplast	EC:3.6.1	Acting on acid anhydrides
116	A0A3Q7E8A8_SOLLC	A0A3Q7E8A8	UniRef90_A0A3Q7E8A8	Cluster: ML domain-containing protein	UniProtKB Unreviewed (TrEMBL); UniParc	3	Solanum lycopersicum (Tomato); Solanum chilense (Tomato); Solanum pennellii		putative phosphatidylglycerol/phosphatidylinositol transfer protein DDB_G0282179	17525	9680.35	5	14	30.1887	10.0628	133	33.3683	true	[BLASTED, MAPPED, ANNOTATED]	tr|A0A3Q7E8A8|A0A3Q7E8A8_SOLLC	ML domain-containing protein OS=Solanum lycopersicum OX=4081 GN=101249001 PE=4 SV=1	159	20	9.63136e-113	85.74	3	P:GO:0032366; F:GO:0032934; C:GO:0016021	P:intracellular sterol transport; F:sterol binding; C:integral component of membrane
117	A0A3Q7EPW1_SOLLC	A0A3Q7EPW1	UniRef90_Q6DUX3	Cluster: Translationally-controlled tumor protein homolog	UniProtKB Reviewed (Swiss-Prot); UniProtKB Unreviewed (TrEMBL); UniParc	6	Solanum lycopersicum (Tomato); Solanum chilense (Tomato); Solanum pennellii		translationally-controlled tumor protein homolog	18900	8219.16	5	21	47.619	1.0471	169	36.0858	true	[BLASTED, MAPPED, ANNOTATED]	tr|A0A3Q7EPW1|A0A3Q7EPW1_SOLLC	TCTP domain-containing protein OS=Solanum lycopersicum OX=4081 GN=543941 PE=3 SV=1	168	20	2.34153e-119	96.25	2	F:GO:0005509; C:GO:0005737	F:calcium ion binding; C:cytoplasm
118	A0A3Q7F3S0_SOLLC	A0A3Q7F3S0	UniRef90_P47921	Cluster: Nucleoside diphosphate kinase (Fragment)	UniProtKB Reviewed (Swiss-Prot); UniProtKB Unreviewed (TrEMBL); UniParc	51	Solanum lycopersicum (Tomato); Capsicum annuum (Capsicum pepper); Flaveria bidentis (Coastal plain yellowtops); Nicotiana tabacum (Common tobacco); Cuscuta campestris; Solanum tuberosum (Potato); Solanum chacoense (Chaco potato); Olea europaea subsp. europaea; Erythranthe guttata (Yellow monkey flower); Capsicum baccatum (Peruvian pepper); Capsicum chinense (Scotch bonnet); Helianthus annuus (Com…		nucleoside diphosphate kinase	16241	7183.17	5	13	35.8108	1.2537	80	21.7906	true	[BLASTED, MAPPED, ANNOTATED]	tr|A0A3Q7F3S0|A0A3Q7F3S0_SOLLC	Nucleoside diphosphate kinase OS=Solanum lycopersicum OX=4081 GN=544095 PE=3 SV=1	148	20	2.56376e-102	97.23	7	P:GO:0006165; P:GO:0006183; P:GO:0006228; P:GO:0006241; F:GO:0004550; F:GO:0005524; F:GO:0046872	P:nucleoside diphosphate phosphorylation; P:GTP biosynthetic process; P:UTP biosynthetic process; P:CTP biosynthetic process; F:nucleoside diphosphate kinase activity; F:ATP binding; F:metal ion binding	EC:2.7.4.6	Nucleoside-diphosphate kinase
119	A0A3Q7JAV3_SOLLC	A0A3Q7JAV3	UniRef90_M1CIA9	Cluster: Malic enzyme	UniProtKB Unreviewed (TrEMBL); UniParc	14	Solanum tuberosum (Potato); Nicotiana tabacum (Common tobacco); Nicotiana attenuata (Coyote tobacco); Nicotiana sylvestris (Wood tobacco); Solanum chilense (Tomato); Solanum lycopersicum (Tomato); Solanum stenotomum; Solanum verrucosum; Solanum pennellii		NADP-dependent malic enzyme, chloroplastic	70183	6856.19	5	49	10.625	3.1527	201	36.8419	true	[BLASTED, MAPPED, ANNOTATED]	tr|A0A3Q7JAV3|A0A3Q7JAV3_SOLLC	Malic enzyme OS=Solanum lycopersicum OX=4081 GN=544164 PE=3 SV=1	640	20	0	97.24	9	P:GO:0006090; P:GO:0006108; P:GO:0006486; P:GO:0030968; F:GO:0004471; F:GO:0004473; F:GO:0046872; F:GO:0051287; C:GO:0009507	P:pyruvate metabolic process; P:malate metabolic process; P:protein glycosylation; P:endoplasmic reticulum unfolded protein response; F:malate dehydrogenase (decarboxylating) (NAD+) activity; F:malate dehydrogenase (decarboxylating) (NADP+) activity; F:metal ion binding; F:NAD binding; C:chloroplast	EC:1.1.1.38; EC:1.1.1.39; EC:1.1.1.40	Malate dehydrogenase (oxaloacetate-decarboxylating); Malate dehydrogenase (decarboxylating); Malate dehydrogenase (oxaloacetate-decarboxylating) (NADP(+))
120	A0A3Q7JBH3_SOLLC	A0A3Q7JBH3	UniRef90_A0A3Q7JBH3	Cluster: 14_3_3 domain-containing protein	UniProtKB Unreviewed (TrEMBL)	1	Solanum lycopersicum (Tomato)		14-3-3-like protein B	45120	6770.53	5	43	12.9676	10.0152	156	35.4228	true	[BLASTED]	tr|A0A3Q7JBH3|A0A3Q7JBH3_SOLLC	14_3_3 domain-containing protein OS=Solanum lycopersicum OX=4081 PE=3 SV=1	401	20	0	97.15
121	Q0ZPA3_SOLLC	Q0ZPA3	UniRef90_P80471	Cluster: Light-induced protein, chloroplastic	UniProtKB Reviewed (Swiss-Prot); UniProtKB Unreviewed (TrEMBL); UniParc	20	Solanum tuberosum (Potato); Solanum demissum (Wild potato); Solanum chacoense (Chaco potato); Solanum chilense (Tomato); Solanum lycopersicum (Tomato); Nicotiana tabacum (Common tobacco); Nicotiana sylvestris (Wood tobacco); Solanum verrucosum; Solanum stenotomum; Solanum pennellii; Nicotiana tomentosiformis; Pseudomonas putida		light-induced protein, chloroplastic	35627	5322.36	5	28	30.9816	0.86	209	40.8081	true	[BLASTED, MAPPED, ANNOTATED]	tr|Q0ZPA3|Q0ZPA3_SOLLC	Plastid lipid associated protein CHRC OS=Solanum lycopersicum OX=4081 GN=ChrC PE=2 SV=1	326	20	0	94.73	3	P:GO:0009414; P:GO:0071482; C:GO:0009535	P:response to water deprivation; P:cellular response to light stimulus; C:chloroplast thylakoid membrane
122	A0A3Q7EA80_SOLLC	A0A3Q7EA80	UniRef90_P42056	Cluster: Mitochondrial outer membrane protein porin of 36 kDa	UniProtKB Reviewed (Swiss-Prot); UniProtKB Unreviewed (TrEMBL); UniParc	19	Solanum tuberosum (Potato); Nicotiana attenuata (Coyote tobacco); Solanum chacoense (Chaco potato); Nicotiana tabacum (Common tobacco); Capsicum baccatum (Peruvian pepper); Capsicum chinense (Scotch bonnet); Capsicum annuum (Capsicum pepper); Nicotiana sylvestris (Wood tobacco); Solanum lycopersicum (Tomato); Solanum stenotomum; Nicotiana tomentosiformis		mitochondrial outer membrane protein porin of 36 kDa	29402	4013.44	5	19	23.5507	0.8412	149	37.5381	true	[BLASTED, MAPPED, ANNOTATED]	tr|A0A3Q7EA80|A0A3Q7EA80_SOLLC	Uncharacterized protein OS=Solanum lycopersicum OX=4081 GN=101250327 PE=3 SV=1	276	20	0	96.74	6	P:GO:0015698; P:GO:0098656; F:GO:0008308; F:GO:0015288; C:GO:0005741; C:GO:0046930	P:inorganic anion transport; P:anion transmembrane transport; F:voltage-gated anion channel activity; F:porin activity; C:mitochondrial outer membrane; C:pore complex	EC:7	Translocases
123	A0A3Q7IM60_SOLLC	A0A3Q7IM60	UniRef90_A2Q5T7	Cluster: V-type proton ATPase subunit	UniProtKB Unreviewed (TrEMBL); UniParc	149	Medicago truncatula (Barrel medic); Striga asiatica (Asiatic witchweed); Actinidia rufa; Artemisia annua (Sweet wormwood); Nicotiana sylvestris (Wood tobacco); Lactuca saligna (Willowleaf lettuce); Capsella rubella; Arabis nemorensis; Dendrobium catenatum; Nicotiana tabacum (Common tobacco); Phoenix dactylifera (Date palm); Cocos nucifera (Coconut palm); Glycine soja (Wild soybean); Glycine max (…		V-type proton ATPase subunit d2	40727	3938.02	5	25	22.792	0.5315	173	31.5066	true	[BLASTED, MAPPED, ANNOTATED]	tr|A0A3Q7IM60|A0A3Q7IM60_SOLLC	V-type proton ATPase subunit OS=Solanum lycopersicum OX=4081 GN=101264386 PE=3 SV=1	351	20	0	99.33	6	P:GO:0007034; P:GO:0007035; P:GO:1902600; F:GO:0015078; C:GO:0016471; C:GO:0033179	P:vacuolar transport; P:vacuolar acidification; P:proton transmembrane transport; F:proton transmembrane transporter activity; C:vacuolar proton-transporting V-type ATPase complex; C:proton-transporting V-type ATPase, V0 domain	EC:7	Translocases
124	A0A3Q7JCG7_SOLLC	A0A3Q7JCG7	UniRef90_A0A1U8EZ60	Cluster: Phosphoenolpyruvate carboxykinase (ATP)	UniProtKB Unreviewed (TrEMBL); UniParc	12	Capsicum annuum (Capsicum pepper); Solanum tuberosum (Potato); Solanum lycopersicum (Tomato); Capsicum chinense (Scotch bonnet); Capsicum baccatum (Peruvian pepper); Solanum stenotomum; Solanum verrucosum; Solanum pennellii		phosphoenolpyruvate carboxykinase [ATP]-like	71822	2706.74	5	58	10.3395	18.68	247	40.1704	true	[BLASTED, MAPPED, ANNOTATED]	tr|A0A3Q7JCG7|A0A3Q7JCG7_SOLLC	Phosphoenolpyruvate carboxykinase (ATP) OS=Solanum lycopersicum OX=4081 PE=3 SV=1	648	20	0	93.16	6	P:GO:0006094; P:GO:0016310; F:GO:0004612; F:GO:0005524; F:GO:0016301; C:GO:0005829	P:gluconeogenesis; P:phosphorylation; F:phosphoenolpyruvate carboxykinase (ATP) activity; F:ATP binding; F:kinase activity; C:cytosol	EC:4.1.1.49; EC:2.7; EC:4.1.1.32	Phosphoenolpyruvate carboxykinase (ATP); Transferring phosphorus-containing groups; Phosphoenolpyruvate carboxykinase (GTP)
125	A0A3Q7HFP1_SOLLC	A0A3Q7HFP1	UniRef90_M1C102	Cluster: Glycerophosphodiester phosphodiesterase	UniProtKB Unreviewed (TrEMBL); UniParc	9	Solanum tuberosum (Potato); Solanum chacoense (Chaco potato); Solanum chilense (Tomato); Solanum lycopersicum (Tomato); Solanum pennellii; Solanum verrucosum; Solanum stenotomum		glycerophosphodiester phosphodiesterase GDPDL4	82092	2479.62	5	36	7.0385	1.4914	199	26.6204	true	[BLASTED, MAPPED, ANNOTATED]	tr|A0A3Q7HFP1|A0A3Q7HFP1_SOLLC	Glycerophosphodiester phosphodiesterase OS=Solanum lycopersicum OX=4081 GN=101262834 PE=4 SV=1	753	20	0	88.57	4	P:GO:0006071; P:GO:0006629; F:GO:0008889; C:GO:0016021	P:glycerol metabolic process; P:lipid metabolic process; F:glycerophosphodiester phosphodiesterase activity; C:integral component of membrane	EC:3.1.4.46	Glycerophosphodiester phosphodiesterase
126	A0A3Q7F5Y3_SOLLC	A0A3Q7F5Y3	UniRef90_A0A3Q7F5Y3	Cluster: Aspartic proteinase-like	UniProtKB Unreviewed (TrEMBL); UniParc	6	Solanum lycopersicum (Tomato); Solanum chilense (Tomato); Solanum pennellii		aspartic proteinase-like	58813	2452.7	5	39	10.0372	3.4221	135	35.5659	true	[BLASTED, MAPPED, ANNOTATED]	tr|A0A3Q7F5Y3|A0A3Q7F5Y3_SOLLC	Uncharacterized protein OS=Solanum lycopersicum OX=4081 PE=3 SV=1	538	20	0	91.49	4	P:GO:0006508; P:GO:0006629; F:GO:0004190; C:GO:0016021	P:proteolysis; P:lipid metabolic process; F:aspartic-type endopeptidase activity; C:integral component of membrane	EC:3.4.23	Acting on peptide bonds (peptidases)
127	A0A3Q7GIP0_SOLLC	A0A3Q7GIP0	UniRef90_M1B5Y6	Cluster: Glutamine synthetase	UniProtKB Unreviewed (TrEMBL); UniParc	10	Solanum tuberosum (Potato); Solanum chacoense (Chaco potato); Solanum chilense (Tomato); Capsicum annuum (Capsicum pepper); Solanum lycopersicum (Tomato); Solanum stenotomum; Solanum verrucosum		glutamine synthetase-like	38928	2248.71	5	30	7.3034	1.4407	60	27.6991	true	[BLASTED, MAPPED, ANNOTATED]	tr|A0A3Q7GIP0|A0A3Q7GIP0_SOLLC	Glutamine synthetase OS=Solanum lycopersicum OX=4081 GN=101261030 PE=3 SV=1	356	20	0	95.83	4	P:GO:0006542; F:GO:0004356; F:GO:0005524; C:GO:0005737	P:glutamine biosynthetic process; F:glutamate-ammonia ligase activity; F:ATP binding; C:cytoplasm	EC:6.3.1.2	Glutamine synthetase
128	A0A3Q7HNN1_SOLLC	A0A3Q7HNN1	UniRef90_A0A1S2XL88	Cluster: Clathrin heavy chain	UniProtKB Unreviewed (TrEMBL); UniParc	239	Cicer arietinum (Chickpea); Lupinus albus (White lupine); Morus notabilis; Nicotiana attenuata (Coyote tobacco); Glycine soja (Wild soybean); Senna tora; Punica granatum (Pomegranate); Thalictrum thalictroides (Rue-anemone); Aquilegia coerulea (Rocky mountain columbine); Noccaea caerulescens (Alpine penny-cress); Zea mays (Maize); Lupinus angustifolius (Narrow-leaved blue lupine); Eutrema salsugi…		clathrin heavy chain 1	192529	2213.7	5	151	4.9971	9.3127	669	36.8766	true	[BLASTED, MAPPED, ANNOTATED]	tr|A0A3Q7HNN1|A0A3Q7HNN1_SOLLC	Clathrin heavy chain OS=Solanum lycopersicum OX=4081 GN=101250125 PE=3 SV=1	1701	20	0	98.93	10	P:GO:0006886; P:GO:0006898; F:GO:0005198; F:GO:0032051; C:GO:0005829; C:GO:0009506; C:GO:0009507; C:GO:0030130; C:GO:0030132; C:GO:0071439	P:intracellular protein transport; P:receptor-mediated endocytosis; F:structural molecule activity; F:clathrin light chain binding; C:cytosol; C:plasmodesma; C:chloroplast; C:clathrin coat of trans-Golgi network vesicle; C:clathrin coat of coated pit; C:clathrin complex
129	PME3_SOLLC	Q96576	UniRef90_Q96576	Cluster: Pectinesterase 3	UniProtKB Reviewed (Swiss-Prot); UniProtKB Unreviewed (TrEMBL); UniParc	9	Solanum lycopersicum (Tomato); Solanum tuberosum (Potato); Solanum pennellii; Solanum verrucosum; Solanum stenotomum		pectinesterase 2.1	60210	2212.2	5	41	14.3382	22.1036	210	39.326	true	[BLASTED, MAPPED, ANNOTATED]	sp|Q96576|PME3_SOLLC	Pectinesterase 3 OS=Solanum lycopersicum OX=4081 GN=PME3 PE=3 SV=1	544	20	0	91.28	10	P:GO:0009835; P:GO:0042545; P:GO:0043086; P:GO:0045490; F:GO:0030599; F:GO:0045330; F:GO:0046910; C:GO:0005576; C:GO:0005618; C:GO:0016021	P:fruit ripening; P:cell wall modification; P:negative regulation of catalytic activity; P:pectin catabolic process; F:pectinesterase activity; F:aspartyl esterase activity; F:pectinesterase inhibitor activity; C:extracellular region; C:cell wall; C:integral component of membrane	EC:3.1.1.11	Pectinesterase
130	Q9FT17_SOLLC	Q9FT17	UniRef90_Q9FT17	Cluster: Lipoxygenase	UniProtKB Unreviewed (TrEMBL); UniParc	9	Solanum lycopersicum (Tomato); Solanum pennellii; Solanum verrucosum; Solanum stenotomum; Mojavia dolomitestris		probable linoleate 9S-lipoxygenase 5	97444	1922.97	5	85	3.4803	19.4525	177	35.675	true	[BLASTED, MAPPED, ANNOTATED]	tr|Q9FT17|Q9FT17_SOLLC	Lipoxygenase OS=Solanum lycopersicum OX=4081 PE=2 SV=1	862	20	0	95.33	5	P:GO:0006633; P:GO:0031408; P:GO:0034440; F:GO:0016702; F:GO:0046872	P:fatty acid biosynthetic process; P:oxylipin biosynthetic process; P:lipid oxidation; F:oxidoreductase activity, acting on single donors with incorporation of molecular oxygen, incorporation of two atoms of oxygen; F:metal ion binding	EC:1.13.11	Acting on single donors with incorporation of molecular oxygen (oxygenases). The oxygen incorporated need not be derived from O(2)
131	A0A3Q7ENA4_SOLLC	A0A3Q7ENA4	UniRef90_A0A3Q7ENA4	Cluster: Lipoxygenase	UniProtKB Unreviewed (TrEMBL); UniParc	3	Solanum lycopersicum (Tomato); Solanum chilense (Tomato); Solanum stenotomum		putative linoleate 9S-lipoxygenase 5	96952	1871.13	5	86	5.3864	21.9049	157	33.2165	true	[BLASTED, MAPPED, ANNOTATED]	tr|A0A3Q7ENA4|A0A3Q7ENA4_SOLLC	Lipoxygenase OS=Solanum lycopersicum OX=4081 GN=107648852 PE=3 SV=1	854	20	0	91.43	5	P:GO:0006633; P:GO:0031408; P:GO:0034440; F:GO:0016702; F:GO:0046872	P:fatty acid biosynthetic process; P:oxylipin biosynthetic process; P:lipid oxidation; F:oxidoreductase activity, acting on single donors with incorporation of molecular oxygen, incorporation of two atoms of oxygen; F:metal ion binding	EC:1.13.11	Acting on single donors with incorporation of molecular oxygen (oxygenases). The oxygen incorporated need not be derived from O(2)
132	A0A3Q7FM19_SOLLC	A0A3Q7FM19	UniRef90_A0A087H8P2	Cluster: Clathrin heavy chain	UniProtKB Unreviewed (TrEMBL); UniParc	12	Arabis alpina (Alpine rock-cress); Solanum chacoense (Chaco potato); Durio zibethinus (Durian); Solanum lycopersicum (Tomato); Mojavia dolomitestris; Solanum stenotomum; Solanum verrucosum; Solanum pennellii		clathrin heavy chain 1	192953	1535.15	5	151	4.3478	17.0559	604	38.002	true	[BLASTED, MAPPED, ANNOTATED]	tr|A0A3Q7FM19|A0A3Q7FM19_SOLLC	Clathrin heavy chain OS=Solanum lycopersicum OX=4081 GN=101259922 PE=3 SV=1	1702	20	0	98.33	10	P:GO:0006886; P:GO:0006898; F:GO:0005198; F:GO:0032051; C:GO:0005829; C:GO:0009506; C:GO:0009507; C:GO:0030130; C:GO:0030132; C:GO:0071439	P:intracellular protein transport; P:receptor-mediated endocytosis; F:structural molecule activity; F:clathrin light chain binding; C:cytosol; C:plasmodesma; C:chloroplast; C:clathrin coat of trans-Golgi network vesicle; C:clathrin coat of coated pit; C:clathrin complex
133	A0A3Q7F872_SOLLC	A0A3Q7F872	UniRef90_A0A1S3YWY0	Cluster: mediator of RNA polymerase II transcription subunit 37a-like	UniProtKB Unreviewed (TrEMBL); UniParc	19	Nicotiana tabacum (Common tobacco); Solanum lycopersicum (Tomato); Solanum tuberosum (Potato); Solanum chacoense (Chaco potato); Solanum chilense (Tomato); Nicotiana sylvestris (Wood tobacco); Nicotiana attenuata (Coyote tobacco); Capsicum annuum (Capsicum pepper); Capsicum chinense (Scotch bonnet); Capsicum baccatum (Peruvian pepper); Solanum pennellii		luminal-binding protein 5	74724	18071.3	4	69	10.2985	11.8266	184	38.7812	true	[BLASTED, MAPPED, ANNOTATED]	tr|A0A3Q7F872|A0A3Q7F872_SOLLC	Uncharacterized protein OS=Solanum lycopersicum OX=4081 PE=3 SV=1	670	20	0	96.13	13	P:GO:0030433; P:GO:0030968; P:GO:0042026; P:GO:0051085; F:GO:0005524; F:GO:0031072; F:GO:0044183; F:GO:0051082; F:GO:0051787; C:GO:0005634; C:GO:0005788; C:GO:0016020; C:GO:0034663	P:ubiquitin-dependent ERAD pathway; P:endoplasmic reticulum unfolded protein response; P:protein refolding; P:chaperone cofactor-dependent protein refolding; F:ATP binding; F:heat shock protein binding; F:protein folding chaperone; F:unfolded protein binding; F:misfolded protein binding; C:nucleus; C:endoplasmic reticulum lumen; C:membrane; C:endoplasmic reticulum chaperone complex
134	A0A3Q7ELA6_SOLLC	A0A3Q7ELA6	UniRef90_A0A6N2BBX6	Cluster: Fasciclin-like arabinogalactan protein 8	UniProtKB Unreviewed (TrEMBL); UniParc	4	Solanum chilense (Tomato); Solanum lycopersicum (Tomato); Solanum pennellii		Fasciclin-like arabinogalactan protein 8	37209	5860.81	4	22	20.904	0.9687	150	29.6862	true	[BLASTED, MAPPED, ANNOTATED]	tr|A0A3Q7ELA6|A0A3Q7ELA6_SOLLC	Uncharacterized protein OS=Solanum lycopersicum OX=4081 PE=3 SV=1	354	20	0	82.25	2	C:GO:0016021; C:GO:0046658	C:integral component of membrane; C:anchored component of plasma membrane
135	A0A3Q7G727_SOLLC	A0A3Q7G727	UniRef90_M1CBH0	Cluster: Alcohol dehydrogenase 1	UniProtKB Unreviewed (TrEMBL); UniParc	12	Solanum tuberosum (Potato); Capsicum chinense (Scotch bonnet); Capsicum annuum (Capsicum pepper); Solanum chilense (Tomato); Capsicum baccatum (Peruvian pepper); Solanum lycopersicum (Tomato); Solanum pennellii; Solanum verrucosum		alcohol dehydrogenase 1	41124	5481.64	4	29	7.9156	4.6273	115	26.753	true	[BLASTED, MAPPED, ANNOTATED]	tr|A0A3Q7G727|A0A3Q7G727_SOLLC	Uncharacterized protein OS=Solanum lycopersicum OX=4081 GN=101261114 PE=3 SV=1	379	20	0	97.41	5	P:GO:0046294; F:GO:0004024; F:GO:0008270; F:GO:0051903; C:GO:0005829	P:formaldehyde catabolic process; F:alcohol dehydrogenase activity, zinc-dependent; F:zinc ion binding; F:S-(hydroxymethyl)glutathione dehydrogenase activity; C:cytosol	EC:1.1.1.284; EC:1.1.1.1; EC:1.1.1.71	S-(hydroxymethyl)glutathione dehydrogenase; Alcohol dehydrogenase; Alcohol dehydrogenase (NAD(P)(+))
136	V5YN09_SOLLC	V5YN09	UniRef90_M1C8M4	Cluster: Major intrinsic protein 2	UniProtKB Unreviewed (TrEMBL); UniParc	45	Solanum tuberosum (Potato); Capsicum chinense (Scotch bonnet); Nicotiana tomentosiformis (Tobacco); Capsicum baccatum (Peruvian pepper); Nicotiana attenuata (Coyote tobacco); Nicotiana sylvestris (Wood tobacco); Nicotiana tabacum (Common tobacco); Nicotiana glauca (Glaucous tobacco); Capsicum annuum (Capsicum pepper); Solanum lycopersicum (Tomato); Solanum chilense (Tomato); Solanum chacoense (Ch…		aquaporin PIP2-4-like	30638	5326.52	4	19	14.6341	1.4696	114	20.0236	true	[BLASTED, MAPPED, ANNOTATED]	tr|V5YN09|V5YN09_SOLLC	Plasmamembrane intrinsic protein 26 OS=Solanum lycopersicum OX=4081 GN=PIP2;6 PE=2 SV=1	287	20	0	95.75	5	P:GO:0006833; P:GO:0055085; F:GO:0015250; C:GO:0005886; C:GO:0016021	P:water transport; P:transmembrane transport; F:water channel activity; C:plasma membrane; C:integral component of membrane	EC:7	Translocases
137	G3JX11_SOLLC	G3JX11	UniRef90_P54153	Cluster: Peptide methionine sulfoxide reductase (Fragment)	UniProtKB Reviewed (Swiss-Prot); UniProtKB Unreviewed (TrEMBL); UniParc	9	Solanum lycopersicum (Tomato); Solanum melongena (Eggplant); Solanum chilense (Tomato); Solanum chacoense (Chaco potato); Solanum pennellii; Solanum verrucosum; Mojavia dolomitestris		peptide methionine sulfoxide reductase	21061	5038.28	4	17	25.5319	1.0543	114	16.865	true	[BLASTED, MAPPED, ANNOTATED]	tr|G3JX11|G3JX11_SOLLC	Protein-methionine-S-oxide reductase OS=Solanum lycopersicum OX=4081 GN=MSRA PE=3 SV=1	188	20	6.16637e-140	93.03	4	P:GO:0034599; F:GO:0008113; F:GO:0036456; C:GO:0005737	P:cellular response to oxidative stress; F:peptide-methionine (S)-S-oxide reductase activity; F:L-methionine-(S)-S-oxide reductase activity; C:cytoplasm	EC:1.8.4.13; EC:1.8.4.11	L-methionine (S)-S-oxide reductase; Peptide-methionine (S)-S-oxide reductase
138	A0A3Q7ITP5_SOLLC	A0A3Q7ITP5	UniRef90_A0A3Q7ITP5	Cluster: SHSP domain-containing protein	UniProtKB Unreviewed (TrEMBL); UniParc	10	Solanum lycopersicum (Tomato); Solanum tuberosum (Potato); Solanum stenotomum; Solanum pennellii		22.0 kDa class IV heat shock protein	21437	5014.43	4	15	21.0526	7.97	97	32.336	true	[BLASTED, MAPPED, ANNOTATED]	tr|A0A3Q7ITP5|A0A3Q7ITP5_SOLLC	SHSP domain-containing protein OS=Solanum lycopersicum OX=4081 GN=544205 PE=3 SV=1	190	20	1.28504e-134	85.02	8	P:GO:0006457; P:GO:0009408; P:GO:0009651; P:GO:0042542; P:GO:0051259; F:GO:0043621; F:GO:0051082; C:GO:0005783	P:protein folding; P:response to heat; P:response to salt stress; P:response to hydrogen peroxide; P:protein complex oligomerization; F:protein self-association; F:unfolded protein binding; C:endoplasmic reticulum
139	A0A494G9Z3_SOLLC	A0A494G9Z3	UniRef90_A0A494G9Z3	Cluster: Tripeptidyl-peptidase II	UniProtKB Unreviewed (TrEMBL)	1	Solanum lycopersicum (Tomato)		tripeptidyl-peptidase 2	24029	4902.62	4	20	28.7671	0.8005	100	25.6966	true	[BLASTED, MAPPED, ANNOTATED]	tr|A0A494G9Z3|A0A494G9Z3_SOLLC	Uncharacterized protein OS=Solanum lycopersicum OX=4081 PE=4 SV=1	219	20	2.00767e-161	92.86	5	P:GO:0006508; F:GO:0004177; F:GO:0004252; F:GO:0008240; C:GO:0005829	P:proteolysis; F:aminopeptidase activity; F:serine-type endopeptidase activity; F:tripeptidyl-peptidase activity; C:cytosol	EC:3.4.11; EC:3.4.21; EC:3.4.14.10; EC:3.4.14.9	Acting on peptide bonds (peptidases); Acting on peptide bonds (peptidases); Tripeptidyl-peptidase II; Tripeptidyl-peptidase I
140	A0A3Q7FR32_SOLLC	A0A3Q7FR32	UniRef90_A0A3Q7FR32	Cluster: SHSP domain-containing protein	UniProtKB Unreviewed (TrEMBL); UniParc	10	Solanum lycopersicum (Tomato); Solanum tuberosum (Potato); Solanum chilense (Tomato); Solanum pennellii; Solanum verrucosum; Solanum stenotomum		22.0 kDa class IV heat shock protein-like	20546	4781.02	4	15	22.7778	0.6816	75	26.3674	true	[BLASTED, MAPPED, ANNOTATED]	tr|A0A3Q7FR32|A0A3Q7FR32_SOLLC	SHSP domain-containing protein OS=Solanum lycopersicum OX=4081 PE=3 SV=1	180	20	1.42439e-127	90.27	8	P:GO:0006457; P:GO:0009408; P:GO:0009651; P:GO:0042542; P:GO:0051259; F:GO:0043621; F:GO:0051082; C:GO:0005737	P:protein folding; P:response to heat; P:response to salt stress; P:response to hydrogen peroxide; P:protein complex oligomerization; F:protein self-association; F:unfolded protein binding; C:cytoplasm
141	A0A3Q7IR67_SOLLC	A0A3Q7IR67	UniRef90_P93787	Cluster: 14-3-3 protein	UniProtKB Unreviewed (TrEMBL); UniParc	5	Solanum tuberosum (Potato); Solanum chacoense (Chaco potato); Solanum lycopersicum (Tomato)		14-3-3 protein 1	28183	4479.07	4	28	20.0803	1.582	142	33.5482	true	[BLASTED]	tr|A0A3Q7IR67|A0A3Q7IR67_SOLLC	14_3_3 domain-containing protein OS=Solanum lycopersicum OX=4081 GN=101243846 PE=3 SV=1	249	20	0	97.97
142	A0A3Q7IMP4_SOLLC	A0A3Q7IMP4	UniRef90_A0A3Q7IMP4	Cluster: SOUL heme-binding family protein	UniProtKB Unreviewed (TrEMBL); UniParc	10	Solanum lycopersicum (Tomato); Solanum chilense (Tomato); Solanum chacoense (Chaco potato); Solanum tuberosum (Potato); Nicotiana tabacum (Common tobacco); Nicotiana sylvestris (Wood tobacco); Solanum pennellii; Solanum stenotomum; Solanum verrucosum		heme-binding-like protein At3g10130, chloroplastic	22195	4173.73	4	20	24.6231	2.4806	138	38.1908	true	[BLASTED]	tr|A0A3Q7IMP4|A0A3Q7IMP4_SOLLC	Uncharacterized protein OS=Solanum lycopersicum OX=4081 GN=101251239 PE=3 SV=1	199	20	1.64822e-141	92.53
143	A0A3Q7HUQ3_SOLLC	A0A3Q7HUQ3	UniRef90_P25861	Cluster: Glyceraldehyde-3-phosphate dehydrogenase, cytosolic	UniProtKB Reviewed (Swiss-Prot); UniProtKB Unreviewed (TrEMBL); UniParc	75	Antirrhinum majus (Garden snapdragon); Petunia hybrida (Petunia); Prunus dulcis (Almond); Hevea brasiliensis (Para rubber tree); Lactuca sativa (Garden lettuce); Daucus carota subsp. sativus (Carrot); Artemisia annua (Sweet wormwood); Mikania micrantha; Helianthus annuus (Common sunflower); Ananas comosus (Pineapple); Ananas comosus var. bracteatus; Vernicia fordii (Tung); Nicotiana attenuata (Co…		glyceraldehyde-3-phosphate dehydrogenase, cytosolic	36661	4141.04	4	31	14.2433	6.9201	187	37.0803	true	[BLASTED, MAPPED, ANNOTATED]	tr|A0A3Q7HUQ3|A0A3Q7HUQ3_SOLLC	Glyceraldehyde-3-phosphate dehydrogenase OS=Solanum lycopersicum OX=4081 GN=101255800 PE=3 SV=1	337	20	0	98.9	6	P:GO:0006006; P:GO:0006096; F:GO:0004365; F:GO:0050661; F:GO:0051287; C:GO:0005829	P:glucose metabolic process; P:glycolytic process; F:glyceraldehyde-3-phosphate dehydrogenase (NAD+) (phosphorylating) activity; F:NADP binding; F:NAD binding; C:cytosol	EC:1.2.1.59; EC:1.2.1.12	Glyceraldehyde-3-phosphate dehydrogenase (NAD(P)(+)) (phosphorylating); Glyceraldehyde-3-phosphate dehydrogenase (phosphorylating)
144	Q5QJB4_SOLLC	Q5QJB4	UniRef90_Q5QJB4	Cluster: Harpin binding protein 1	UniProtKB Unreviewed (TrEMBL); UniParc	7	Solanum lycopersicum (Tomato); Capsicum baccatum (Peruvian pepper); Capsicum annuum (Capsicum pepper); Capsicum chinense (Scotch bonnet); Solanum stenotomum; Solanum pennellii		probable plastid-lipid-associated protein 6, chloroplastic	30064	4094.27	4	22	23.1884	1.6685	224	37.9745	true	[BLASTED]	tr|Q5QJB4|Q5QJB4_SOLLC	Harpin binding protein 1 OS=Solanum lycopersicum OX=4081 GN=HrBP1 PE=2 SV=1	276	20	0	90.57
145	A0A3Q7HJ62_SOLLC	A0A3Q7HJ62	UniRef90_A0A1U8EK55	Cluster: Late embryogenesis abundant protein, LEA-14	UniProtKB Unreviewed (TrEMBL); UniParc	13	Capsicum annuum (Capsicum pepper); Solanum lycopersicum (Tomato); Solanum chacoense (Chaco potato); Solanum tuberosum (Potato); Capsicum baccatum (Peruvian pepper); Solanum chilense (Tomato); Capsicum chinense (Scotch bonnet); Solanum verrucosum; Solanum pennellii		desiccation protectant protein lea14-like protein	38633	3818.12	4	35	18.6782	10.5267	223	39.1556	true	[BLASTED, MAPPED, ANNOTATED]	tr|A0A3Q7HJ62|A0A3Q7HJ62_SOLLC	Uncharacterized protein OS=Solanum lycopersicum OX=4081 PE=3 SV=1	348	20	0	96.07	2	P:GO:0009269; C:GO:0005829	P:response to desiccation; C:cytosol
146	Q38JE1_SOLLC	Q38JE1	UniRef90_A0A1U8FD13	Cluster: Lipocln_cytosolic_FA-bd_dom domain-containing protein	UniProtKB Unreviewed (TrEMBL); UniParc	14	Capsicum annuum (Capsicum pepper); Solanum tuberosum (Potato); Solanum chilense (Tomato); Capsicum baccatum (Peruvian pepper); Solanum lycopersicum (Tomato); Solanum chacoense (Chaco potato); Solanum pennellii; Solanum verrucosum		temperature-induced lipocalin-1	21245	3812.92	4	18	21.6216	0.7456	110	25.7501	true	[BLASTED, MAPPED, ANNOTATED]	tr|Q38JE1|Q38JE1_SOLLC	Temperature-induced lipocalin OS=Solanum lycopersicum OX=4081 GN=TIL' PE=2 SV=1	185	20	2.57383e-133	95.71	3	P:GO:0000302; P:GO:0006629; C:GO:0005737	P:response to reactive oxygen species; P:lipid metabolic process; C:cytoplasm
147	A0A3Q7I245_SOLLC	A0A3Q7I245	UniRef90_A0A3Q7I245	Cluster: EF1_GNE domain-containing protein	UniProtKB Unreviewed (TrEMBL); UniParc	23	Solanum lycopersicum (Tomato); Solanum chilense (Tomato); Solanum tuberosum (Potato); Solanum chacoense (Chaco potato); Capsicum annuum (Capsicum pepper); Capsicum chinense (Scotch bonnet); Solanum stenotomum; Solanum pennellii; Solanum verrucosum		elongation factor 1-delta 1-like	25252	3681.06	4	19	15.0862	3.1205	132	30.2179	true	[BLASTED, MAPPED, ANNOTATED]	tr|A0A3Q7I245|A0A3Q7I245_SOLLC	EF1_GNE domain-containing protein OS=Solanum lycopersicum OX=4081 PE=3 SV=1	232	20	8.51667e-166	97.87	6	P:GO:0006414; P:GO:0050790; F:GO:0003746; F:GO:0005085; C:GO:0005829; C:GO:0005853	P:translational elongation; P:regulation of catalytic activity; F:translation elongation factor activity; F:guanyl-nucleotide exchange factor activity; C:cytosol; C:eukaryotic translation elongation factor 1 complex
148	A0A3Q7F355_SOLLC	A0A3Q7F355	UniRef90_A0A3Q7F355	Cluster: Low-temperature-induced cysteine proteinase-like	UniProtKB Unreviewed (TrEMBL); UniParc	9	Solanum lycopersicum (Tomato); Solanum tuberosum (Potato); Solanum chilense (Tomato); Solanum verrucosum; Solanum pennellii; Solanum stenotomum		low-temperature-induced cysteine proteinase-like	55522	3620.89	4	29	15	7.6702	244	38.9757	true	[BLASTED, MAPPED, ANNOTATED]	tr|A0A3Q7F355|A0A3Q7F355_SOLLC	Uncharacterized protein OS=Solanum lycopersicum OX=4081 GN=101246497 PE=3 SV=1	500	20	0	85.89	5	P:GO:0051603; F:GO:0004197; F:GO:0005515; C:GO:0005615; C:GO:0005764	P:proteolysis involved in cellular protein catabolic process; F:cysteine-type endopeptidase activity; F:protein binding; C:extracellular space; C:lysosome	EC:3.4.22	Acting on peptide bonds (peptidases)
149	A0A3Q7EN25_SOLLC	A0A3Q7EN25	UniRef90_A0A3Q7EN25	Cluster: Lipoxygenase	UniProtKB Unreviewed (TrEMBL)	1	Solanum lycopersicum (Tomato)		probable linoleate 9S-lipoxygenase 5	186203	3299.83	4	162	1.836	28.727	124	38.813	true	[BLASTED, MAPPED, ANNOTATED]	tr|A0A3Q7EN25|A0A3Q7EN25_SOLLC	Lipoxygenase OS=Solanum lycopersicum OX=4081 PE=3 SV=1	1634	20	0	82.27	4	P:GO:0006633; P:GO:0031408; F:GO:0016702; F:GO:0046872	P:fatty acid biosynthetic process; P:oxylipin biosynthetic process; F:oxidoreductase activity, acting on single donors with incorporation of molecular oxygen, incorporation of two atoms of oxygen; F:metal ion binding	EC:1.13.11	Acting on single donors with incorporation of molecular oxygen (oxygenases). The oxygen incorporated need not be derived from O(2)
150	A0A3Q7FRU0_SOLLC	A0A3Q7FRU0	UniRef90_A0A3Q7FRU0	Cluster: ATP synthase subunit gamma	UniProtKB Unreviewed (TrEMBL); UniParc	4	Solanum lycopersicum (Tomato); Solanum pennellii		ATP synthase subunit gamma, mitochondrial	36777	3271.31	4	30	19.1045	1.0323	142	32.7898	true	[BLASTED, MAPPED, ANNOTATED]	tr|A0A3Q7FRU0|A0A3Q7FRU0_SOLLC	Uncharacterized protein OS=Solanum lycopersicum OX=4081 PE=3 SV=1	335	20	0	93.15	3	P:GO:0015986; F:GO:0046933; C:GO:0000275	P:ATP synthesis coupled proton transport; F:proton-transporting ATP synthase activity, rotational mechanism; C:mitochondrial proton-transporting ATP synthase complex, catalytic sector F(1)	EC:7.1.2.2; EC:6	H(+)-transporting two-sector ATPase; Ligases
151	A0A3Q7FTL7_SOLLC	A0A3Q7FTL7	UniRef90_A0A3Q7FTL7	Cluster: Polygalacturonase	UniProtKB Unreviewed (TrEMBL)	1	Solanum lycopersicum (Tomato)		probable polygalacturonase At3g15720	57987	3242.72	4	32	12.5926	2.6201	167	34.5851	true	[BLASTED, MAPPED, ANNOTATED]	tr|A0A3Q7FTL7|A0A3Q7FTL7_SOLLC	Uncharacterized protein OS=Solanum lycopersicum OX=4081 PE=3 SV=1	540	20	0	83.01	4	P:GO:0005975; F:GO:0004650; C:GO:0005618; C:GO:0016021	P:carbohydrate metabolic process; F:polygalacturonase activity; C:cell wall; C:integral component of membrane	EC:3.2.1.15	Endo-polygalacturonase
152	A0A3Q7F8W6_SOLLC	A0A3Q7F8W6	UniRef90_O22347	Cluster: Tubulin alpha-1 chain	UniProtKB Reviewed (Swiss-Prot); UniProtKB Unreviewed (TrEMBL); UniParc	322	Eleusine indica (Goosegrass); Oryza sativa subsp. japonica (Rice); Zea mays (Maize); Hordeum vulgare (Barley); Triticum aestivum (Wheat); Miscanthus sinensis (Japanese silver grass); Panicum miliaceum (Proso millet); Panicum virgatum (Blackwell switchgrass); Panicum hallii var. hallii; Panicum hallii; Dichanthelium oligosanthes; Eragrostis tef (Teff); Phtheirospermum japonicum; Coffea canephora (…		tubulin alpha chain	49631	3134.82	4	34	14	5.7001	171	36.678	true	[BLASTED, MAPPED, ANNOTATED]	tr|A0A3Q7F8W6|A0A3Q7F8W6_SOLLC	Tubulin alpha chain OS=Solanum lycopersicum OX=4081 GN=101255154 PE=3 SV=1	450	20	0	99.24	8	P:GO:0000226; P:GO:0000278; F:GO:0003924; F:GO:0005200; F:GO:0005516; F:GO:0005525; C:GO:0005737; C:GO:0005874	P:microtubule cytoskeleton organization; P:mitotic cell cycle; F:GTPase activity; F:structural constituent of cytoskeleton; F:calmodulin binding; F:GTP binding; C:cytoplasm; C:microtubule	EC:3.6.1	Acting on acid anhydrides
153	A0A3Q7F639_SOLLC	A0A3Q7F639	UniRef90_P21343	Cluster: Pyrophosphate--fructose 6-phosphate 1-phosphotransferase subunit beta	UniProtKB Reviewed (Swiss-Prot); UniProtKB Unreviewed (TrEMBL); UniParc	19	Solanum tuberosum (Potato); Capsicum baccatum (Peruvian pepper); Capsicum chinense (Scotch bonnet); Capsicum annuum (Capsicum pepper); Solanum lycopersicum (Tomato); Nicotiana tabacum (Common tobacco); Nicotiana attenuata (Coyote tobacco); Solanum chilense (Tomato); Solanum chacoense (Chaco potato); Solanum verrucosum; Solanum stenotomum; Solanum pennellii; Ipomoea triloba; Ipomoea nil		pyrophosphate--fructose 6-phosphate 1-phosphotransferase subunit beta	61726	2983.2	4	47	15.1142	2.4825	321	36.2229	true	[BLASTED, MAPPED, ANNOTATED]	tr|A0A3Q7F639|A0A3Q7F639_SOLLC	Pyrophosphate--fructose 6-phosphate 1-phosphotransferase subunit beta OS=Solanum lycopersicum OX=4081 GN=101243849 PE=3 SV=1	569	20	0	96.02	10	P:GO:0006002; P:GO:0009749; P:GO:0015979; P:GO:0046835; P:GO:0061615; F:GO:0003872; F:GO:0005524; F:GO:0046872; F:GO:0047334; C:GO:0005829	P:fructose 6-phosphate metabolic process; P:response to glucose; P:photosynthesis; P:carbohydrate phosphorylation; P:glycolytic process through fructose-6-phosphate; F:6-phosphofructokinase activity; F:ATP binding; F:metal ion binding; F:diphosphate-fructose-6-phosphate 1-phosphotransferase activity; C:cytosol	EC:2.7.1.90; EC:2.7.1.11	Diphosphate--fructose-6-phosphate 1-phosphotransferase; 6-phosphofructokinase
154	A0A3Q7ENN1_SOLLC	A0A3Q7ENN1	UniRef90_Q40401	Cluster: Calreticulin	UniProtKB Reviewed (Swiss-Prot); UniProtKB Unreviewed (TrEMBL); UniParc	21	Nicotiana plumbaginifolia (Leadwort-leaved tobacco); Capsicum chinense (Scotch bonnet); Capsicum annuum (Capsicum pepper); Solanum chilense (Tomato); Nicotiana attenuata (Coyote tobacco); Nicotiana sylvestris (Wood tobacco); Nicotiana tabacum (Common tobacco); Solanum tuberosum (Potato); Solanum chacoense (Chaco potato); Solanum lycopersicum (Tomato); Solanum verrucosum; Solanum stenotomum		calreticulin	44636	2949.81	4	39	18.7179	0.8588	177	30.8275	true	[BLASTED, MAPPED, ANNOTATED]	tr|A0A3Q7ENN1|A0A3Q7ENN1_SOLLC	Calreticulin OS=Solanum lycopersicum OX=4081 PE=3 SV=1	390	20	0	97.36	12	P:GO:0006457; P:GO:0015031; P:GO:0016192; P:GO:0030433; F:GO:0003924; F:GO:0005509; F:GO:0005525; F:GO:0030246; F:GO:0051082; C:GO:0005788; C:GO:0005789; C:GO:0005794	P:protein folding; P:protein transport; P:vesicle-mediated transport; P:ubiquitin-dependent ERAD pathway; F:GTPase activity; F:calcium ion binding; F:GTP binding; F:carbohydrate binding; F:unfolded protein binding; C:endoplasmic reticulum lumen; C:endoplasmic reticulum membrane; C:Golgi apparatus	EC:3.6.1	Acting on acid anhydrides
155	O81536_SOLLC	O81536	UniRef90_O24132	Cluster: Annexin	UniProtKB Unreviewed (TrEMBL); UniParc	21	Nicotiana tabacum (Common tobacco); Nicotiana sylvestris (Wood tobacco); Solanum tuberosum (Potato); Solanum lycopersicum (Tomato); Solanum chilense (Tomato); Solanum chacoense (Chaco potato); Nicotiana attenuata (Coyote tobacco); Capsicum chinense (Scotch bonnet); Capsicum annuum (Capsicum pepper); Capsicum baccatum (Peruvian pepper); Kribbella monticola; Solanum stenotomum; Solanum verrucosum; …		annexin D1-like	35779	2938.29	4	41	15.6051	0.6307	110	28.2635	true	[BLASTED, MAPPED, ANNOTATED]	tr|O81536|O81536_SOLLC	Annexin OS=Solanum lycopersicum OX=4081 GN=AN34 PE=2 SV=1	314	20	0	96.89	3	F:GO:0005509; F:GO:0005544; C:GO:0005737	F:calcium ion binding; F:calcium-dependent phospholipid binding; C:cytoplasm
156	A0A3Q7J2T1_SOLLC	A0A3Q7J2T1	UniRef90_M1AGW8	Cluster: Aconitate hydratase	UniProtKB Unreviewed (TrEMBL); UniParc	16	Solanum tuberosum (Potato); Nicotiana tabacum (Common tobacco); Nicotiana sylvestris (Wood tobacco); Nicotiana attenuata (Coyote tobacco); Capsicum annuum (Capsicum pepper); Capsicum baccatum (Peruvian pepper); Solanum chilense (Tomato); Solanum lycopersicum (Tomato); Nicotiana tomentosiformis; Solanum pennellii		aconitate hydratase, cytoplasmic	107086	2820.81	4	81	8.3588	2.8764	384	31.5352	true	[BLASTED, MAPPED, ANNOTATED]	tr|A0A3Q7J2T1|A0A3Q7J2T1_SOLLC	Aconitate hydratase OS=Solanum lycopersicum OX=4081 GN=101248455 PE=3 SV=1	981	20	0	96.07	8	P:GO:0006099; P:GO:0006101; F:GO:0003994; F:GO:0046872; F:GO:0047780; F:GO:0051539; C:GO:0005739; C:GO:0005829	P:tricarboxylic acid cycle; P:citrate metabolic process; F:aconitate hydratase activity; F:metal ion binding; F:citrate dehydratase activity; F:4 iron, 4 sulfur cluster binding; C:mitochondrion; C:cytosol	EC:4.2.1.3	Aconitate hydratase
157	A0A3Q7HCJ1_SOLLC	A0A3Q7HCJ1	UniRef90_M1D6A3	Cluster: ADP/ATP translocase	UniProtKB Unreviewed (TrEMBL); UniParc	15	Solanum tuberosum (Potato); Nicotiana tabacum (Common tobacco); Capsicum chinense (Scotch bonnet); Nicotiana sylvestris (Wood tobacco); Capsicum annuum (Capsicum pepper); Solanum chacoense (Chaco potato); Solanum chilense (Tomato); Capsicum baccatum (Peruvian pepper); Nicotiana attenuata (Coyote tobacco); Solanum lycopersicum (Tomato); Solanum stenotomum; Solanum verrucosum; Solanum pennellii		ADP,ATP carrier protein 1, mitochondrial-like	41545	2804.81	4	35	9.3995	2.2829	145	37.5652	true	[BLASTED, MAPPED, ANNOTATED]	tr|A0A3Q7HCJ1|A0A3Q7HCJ1_SOLLC	Uncharacterized protein OS=Solanum lycopersicum OX=4081 GN=101247934 PE=3 SV=1	383	20	0	94.78	5	P:GO:0140021; P:GO:1990544; F:GO:0005471; C:GO:0005743; C:GO:0016021	P:mitochondrial ADP transmembrane transport; P:mitochondrial ATP transmembrane transport; F:ATP:ADP antiporter activity; C:mitochondrial inner membrane; C:integral component of membrane	EC:7	Translocases
158	A0A3Q7HGM6_SOLLC	A0A3Q7HGM6	UniRef90_A0A3Q7HGM6	Cluster: Phosphoenolpyruvate carboxylase	UniProtKB Unreviewed (TrEMBL); UniParc	9	Solanum lycopersicum (Tomato); Capsicum annuum (Capsicum pepper); Capsicum baccatum (Peruvian pepper); Capsicum chinense (Scotch bonnet); Solanum chilense (Tomato); Solanum pennellii		phosphoenolpyruvate carboxylase-like	110292	2645.08	4	95	5.1867	3.0243	514	36.1396	true	[BLASTED, MAPPED, ANNOTATED]	tr|A0A3Q7HGM6|A0A3Q7HGM6_SOLLC	Phosphoenolpyruvate carboxylase OS=Solanum lycopersicum OX=4081 GN=101267723 PE=3 SV=1	964	20	0	97.17	7	P:GO:0006099; P:GO:0015977; P:GO:0048366; F:GO:0008964; C:GO:0005829; C:GO:0009507; C:GO:0048046	P:tricarboxylic acid cycle; P:carbon fixation; P:leaf development; F:phosphoenolpyruvate carboxylase activity; C:cytosol; C:chloroplast; C:apoplast	EC:4.1.1.31; EC:4.1.1.32	Phosphoenolpyruvate carboxylase; Phosphoenolpyruvate carboxykinase (GTP)
159	A0A3Q7HGJ9_SOLLC	A0A3Q7HGJ9	UniRef90_A0A3Q7HGJ9	Cluster: Phosphoglycerate kinase	UniProtKB Unreviewed (TrEMBL); UniParc	8	Solanum lycopersicum (Tomato); Solanum habrochaites (Wild tomato); [Lycopersicon] peruvianum var. humifusum; Solanum pimpinellifolium (Currant tomato); Solanum chilense (Tomato); Solanum peruvianum (Peruvian tomato)		Phosphoglycerate kinase, chloroplastic	92665	2033.06	4	76	6.9083	9.9252	241	39.0672	true	[BLASTED, MAPPED, ANNOTATED]	tr|A0A3Q7HGJ9|A0A3Q7HGJ9_SOLLC	Phosphoglycerate kinase OS=Solanum lycopersicum OX=4081 PE=3 SV=1	883	20	0	94.21	3	P:GO:0006096; F:GO:0004618; F:GO:0005524	P:glycolytic process; F:phosphoglycerate kinase activity; F:ATP binding	EC:2.7.2.3	Phosphoglycerate kinase
160	A0A3Q7HIP9_SOLLC	A0A3Q7HIP9	UniRef90_A0A3Q7HIP9	Cluster: Protein disulfide-isomerase	UniProtKB Unreviewed (TrEMBL); UniParc	2	Solanum lycopersicum (Tomato)		ATP-dependent zinc metalloprotease FTSH 9, chloroplastic	145992	1615.41	4	116	5.2751	10.7689	285	34.8639	true	[BLASTED, MAPPED, ANNOTATED]	tr|A0A3Q7HIP9|A0A3Q7HIP9_SOLLC	Protein disulfide-isomerase OS=Solanum lycopersicum OX=4081 PE=3 SV=1	1327	20	0	82.92	9	P:GO:0006508; F:GO:0003756; F:GO:0004176; F:GO:0004222; F:GO:0005524; F:GO:0008270; C:GO:0005788; C:GO:0009534; C:GO:0016021	P:proteolysis; F:protein disulfide isomerase activity; F:ATP-dependent peptidase activity; F:metalloendopeptidase activity; F:ATP binding; F:zinc ion binding; C:endoplasmic reticulum lumen; C:chloroplast thylakoid; C:integral component of membrane	EC:5.3.4.1; EC:3.4.24	Protein disulfide-isomerase; Acting on peptide bonds (peptidases)
161	B1N678_SOLLC	B1N678	UniRef90_A0A6N2ARA6	Cluster: Knot1 domain-containing protein	UniProtKB Unreviewed (TrEMBL); UniParc	12	Solanum chilense (Tomato); Solanum lycopersicum (Tomato); Solanum lycopersicum var. cerasiforme; Solanum chacoense (Chaco potato); Solanum pimpinellifolium (Currant tomato); Solanum tuberosum (Potato); Solanum stenotomum; Solanum verrucosum; Solanum pennellii		Defensin-like protein	8439	22415.1	3	6	43.4211	1.0162	86	12.2174	true	[BLASTED, MAPPED, ANNOTATED]	tr|B1N678|B1N678_SOLLC	Defensin protein OS=Solanum lycopersicum OX=4081 GN=543741 PE=4 SV=1	76	20	1.72921e-47	92.17	1	P:GO:0006952	P:defense response
162	A0A3Q7IIZ3_SOLLC	A0A3Q7IIZ3	UniRef90_O82013	Cluster: 17.3 kDa class II heat shock protein	UniProtKB Reviewed (Swiss-Prot); UniProtKB Unreviewed (TrEMBL); UniParc	38	Solanum peruvianum (Peruvian tomato); Solanum chacoense (Chaco potato); Capsicum baccatum (Peruvian pepper); Capsicum annuum (Capsicum pepper); Solanum tuberosum (Potato); Capsicum chinense (Scotch bonnet); Solanum lycopersicum (Tomato); Nicotiana sylvestris (Wood tobacco); Nicotiana tabacum (Common tobacco); Nicotiana attenuata (Coyote tobacco); Escherichia coli; Solanum verrucosum		17.3 kDa class II heat shock protein-like	17323	16642	3	13	27.7419	1.4859	209	22.9155	true	[BLASTED, MAPPED, ANNOTATED]	tr|A0A3Q7IIZ3|A0A3Q7IIZ3_SOLLC	SHSP domain-containing protein OS=Solanum lycopersicum OX=4081 GN=543572 PE=3 SV=1	155	20	1.9869e-109	93.97	8	P:GO:0006457; P:GO:0009408; P:GO:0009651; P:GO:0042542; P:GO:0051259; F:GO:0043621; F:GO:0051082; C:GO:0005737	P:protein folding; P:response to heat; P:response to salt stress; P:response to hydrogen peroxide; P:protein complex oligomerization; F:protein self-association; F:unfolded protein binding; C:cytoplasm
163	A0A3Q7FZI2_SOLLC	A0A3Q7FZI2	UniRef90_P93210	Cluster: 14-3-3 protein 5	UniProtKB Reviewed (Swiss-Prot); UniProtKB Unreviewed (TrEMBL); UniParc	18	Solanum lycopersicum (Tomato); Nicotiana tabacum (Common tobacco); Solanum tuberosum (Potato); Capsicum baccatum (Peruvian pepper); Solanum chilense (Tomato); Nicotiana attenuata (Coyote tobacco); Solanum chacoense (Chaco potato); Nicotiana sylvestris (Wood tobacco); Solanum pennellii		14-3-3 protein	28777	6435.33	3	30	12.9412	5.3619	90	23.1175	true	[BLASTED]	tr|A0A3Q7FZI2|A0A3Q7FZI2_SOLLC	14_3_3 domain-containing protein OS=Solanum lycopersicum OX=4081 GN=543565 PE=3 SV=1	255	20	0	98.03
164	14333_SOLLC	P93209	UniRef90_P93209	Cluster: 14-3-3 protein 3	UniProtKB Reviewed (Swiss-Prot); UniProtKB Unreviewed (TrEMBL); UniParc	19	Solanum lycopersicum (Tomato); Nicotiana tabacum (Common tobacco); Solanum chilense (Tomato); Nicotiana sylvestris (Wood tobacco); Nicotiana attenuata (Coyote tobacco); Solanum tuberosum (Potato); Capsicum baccatum (Peruvian pepper); Capsicum chinense (Scotch bonnet); Capsicum annuum (Capsicum pepper); Solanum chacoense (Chaco potato); Kribbella monticola; Solanum stenotomum		14-3-3-like protein	29286	6068.86	3	33	12.6923	4.9017	105	24.7719	true	[BLASTED]	sp|P93209|14333_SOLLC	14-3-3 protein 3 OS=Solanum lycopersicum OX=4081 GN=TFT3 PE=2 SV=1	260	20	0	97.31
165	CYPH_SOLLC	P21568	UniRef90_P21568	Cluster: Peptidyl-prolyl cis-trans isomerase	UniProtKB Reviewed (Swiss-Prot); UniProtKB Unreviewed (TrEMBL); UniParc	29	Solanum lycopersicum (Tomato); Capsicum annuum (Capsicum pepper); Solanum commersonii (Commerson's wild potato); Nicotiana attenuata (Coyote tobacco); Solanum chilense (Tomato); Solanum chacoense (Chaco potato); Capsicum chinense (Scotch bonnet); Capsicum baccatum (Peruvian pepper); Nicotiana tabacum (Common tobacco); Nicotiana sylvestris (Wood tobacco); Solanum tuberosum (Potato); Solanum rostra…		peptidyl-prolyl cis-trans isomerase	17898	5680.99	3	15	16.9591	0.9821	83	25.1781	true	[BLASTED, MAPPED, ANNOTATED]	sp|P21568|CYPH_SOLLC	Peptidyl-prolyl cis-trans isomerase OS=Solanum lycopersicum OX=4081 GN=CYP PE=2 SV=1	171	20	1.15281e-121	97.28	10	P:GO:0000413; P:GO:0006457; F:GO:0003755; F:GO:0016018; C:GO:0005774; C:GO:0005794; C:GO:0005829; C:GO:0005886; C:GO:0009507; C:GO:0048046	P:protein peptidyl-prolyl isomerization; P:protein folding; F:peptidyl-prolyl cis-trans isomerase activity; F:cyclosporin A binding; C:vacuolar membrane; C:Golgi apparatus; C:cytosol; C:plasma membrane; C:chloroplast; C:apoplast	EC:5.2.1.8	Peptidylprolyl isomerase
166	A0A3Q7GNQ9_SOLLC	A0A3Q7GNQ9	UniRef90_M0ZV99	Cluster: Actin depolymerizing factor 3	UniProtKB Unreviewed (TrEMBL); UniParc	14	Solanum tuberosum (Potato); Solanum lycopersicum (Tomato); Solanum chilense (Tomato); Nicotiana tabacum (Common tobacco); Nicotiana sylvestris (Wood tobacco); Nicotiana attenuata (Coyote tobacco); Capsicum annuum (Capsicum pepper); Capsicum baccatum (Peruvian pepper); Capsicum chinense (Scotch bonnet); Solanum stenotomum; Solanum verrucosum		actin-depolymerizing factor 2-like	15836	4817.74	3	11	20.438	0.276	61	34.5383	true	[BLASTED, MAPPED, ANNOTATED]	tr|A0A3Q7GNQ9|A0A3Q7GNQ9_SOLLC	ADF-H domain-containing protein OS=Solanum lycopersicum OX=4081 GN=101251888 PE=3 SV=1	137	20	1.4296e-96	95.92	5	P:GO:0030042; P:GO:0090378; F:GO:0051015; C:GO:0005737; C:GO:0015629	P:actin filament depolymerization; P:seed trichome elongation; F:actin filament binding; C:cytoplasm; C:actin cytoskeleton
167	14310_SOLLC	P93207	UniRef90_P93207	Cluster: 14-3-3 protein 10	UniProtKB Reviewed (Swiss-Prot); UniProtKB Unreviewed (TrEMBL); UniParc	13	Solanum lycopersicum (Tomato); Solanum chilense (Tomato); Capsicum chinense (Scotch bonnet); Capsicum baccatum (Peruvian pepper); Capsicum annuum (Capsicum pepper); Nicotiana tabacum (Common tobacco); Nicotiana sylvestris (Wood tobacco); Petunia hybrida (Petunia); Nicotiana attenuata (Coyote tobacco); Mojavia dolomitestris; Ipomoea triloba		14-3-3 protein 10	28606	4669.36	3	27	13.0952	2.3538	187	34.7601	true	[BLASTED]	sp|P93207|14310_SOLLC	14-3-3 protein 10 OS=Solanum lycopersicum OX=4081 GN=TFT10 PE=2 SV=2	252	20	0	97.39
168	A0A3Q7F9P0_SOLLC	A0A3Q7F9P0	UniRef90_A0A3Q7F9P0	Cluster: SHSP domain-containing protein	UniProtKB Unreviewed (TrEMBL); UniParc	10	Solanum lycopersicum (Tomato); Solanum tuberosum (Potato); Solanum chilense (Tomato); Solanum pennellii; Solanum verrucosum; Solanum stenotomum		22.0 kDa class IV heat shock protein-like	21630	4557.86	3	17	15.3439	0.8897	77	20.6826	true	[BLASTED, MAPPED, ANNOTATED]	tr|A0A3Q7F9P0|A0A3Q7F9P0_SOLLC	SHSP domain-containing protein OS=Solanum lycopersicum OX=4081 GN=101254946 PE=3 SV=1	189	20	5.47166e-134	88.44	8	P:GO:0006457; P:GO:0009408; P:GO:0009651; P:GO:0042542; P:GO:0051259; F:GO:0043621; F:GO:0051082; C:GO:0005737	P:protein folding; P:response to heat; P:response to salt stress; P:response to hydrogen peroxide; P:protein complex oligomerization; F:protein self-association; F:unfolded protein binding; C:cytoplasm
169	A0A3Q7FK75_SOLLC	A0A3Q7FK75	UniRef90_A0A022PTJ0	Cluster: Cytochrome b5 heme-binding domain-containing protein	UniProtKB Unreviewed (TrEMBL); UniParc	10	Erythranthe guttata (Yellow monkey flower); Sesamum indicum (Oriental sesame); Camellia sinensis (Tea); Solanum lycopersicum (Tomato); Solanum chilense (Tomato); Handroanthus impetiginosus; Phtheirospermum japonicum; Pistacia vera; Salvia hispanica		cytochrome b5	15215	4316.52	3	15	20.1493	2.5243	54	33.1481	true	[BLASTED, MAPPED, ANNOTATED]	tr|A0A3Q7FK75|A0A3Q7FK75_SOLLC	Cytochrome b5 heme-binding domain-containing protein OS=Solanum lycopersicum OX=4081 PE=3 SV=1	134	20	2.97223e-95	95.45	7	P:GO:0022900; F:GO:0004128; F:GO:0009055; F:GO:0020037; F:GO:0046872; C:GO:0016021; C:GO:0043231	P:electron transport chain; F:cytochrome-b5 reductase activity, acting on NAD(P)H; F:electron transfer activity; F:heme binding; F:metal ion binding; C:integral component of membrane; C:intracellular membrane-bounded organelle	EC:1.6.2.2	Cytochrome-b5 reductase
170	Q3I5C4_SOLLC	Q3I5C4	UniRef90_Q52QQ4	Cluster: Ascorbate peroxidase	UniProtKB Unreviewed (TrEMBL); UniParc	45	Solanum lycopersicum (Tomato); Capsicum annuum (Capsicum pepper); Capsicum chinense (Scotch bonnet); Solanum tuberosum (Potato); Capsicum baccatum (Peruvian pepper); Picrorhiza kurrooa; Solanum chacoense (Chaco potato); Nicotiana sylvestris (Wood tobacco); Sesamum indicum (Oriental sesame); Coffea arabica (Arabian coffee); Solanum melongena (Eggplant); Rehmannia glutinosa (Chinese foxglove); Lyci…		ascorbate peroxidase	27390	3897.89	3	22	16.8	0.9525	156	27.9807	true	[BLASTED, MAPPED, ANNOTATED]	tr|Q3I5C4|Q3I5C4_SOLLC	Cytosolic ascorbate peroxidase 1 OS=Solanum lycopersicum OX=4081 GN=APX1 PE=2 SV=1	250	20	0	97.24	9	P:GO:0000302; P:GO:0034599; P:GO:0042744; P:GO:0098869; F:GO:0016688; F:GO:0020037; F:GO:0046872; C:GO:0005576; C:GO:0009507	P:response to reactive oxygen species; P:cellular response to oxidative stress; P:hydrogen peroxide catabolic process; P:cellular oxidant detoxification; F:L-ascorbate peroxidase activity; F:heme binding; F:metal ion binding; C:extracellular region; C:chloroplast	EC:1.11.1.11	L-ascorbate peroxidase
171	A0A3Q7EH12_SOLLC	A0A3Q7EH12	UniRef90_A0A3Q7EH12	Cluster: GTP-binding protein SAR1A	UniProtKB Unreviewed (TrEMBL); UniParc	20	Solanum lycopersicum (Tomato); Solanum chilense (Tomato); Rhododendron williamsianum; Actinidia chinensis var. chinensis (Chinese soft-hair kiwi); Rhododendron simsii (Sims's rhododendron); Salvia splendens (Scarlet sage); Olea europaea subsp. europaea; Nyssa sinensis; Camellia sinensis var. sinensis; Schima superba; Solanum tuberosum (Potato); Solanum chacoense (Chaco potato); Camellia sinensis;…		GTP-binding protein SAR1A-like	21910	3777.04	3	21	18.1347	1.0275	126	33.9837	true	[BLASTED, MAPPED, ANNOTATED]	tr|A0A3Q7EH12|A0A3Q7EH12_SOLLC	Uncharacterized protein OS=Solanum lycopersicum OX=4081 GN=101244805 PE=3 SV=1	193	20	4.49367e-139	99.46	7	P:GO:0003400; P:GO:0070863; F:GO:0003924; F:GO:0005525; C:GO:0005794; C:GO:0030127; C:GO:0070971	P:regulation of COPII vesicle coating; P:positive regulation of protein exit from endoplasmic reticulum; F:GTPase activity; F:GTP binding; C:Golgi apparatus; C:COPII vesicle coat; C:endoplasmic reticulum exit site	EC:3.6.1	Acting on acid anhydrides
172	A0A3Q7EQ86_SOLLC	A0A3Q7EQ86	UniRef90_A0A1S4AVH1	Cluster: GTP-binding protein SAR1A	UniProtKB Unreviewed (TrEMBL); UniParc	11	Nicotiana tabacum (Common tobacco); Nicotiana attenuata (Coyote tobacco); Nicotiana sylvestris (Wood tobacco); Nicotiana plumbaginifolia (Leadwort-leaved tobacco); Actinidia chinensis var. chinensis (Chinese soft-hair kiwi); Solanum tuberosum (Potato); Solanum chacoense (Chaco potato); Solanum lycopersicum (Tomato); Nicotiana tomentosiformis; Ipomoea triloba		GTP-binding protein SAR1A	22021	3611.94	3	21	18.1347	8.934	129	36.0608	true	[BLASTED, MAPPED, ANNOTATED]	tr|A0A3Q7EQ86|A0A3Q7EQ86_SOLLC	Uncharacterized protein OS=Solanum lycopersicum OX=4081 GN=101244997 PE=3 SV=1	193	20	6.73113e-140	99.66	7	P:GO:0003400; P:GO:0070863; F:GO:0003924; F:GO:0005525; C:GO:0005794; C:GO:0030127; C:GO:0070971	P:regulation of COPII vesicle coating; P:positive regulation of protein exit from endoplasmic reticulum; F:GTPase activity; F:GTP binding; C:Golgi apparatus; C:COPII vesicle coat; C:endoplasmic reticulum exit site	EC:3.6.1	Acting on acid anhydrides
173	A0A3Q7HZQ4_SOLLC	A0A3Q7HZQ4	UniRef90_A0A3Q7HZQ4	Cluster: V-type proton ATPase subunit H	UniProtKB Unreviewed (TrEMBL)	1	Solanum lycopersicum (Tomato)		V-type proton ATPase subunit H-like	53742	3493.9	3	50	8.2452	3.2704	187	36.0205	true	[BLASTED, MAPPED, ANNOTATED]	tr|A0A3Q7HZQ4|A0A3Q7HZQ4_SOLLC	V-type proton ATPase subunit H OS=Solanum lycopersicum OX=4081 PE=3 SV=1	473	20	0	85.74	4	P:GO:1902600; F:GO:0020037; F:GO:0046961; C:GO:0000221	P:proton transmembrane transport; F:heme binding; F:proton-transporting ATPase activity, rotational mechanism; C:vacuolar proton-transporting V-type ATPase, V1 domain	EC:7.1.3.1	H(+)-exporting diphosphatase
174	A0A3Q7EB31_SOLLC	A0A3Q7EB31	UniRef90_A0A3Q7EB31	Cluster: Ricin B-type lectin domain-containing protein	UniProtKB Unreviewed (TrEMBL); UniParc	9	Solanum lycopersicum (Tomato); Solanum tuberosum (Potato); Solanum pennellii; Solanum verrucosum; Solanum stenotomum		Hop-interacting protein THI113	38227	3481.58	3	29	14.7147	1.8534	193	31.5183	true	[BLASTED, MAPPED, ANNOTATED]	tr|A0A3Q7EB31|A0A3Q7EB31_SOLLC	Uncharacterized protein OS=Solanum lycopersicum OX=4081 PE=4 SV=1	333	20	0	84.78	1	F:GO:0030246	F:carbohydrate binding
175	A0A3Q7GBW7_SOLLC	A0A3Q7GBW7	UniRef90_A0A3Q7GBW7	Cluster: Catalase	UniProtKB Unreviewed (TrEMBL)	1	Solanum lycopersicum (Tomato)		catalase isozyme 3	109135	3358.33	3	76	4.3933	23.0673	144	31.2417	true	[BLASTED, MAPPED, ANNOTATED]	tr|A0A3Q7GBW7|A0A3Q7GBW7_SOLLC	Catalase OS=Solanum lycopersicum OX=4081 PE=3 SV=1	956	20	0	94.1	8	P:GO:0042542; P:GO:0042744; P:GO:0098869; F:GO:0004096; F:GO:0020037; F:GO:0046872; C:GO:0005777; C:GO:0005886	P:response to hydrogen peroxide; P:hydrogen peroxide catabolic process; P:cellular oxidant detoxification; F:catalase activity; F:heme binding; F:metal ion binding; C:peroxisome; C:plasma membrane	EC:1.11.1.6	Catalase
176	A0A3Q7EVZ0_SOLLC	A0A3Q7EVZ0	UniRef90_O24030	Cluster: Proteasome subunit alpha type-7	UniProtKB Reviewed (Swiss-Prot); UniProtKB Unreviewed (TrEMBL)	8	Solanum lycopersicum (Tomato); Solanum tuberosum (Potato); Solanum chilense (Tomato); Spirodela intermedia (Intermediate duckweed); Solanum chacoense (Chaco potato)		proteasome subunit alpha type-7	27082	3284.38	3	22	17.2691	0.5578	100	27.7253	true	[BLASTED, MAPPED, ANNOTATED]	tr|A0A3Q7EVZ0|A0A3Q7EVZ0_SOLLC	Proteasome subunit alpha type OS=Solanum lycopersicum OX=4081 GN=544128 PE=3 SV=1	249	20	0	99.1	5	P:GO:0006511; P:GO:0010498; C:GO:0005634; C:GO:0005737; C:GO:0019773	P:ubiquitin-dependent protein catabolic process; P:proteasomal protein catabolic process; C:nucleus; C:cytoplasm; C:proteasome core complex, alpha-subunit complex
177	A0A3Q7IRS4_SOLLC	A0A3Q7IRS4	UniRef90_P19595	Cluster: UTP--glucose-1-phosphate uridylyltransferase	UniProtKB Reviewed (Swiss-Prot); UniProtKB Unreviewed (TrEMBL); UniParc	27	Solanum tuberosum (Potato); Solanum chacoense (Chaco potato); Nicotiana attenuata (Coyote tobacco); Solanum chilense (Tomato); Capsicum baccatum (Peruvian pepper); Capsicum annuum (Capsicum pepper); Solanum lycopersicum (Tomato); Nicotiana sylvestris (Wood tobacco); Nicotiana tabacum (Common tobacco); Ipomoea batatas (Sweet potato); Solanum verrucosum; Solanum pennellii; Solanum stenotomum; Nicot…		UTP--glucose-1-phosphate uridylyltransferase	51786	2887.46	3	43	9.0147	3.2339	240	36.596	true	[BLASTED, MAPPED, ANNOTATED]	tr|A0A3Q7IRS4|A0A3Q7IRS4_SOLLC	UTP--glucose-1-phosphate uridylyltransferase OS=Solanum lycopersicum OX=4081 GN=101248935 PE=3 SV=1	477	20	0	98.38	6	P:GO:0005977; P:GO:0006011; F:GO:0003676; F:GO:0003983; F:GO:0008270; C:GO:0005737	P:glycogen metabolic process; P:UDP-glucose metabolic process; F:nucleic acid binding; F:UTP:glucose-1-phosphate uridylyltransferase activity; F:zinc ion binding; C:cytoplasm	EC:2.7.7.64; EC:2.7.7.9	UTP-monosaccharide-1-phosphate uridylyltransferase; UTP--glucose-1-phosphate uridylyltransferase
178	A0A3Q7IUI9_SOLLC	A0A3Q7IUI9	UniRef90_A0A3Q7GQM4	Cluster: Elongation factor 1-gamma 2	UniProtKB Unreviewed (TrEMBL); UniParc	30	Solanum lycopersicum (Tomato); Capsicum annuum (Capsicum pepper); Capsicum baccatum (Peruvian pepper); Solanum tuberosum (Potato); Solanum chilense (Tomato); Solanum chacoense (Chaco potato); Solanum verrucosum; Solanum pennellii; Solanum stenotomum; Escherichia coli		elongation factor 1-gamma 2-like	47305	2709.39	3	41	9.1787	9.9285	162	35.0353	true	[BLASTED, MAPPED, ANNOTATED]	tr|A0A3Q7IUI9|A0A3Q7IUI9_SOLLC	Uncharacterized protein OS=Solanum lycopersicum OX=4081 GN=101249702 PE=4 SV=1	414	20	0	94.34	4	P:GO:0006414; P:GO:0006749; F:GO:0003746; F:GO:0004364	P:translational elongation; P:glutathione metabolic process; F:translation elongation factor activity; F:glutathione transferase activity	EC:2.5.1.18	Glutathione transferase
179	A0A3Q7I7T0_SOLLC	A0A3Q7I7T0	UniRef90_A0A3Q7I7T0	Cluster: Aldo_ket_red domain-containing protein	UniProtKB Unreviewed (TrEMBL); UniParc	2	Solanum lycopersicum (Tomato); Mojavia dolomitestris		aldo-keto reductase 1	73064	2696.6	3	68	6.6667	10.6384	258	37.905	true	[BLASTED, MAPPED, ANNOTATED]	tr|A0A3Q7I7T0|A0A3Q7I7T0_SOLLC	Uncharacterized protein OS=Solanum lycopersicum OX=4081 PE=4 SV=1	660	20	0	78.15	2	F:GO:0047834; C:GO:0005829	F:D-threo-aldose 1-dehydrogenase activity; C:cytosol	EC:1.1.1.122	D-threo-aldose 1-dehydrogenase
180	SAR2_SOLLC	P52884	UniRef90_P52884	Cluster: GTP-binding protein SAR2	UniProtKB Reviewed (Swiss-Prot); UniProtKB Unreviewed (TrEMBL); UniParc	20	Solanum lycopersicum (Tomato); Solanum chilense (Tomato); Capsicum baccatum (Peruvian pepper); Capsicum chinense (Scotch bonnet); Capsicum annuum (Capsicum pepper); Nicotiana tabacum (Common tobacco); Nicotiana sylvestris (Wood tobacco); Nicotiana attenuata (Coyote tobacco); Solanum tuberosum (Potato); Solanum chacoense (Chaco potato); Phtheirospermum japonicum; Nicotiana tomentosiformis; Solanum…		GTP-binding protein SAR1A	21909	2652.48	3	21	18.1347	3.7331	75	31.2131	true	[BLASTED, MAPPED, ANNOTATED]	sp|P52884|SAR2_SOLLC	GTP-binding protein SAR2 OS=Solanum lycopersicum OX=4081 GN=SAR2 PE=2 SV=1	193	20	1.43244e-140	97.33	7	P:GO:0003400; P:GO:0070863; F:GO:0003924; F:GO:0005525; C:GO:0005794; C:GO:0030127; C:GO:0070971	P:regulation of COPII vesicle coating; P:positive regulation of protein exit from endoplasmic reticulum; F:GTPase activity; F:GTP binding; C:Golgi apparatus; C:COPII vesicle coat; C:endoplasmic reticulum exit site	EC:3.6.1	Acting on acid anhydrides
181	A0A3Q7ITD1_SOLLC	A0A3Q7ITD1	UniRef90_Q43497	Cluster: Monodehydroascorbate reductase	UniProtKB Reviewed (Swiss-Prot); UniProtKB Unreviewed (TrEMBL); UniParc	18	Solanum lycopersicum (Tomato); Solanum chacoense (Chaco potato); Nicotiana sylvestris (Wood tobacco); Nicotiana tabacum (Common tobacco); Nicotiana attenuata (Coyote tobacco); Solanum tuberosum (Potato); Capsicum annuum (Capsicum pepper); Solanum chilense (Tomato); Capsicum baccatum (Peruvian pepper); Capsicum chinense (Scotch bonnet); Solanum pennellii; Solanum stenotomum; Solanum verrucosum		monodehydroascorbate reductase	46992	2635.24	3	38	9.0069	10.2448	204	34.0357	true	[BLASTED, MAPPED, ANNOTATED]	tr|A0A3Q7ITD1|A0A3Q7ITD1_SOLLC	Pyr_redox_2 domain-containing protein OS=Solanum lycopersicum OX=4081 GN=101264360 PE=4 SV=1	433	20	0	97.02	9	P:GO:0046686; P:GO:0098869; F:GO:0003729; F:GO:0016656; F:GO:0050660; C:GO:0005782; C:GO:0005886; C:GO:0009507; C:GO:0048046	P:response to cadmium ion; P:cellular oxidant detoxification; F:mRNA binding; F:monodehydroascorbate reductase (NADH) activity; F:flavin adenine dinucleotide binding; C:peroxisomal matrix; C:plasma membrane; C:chloroplast; C:apoplast	EC:1.6.5.4	Monodehydroascorbate reductase (NADH)
182	A0A3Q7GQM4_SOLLC	A0A3Q7GQM4	UniRef90_A0A3Q7GQM4	Cluster: Elongation factor 1-gamma 2	UniProtKB Unreviewed (TrEMBL); UniParc	30	Solanum lycopersicum (Tomato); Capsicum annuum (Capsicum pepper); Capsicum baccatum (Peruvian pepper); Solanum tuberosum (Potato); Solanum chilense (Tomato); Solanum chacoense (Chaco potato); Solanum verrucosum; Solanum pennellii; Solanum stenotomum; Escherichia coli		elongation factor 1-gamma 2-like isoform X1	47022	2563.18	3	37	9.201	8.0139	134	24.9329	true	[BLASTED, MAPPED, ANNOTATED]	tr|A0A3Q7GQM4|A0A3Q7GQM4_SOLLC	Uncharacterized protein OS=Solanum lycopersicum OX=4081 GN=101248107 PE=4 SV=1	413	20	0	96.03	4	P:GO:0006414; P:GO:0006749; F:GO:0003746; F:GO:0004364	P:translational elongation; P:glutathione metabolic process; F:translation elongation factor activity; F:glutathione transferase activity	EC:2.5.1.18	Glutathione transferase
183	A0A3Q7EUS0_SOLLC	A0A3Q7EUS0	UniRef90_A0A3Q7EUS0	Cluster: PCI domain-containing protein	UniProtKB Unreviewed (TrEMBL); UniParc	9	Solanum lycopersicum (Tomato); Solanum tuberosum (Potato); Nicotiana attenuata (Coyote tobacco); Nicotiana tabacum (Common tobacco); Nicotiana sylvestris (Wood tobacco); Solanum chilense (Tomato); Nicotiana tomentosiformis; Solanum pennellii		probable 26S proteasome non-ATPase regulatory subunit 3	55328	2523.42	3	53	7.3922	4.4081	209	33.0518	true	[BLASTED, MAPPED, ANNOTATED]	tr|A0A3Q7EUS0|A0A3Q7EUS0_SOLLC	PCI domain-containing protein OS=Solanum lycopersicum OX=4081 GN=101244534 PE=3 SV=1	487	20	0	95.24	7	P:GO:0006511; P:GO:0042176; P:GO:0050790; F:GO:0003677; F:GO:0030234; C:GO:0005634; C:GO:0008541	P:ubiquitin-dependent protein catabolic process; P:regulation of protein catabolic process; P:regulation of catalytic activity; F:DNA binding; F:enzyme regulator activity; C:nucleus; C:proteasome regulatory particle, lid subcomplex
184	A0A3Q7FV90_SOLLC	A0A3Q7FV90	UniRef90_A0A3Q7FV90	Cluster: Vicilin-like seed storage protein At2g18540	UniProtKB Unreviewed (TrEMBL); UniParc	2	Solanum lycopersicum (Tomato); Solanum pennellii		vicilin-like seed storage protein At2g18540	80619	2242.05	3	89	7.0073	1.3661	186	35.5164	true	[BLASTED, MAPPED, ANNOTATED]	tr|A0A3Q7FV90|A0A3Q7FV90_SOLLC	Uncharacterized protein OS=Solanum lycopersicum OX=4081 GN=101256744 PE=4 SV=1	685	20	0	87	3	P:GO:0006413; F:GO:0003743; C:GO:0016021	P:translational initiation; F:translation initiation factor activity; C:integral component of membrane
185	A0A3Q7I956_SOLLC	A0A3Q7I956	UniRef90_A0A3Q7I956	Cluster: Chaperonin Cpn	UniProtKB Unreviewed (TrEMBL); UniParc	13	Solanum lycopersicum (Tomato); Capsicum baccatum (Peruvian pepper); Solanum chilense (Tomato); Capsicum annuum (Capsicum pepper); Capsicum chinense (Scotch bonnet); Solanum tuberosum (Potato); Solanum chacoense (Chaco potato); Solanum stenotomum; Solanum verrucosum		chaperonin CPN60-2, mitochondrial	61521	2221.99	3	55	8.4629	8.4696	219	35.1143	true	[BLASTED, MAPPED, ANNOTATED]	tr|A0A3Q7I956|A0A3Q7I956_SOLLC	Uncharacterized protein OS=Solanum lycopersicum OX=4081 GN=101250927 PE=3 SV=1	579	20	0	96.96	10	P:GO:0042026; F:GO:0003723; F:GO:0005507; F:GO:0005524; C:GO:0005739; C:GO:0005774; C:GO:0005829; C:GO:0005886; C:GO:0009570; C:GO:0009941	P:protein refolding; F:RNA binding; F:copper ion binding; F:ATP binding; C:mitochondrion; C:vacuolar membrane; C:cytosol; C:plasma membrane; C:chloroplast stroma; C:chloroplast envelope
186	A0A3Q7H376_SOLLC	A0A3Q7H376	UniRef90_A0A3Q7H376	Cluster: RuBisCO large subunit-binding protein subunit alpha, chloroplastic	UniProtKB Unreviewed (TrEMBL); UniParc	17	Solanum lycopersicum (Tomato); Solanum chacoense (Chaco potato); Solanum tuberosum (Potato); Capsicum chinense (Scotch bonnet); Nicotiana attenuata (Coyote tobacco); Nicotiana tabacum (Common tobacco); Capsicum baccatum (Peruvian pepper); Solanum chilense (Tomato); Capsicum annuum (Capsicum pepper); Solanum pennellii; Solanum verrucosum; Nicotiana tomentosiformis; Solanum stenotomum		ruBisCO large subunit-binding protein subunit alpha-like	65844	1725.02	3	56	7.2464	14.8344	207	42.0593	true	[BLASTED, MAPPED, ANNOTATED]	tr|A0A3Q7H376|A0A3Q7H376_SOLLC	Uncharacterized protein OS=Solanum lycopersicum OX=4081 PE=3 SV=1	621	20	0	95.34	2	P:GO:0042026; F:GO:0005524	P:protein refolding; F:ATP binding
187	A0A494G9E6_SOLLC	A0A494G9E6	UniRef90_A0A1L6J9Y2	Cluster: ATP synthase subunit alpha	UniProtKB Unreviewed (TrEMBL); UniParc	86	Sphingomonas koreensis; Solanum lycopersicum (Tomato); Sphingomonas sp. TF3; Sphingomonas sp. NBWT7; Sphingomonas gilva; Sphingomonas sp. HMP6; Sphingomonas oligophenolica; Sphingomonas sp. Leaf231; Alphaproteobacteria bacterium HGW-Alphaproteobacteria-16; Sphingomonas alpina; Sphingomonas panacisoli; Sphingomonas sp. 32-66-10; Sphingomonas sp; Sphingomonas glacialis; Sphingomonas taxi; Sphingomo…		F0F1 ATP synthase subunit alpha	54502	1658.36	3	46	5.3045	28.0683	149	49.1853	true	[BLASTED, MAPPED, ANNOTATED]	tr|A0A494G9E6|A0A494G9E6_SOLLC	ATP synthase subunit alpha OS=Solanum lycopersicum OX=4081 PE=3 SV=1	509	20	0	97.35	9	P:GO:0015986; F:GO:0005524; F:GO:0016787; F:GO:0043531; F:GO:0046933; F:GO:0046961; C:GO:0005886; C:GO:0009507; C:GO:0045261	P:ATP synthesis coupled proton transport; F:ATP binding; F:hydrolase activity; F:ADP binding; F:proton-transporting ATP synthase activity, rotational mechanism; F:proton-transporting ATPase activity, rotational mechanism; C:plasma membrane; C:chloroplast; C:proton-transporting ATP synthase complex, catalytic core F(1)	EC:7.1.3.1; EC:7.1.2.2; EC:3; EC:6	H(+)-exporting diphosphatase; H(+)-transporting two-sector ATPase; Hydrolases; Ligases
188	A0A3Q7J5K6_SOLLC	A0A3Q7J5K6	UniRef90_P29196	Cluster: Phosphoenolpyruvate carboxylase	UniProtKB Reviewed (Swiss-Prot); UniProtKB Unreviewed (TrEMBL); UniParc	28	Solanum tuberosum (Potato); Solanum lycopersicum (Tomato); Corchorus capsularis (Jute); Corchorus olitorius; Nicotiana tabacum (Common tobacco); Nicotiana sylvestris (Wood tobacco); Nicotiana attenuata (Coyote tobacco); Capsicum chinense (Scotch bonnet); Capsicum annuum (Capsicum pepper); Capsicum baccatum (Peruvian pepper); Sesamum indicum (Oriental sesame); Solanum chilense (Tomato); Solanum pe…		phosphoenolpyruvate carboxylase	130297	1380.22	3	120	3.2314	4.3452	315	33.7518	true	[BLASTED, MAPPED, ANNOTATED]	tr|A0A3Q7J5K6|A0A3Q7J5K6_SOLLC	Phosphoenolpyruvate carboxylase OS=Solanum lycopersicum OX=4081 PE=3 SV=1	1145	20	0	97.57	8	P:GO:0006099; P:GO:0015977; P:GO:0015979; P:GO:0048366; F:GO:0008964; C:GO:0005829; C:GO:0009507; C:GO:0048046	P:tricarboxylic acid cycle; P:carbon fixation; P:photosynthesis; P:leaf development; F:phosphoenolpyruvate carboxylase activity; C:cytosol; C:chloroplast; C:apoplast	EC:4.1.1.31; EC:4.1.1.32	Phosphoenolpyruvate carboxylase; Phosphoenolpyruvate carboxykinase (GTP)
189	A0A3Q7H1V5_SOLLC	A0A3Q7H1V5	UniRef90_P51846	Cluster: Pyruvate decarboxylase 2	UniProtKB Reviewed (Swiss-Prot); UniProtKB Unreviewed (TrEMBL); UniParc	21	Nicotiana tabacum (Common tobacco); Nicotiana sylvestris (Wood tobacco); Nicotiana attenuata (Coyote tobacco); Solanum lycopersicum (Tomato); Solanum chilense (Tomato); Capsicum chinense (Scotch bonnet); Capsicum baccatum (Peruvian pepper); Petunia hybrida (Petunia); Solanum tuberosum (Potato); Solanum pennellii; Solanum stenotomum; Solanum verrucosum		pyruvate decarboxylase 2	66737	1069.49	3	46	3.9216	9.5708	108	40.7245	true	[BLASTED, MAPPED, ANNOTATED]	tr|A0A3Q7H1V5|A0A3Q7H1V5_SOLLC	Pyruvate decarboxylase OS=Solanum lycopersicum OX=4081 GN=101254910 PE=3 SV=1	612	20	0	94.69	7	P:GO:0080182; F:GO:0000287; F:GO:0003682; F:GO:0004737; F:GO:0030976; C:GO:0005829; C:GO:0048188	P:histone H3-K4 trimethylation; F:magnesium ion binding; F:chromatin binding; F:pyruvate decarboxylase activity; F:thiamine pyrophosphate binding; C:cytosol; C:Set1C/COMPASS complex	EC:4.1.1.1	Pyruvate decarboxylase
190	Q7M1T1_SOLLC	Q7M1T1	UniRef90_A0A3Q7HTE7	Cluster: AAI domain-containing protein	UniProtKB Unreviewed (TrEMBL); UniParc	8	Solanum lycopersicum (Tomato); Solanum chilense (Tomato); Solanum stenotomum; Solanum pennellii; Solanum tuberosum		2S sulfur-rich seed storage protein 2	3942	39470.1	2	3	75	0.7985	57	7.4168	true	[BLASTED, MAPPED, ANNOTATED]	tr|Q7M1T1|Q7M1T1_SOLLC	Seed storage protein Lec2SA1 small chain (Fragment) OS=Solanum lycopersicum OX=4081 PE=1 SV=1	32	3	5.85731e-10	98.96	1	F:GO:0045735	F:nutrient reservoir activity
191	A0A3Q7HSF7_SOLLC	A0A3Q7HSF7	UniRef90_A0A3Q7HSF7	Cluster: AAI domain-containing protein	UniProtKB Unreviewed (TrEMBL)	1	Solanum lycopersicum (Tomato)		14 kDa proline-rich protein DC2.15-like	11413	7072.67	2	6	40.7407	1.0915	87	26.738	true	[BLASTED]	tr|A0A3Q7HSF7|A0A3Q7HSF7_SOLLC	AAI domain-containing protein OS=Solanum lycopersicum OX=4081 PE=4 SV=1	108	20	6.17706e-61	75.05
192	A0A494G9I5_SOLLC	A0A494G9I5	UniRef90_A0A494G9I5	Cluster: Bet_v_1 domain-containing protein	UniProtKB Unreviewed (TrEMBL)	1	Solanum lycopersicum (Tomato)		kirola-like	16555	4555.2	2	11	18.4932	0.2535	59	35.8834	true	[BLASTED, MAPPED, ANNOTATED]	tr|A0A494G9I5|A0A494G9I5_SOLLC	Bet_v_1 domain-containing protein OS=Solanum lycopersicum OX=4081 PE=4 SV=1	146	20	7.15112e-101	82.59	1	P:GO:0006952	P:defense response
193	A0A3Q7I868_SOLLC	A0A3Q7I868	UniRef90_P16231	Cluster: Wound-induced proteinase inhibitor 1	UniProtKB Reviewed (Swiss-Prot); UniProtKB Unreviewed (TrEMBL)	3	Solanum peruvianum (Peruvian tomato); Solanum lycopersicum (Tomato); Solanum chilense (Tomato)		proteinase inhibitor I	12572	4459.14	2	12	26.1261	0.9307	71	36.0404	true	[BLASTED, MAPPED, ANNOTATED]	tr|A0A3Q7I868|A0A3Q7I868_SOLLC	Uncharacterized protein OS=Solanum lycopersicum OX=4081 GN=101247557 PE=3 SV=1	111	20	5.07785e-75	88.43	4	P:GO:0009611; P:GO:0010951; F:GO:0004867; C:GO:0005576	P:response to wounding; P:negative regulation of endopeptidase activity; F:serine-type endopeptidase inhibitor activity; C:extracellular region
194	A0A3Q7EIY6_SOLLC	A0A3Q7EIY6	UniRef90_A0A3Q7EIY6	Cluster: ATP synthase subunit O, mitochondrial	UniProtKB Unreviewed (TrEMBL); UniParc	15	Solanum lycopersicum (Tomato); Solanum tuberosum (Potato); Solanum chacoense (Chaco potato); Solanum chilense (Tomato); Nicotiana tabacum (Common tobacco); Nicotiana attenuata (Coyote tobacco); Capsicum baccatum (Peruvian pepper); Capsicum chinense (Scotch bonnet); Capsicum annuum (Capsicum pepper); Solanum pennellii; Solanum verrucosum; Solanum stenotomum		ATP synthase subunit O, mitochondrial	26458	3816.9	2	29	12.1339	0.9518	113	30.0611	true	[BLASTED, MAPPED, ANNOTATED]	tr|A0A3Q7EIY6|A0A3Q7EIY6_SOLLC	Uncharacterized protein OS=Solanum lycopersicum OX=4081 GN=101244808 PE=3 SV=1	239	20	4.1032e-172	92.63	4	P:GO:0042776; F:GO:0046933; C:GO:0000274; C:GO:0045261	P:mitochondrial ATP synthesis coupled proton transport; F:proton-transporting ATP synthase activity, rotational mechanism; C:mitochondrial proton-transporting ATP synthase, stator stalk; C:proton-transporting ATP synthase complex, catalytic core F(1)	EC:7.1.2.2; EC:6	H(+)-transporting two-sector ATPase; Ligases
195	Q9SMD3_SOLLC	Q9SMD3	UniRef90_Q52QQ4	Cluster: Ascorbate peroxidase	UniProtKB Unreviewed (TrEMBL); UniParc	45	Solanum lycopersicum (Tomato); Capsicum annuum (Capsicum pepper); Capsicum chinense (Scotch bonnet); Solanum tuberosum (Potato); Capsicum baccatum (Peruvian pepper); Picrorhiza kurrooa; Solanum chacoense (Chaco potato); Nicotiana sylvestris (Wood tobacco); Sesamum indicum (Oriental sesame); Coffea arabica (Arabian coffee); Solanum melongena (Eggplant); Rehmannia glutinosa (Chinese foxglove); Lyci…		ascorbate peroxidase	27446	3469.18	2	21	12.8	1.2236	148	28.8095	true	[BLASTED, MAPPED, ANNOTATED]	tr|Q9SMD3|Q9SMD3_SOLLC	Ascorbate peroxidase OS=Solanum lycopersicum OX=4081 GN=Apx PE=3 SV=1	250	20	0	96.94	9	P:GO:0000302; P:GO:0034599; P:GO:0042744; P:GO:0098869; F:GO:0016688; F:GO:0020037; F:GO:0046872; C:GO:0005576; C:GO:0009507	P:response to reactive oxygen species; P:cellular response to oxidative stress; P:hydrogen peroxide catabolic process; P:cellular oxidant detoxification; F:L-ascorbate peroxidase activity; F:heme binding; F:metal ion binding; C:extracellular region; C:chloroplast	EC:1.11.1.11	L-ascorbate peroxidase
196	K4BB06_SOLLC	K4BB06	UniRef90_O82531	Cluster: Proteasome subunit beta type-1	UniProtKB Reviewed (Swiss-Prot); UniProtKB Unreviewed (TrEMBL); UniParc	39	Petunia hybrida (Petunia); Cuscuta australis; Nicotiana tabacum (Common tobacco); Nicotiana attenuata (Coyote tobacco); Nicotiana sylvestris (Wood tobacco); Capsicum annuum (Capsicum pepper); Capsicum chinense (Scotch bonnet); Solanum tuberosum (Potato); Solanum chacoense (Chaco potato); Cuscuta campestris; Solanum lycopersicum (Tomato); Solanum chilense (Tomato); Capsicum baccatum (Peruvian pepp…		proteasome subunit beta type-1	24588	3341.35	2	19	19.7309	0.8611	124	33.4482	true	[BLASTED, MAPPED, ANNOTATED]	tr|K4BB06|K4BB06_SOLLC	Proteasome subunit beta OS=Solanum lycopersicum OX=4081 GN=101266585 PE=3 SV=1	223	20	3.8919e-166	98.67	5	P:GO:0010498; F:GO:0004298; C:GO:0005634; C:GO:0005737; C:GO:0019774	P:proteasomal protein catabolic process; F:threonine-type endopeptidase activity; C:nucleus; C:cytoplasm; C:proteasome core complex, beta-subunit complex	EC:3.4.25	Acting on peptide bonds (peptidases)
197	A0A3Q7FF75_SOLLC	A0A3Q7FF75	UniRef90_A0A3Q7FF75	Cluster: LysM domain-containing GPI-anchored protein 2	UniProtKB Unreviewed (TrEMBL); UniParc	10	Solanum lycopersicum (Tomato); Solanum chacoense (Chaco potato); Solanum tuberosum (Potato); Solanum chilense (Tomato); Solanum verrucosum; Solanum stenotomum; Solanum pennellii		lysM domain-containing GPI-anchored protein 2	37217	3279.91	2	18	8.4058	1.0674	71	30.0092	true	[BLASTED, MAPPED, ANNOTATED]	tr|A0A3Q7FF75|A0A3Q7FF75_SOLLC	Uncharacterized protein OS=Solanum lycopersicum OX=4081 GN=101253732 PE=4 SV=1	345	20	0	86.03	4	F:GO:0008061; C:GO:0009506; C:GO:0016021; C:GO:0046658	F:chitin binding; C:plasmodesma; C:integral component of membrane; C:anchored component of plasma membrane
198	Q40133_SOLLC	Q40133	UniRef90_Q9LEG3	Cluster: Putative alcohol dehydrogenase	UniProtKB Unreviewed (TrEMBL); UniParc	4	Solanum lycopersicum (Tomato); Solanum chilense (Tomato); Solanum pennellii		short-chain dehydrogenase reductase 3b-like	26185	3263.92	2	16	11.9522	2.975	92	26.0521	true	[BLASTED, MAPPED, ANNOTATED]	tr|Q40133|Q40133_SOLLC	Alcohol dehydrogenase homolog (Fragment) OS=Solanum lycopersicum OX=4081 GN=GAD3 PE=2 SV=1	251	20	1.03865e-178	93.08	1	F:GO:0016491	F:oxidoreductase activity	EC:1	Oxidoreductases
199	Q7Y240_SOLLC	Q7Y240	UniRef90_Q7Y240	Cluster: Glutaredoxin-dependent peroxiredoxin	UniProtKB Unreviewed (TrEMBL); UniParc	19	Solanum lycopersicum (Tomato); Solanum chacoense (Chaco potato); Nicotiana benthamiana; Nicotiana sylvestris (Wood tobacco); Phanerochaete pseudomagnoliae; Solanum tuberosum (Potato); Capsicum baccatum (Peruvian pepper); Capsicum annuum (Capsicum pepper); Nicotiana tabacum (Common tobacco); Capsicum chinense (Scotch bonnet); Nicotiana attenuata (Coyote tobacco); Solanum chilense (Tomato); Solanum…		thioredoxin peroxidase 1	17425	3167.93	2	10	15.4321	7.2583	87	34.306	true	[BLASTED, MAPPED, ANNOTATED]	tr|Q7Y240|Q7Y240_SOLLC	Glutaredoxin-dependent peroxiredoxin OS=Solanum lycopersicum OX=4081 GN=TPx1 PE=2 SV=1	162	20	1.13991e-114	97.5	6	P:GO:0034599; P:GO:0042744; P:GO:0045454; P:GO:0098869; F:GO:0008379; C:GO:0005737	P:cellular response to oxidative stress; P:hydrogen peroxide catabolic process; P:cell redox homeostasis; P:cellular oxidant detoxification; F:thioredoxin peroxidase activity; C:cytoplasm	EC:1.11.1.24	Thioredoxin-dependent peroxiredoxin
200	A0A3Q7EMV9_SOLLC	A0A3Q7EMV9	UniRef90_A0A3Q7EMV9	Cluster: Glucose and ribitol dehydrogenase	UniProtKB Unreviewed (TrEMBL); UniParc	10	Solanum lycopersicum (Tomato); Solanum chilense (Tomato); Solanum tuberosum (Potato); Solanum stenotomum; Solanum pennellii; Solanum verrucosum		Glucose and ribitol dehydrogenase -like protein	37035	3092.38	2	27	10.2941	2.8569	122	29.0132	true	[BLASTED, MAPPED, ANNOTATED]	tr|A0A3Q7EMV9|A0A3Q7EMV9_SOLLC	Uncharacterized protein OS=Solanum lycopersicum OX=4081 GN=101262257 PE=4 SV=1	340	20	0	95.19	1	F:GO:0016491	F:oxidoreductase activity	EC:1	Oxidoreductases
201	A0A494G8J8_SOLLC	A0A494G8J8	UniRef90_P80496	Cluster: ATP synthase 27 kDa subunit, mitochondrial (Fragment)	UniProtKB Reviewed (Swiss-Prot); UniProtKB Unreviewed (TrEMBL); UniParc	15	Solanum tuberosum (Potato); Solanum chacoense (Chaco potato); Nicotiana tabacum (Common tobacco); Nicotiana sylvestris (Wood tobacco); Solanum lycopersicum (Tomato); Solanum chilense (Tomato); Nicotiana attenuata (Coyote tobacco); Solanum verrucosum; Nicotiana tomentosiformis; Solanum pennellii; Solanum stenotomum		probable ATP synthase 24 kDa subunit, mitochondrial	27696	2877.29	2	26	11.157	0.6627	102	26.1122	true	[BLASTED, MAPPED, ANNOTATED]	tr|A0A494G8J8|A0A494G8J8_SOLLC	Uncharacterized protein OS=Solanum lycopersicum OX=4081 PE=4 SV=1	242	20	1.0341e-170	93.51	1	P:GO:0009555	P:pollen development
202	A0A3Q7F2F3_SOLLC	A0A3Q7F2F3	UniRef90_M1BWH6	Cluster: Proteasome subunit alpha type	UniProtKB Unreviewed (TrEMBL); UniParc	98	Solanum tuberosum (Potato); Solanum chacoense (Chaco potato); Solanum lycopersicum (Tomato); Solanum chilense (Tomato); Nicotiana tabacum (Common tobacco); Cinnamomum micranthum f. kanehirae; Gossypium barbadense (Sea-island cotton); Gossypium tomentosum (Hawaiian cotton); Gossypium hirsutum (Upland cotton); Gossypium darwinii (Darwin's cotton); Glycine max (Soybean); Glycine soja (Wild soybean);…		proteasome subunit alpha type-5	26081	2835.65	2	20	9.7046	19.7375	113	33.8887	true	[BLASTED, MAPPED, ANNOTATED]	tr|A0A3Q7F2F3|A0A3Q7F2F3_SOLLC	Proteasome subunit alpha type OS=Solanum lycopersicum OX=4081 GN=101247093 PE=3 SV=1	237	20	1.8339e-174	99.64	5	P:GO:0043161; F:GO:0016787; C:GO:0005634; C:GO:0005737; C:GO:0019773	P:proteasome-mediated ubiquitin-dependent protein catabolic process; F:hydrolase activity; C:nucleus; C:cytoplasm; C:proteasome core complex, alpha-subunit complex	EC:3	Hydrolases
203	RBS3B_SOLLC	P93214	UniRef90_P93214	Cluster: 14-3-3 protein 9	UniProtKB Reviewed (Swiss-Prot); UniProtKB Unreviewed (TrEMBL); UniParc	16	Solanum lycopersicum (Tomato); Capsicum annuum (Capsicum pepper); Solanum tuberosum (Potato); Capsicum baccatum (Peruvian pepper); Nicotiana tabacum (Common tobacco); Capsicum chinense (Scotch bonnet); Nicotiana attenuata (Coyote tobacco); Nicotiana sylvestris (Wood tobacco); Solanum chacoense (Chaco potato); Solanum chilense (Tomato); Solanum pennellii; Solanum verrucosum		ribulose bisphosphate carboxylase small chain, chloroplastic	20199	2813.97	2	18	14.4444	1.1862	52	25.1506	true	[BLASTED, MAPPED, ANNOTATED]	sp|P05349|RBS4_SOLLC	Ribulose bisphosphate carboxylase small chain 3B_ chloroplastic OS=Solanum lycopersicum OX=4081 GN=RBCS-3B PE=3 SV=1	180	20	3.99669e-133	98.17	7	P:GO:0009853; P:GO:0019253; P:GO:0051607; F:GO:0005515; C:GO:0009506; C:GO:0009507; C:GO:0019034	P:photorespiration; P:reductive pentose-phosphate cycle; P:defense response to virus; F:protein binding; C:plasmodesma; C:chloroplast; C:viral replication complex
204	A0A3Q7E7D4_SOLLC	A0A3Q7E7D4	UniRef90_A0A3Q7E7D4	Cluster: Mitochondrial dicarboxylate/tricarboxylate transporter DTC	UniProtKB Unreviewed (TrEMBL); UniParc	16	Solanum lycopersicum (Tomato); Striga asiatica (Asiatic witchweed); Tripterygium wilfordii (Thunder God vine); Solanum chilense (Tomato); Solanum tuberosum (Potato); Phtheirospermum japonicum; Ipomoea nil; Solanum pennellii; Solanum verrucosum		mitochondrial dicarboxylate/tricarboxylate transporter DTC-like	31733	2618.93	2	21	12.1212	1.7639	109	32.0922	true	[BLASTED, MAPPED, ANNOTATED]	tr|A0A3Q7E7D4|A0A3Q7E7D4_SOLLC	Uncharacterized protein OS=Solanum lycopersicum OX=4081 GN=778218 PE=3 SV=1	297	20	0	97.41	5	P:GO:0015742; P:GO:0071423; F:GO:0015367; C:GO:0005739; C:GO:0016021	P:alpha-ketoglutarate transport; P:malate transmembrane transport; F:oxoglutarate:malate antiporter activity; C:mitochondrion; C:integral component of membrane	EC:7	Translocases
205	A0A3Q7HZY2_SOLLC	A0A3Q7HZY2	UniRef90_A0A3Q7HZY2	Cluster: Senescence-associated protein	UniProtKB Unreviewed (TrEMBL); UniParc	18	Solanum lycopersicum (Tomato); Withania somnifera; Capsicum annuum (Capsicum pepper); Capsicum baccatum (Peruvian pepper); Nicotiana tabacum (Common tobacco); Solanum tuberosum (Potato); Solanum chacoense (Chaco potato); Solanum chilense (Tomato); Nicotiana sylvestris (Wood tobacco); Nicotiana attenuata (Coyote tobacco); Solanum verrucosum; Solanum stenotomum; Solanum pennellii		tetraspanin-8-like	30101	2540.72	2	19	8.2707	1.0347	94	32.9795	true	[BLASTED, MAPPED, ANNOTATED]	tr|A0A3Q7HZY2|A0A3Q7HZY2_SOLLC	Uncharacterized protein OS=Solanum lycopersicum OX=4081 GN=101258870 PE=3 SV=1	266	20	0	94.43	4	P:GO:0009734; C:GO:0005886; C:GO:0009506; C:GO:0016021	P:auxin-activated signaling pathway; C:plasma membrane; C:plasmodesma; C:integral component of membrane
206	A0A3Q7EYM6_SOLLC	A0A3Q7EYM6	UniRef90_A0A3Q7EYM6	Cluster: Fructose-bisphosphate aldolase	UniProtKB Unreviewed (TrEMBL); UniParc	25	Solanum lycopersicum (Tomato); Solanum chilense (Tomato); Lactuca sativa (Garden lettuce); Macleaya cordata; Nitriliruptoraceae bacterium ZYF776; Nicotiana tabacum (Common tobacco); Daucus carota subsp. sativus (Carrot); Solanum tuberosum (Potato); Nicotiana sylvestris (Wood tobacco); Nicotiana paniculata; Nicotiana attenuata (Coyote tobacco); Thalictrum thalictroides (Rue-anemone); Erythranthe g…		fructose-bisphosphate aldolase 1, chloroplastic-like	42643	2435.79	2	29	12.9114	0.8996	128	42.7496	true	[BLASTED, MAPPED, ANNOTATED]	tr|A0A3Q7EYM6|A0A3Q7EYM6_SOLLC	Fructose-bisphosphate aldolase OS=Solanum lycopersicum OX=4081 GN=101249787 PE=3 SV=1	395	20	0	96.46	4	P:GO:0006096; P:GO:0030388; F:GO:0004332; C:GO:0005829	P:glycolytic process; P:fructose 1,6-bisphosphate metabolic process; F:fructose-bisphosphate aldolase activity; C:cytosol	EC:4.1.2.13	Fructose-bisphosphate aldolase
207	A0A3Q7ENN4_SOLLC	A0A3Q7ENN4	UniRef90_Q6DUX3	Cluster: Translationally-controlled tumor protein homolog	UniProtKB Reviewed (Swiss-Prot); UniProtKB Unreviewed (TrEMBL); UniParc	6	Solanum lycopersicum (Tomato); Solanum chilense (Tomato); Solanum pennellii		translationally-controlled tumor protein homolog	18920	2427.98	2	21	11.3095	5.219	79	43.3407	true	[BLASTED, MAPPED, ANNOTATED]	tr|A0A3Q7ENN4|A0A3Q7ENN4_SOLLC	TCTP domain-containing protein OS=Solanum lycopersicum OX=4081 GN=101255927 PE=3 SV=1	168	20	5.82247e-119	96.37	4	P:GO:0032502; P:GO:0042127; F:GO:0005509; C:GO:0005737	P:developmental process; P:regulation of cell population proliferation; F:calcium ion binding; C:cytoplasm
208	A0A3Q7IB34_SOLLC	A0A3Q7IB34	UniRef90_A0A3Q7IB34	Cluster: PHB domain-containing protein	UniProtKB Unreviewed (TrEMBL)	1	Solanum lycopersicum (Tomato)		pre-rRNA-processing protein ESF2-like	67995	2392.05	2	56	4.91	10.3045	261	38.9496	true	[BLASTED, MAPPED, ANNOTATED]	tr|A0A3Q7IB34|A0A3Q7IB34_SOLLC	PHB domain-containing protein OS=Solanum lycopersicum OX=4081 PE=3 SV=1	611	20	9.18716e-173	84.78	6	P:GO:0000447; P:GO:0000472; P:GO:0000480; P:GO:0034462; F:GO:0003723; C:GO:0005730	P:endonucleolytic cleavage in ITS1 to separate SSU-rRNA from 5.8S rRNA and LSU-rRNA from tricistronic rRNA transcript (SSU-rRNA, 5.8S rRNA, LSU-rRNA); P:endonucleolytic cleavage to generate mature 5'-end of SSU-rRNA from (SSU-rRNA, 5.8S rRNA, LSU-rRNA); P:endonucleolytic cleavage in 5'-ETS of tricistronic rRNA transcript (SSU-rRNA, 5.8S rRNA, LSU-rRNA); P:small-subunit processome assembly; F:RNA …
209	A0A3Q7ENW6_SOLLC	A0A3Q7ENW6	UniRef90_A0A3Q7ENW6	Cluster: Usp domain-containing protein	UniProtKB Unreviewed (TrEMBL); UniParc	20	Solanum lycopersicum (Tomato); Solanum chilense (Tomato); Capsicum chinense (Scotch bonnet); Capsicum annuum (Capsicum pepper); Solanum tuberosum (Potato); Solanum chacoense (Chaco potato); Solanum verrucosum; Solanum stenotomum; Solanum pennellii		universal stress protein A-like protein isoform X2	18026	2296.8	2	15	10.8434	10.7872	46	26.6581	true	[BLASTED]	tr|A0A3Q7ENW6|A0A3Q7ENW6_SOLLC	Usp domain-containing protein OS=Solanum lycopersicum OX=4081 GN=101245588 PE=4 SV=1	166	20	9.55414e-119	93.55
210	A0A3Q7GM08_SOLLC	A0A3Q7GM08	UniRef90_M1C3G7	Cluster: Aldehyde dehydrogenase (NAD(+))	UniProtKB Unreviewed (TrEMBL); UniParc	11	Solanum tuberosum (Potato); Solanum chilense (Tomato); Solanum lycopersicum (Tomato); Solanum chacoense (Chaco potato); Solanum verrucosum; Solanum pennellii; Solanum stenotomum		aldehyde dehydrogenase family 7 member B4	56104	2262.25	2	41	6.8702	12.0748	231	41.5661	true	[BLASTED, MAPPED, ANNOTATED]	tr|A0A3Q7GM08|A0A3Q7GM08_SOLLC	Aldedh domain-containing protein OS=Solanum lycopersicum OX=4081 PE=3 SV=1	524	20	0	92.61	2	F:GO:0004029; F:GO:0043878	F:aldehyde dehydrogenase (NAD+) activity; F:glyceraldehyde-3-phosphate dehydrogenase (NAD+) (non-phosphorylating) activity	EC:1.2.1.5; EC:1.2.1.3	Aldehyde dehydrogenase (NAD(P)(+)); Aldehyde dehydrogenase (NAD(+))
211	A0A3Q7GTM3_SOLLC	A0A3Q7GTM3	UniRef90_M1CJJ5	Cluster: Delta-1-pyrroline-5-carboxylate synthase	UniProtKB Unreviewed (TrEMBL); UniParc	17	Solanum tuberosum (Potato); Capsicum annuum (Capsicum pepper); Nicotiana tabacum (Common tobacco); Solanum lycopersicum (Tomato); Nicotiana attenuata (Coyote tobacco); Solanum verrucosum; Solanum stenotomum		delta-1-pyrroline-5-carboxylate synthase-like isoform X2	77430	2166.7	2	66	6.2762	3.3203	230	40.326	true	[BLASTED, MAPPED, ANNOTATED]	tr|A0A3Q7GTM3|A0A3Q7GTM3_SOLLC	Delta-1-pyrroline-5-carboxylate synthase OS=Solanum lycopersicum OX=4081 GN=101244293 PE=3 SV=1	717	20	0	96.46	6	P:GO:0016310; P:GO:0055129; F:GO:0004349; F:GO:0004350; F:GO:0005524; C:GO:0005737	P:phosphorylation; P:L-proline biosynthetic process; F:glutamate 5-kinase activity; F:glutamate-5-semialdehyde dehydrogenase activity; F:ATP binding; C:cytoplasm	EC:1.2.1.41; EC:2.7.2.11	Glutamate-5-semialdehyde dehydrogenase; Glutamate 5-kinase
212	Q41215_SOLLC	Q41215	UniRef90_P29000	Cluster: Acid beta-fructofuranosidase	UniProtKB Reviewed (Swiss-Prot); UniProtKB Unreviewed (TrEMBL); UniParc	39	Solanum lycopersicum (Tomato); Solanum galapagense; Solanum cheesmaniae (Galapagos Island tomato); Solanum pimpinellifolium (Currant tomato); Solanum chacoense (Chaco potato); Solanum tuberosum (Potato); Solanum habrochaites (Wild tomato); Solanum arcanum; Solanum chilense (Tomato); Solanum peruvianum (Peruvian tomato); Cucumis melo (Muskmelon); Solanum corneliomuelleri; Solanum lycopersicum var.…		acid vacuolar invertase	70118	1986.82	2	44	2.5157	3.8283	161	37.2592	true	[BLASTED, MAPPED, ANNOTATED]	tr|Q41215|Q41215_SOLLC	Beta-fructofuranosidase OS=Solanum lycopersicum OX=4081 GN=acid invertase: AI PE=2 SV=1	636	20	0	98.32	4	P:GO:0005985; F:GO:0004575; C:GO:0005775; C:GO:0016021	P:sucrose metabolic process; F:sucrose alpha-glucosidase activity; C:vacuolar lumen; C:integral component of membrane	EC:3.2.1.20; EC:3.2.1.26; EC:3.2.1.48	Alpha-glucosidase; Beta-fructofuranosidase; Sucrose alpha-glucosidase
213	A0A3Q7FHW8_SOLLC	A0A3Q7FHW8	UniRef90_A0A3Q7FHW8	Cluster: Voltage-dependent anion-selective channel	UniProtKB Unreviewed (TrEMBL); UniParc	16	Solanum lycopersicum (Tomato); Musa acuminata (Banana); Nicotiana tabacum (Common tobacco); Nicotiana sylvestris (Wood tobacco); Solanum chilense (Tomato); Capsicum chinense (Scotch bonnet); Solanum tuberosum (Potato); Nicotiana attenuata (Coyote tobacco); Capsicum annuum (Capsicum pepper); Nicotiana tomentosiformis; Solanum pennellii		mitochondrial outer membrane protein porin of 34 kDa	36355	1876.45	2	26	6.8047	0.9813	117	34.6427	true	[BLASTED, MAPPED, ANNOTATED]	tr|A0A3Q7FHW8|A0A3Q7FHW8_SOLLC	Uncharacterized protein OS=Solanum lycopersicum OX=4081 PE=3 SV=1	338	20	0	95.09	6	P:GO:0015698; P:GO:0098656; F:GO:0008308; F:GO:0015288; C:GO:0005741; C:GO:0046930	P:inorganic anion transport; P:anion transmembrane transport; F:voltage-gated anion channel activity; F:porin activity; C:mitochondrial outer membrane; C:pore complex	EC:7	Translocases
214	A0A3Q7GYN8_SOLLC	A0A3Q7GYN8	UniRef90_A0A3Q7GYN8	Cluster: Patellin-3-like	UniProtKB Unreviewed (TrEMBL); UniParc	10	Solanum lycopersicum (Tomato); Solanum chilense (Tomato); Solanum chacoense (Chaco potato); Solanum tuberosum (Potato); Solanum pennellii; Solanum verrucosum; Solanum stenotomum		patellin-3-like	64771	1703.98	2	64	3.7931	23.6053	231	37.4381	true	[BLASTED, MAPPED, ANNOTATED]	tr|A0A3Q7GYN8|A0A3Q7GYN8_SOLLC	Uncharacterized protein OS=Solanum lycopersicum OX=4081 GN=101263525 PE=3 SV=1	580	20	0	85.79	3	P:GO:0007049; P:GO:0051301; F:GO:0008289	P:cell cycle; P:cell division; F:lipid binding
215	A0A3Q7FR28_SOLLC	A0A3Q7FR28	UniRef90_A0A2G2ZW06	Cluster: Programmed cell death protein 4	UniProtKB Unreviewed (TrEMBL); UniParc	26	Capsicum annuum (Capsicum pepper); Solanum chilense (Tomato); Capsicum chinense (Scotch bonnet); Capsicum baccatum (Peruvian pepper); Nicotiana tabacum (Common tobacco); Solanum lycopersicum (Tomato); Nicotiana attenuata (Coyote tobacco); Nicotiana sylvestris (Wood tobacco); Solanum chacoense (Chaco potato); Mojavia dolomitestris; Solanum verrucosum; Solanum pennellii; Solanum stenotomum; Nicotia…		putative UDP-N-acetylglucosamine--peptide N-acetylglucosaminyltransferase kDa subunit-like isoform X1	78571	1701.58	2	65	5.7343	6.1005	183	39.1499	true	[BLASTED, MAPPED, ANNOTATED]	tr|A0A3Q7FR28|A0A3Q7FR28_SOLLC	Uncharacterized protein OS=Solanum lycopersicum OX=4081 PE=3 SV=1	715	20	0	95.65	3	P:GO:0006417; P:GO:0045892; C:GO:0005737	P:regulation of translation; P:negative regulation of transcription, DNA-templated; C:cytoplasm
216	A0A3Q7EMP9_SOLLC	A0A3Q7EMP9	UniRef90_A0A3Q7I245	Cluster: EF1_GNE domain-containing protein	UniProtKB Unreviewed (TrEMBL); UniParc	23	Solanum lycopersicum (Tomato); Solanum chilense (Tomato); Solanum tuberosum (Potato); Solanum chacoense (Chaco potato); Capsicum annuum (Capsicum pepper); Capsicum chinense (Scotch bonnet); Solanum stenotomum; Solanum pennellii; Solanum verrucosum		elongation factor 1-delta 1-like isoform X1	26101	1650.52	2	19	5.8091	11.7886	108	44.875	true	[BLASTED, MAPPED, ANNOTATED]	tr|A0A3Q7EMP9|A0A3Q7EMP9_SOLLC	EF1_GNE domain-containing protein OS=Solanum lycopersicum OX=4081 PE=3 SV=1	241	20	3.90261e-167	96.9	6	P:GO:0006414; P:GO:0050790; F:GO:0003746; F:GO:0005085; C:GO:0005829; C:GO:0005853	P:translational elongation; P:regulation of catalytic activity; F:translation elongation factor activity; F:guanyl-nucleotide exchange factor activity; C:cytosol; C:eukaryotic translation elongation factor 1 complex
217	A0A3Q7HN01_SOLLC	A0A3Q7HN01	UniRef90_Q43191	Cluster: Probable linoleate 9S-lipoxygenase 5	UniProtKB Reviewed (Swiss-Prot); UniProtKB Unreviewed (TrEMBL); UniParc	17	Solanum tuberosum (Potato); Solanum chacoense (Chaco potato); Capsicum annuum (Capsicum pepper); Capsicum chinense (Scotch bonnet); Solanum lycopersicum (Tomato); Capsicum baccatum (Peruvian pepper); Solanum chilense (Tomato); Solanum stenotomum; Solanum pennellii; Solanum verrucosum		probable linoleate 9S-lipoxygenase 5	97613	1361.35	2	81	1.5099	28.68	227	46.4262	true	[BLASTED, MAPPED, ANNOTATED]	tr|A0A3Q7HN01|A0A3Q7HN01_SOLLC	Lipoxygenase OS=Solanum lycopersicum OX=4081 GN=101263535 PE=3 SV=1	861	20	0	95.22	6	P:GO:0006633; P:GO:0031408; P:GO:0034440; F:GO:0046872; F:GO:1990136; C:GO:0005737	P:fatty acid biosynthetic process; P:oxylipin biosynthetic process; P:lipid oxidation; F:metal ion binding; F:linoleate 9S-lipoxygenase activity; C:cytoplasm	EC:1.13.11.58	Linoleate 9S-lipoxygenase
218	A0A3Q7FX22_SOLLC	A0A3Q7FX22	UniRef90_A0A3Q7FX22	Cluster: Malic enzyme	UniProtKB Unreviewed (TrEMBL); UniParc	5	Solanum lycopersicum (Tomato); Solanum tuberosum (Potato); Nymphaea colorata		ABC transporter G family member 35-like	232262	1260.36	2	188	0.8228	14.6629	260	46.0715	true	[BLASTED, MAPPED, ANNOTATED]	tr|A0A3Q7FX22|A0A3Q7FX22_SOLLC	Malic enzyme OS=Solanum lycopersicum OX=4081 PE=3 SV=1	2066	20	0	93.52	9	P:GO:0055085; F:GO:0003677; F:GO:0004471; F:GO:0005524; F:GO:0008270; F:GO:0051287; F:GO:0140359; C:GO:0005634; C:GO:0016021	P:transmembrane transport; F:DNA binding; F:malate dehydrogenase (decarboxylating) (NAD+) activity; F:ATP binding; F:zinc ion binding; F:NAD binding; F:ABC-type transporter activity; C:nucleus; C:integral component of membrane	EC:1.1.1.38; EC:1.1.1.39; EC:7	Malate dehydrogenase (oxaloacetate-decarboxylating); Malate dehydrogenase (decarboxylating); Translocases
219	A0A3Q7FWZ9_SOLLC	A0A3Q7FWZ9	UniRef90_A0A3Q7FWZ9	Cluster: RuBisCO large subunit-binding protein subunit beta, chloroplastic	UniProtKB Unreviewed (TrEMBL); UniParc	18	Solanum lycopersicum (Tomato); Solanum tuberosum (Potato); Capsicum baccatum (Peruvian pepper); Nicotiana tabacum (Common tobacco); Nicotiana sylvestris (Wood tobacco); Solanum chilense (Tomato); Capsicum chinense (Scotch bonnet); Capsicum annuum (Capsicum pepper); Nicotiana attenuata (Coyote tobacco); Solanum chacoense (Chaco potato); Solanum verrucosum; Solanum pennellii; Solanum stenotomum		ruBisCO large subunit-binding protein subunit beta, chloroplastic	65325	1239.64	2	55	3.0945	6.7249	136	41.3004	true	[BLASTED, MAPPED, ANNOTATED]	tr|A0A3Q7FWZ9|A0A3Q7FWZ9_SOLLC	Uncharacterized protein OS=Solanum lycopersicum OX=4081 PE=3 SV=1	614	20	0	94.54	2	P:GO:0042026; F:GO:0005524	P:protein refolding; F:ATP binding
220	K4C627_SOLLC	K4C627	UniRef90_O04974	Cluster: 2-isopropylmalate synthase B	UniProtKB Reviewed (Swiss-Prot); UniProtKB Unreviewed (TrEMBL); UniParc	13	Solanum pennellii (Tomato); Solanum lycopersicum (Tomato); Solanum chilense (Tomato); Solanum tuberosum (Potato); Nicotiana attenuata (Coyote tobacco); Capsicum chinense (Scotch bonnet); Capsicum annuum (Capsicum pepper); Capsicum baccatum (Peruvian pepper); Solanum stenotomum; Solanum verrucosum		2-isopropylmalate synthase B	66539	749.148	2	48	3.7582	11.619	92	39.4024	true	[BLASTED, MAPPED, ANNOTATED]	tr|K4C627|K4C627_SOLLC	2-isopropylmalate synthase OS=Solanum lycopersicum OX=4081 GN=101245066 PE=2 SV=1	612	20	0	94.46	4	P:GO:0009082; P:GO:0009098; F:GO:0003852; C:GO:0009507	P:branched-chain amino acid biosynthetic process; P:leucine biosynthetic process; F:2-isopropylmalate synthase activity; C:chloroplast	EC:2.3.3.13	2-isopropylmalate synthase

## Sheet: B) F1
N	Entry	Accession	Cluster ID in UniRef	Cluster Name	Types	Size	Organisms		Description Blast OmicsBox	Mw (Da)	PLGS Score	Peptides	Theoretical Peptides	Coverage (%)	Precursor RMS Mass Error (ppm)	Products	Products RMS Mass Error (ppm)		Tags	SeqName	Description UniProt	Length	#Hits	e-Value	sim mean	#GO	GO IDs	GO Names	Enzyme Codes	Enzyme Names
	no ID

## Sheet: C) F2
N	Entry	Accession	Cluster ID in UniRef	Cluster Name	Types	Size	Organisms		Description Blast OmicsBox	Mw (Da)	PLGS Score	Peptides	Theoretical Peptides	Coverage (%)	Precursor RMS Mass Error (ppm)	Products	Products RMS Mass Error (ppm)		Tags	SeqName	Description UniProt	Length	#Hits	e-Value	sim mean	#GO	GO IDs	GO Names	Enzyme Codes	Enzyme Names
1	LOXB_SOLLC	UniRef90_P38416	Cluster: Linoleate 9S-lipoxygenase B	UniProtKB Reviewed (Swiss-Prot); UniProtKB Unreviewed (TrEMBL)	4	Solanum lycopersicum (Tomato); Solanum chilense (Tomato)	859	0.9	putative linoleate 9S-lipoxygenase 5	97061	11986.5	37	87	51.5716	0.7379	537	17.5396	true	[BLASTED, MAPPED, ANNOTATED]	sp|P38416|LOXB_SOLLC	Linoleate 9S-lipoxygenase B OS=Solanum lycopersicum OX=4081 GN=LOX1.2 PE=2 SV=1	859	20	0	90.27	6	P:GO:0006633; P:GO:0031408; P:GO:0034440; F:GO:0046872; F:GO:1990136; C:GO:0005737	P:fatty acid biosynthetic process; P:oxylipin biosynthetic process; P:lipid oxidation; F:metal ion binding; F:linoleate 9S-lipoxygenase activity; C:cytoplasm	EC:1.13.11.58	Linoleate 9S-lipoxygenase
2	Q84XW6_SOLLC	UniRef90_M1CTC4	Cluster: V-type proton ATPase catalytic subunit A	UniProtKB Unreviewed (TrEMBL); UniParc	28	Solanum tuberosum (Potato); Malus baccata (Siberian crab apple); Rhaphiolepis bibas; Cicer arietinum (Chickpea); Medicago truncatula (Barrel medic); Trifolium pratense (Red clover); Trifolium medium; Cucurbita maxima (Pumpkin); Cucumis sativus (Cucumber); Cucumis melo var. makuwa; Cucumis melo (Muskmelon); Prunus avium (Cherry); Cucurbita moschata (Winter crookneck squash); Solanum lycopersicum (…	623	0.9	V-type proton ATPase catalytic subunit A	68526	48777.4	36	64	65.6501	2.0911	567	15.8284	true	[BLASTED, MAPPED, ANNOTATED]	tr|Q84XW6|Q84XW6_SOLLC	V-ATPase 69 kDa subunit OS=Solanum lycopersicum OX=4081 PE=2 SV=1	623	20	0	98.78	7	P:GO:0015986; F:GO:0005524; F:GO:0046933; F:GO:0046961; C:GO:0000325; C:GO:0009507; C:GO:0033180	P:ATP synthesis coupled proton transport; F:ATP binding; F:proton-transporting ATP synthase activity, rotational mechanism; F:proton-transporting ATPase activity, rotational mechanism; C:plant-type vacuole; C:chloroplast; C:proton-transporting V-type ATPase, V1 domain	EC:7.1.3.1; EC:7.1.2.2; EC:6	H(+)-exporting diphosphatase; H(+)-transporting two-sector ATPase; Ligases
3	Q84XV7_SOLLC	UniRef90_O23654	Cluster: V-type proton ATPase catalytic subunit A	UniProtKB Reviewed (Swiss-Prot); UniProtKB Unreviewed (TrEMBL); UniParc	216	Arabidopsis thaliana (Mouse-ear cress); Vigna radiata var. radiata (Mung bean); Citrus unshiu (Satsuma mandarin); Arabidopsis suecica (Swedish thale-cress); Arabidopsis thaliana x Arabidopsis arenosa; Noccaea caerulescens (Alpine penny-cress); Anthurium amnicola; Nymphaea colorata; Eragrostis curvula (weeping love grass); Aquilegia coerulea (Rocky mountain columbine); Dichanthelium oligosanthes; …	623	0.9	V-type proton ATPase catalytic subunit A	68671	32874.8	32	66	55.2167	14.4362	428	16.4823	true	[BLASTED, MAPPED, ANNOTATED]	tr|Q84XV7|Q84XV7_SOLLC	V-ATPase 69 kDa subunit OS=Solanum lycopersicum OX=4081 PE=2 SV=1	623	20	0	98.77	7	P:GO:0015986; F:GO:0005524; F:GO:0046933; F:GO:0046961; C:GO:0000325; C:GO:0009507; C:GO:0033180	P:ATP synthesis coupled proton transport; F:ATP binding; F:proton-transporting ATP synthase activity, rotational mechanism; F:proton-transporting ATPase activity, rotational mechanism; C:plant-type vacuole; C:chloroplast; C:proton-transporting V-type ATPase, V1 domain	EC:7.1.3.1; EC:7.1.2.2; EC:6	H(+)-exporting diphosphatase; H(+)-transporting two-sector ATPase; Ligases
4	A0A3Q7FE06_SOLLC	UniRef90_A0A3Q7FE06	Cluster: V-type proton ATPase subunit a	UniProtKB Unreviewed (TrEMBL); UniParc	16	Solanum lycopersicum (Tomato); Solanum chacoense (Chaco potato); Capsicum baccatum (Peruvian pepper); Solanum chilense (Tomato); Capsicum chinense (Scotch bonnet); Capsicum annuum (Capsicum pepper); Nicotiana tabacum (Common tobacco); Nicotiana attenuata (Coyote tobacco); Nicotiana sylvestris (Wood tobacco); Solanum verrucosum; Solanum tuberosum; Solanum stenotomum; Solanum pennellii; Nicotiana t…	820	0.9	V-type proton ATPase subunit a3	92689	10433	31	62	38.5366	1.3809	366	19.0005	true	[BLASTED, MAPPED, ANNOTATED]	tr|A0A3Q7FE06|A0A3Q7FE06_SOLLC	V-type proton ATPase subunit a OS=Solanum lycopersicum OX=4081 GN=101265176 PE=3 SV=1	820	20	0	95.27	15	P:GO:0006270; P:GO:0007035; P:GO:0032508; P:GO:1902600; F:GO:0003677; F:GO:0003678; F:GO:0005524; F:GO:0015078; F:GO:0016787; F:GO:0051117; C:GO:0000220; C:GO:0005634; C:GO:0016021; C:GO:0016471; C:GO:0042555	P:DNA replication initiation; P:vacuolar acidification; P:DNA duplex unwinding; P:proton transmembrane transport; F:DNA binding; F:DNA helicase activity; F:ATP binding; F:proton transmembrane transporter activity; F:hydrolase activity; F:ATPase binding; C:vacuolar proton-transporting V-type ATPase, V0 domain; C:nucleus; C:integral component of membrane; C:vacuolar proton-transporting V-type ATPas…	EC:3.6.4.12; EC:7	DNA helicase; Translocases
5	A0A3Q7IIS5_SOLLC	UniRef90_A0A3Q7IIS5	Cluster: Vacuolar proton pump subunit B	UniProtKB Unreviewed (TrEMBL)	5	Solanum lycopersicum (Tomato); Solanum tuberosum (Potato); Solanum chacoense (Chaco potato); Solanum chilense (Tomato)	489	0.9	V-type proton ATPase subunit B2	54474	42280.6	24	45	58.4867	18.4382	404	20.7085	true	[BLASTED, MAPPED, ANNOTATED]	tr|A0A3Q7IIS5|A0A3Q7IIS5_SOLLC	Vacuolar proton pump subunit B OS=Solanum lycopersicum OX=4081 PE=3 SV=1	489	20	0	98.52	8	P:GO:0006468; P:GO:0046034; P:GO:1902600; F:GO:0004674; F:GO:0005524; C:GO:0005886; C:GO:0009536; C:GO:0033180	P:protein phosphorylation; P:ATP metabolic process; P:proton transmembrane transport; F:protein serine/threonine kinase activity; F:ATP binding; C:plasma membrane; C:plastid; C:proton-transporting V-type ATPase, V1 domain	EC:2.7.1	Transferring phosphorus-containing groups
6	A0A3Q7FGG9_SOLLC	UniRef90_P36182	Cluster: Heat shock protein 82 (Fragment)	UniProtKB Reviewed (Swiss-Prot); UniProtKB Unreviewed (TrEMBL); UniParc	44	Nicotiana tabacum (Common tobacco); Nicotiana sylvestris (Wood tobacco); Populus tomentosa (Chinese white poplar); Salix viminalis (Common osier); Tripterygium wilfordii (Thunder God vine); Capsicum annuum (Capsicum pepper); Solanum tuberosum (Potato); Solanum chacoense (Chaco potato); Castanea mollissima (Chinese chestnut); Solanum chilense (Tomato); Cucurbita maxima (Pumpkin); Cucurbita moschat…	499	0.9	heat shock protein 82	80765	3179.09	22	82	31.5341	10.3619	176	21.9957	true	[BLASTED, MAPPED, ANNOTATED]	tr|A0A3Q7FGG9|A0A3Q7FGG9_SOLLC	HATPase_c domain-containing protein OS=Solanum lycopersicum OX=4081 PE=3 SV=1	704	20	0	99.27	9	P:GO:0006457; P:GO:0034605; P:GO:0050821; F:GO:0005524; F:GO:0051082; C:GO:0005829; C:GO:0005886; C:GO:0032991; C:GO:0048471	P:protein folding; P:cellular response to heat; P:protein stabilization; F:ATP binding; F:unfolded protein binding; C:cytosol; C:plasma membrane; C:protein-containing complex; C:perinuclear region of cytoplasm
7	A0A3Q7HLX5_SOLLC	UniRef90_P51819	Cluster: Heat shock protein 83	UniProtKB Reviewed (Swiss-Prot); UniProtKB Unreviewed (TrEMBL); UniParc	92	Ipomoea nil (Japanese morning glory); Malus domestica (Apple); Morella rubra; Momordica charantia (Bitter gourd); Tripterygium wilfordii (Thunder God vine); Punica granatum (Pomegranate); Rhododendron simsii (Sims's rhododendron); Nyssa sinensis; Lactuca sativa (Garden lettuce); Fagopyrum esculentum (Common buckwheat); Actinidia chinensis var. chinensis (Chinese soft-hair kiwi); Solanum chilense …	703	0.9	heat shock protein 83	80957	3215.57	21	81	29.1193	2.9266	169	18.5497	true	[BLASTED, MAPPED, ANNOTATED]	tr|A0A3Q7HLX5|A0A3Q7HLX5_SOLLC	HATPase_c domain-containing protein OS=Solanum lycopersicum OX=4081 PE=3 SV=1	704	20	0	97.96	9	P:GO:0006457; P:GO:0034605; P:GO:0050821; F:GO:0005524; F:GO:0051082; C:GO:0005829; C:GO:0005886; C:GO:0032991; C:GO:0048471	P:protein folding; P:cellular response to heat; P:protein stabilization; F:ATP binding; F:unfolded protein binding; C:cytosol; C:plasma membrane; C:protein-containing complex; C:perinuclear region of cytoplasm
8	A0A3Q7FX57_SOLLC	UniRef90_I1HT87	Cluster: Heat shock cognate 70 kDa protein	UniProtKB Unreviewed (TrEMBL); UniParc	46	Brachypodium distachyon (Purple false brome); Solanum lycopersicum (Tomato); Rhododendron simsii (Sims's rhododendron); Oryza brachyantha (malo sina); Theobroma cacao (Cacao); Robinia pseudoacacia (Black locust); Triticum aestivum (Wheat); Solanum chilense (Tomato); Spinacia oleracea (Spinach); Tetracentron sinense; Olea europaea subsp. europaea; Vitis vinifera (Grape); Solanum tuberosum (Potato)…	654	0.9	heat shock cognate 70 kDa protein 2-like	85456	36180.9	20	62	37.1029	11.287	263	22.4119	true	[BLASTED, MAPPED, ANNOTATED]	tr|A0A3Q7FX57|A0A3Q7FX57_SOLLC	Uncharacterized protein OS=Solanum lycopersicum OX=4081 PE=3 SV=1	787	20	0	98.49	9	P:GO:0034620; P:GO:0042026; P:GO:0051085; F:GO:0005524; F:GO:0031072; F:GO:0044183; F:GO:0051082; F:GO:0051787; C:GO:0005788	P:cellular response to unfolded protein; P:protein refolding; P:chaperone cofactor-dependent protein refolding; F:ATP binding; F:heat shock protein binding; F:protein folding chaperone; F:unfolded protein binding; F:misfolded protein binding; C:endoplasmic reticulum lumen
9	A0A3Q7IYI9_SOLLC	UniRef90_A0A1S4CVP2	Cluster: heat shock cognate 70 kDa protein-like	UniProtKB Unreviewed (TrEMBL); UniParc	35	Nicotiana tabacum (Common tobacco); Panicum virgatum (Blackwell switchgrass); Solanum lycopersicum (Tomato); Solanum chilense (Tomato); Solanum tuberosum (Potato); Vitis vinifera (Grape); Capsicum annuum (Capsicum pepper); Nicotiana sylvestris (Wood tobacco); Nicotiana attenuata (Coyote tobacco); Capsicum baccatum (Peruvian pepper); Solanum chacoense (Chaco potato); Capsicum chinense (Scotch bonn…	651	0.9	heat shock cognate 70 kDa protein	71414	35017.5	20	56	47.0948	13.2632	267	27.0608	true	[BLASTED, MAPPED, ANNOTATED]	tr|A0A3Q7IYI9|A0A3Q7IYI9_SOLLC	Uncharacterized protein OS=Solanum lycopersicum OX=4081 GN=101255164 PE=3 SV=1	654	20	0	98.57	9	P:GO:0034620; P:GO:0042026; P:GO:0051085; F:GO:0005524; F:GO:0031072; F:GO:0044183; F:GO:0051082; F:GO:0051787; C:GO:0005788	P:cellular response to unfolded protein; P:protein refolding; P:chaperone cofactor-dependent protein refolding; F:ATP binding; F:heat shock protein binding; F:protein folding chaperone; F:unfolded protein binding; F:misfolded protein binding; C:endoplasmic reticulum lumen
10	A0A3Q7I0J3_SOLLC	UniRef90_M1BTA3	Cluster: Protein SSUH2 homolog	UniProtKB Unreviewed (TrEMBL); UniParc	27	Solanum tuberosum (Potato); Nicotiana tabacum (Common tobacco); Nicotiana sylvestris (Wood tobacco); Solanum chilense (Tomato); Nicotiana attenuata (Coyote tobacco); Capsicum baccatum (Peruvian pepper); Capsicum annuum (Capsicum pepper); Capsicum chinense (Scotch bonnet); Solanum lycopersicum (Tomato); Solanum verrucosum; Solanum stenotomum; Solanum pennellii; Nicotiana tomentosiformis	433	0.9	protein SSUH2 homolog isoform X1	47816	3511.66	20	45	50.8121	9.8227	165	22.3343	true	[BLASTED]	tr|A0A3Q7I0J3|A0A3Q7I0J3_SOLLC	Uncharacterized protein OS=Solanum lycopersicum OX=4081 GN=101259068 PE=4 SV=1	431	20	0	95.93
11	A0A3Q7FN07_SOLLC	UniRef90_A0A2G3A7D2	Cluster: V-type proton ATPase subunit C	UniProtKB Unreviewed (TrEMBL); UniParc	21	Capsicum annuum (Capsicum pepper); Capsicum baccatum (Peruvian pepper); Capsicum chinense (Scotch bonnet); Solanum lycopersicum (Tomato); Nicotiana tabacum (Common tobacco); Nicotiana sylvestris (Wood tobacco); Solanum chacoense (Chaco potato); Solanum chilense (Tomato); Nicotiana attenuata (Coyote tobacco); Solanum verrucosum; Solanum tuberosum; Nicotiana tomentosiformis; Solanum stenotomum	377	0.9	V-type proton ATPase subunit C	42785	8980.57	19	33	60.9043	0.8157	230	19.4401	true	[BLASTED, MAPPED, ANNOTATED]	tr|A0A3Q7FN07|A0A3Q7FN07_SOLLC	V-type proton ATPase subunit C OS=Solanum lycopersicum OX=4081 PE=3 SV=1	376	20	0	97.58	3	P:GO:1902600; F:GO:0046961; C:GO:0000221	P:proton transmembrane transport; F:proton-transporting ATPase activity, rotational mechanism; C:vacuolar proton-transporting V-type ATPase, V1 domain	EC:7.1.3.1	H(+)-exporting diphosphatase
12	A0A3Q7H3K1_SOLLC	UniRef90_A0A3Q7H3K1	Cluster: MI domain-containing protein	UniProtKB Unreviewed (TrEMBL)	1	Solanum lycopersicum (Tomato)	1407	0.9	eukaryotic translation initiation factor isoform 4g-1	154625	31143.2	18	122	17.3419	22.8275	148	30.2444	true	[BLASTED, MAPPED, ANNOTATED]	tr|A0A3Q7H3K1|A0A3Q7H3K1_SOLLC	MI domain-containing protein OS=Solanum lycopersicum OX=4081 PE=4 SV=1	1407	20	0	95.09	5	P:GO:0006413; P:GO:0006417; F:GO:0003729; F:GO:0003743; C:GO:0016281	P:translational initiation; P:regulation of translation; F:mRNA binding; F:translation initiation factor activity; C:eukaryotic translation initiation factor 4F complex
13	A0A3Q7FQU3_SOLLC	UniRef90_A0A3Q7FQU3	Cluster: Clp R domain-containing protein	UniProtKB Unreviewed (TrEMBL); UniParc	26	Solanum lycopersicum (Tomato); Solanum tuberosum (Potato); Solanum phureja; Nicotiana tabacum (Common tobacco); Nicotiana sylvestris (Wood tobacco); Capsicum annuum (Capsicum pepper); Nicotiana attenuata (Coyote tobacco); Capsicum chinense (Scotch bonnet); Solanum chilense (Tomato); Capsicum baccatum (Peruvian pepper); Solanum chacoense (Chaco potato); Solanum verrucosum; Solanum stenotomum; Sola…	911	0.9	chaperone protein ClpB1	101054	1345.61	18	81	26.7838	25.5411	164	31.6271	true	[BLASTED, MAPPED, ANNOTATED]	tr|A0A3Q7FQU3|A0A3Q7FQU3_SOLLC	Clp R domain-containing protein OS=Solanum lycopersicum OX=4081 GN=101254583 PE=3 SV=1	911	20	0	97.69	3	P:GO:0034605; F:GO:0005524; C:GO:0005737	P:cellular response to heat; F:ATP binding; C:cytoplasm
14	A0A3Q7IZ03_SOLLC	UniRef90_P22953	Cluster: Heat shock 70 kDa protein 1	UniProtKB Reviewed (Swiss-Prot); UniProtKB Unreviewed (TrEMBL); UniParc	99	Arabidopsis thaliana (Mouse-ear cress); Arabidopsis suecica (Swedish thale-cress); Arabidopsis thaliana x Arabidopsis arenosa; Triticum urartu (Red wild einkorn); Aegilops tauschii subsp. strangulata (Goatgrass); Vitis vinifera (Grape); Ziziphus jujuba (Chinese jujube); Chimonanthus praecox; Capsella rubella; Noccaea caerulescens (Alpine penny-cress); Eutrema salsugineum (Saltwater cress); Arabis…	651	0.9	heat shock cognate 70 kDa protein 2-like	71099	34251.5	17	54	38.6749	16.949	210	23.5253	true	[BLASTED, MAPPED, ANNOTATED]	tr|A0A3Q7IZ03|A0A3Q7IZ03_SOLLC	Uncharacterized protein OS=Solanum lycopersicum OX=4081 PE=3 SV=1	649	20	0	98.51	9	P:GO:0034620; P:GO:0042026; P:GO:0051085; F:GO:0005524; F:GO:0031072; F:GO:0044183; F:GO:0051082; F:GO:0051787; C:GO:0005788	P:cellular response to unfolded protein; P:protein refolding; P:chaperone cofactor-dependent protein refolding; F:ATP binding; F:heat shock protein binding; F:protein folding chaperone; F:unfolded protein binding; F:misfolded protein binding; C:endoplasmic reticulum lumen
15	A0A3Q7HZV3_SOLLC	UniRef90_I7GVS5	Cluster: Heat shock protein 70	UniProtKB Unreviewed (TrEMBL); UniParc	118	Nicotiana tabacum (Common tobacco); Nicotiana sylvestris (Wood tobacco); Nicotiana benthamiana; Eucalyptus grandis (Flooded gum); Aquilegia coerulea (Rocky mountain columbine); Triticum aestivum (Wheat); Spirodela intermedia (Intermediate duckweed); Olea europaea subsp. europaea; Aegilops tauschii (Tausch's goatgrass); Aegilops tauschii subsp. strangulata (Goatgrass); Triticum urartu (Red wild ei…	649	0.9	heat shock cognate 70 kDa protein 2-like	71180	34208.1	17	54	36.3636	18.1795	216	24.2034	true	[BLASTED, MAPPED, ANNOTATED]	tr|A0A3Q7HZV3|A0A3Q7HZV3_SOLLC	Uncharacterized protein OS=Solanum lycopersicum OX=4081 GN=101247151 PE=3 SV=1	649	20	0	98.87	9	P:GO:0034620; P:GO:0042026; P:GO:0051085; F:GO:0005524; F:GO:0031072; F:GO:0044183; F:GO:0051082; F:GO:0051787; C:GO:0005788	P:cellular response to unfolded protein; P:protein refolding; P:chaperone cofactor-dependent protein refolding; F:ATP binding; F:heat shock protein binding; F:protein folding chaperone; F:unfolded protein binding; F:misfolded protein binding; C:endoplasmic reticulum lumen
16	A0A3Q7J492_SOLLC	UniRef90_A0A3Q7J492	Cluster: FAD_binding_3 domain-containing protein	UniProtKB Unreviewed (TrEMBL); UniParc	22	Solanum lycopersicum (Tomato); Solanum chilense (Tomato); Solanum chacoense (Chaco potato); Solanum tuberosum (Potato); Solanum verrucosum; Solanum pennellii; Solanum stenotomum	407	0.9	FAD-dependent urate hydroxylase-like isoform X1	44546	12460	16	29	54.2998	0.7983	174	18.0797	true	[BLASTED, MAPPED, ANNOTATED]	tr|A0A3Q7J492|A0A3Q7J492_SOLLC	FAD_binding_3 domain-containing protein OS=Solanum lycopersicum OX=4081 GN=101247497 PE=4 SV=1	407	20	0	91.16	3	F:GO:0004497; F:GO:0071949; C:GO:0016021	F:monooxygenase activity; F:FAD binding; C:integral component of membrane	EC:1	Oxidoreductases
17	A0A3Q7GTE7_SOLLC	UniRef90_A0A1U8H482	Cluster: alcohol dehydrogenase 1	UniProtKB Unreviewed (TrEMBL)	12	Capsicum annuum (Capsicum pepper); Solanum lycopersicum (Tomato); Solanum pimpinellifolium (Currant tomato); Solanum lycopersicum var. cerasiforme; Solanum pennellii (Tomato); Solanum peruvianum (Peruvian tomato); Solanum cheesmaniae (Galapagos Island tomato); Capsicum chinense (Scotch bonnet); Nicotiana attenuata (Coyote tobacco); Nicotiana tabacum (Common tobacco)	380	0.9	alcohol dehydrogenase 1	41275	11510.8	16	30	54.9738	0.9282	169	20.6682	true	[BLASTED, MAPPED, ANNOTATED]	tr|A0A3Q7GTE7|A0A3Q7GTE7_SOLLC	Uncharacterized protein OS=Solanum lycopersicum OX=4081 PE=3 SV=1	382	20	0	97.13	6	P:GO:0046294; F:GO:0003979; F:GO:0004024; F:GO:0008270; F:GO:0051903; C:GO:0005829	P:formaldehyde catabolic process; F:UDP-glucose 6-dehydrogenase activity; F:alcohol dehydrogenase activity, zinc-dependent; F:zinc ion binding; F:S-(hydroxymethyl)glutathione dehydrogenase activity; C:cytosol	EC:1.1.1.22; EC:1.1.1.284; EC:1.1.1.1; EC:1.1.1.71	UDP-glucose 6-dehydrogenase; S-(hydroxymethyl)glutathione dehydrogenase; Alcohol dehydrogenase; Alcohol dehydrogenase (NAD(P)(+))
18	A0A3Q7FV11_SOLLC	UniRef90_A0A3Q7FV11	Cluster: H(+)-exporting diphosphatase	UniProtKB Unreviewed (TrEMBL); UniParc	2	Solanum lycopersicum (Tomato)	1109	0.9	pyrophosphate-energized vacuolar membrane proton pump-like	119623	3195.42	16	73	15.78	8.1898	137	29.9784	true	[BLASTED, MAPPED, ANNOTATED]	tr|A0A3Q7FV11|A0A3Q7FV11_SOLLC	H(+)-exporting diphosphatase OS=Solanum lycopersicum OX=4081 PE=3 SV=1	1109	20	0	98.12	4	P:GO:1902600; F:GO:0004427; F:GO:0009678; C:GO:0016021	P:proton transmembrane transport; F:inorganic diphosphatase activity; F:pyrophosphate hydrolysis-driven proton transmembrane transporter activity; C:integral component of membrane	EC:7.1.3.1; EC:3.6.1.1	H(+)-exporting diphosphatase; Inorganic diphosphatase
19	Q53Z32_SOLLC	UniRef90_P55737	Cluster: Heat shock protein 90-2	UniProtKB Reviewed (Swiss-Prot); UniProtKB Unreviewed (TrEMBL); UniParc	676	Arabidopsis thaliana (Mouse-ear cress); Oryza sativa subsp. indica (Rice); Oryza sativa subsp. japonica (Rice); Solanum lycopersicum (Tomato); Gossypium arboreum (Tree cotton); Ageratina adenophora; Morus notabilis; Salix dunnii; Brassica oleracea (Wild cabbage); Brassica cretica (Mustard); Noccaea caerulescens (Alpine penny-cress); Lupinus albus (White lupine); Anthurium amnicola; Castanea molli…	699	0.9	heat shock cognate protein 80	80085	2797.89	16	80	24.3205	0.7596	148	23.7832	true	[BLASTED, MAPPED, ANNOTATED]	tr|Q53Z32|Q53Z32_SOLLC	Molecular chaperone Hsp90-2 OS=Solanum lycopersicum OX=4081 PE=2 SV=1	699	20	0	98.98	9	P:GO:0006457; P:GO:0034605; P:GO:0050821; F:GO:0005524; F:GO:0051082; C:GO:0005829; C:GO:0005886; C:GO:0032991; C:GO:0048471	P:protein folding; P:cellular response to heat; P:protein stabilization; F:ATP binding; F:unfolded protein binding; C:cytosol; C:plasma membrane; C:protein-containing complex; C:perinuclear region of cytoplasm
20	A0A3Q7FKE1_SOLLC	UniRef90_Q9FSY7	Cluster: Endoplasmic reticulum chaperone BiP	UniProtKB Reviewed (Swiss-Prot); UniProtKB Unreviewed (TrEMBL); UniParc	264	Corylus avellana (European hazel); Nicotiana tabacum (Common tobacco); Salix brachista; Salix viminalis (Common osier); Gossypium barbadense (Sea-island cotton); Gossypium australe; Gossypium armourianum; Gossypium schwendimanii (Cotton); Eutrema salsugineum (Saltwater cress); Eutrema halophilum (Salt cress); Cuscuta campestris; Raphanus sativus (Radish); Brassica oleracea var. oleracea; Brassica…	668	0.9	luminal-binding protein 5	73444	30119.3	15	73	33.0838	1.3596	109	32.8646	true	[BLASTED, MAPPED, ANNOTATED]	tr|A0A3Q7FKE1|A0A3Q7FKE1_SOLLC	Uncharacterized protein OS=Solanum lycopersicum OX=4081 PE=3 SV=1	668	20	0	97.88	13	P:GO:0030433; P:GO:0030968; P:GO:0042026; P:GO:0051085; F:GO:0005524; F:GO:0031072; F:GO:0044183; F:GO:0051082; F:GO:0051787; C:GO:0005634; C:GO:0005788; C:GO:0016021; C:GO:0034663	P:ubiquitin-dependent ERAD pathway; P:endoplasmic reticulum unfolded protein response; P:protein refolding; P:chaperone cofactor-dependent protein refolding; F:ATP binding; F:heat shock protein binding; F:protein folding chaperone; F:unfolded protein binding; F:misfolded protein binding; C:nucleus; C:endoplasmic reticulum lumen; C:integral component of membrane; C:endoplasmic reticulum chaperone …
21	A0A3Q7F0I2_SOLLC	UniRef90_A0A3Q7F0I2	Cluster: V-type proton ATPase subunit D	UniProtKB Unreviewed (TrEMBL); UniParc	36	Solanum lycopersicum (Tomato); Solanum chilense (Tomato); Solanum tuberosum (Potato); Solanum chacoense (Chaco potato); Solanum cheesmaniae (Galapagos Island tomato); Solanum lycopersicoides; Solanum chmielewskii; Solanum peruvianum (Peruvian tomato); Solanum pimpinellifolium (Currant tomato); Solanum arcanum; Solanum quitoense; Solanum hirtum; Nicotiana attenuata (Coyote tobacco); Capsicum bacca…	261	0.9	V-type proton ATPase subunit D	29041	7251.12	15	29	49.8084	0.8927	122	20.1595	true	[BLASTED, MAPPED, ANNOTATED]	tr|A0A3Q7F0I2|A0A3Q7F0I2_SOLLC	Uncharacterized protein OS=Solanum lycopersicum OX=4081 PE=3 SV=1	261	20	0	96.95	4	P:GO:1902600; F:GO:0046961; C:GO:0005774; C:GO:0033176	P:proton transmembrane transport; F:proton-transporting ATPase activity, rotational mechanism; C:vacuolar membrane; C:proton-transporting V-type ATPase complex	EC:7.1.3.1	H(+)-exporting diphosphatase
22	B0JEU3_SOLLC	UniRef90_A0A6N2BP58	Cluster: Vicilin GC72-A	UniProtKB Unreviewed (TrEMBL); UniParc	7	Solanum chilense (Tomato); Solanum lycopersicum (Tomato); Solanum tuberosum (Potato); Solanum pennellii; Solanum verrucosum; Solanum stenotomum	569	0.9	vicilin-like antimicrobial peptides 2-3	66137	4573.64	15	62	39.7188	3.7286	130	22.94	true	[BLASTED]	tr|B0JEU3|B0JEU3_SOLLC	Vicilin OS=Solanum lycopersicum OX=4081 GN=vicilin PE=1 SV=1	569	20	0	87.09
23	A0A3Q7I6C6_SOLLC	UniRef90_A0A3Q7I6C6	Cluster: Cytochrome P450	UniProtKB Unreviewed (TrEMBL); UniParc	7	Solanum lycopersicum (Tomato); Solanum tuberosum (Potato); Solanum chilense (Tomato); Solanum pennellii; Solanum stenotomum; Solanum verrucosum	502	0.9	cytochrome P450 94A2-like	58111	2037.22	15	50	36.0558	3.3244	112	26.5799	true	[BLASTED, MAPPED, ANNOTATED]	tr|A0A3Q7I6C6|A0A3Q7I6C6_SOLLC	Uncharacterized protein OS=Solanum lycopersicum OX=4081 GN=101249297 PE=3 SV=1	502	20	0	92.56	5	F:GO:0004497; F:GO:0005506; F:GO:0016705; F:GO:0020037; C:GO:0016021	F:monooxygenase activity; F:iron ion binding; F:oxidoreductase activity, acting on paired donors, with incorporation or reduction of molecular oxygen; F:heme binding; C:integral component of membrane	EC:1.14	Acting on paired donors, with incorporation or reduction of molecular oxygen. The oxygen incorporated need not be derived from O(2)
24	A0A3Q7IM60_SOLLC	UniRef90_A2Q5T7	Cluster: V-type proton ATPase subunit	UniProtKB Unreviewed (TrEMBL); UniParc	143	Medicago truncatula (Barrel medic); Striga asiatica (Asiatic witchweed); Actinidia rufa; Artemisia annua (Sweet wormwood); Nicotiana sylvestris (Wood tobacco); Cocos nucifera (Coconut palm); Mikania micrantha; Handroanthus impetiginosus; Apostasia shenzhenica; Capsella rubella; Arabis nemorensis; Gossypium hirsutum (Upland cotton); Gossypium mustelinum (Cotton); Salix dunnii; Vanilla planifolia (…	351	0.9	V-type proton ATPase subunit d2	40727	7919.31	14	25	46.7236	5.2308	188	19.7664	true	[BLASTED, MAPPED, ANNOTATED]	tr|A0A3Q7IM60|A0A3Q7IM60_SOLLC	V-type proton ATPase subunit OS=Solanum lycopersicum OX=4081 GN=101264386 PE=3 SV=1	351	20	0	99.33	6	P:GO:0007034; P:GO:0007035; P:GO:1902600; F:GO:0015078; C:GO:0016471; C:GO:0033179	P:vacuolar transport; P:vacuolar acidification; P:proton transmembrane transport; F:proton transmembrane transporter activity; C:vacuolar proton-transporting V-type ATPase complex; C:proton-transporting V-type ATPase, V0 domain	EC:7	Translocases
25	A0A3Q7I6G7_SOLLC	UniRef90_A0A3Q7I6G7	Cluster: Cupin type-1 domain-containing protein	UniProtKB Unreviewed (TrEMBL)	1	Solanum lycopersicum (Tomato)	861	0.9	vicilin GC72-A-like	98813	4259.39	14	81	23.4611	11.5481	107	23.9023	true	[BLASTED]	tr|A0A3Q7I6G7|A0A3Q7I6G7_SOLLC	Uncharacterized protein OS=Solanum lycopersicum OX=4081 PE=4 SV=1	861	20	0	82.13
26	A0A3Q7I9U4_SOLLC	UniRef90_P32112	Cluster: Adenosylhomocysteinase	UniProtKB Reviewed (Swiss-Prot); UniProtKB Unreviewed (TrEMBL); UniParc	306	Triticum aestivum (Wheat); Mesembryanthemum crystallinum (Common ice plant); Nicotiana sylvestris (Wood tobacco); Nicotiana tabacum (Common tobacco); Catharanthus roseus (Madagascar periwinkle); Arabidopsis thaliana (Mouse-ear cress); Solanum lycopersicum (Tomato); Erythranthe guttata (Yellow monkey flower); Chenopodium quinoa (Quinoa); Aquilegia coerulea (Rocky mountain columbine); Spinacia oler…	485	0.9	adenosylhomocysteinase	53116	3467.51	14	37	37.9381	1.5135	122	19.0197	true	[BLASTED, MAPPED, ANNOTATED]	tr|A0A3Q7I9U4|A0A3Q7I9U4_SOLLC	Adenosylhomocysteinase OS=Solanum lycopersicum OX=4081 GN=544304 PE=3 SV=1	485	20	0	99.03	4	P:GO:0006730; P:GO:0033353; F:GO:0004013; C:GO:0005829	P:one-carbon metabolic process; P:S-adenosylmethionine cycle; F:adenosylhomocysteinase activity; C:cytosol	EC:3.3.1.1	Adenosylhomocysteinase
27	A0A3Q7FS03_SOLLC	UniRef90_A0A3Q7FS03	Cluster: Heat shock protein 70 family	UniProtKB Unreviewed (TrEMBL); UniParc	20	Solanum lycopersicum (Tomato); Olea europaea subsp. europaea; Rhodamnia argentea; Solanum chilense (Tomato); Capsicum annuum (Capsicum pepper); Capsicum baccatum (Peruvian pepper); Ziziphus jujuba (Chinese jujube); Capsicum chinense (Scotch bonnet); Punica granatum (Pomegranate); Herrania umbratica; Corchorus capsularis (Jute); Pistacia vera; Solanum pennellii; Solanum stenotomum; Ziziphus jujuba…	654	0.9	heat shock 70 kDa protein	71804	31245.3	13	55	30.2752	9.0899	128	25.0381	true	[BLASTED, MAPPED, ANNOTATED]	tr|A0A3Q7FS03|A0A3Q7FS03_SOLLC	Uncharacterized protein OS=Solanum lycopersicum OX=4081 GN=101255185 PE=3 SV=1	654	20	0	97.39	10	P:GO:0034620; P:GO:0042026; P:GO:0051085; F:GO:0005524; F:GO:0031072; F:GO:0032440; F:GO:0044183; F:GO:0051082; F:GO:0051787; C:GO:0005788	P:cellular response to unfolded protein; P:protein refolding; P:chaperone cofactor-dependent protein refolding; F:ATP binding; F:heat shock protein binding; F:2-alkenal reductase [NAD(P)+] activity; F:protein folding chaperone; F:unfolded protein binding; F:misfolded protein binding; C:endoplasmic reticulum lumen	EC:1.3.1.74	2-alkenal reductase (NAD(P)(+))
28	BIP_SOLLC	UniRef90_P49118	Cluster: Luminal-binding protein	UniProtKB Reviewed (Swiss-Prot); UniProtKB Unreviewed (TrEMBL); UniParc	28	Solanum lycopersicum (Tomato); Nicotiana attenuata (Coyote tobacco); Medicago truncatula (Barrel medic); Trifolium medium; Solanum tuberosum (Potato); Solanum chilense (Tomato); Cicer arietinum (Chickpea); Musa balbisiana (Banana); Musa acuminata subsp. malaccensis (Wild banana); Miscanthus lutarioriparius; Glycine max (Soybean); Impatiens glandulifera; Pisum sativum; Solanum verrucosum; Solanum …	666	0.9	luminal-binding protein	73189	30029.2	13	72	27.6276	1.9426	97	31.2561	true	[BLASTED, MAPPED, ANNOTATED]	sp|P49118|BIP_SOLLC	Luminal-binding protein OS=Solanum lycopersicum OX=4081 PE=2 SV=1	666	20	0	97.99	13	P:GO:0030433; P:GO:0030968; P:GO:0042026; P:GO:0051085; F:GO:0005524; F:GO:0031072; F:GO:0044183; F:GO:0051082; F:GO:0051787; C:GO:0005634; C:GO:0005788; C:GO:0016020; C:GO:0034663	P:ubiquitin-dependent ERAD pathway; P:endoplasmic reticulum unfolded protein response; P:protein refolding; P:chaperone cofactor-dependent protein refolding; F:ATP binding; F:heat shock protein binding; F:protein folding chaperone; F:unfolded protein binding; F:misfolded protein binding; C:nucleus; C:endoplasmic reticulum lumen; C:membrane; C:endoplasmic reticulum chaperone complex
29	A0A3Q7HX02_SOLLC	UniRef90_Q03685	Cluster: Luminal-binding protein 5	UniProtKB Reviewed (Swiss-Prot); UniProtKB Unreviewed (TrEMBL); UniParc	40	Nicotiana tabacum (Common tobacco); Nicotiana attenuata (Coyote tobacco); Nicotiana sylvestris (Wood tobacco); Eucalyptus grandis (Flooded gum); Nymphaea colorata; Solanum lycopersicum (Tomato); Solanum chacoense (Chaco potato); Solanum tuberosum (Potato); Kingdonia uniflora; Populus deltoides (Eastern poplar); Lupinus albus (White lupine); Aquilegia coerulea (Rocky mountain columbine); Oryza mey…	668	0.9	luminal-binding protein	73859	29882.2	13	72	27.0431	11.5988	94	33.3919	true	[BLASTED, MAPPED, ANNOTATED]	tr|A0A3Q7HX02|A0A3Q7HX02_SOLLC	Uncharacterized protein OS=Solanum lycopersicum OX=4081 PE=3 SV=1	673	20	0	97.18	13	P:GO:0030433; P:GO:0030968; P:GO:0042026; P:GO:0051085; F:GO:0005524; F:GO:0031072; F:GO:0044183; F:GO:0051082; F:GO:0051787; C:GO:0005634; C:GO:0005788; C:GO:0016020; C:GO:0034663	P:ubiquitin-dependent ERAD pathway; P:endoplasmic reticulum unfolded protein response; P:protein refolding; P:chaperone cofactor-dependent protein refolding; F:ATP binding; F:heat shock protein binding; F:protein folding chaperone; F:unfolded protein binding; F:misfolded protein binding; C:nucleus; C:endoplasmic reticulum lumen; C:membrane; C:endoplasmic reticulum chaperone complex
30	A0A3Q7HZQ4_SOLLC	UniRef90_A0A3Q7HZQ4	Cluster: V-type proton ATPase subunit H	UniProtKB Unreviewed (TrEMBL)	1	Solanum lycopersicum (Tomato)	473	0.9	V-type proton ATPase subunit H-like	53742	7110.03	13	50	28.7526	5.6812	142	16.4906	true	[BLASTED, MAPPED, ANNOTATED]	tr|A0A3Q7HZQ4|A0A3Q7HZQ4_SOLLC	V-type proton ATPase subunit H OS=Solanum lycopersicum OX=4081 PE=3 SV=1	473	20	0	85.74	4	P:GO:1902600; F:GO:0020037; F:GO:0046961; C:GO:0000221	P:proton transmembrane transport; F:heme binding; F:proton-transporting ATPase activity, rotational mechanism; C:vacuolar proton-transporting V-type ATPase, V1 domain	EC:7.1.3.1	H(+)-exporting diphosphatase
31	A0A3Q7HUQ1_SOLLC	UniRef90_A0A3Q7HUQ1	Cluster: NAB domain-containing protein	UniProtKB Unreviewed (TrEMBL); UniParc	6	Solanum lycopersicum (Tomato); Solanum chilense (Tomato); Solanum tuberosum (Potato); Solanum pennellii; Solanum verrucosum; Solanum stenotomum	1341	0.9	COP1-interactive protein 1	153366	419.324	13	183	11.5585	4.4541	145	30.3704	true	[BLASTED, MAPPED, ANNOTATED]	tr|A0A3Q7HUQ1|A0A3Q7HUQ1_SOLLC	NAB domain-containing protein OS=Solanum lycopersicum OX=4081 GN=101256404 PE=4 SV=1	1341	20	0	84.13	1	F:GO:0003779	F:actin binding
32	Q9SYU8_SOLLC	UniRef90_P30221	Cluster: 17.8 kDa class I heat shock protein	UniProtKB Reviewed (Swiss-Prot); UniProtKB Unreviewed (TrEMBL); UniParc	58	Solanum lycopersicum (Tomato); Solanum peruvianum (Peruvian tomato); Solanum tuberosum (Potato); Solanum chilense (Tomato); Capsicum baccatum (Peruvian pepper); Capsicum chinense (Scotch bonnet); Capsicum annuum (Capsicum pepper); Nicotiana tabacum (Common tobacco); Nicotiana attenuata (Coyote tobacco); Nicotiana sylvestris (Wood tobacco); Escherichia coli; Solanum stenotomum; Solanum pennellii; …	154	0.9	17.6 kDa class I heat shock protein-like	17723	17313.4	11	17	57.7922	1.1756	116	13.7116	true	[BLASTED, MAPPED, ANNOTATED]	tr|Q9SYU8|Q9SYU8_SOLLC	17.7 kD class I small heat shock protein OS=Solanum lycopersicum OX=4081 GN=HSP17.7 PE=2 SV=1	154	20	4.66247e-106	97.79	8	P:GO:0006457; P:GO:0009408; P:GO:0009651; P:GO:0042542; P:GO:0051259; F:GO:0043621; F:GO:0051082; C:GO:0005737	P:protein folding; P:response to heat; P:response to salt stress; P:response to hydrogen peroxide; P:protein complex oligomerization; F:protein self-association; F:unfolded protein binding; C:cytoplasm
33	A0A3Q7FVM4_SOLLC	UniRef90_A0A1S4C5D8	Cluster: ras-related protein Rab7-like	UniProtKB Unreviewed (TrEMBL); UniParc	24	Nicotiana tabacum (Common tobacco); Nicotiana attenuata (Coyote tobacco); Nicotiana sylvestris (Wood tobacco); Papaver somniferum (Opium poppy); Solanum tuberosum (Potato); Solanum lycopersicum (Tomato); Solanum chilense (Tomato); Solanum chacoense (Chaco potato); Olea europaea subsp. europaea; Nicotiana benthamiana; Capsicum baccatum (Peruvian pepper); Capsicum chinense (Scotch bonnet); Capsicum…	205	0.9	ras-related protein Rab7	22954	9917.65	11	21	67.8049	2.0963	132	23.9938	true	[BLASTED, MAPPED, ANNOTATED]	tr|A0A3Q7FVM4|A0A3Q7FVM4_SOLLC	Uncharacterized protein OS=Solanum lycopersicum OX=4081 GN=101261599 PE=4 SV=1	205	20	5.90685e-151	98.76	3	F:GO:0003924; F:GO:0005525; C:GO:0005774	F:GTPase activity; F:GTP binding; C:vacuolar membrane	EC:3.6.1	Acting on acid anhydrides
34	A0A3Q7HU74_SOLLC	UniRef90_A0A3Q7HU74	Cluster: Tr-type G domain-containing protein	UniProtKB Unreviewed (TrEMBL)	1	Solanum lycopersicum (Tomato)	1112	0.9	translation initiation factor IF-2	121526	8228.72	11	88	11.9604	8.7852	140	17.1977	true	[BLASTED, MAPPED, ANNOTATED]	tr|A0A3Q7HU74|A0A3Q7HU74_SOLLC	Tr-type G domain-containing protein OS=Solanum lycopersicum OX=4081 PE=3 SV=1	1112	20	0	91	4	P:GO:0006413; F:GO:0003743; F:GO:0003924; F:GO:0005525	P:translational initiation; F:translation initiation factor activity; F:GTPase activity; F:GTP binding	EC:3.6.1	Acting on acid anhydrides
35	A0A3Q7I767_SOLLC	UniRef90_P10967	Cluster: 1-aminocyclopropane-1-carboxylate oxidase homolog	UniProtKB Reviewed (Swiss-Prot); UniProtKB Unreviewed (TrEMBL); UniParc	4	Solanum lycopersicum (Tomato); Solanum chilense (Tomato); Solanum pennellii	363	0.9	1-aminocyclopropane-1-carboxylate oxidase homolog	43732	3395.59	11	27	33.7629	0.6517	106	23.9769	true	[BLASTED, MAPPED, ANNOTATED]	tr|A0A3Q7I767|A0A3Q7I767_SOLLC	Fe2OG dioxygenase domain-containing protein OS=Solanum lycopersicum OX=4081 PE=3 SV=1	388	20	0	83.27	5	P:GO:0009693; P:GO:0009835; F:GO:0016491; F:GO:0031418; F:GO:0046872	P:ethylene biosynthetic process; P:fruit ripening; F:oxidoreductase activity; F:L-ascorbic acid binding; F:metal ion binding	EC:1	Oxidoreductases
36	A0A3Q7ENV3_SOLLC	UniRef90_A0A3Q7ENV3	Cluster: Protein disulfide-isomerase	UniProtKB Unreviewed (TrEMBL); UniParc	17	Solanum lycopersicum (Tomato); Solanum chacoense (Chaco potato); Solanum chilense (Tomato); Capsicum annuum (Capsicum pepper); Solanum tuberosum (Potato); Capsicum chinense (Scotch bonnet); Nicotiana tabacum (Common tobacco); Capsicum baccatum (Peruvian pepper); Nicotiana attenuata (Coyote tobacco); Nicotiana sylvestris (Wood tobacco); Solanum stenotomum; Solanum verrucosum; Solanum pennellii; Ni…	359	0.9	probable protein disulfide-isomerase A6	39429	3020.32	11	37	40.9471	0.7923	103	23.7775	true	[BLASTED, MAPPED, ANNOTATED]	tr|A0A3Q7ENV3|A0A3Q7ENV3_SOLLC	Protein disulfide-isomerase OS=Solanum lycopersicum OX=4081 GN=101244123 PE=3 SV=1	359	20	0	95.24	2	F:GO:0003756; C:GO:0005783	F:protein disulfide isomerase activity; C:endoplasmic reticulum	EC:5.3.4.1	Protein disulfide-isomerase
37	A0A3Q7HX95_SOLLC	UniRef90_Q2PYX3	Cluster: Fructose-bisphosphate aldolase	UniProtKB Unreviewed (TrEMBL); UniParc	34	Solanum tuberosum (Potato); Capsicum annuum (Capsicum pepper); Solanum chilense (Tomato); Solanum chacoense (Chaco potato); Nicotiana tabacum (Common tobacco); Nicotiana attenuata (Coyote tobacco); Capsicum chinense (Scotch bonnet); Solanum lycopersicum (Tomato); Capsicum baccatum (Peruvian pepper); Nicotiana sylvestris (Wood tobacco); Daucus carota subsp. sativus (Carrot); Solanum verrucosum; Pr…	358	0.9	fructose-bisphosphate aldolase cytoplasmic isozyme-like	38652	2205.13	11	30	41.8994	10.1729	76	26.3387	true	[BLASTED, MAPPED, ANNOTATED]	tr|A0A3Q7HX95|A0A3Q7HX95_SOLLC	Fructose-bisphosphate aldolase OS=Solanum lycopersicum OX=4081 GN=101266063 PE=3 SV=1	358	20	0	97.14	4	P:GO:0006096; P:GO:0030388; F:GO:0004332; C:GO:0005829	P:glycolytic process; P:fructose 1,6-bisphosphate metabolic process; F:fructose-bisphosphate aldolase activity; C:cytosol	EC:4.1.2.13	Fructose-bisphosphate aldolase
38	K7SGP9_SOLLC	UniRef90_K7SGP9	Cluster: Carboxylesterase 1	UniProtKB Unreviewed (TrEMBL)	7	Solanum lycopersicum (Tomato); Solanum galapagense; Solanum cheesmaniae (Galapagos Island tomato); Solanum chmielewskii; Solanum pennellii (Tomato); Solanum habrochaites (Wild tomato); Solanum pimpinellifolium (Currant tomato)	339	0.9	carboxylesterase 1	37717	1604.35	11	38	52.2124	0.7401	89	28.2908	true	[BLASTED, MAPPED, ANNOTATED]	tr|K7SGP9|K7SGP9_SOLLC	Carboxylesterase 1 OS=Solanum lycopersicum OX=4081 GN=CXE1 PE=4 SV=1	339	20	0	88.52	1	F:GO:0016787	F:hydrolase activity	EC:3	Hydrolases
39	A0A3Q7IXE6_SOLLC	UniRef90_A0A3Q7IXE6	Cluster: Patellin-3-like	UniProtKB Unreviewed (TrEMBL); UniParc	6	Solanum lycopersicum (Tomato); Solanum chilense (Tomato); Solanum tuberosum; Solanum verrucosum; Solanum stenotomum; Solanum pennellii	589	0.9	patellin-3-like	65654	1543.97	11	66	28.6927	0.9968	111	31.1582	true	[BLASTED, MAPPED, ANNOTATED]	tr|A0A3Q7IXE6|A0A3Q7IXE6_SOLLC	Uncharacterized protein OS=Solanum lycopersicum OX=4081 GN=101255264 PE=3 SV=1	589	20	0	81.97	3	P:GO:0007049; P:GO:0051301; F:GO:0008289	P:cell cycle; P:cell division; F:lipid binding
40	A0A3Q7GX91_SOLLC	UniRef90_A0A3Q7GX91	Cluster: mitogen-activated protein kinase	UniProtKB Unreviewed (TrEMBL); UniParc	2	Solanum lycopersicum (Tomato)	1275	0.9	mitogen-activated protein kinase 9-like	142212	1303.55	11	105	12.549	1.5891	67	27.1663	true	[BLASTED, MAPPED, ANNOTATED]	tr|A0A3Q7GX91|A0A3Q7GX91_SOLLC	Mitogen-activated protein kinase OS=Solanum lycopersicum OX=4081 PE=4 SV=1	1275	20	0	87.22	8	P:GO:0000165; P:GO:0006468; F:GO:0004674; F:GO:0004707; F:GO:0005524; F:GO:0106310; C:GO:0005634; C:GO:0005737	P:MAPK cascade; P:protein phosphorylation; F:protein serine/threonine kinase activity; F:MAP kinase activity; F:ATP binding; F:protein serine kinase activity; C:nucleus; C:cytoplasm	EC:2.7.11.24; EC:2.7.11.1	Mitogen-activated protein kinase; Non-specific serine/threonine protein kinase
41	A0A3Q7E9M8_SOLLC	UniRef90_A0A3Q7E9M8	Cluster: ADP-ribosylation factor 2	UniProtKB Unreviewed (TrEMBL)	1	Solanum lycopersicum (Tomato)	209	0.9	ADP-ribosylation factor 2	24147	24549.4	10	19	61.7225	4.4415	119	22.4335	true	[BLASTED, MAPPED, ANNOTATED]	tr|A0A3Q7E9M8|A0A3Q7E9M8_SOLLC	Uncharacterized protein OS=Solanum lycopersicum OX=4081 PE=3 SV=1	209	20	1.25204e-130	97.44	3	F:GO:0003924; F:GO:0005525; C:GO:0009507	F:GTPase activity; F:GTP binding; C:chloroplast	EC:3.6.1	Acting on acid anhydrides
42	A0A3Q7EQU5_SOLLC	UniRef90_A2XLF2	Cluster: Actin-1	UniProtKB Reviewed (Swiss-Prot); UniProtKB Unreviewed (TrEMBL); UniParc	52	Oryza sativa subsp. indica (Rice); Oryza sativa subsp. japonica (Rice); Solanum tuberosum (Potato); Oryza punctata (Red rice); Oryza barthii; Oryza glaberrima (African rice); Oryza rufipogon (Brownbeard rice); Oryza sativa (Rice); Oryza meridionalis; Oryza nivara (Indian wild rice); Oryza glumipatula; Eucalyptus grandis (Flooded gum); Triticum aestivum (Wheat); Phyllostachys bambusoides (timber b…	377	0.9	actin-101	41643	19876.2	10	38	31.0345	11.9086	80	18.0562	true	[BLASTED, MAPPED, ANNOTATED]	tr|A0A3Q7EQU5|A0A3Q7EQU5_SOLLC	Uncharacterized protein OS=Solanum lycopersicum OX=4081 GN=101250165 PE=3 SV=1	377	20	0	99.84	3	F:GO:0005524; C:GO:0005737; C:GO:0005856	F:ATP binding; C:cytoplasm; C:cytoskeleton
43	A0A3Q7ETC3_SOLLC	UniRef90_A0A7C9EV18	Cluster: Ras-related protein Rab7	UniProtKB Unreviewed (TrEMBL); UniParc	27	Opuntia streptacantha (Prickly pear cactus); Sesamum indicum (Oriental sesame); Solanum tuberosum (Potato); Capsicum baccatum (Peruvian pepper); Solanum chacoense (Chaco potato); Solanum lycopersicum (Tomato); Solanum chilense (Tomato); Capsicum chinense (Scotch bonnet); Capsicum annuum (Capsicum pepper); Brassica carinata (Ethiopian mustard); Brassica oleracea var. oleracea; Brassica oleracea (W…	230	0.9	Ras-related protein Rab7	22999	16121.4	10	21	63.5922	2.1905	173	19.1919	true	[BLASTED, MAPPED, ANNOTATED]	tr|A0A3Q7ETC3|A0A3Q7ETC3_SOLLC	Uncharacterized protein OS=Solanum lycopersicum OX=4081 GN=101263553 PE=4 SV=1	206	20	2.89508e-151	98.64	3	F:GO:0003924; F:GO:0005525; C:GO:0005774	F:GTPase activity; F:GTP binding; C:vacuolar membrane	EC:3.6.1	Acting on acid anhydrides
44	A0A3Q7EZ16_SOLLC	UniRef90_Q41418	Cluster: 14-3-3-like protein	UniProtKB Reviewed (Swiss-Prot); UniProtKB Unreviewed (TrEMBL); UniParc	174	Solanum tuberosum (Potato); Tripterygium wilfordii (Thunder God vine); Juglans regia (English walnut); Carya illinoinensis (Pecan); Castanea mollissima (Chinese chestnut); Quercus lobata (Valley oak); Carpinus fangiana; Fagus sylvatica (Beechnut); Manihot esculenta (Cassava); Hevea brasiliensis (Para rubber tree); Rhodamnia argentea; Jatropha curcas (Barbados nut); Cucumis sativus (Cucumber); Cuc…	259	0.9	14-3-3 protein 4	29320	6608.37	10	32	44.2308	9.7577	92	25.1917	true	[BLASTED, MAPPED, ANNOTATED]	tr|A0A3Q7EZ16|A0A3Q7EZ16_SOLLC	14_3_3 domain-containing protein OS=Solanum lycopersicum OX=4081 GN=543791 PE=3 SV=1	260	20	0	97.82	12	P:GO:0007165; P:GO:0046686; P:GO:0090378; F:GO:0005524; F:GO:0019904; F:GO:0043130; F:GO:0046982; C:GO:0005618; C:GO:0005739; C:GO:0005794; C:GO:0005829; C:GO:0005886	P:signal transduction; P:response to cadmium ion; P:seed trichome elongation; F:ATP binding; F:protein domain specific binding; F:ubiquitin binding; F:protein heterodimerization activity; C:cell wall; C:mitochondrion; C:Golgi apparatus; C:cytosol; C:plasma membrane
45	A0A3Q7IAW2_SOLLC	UniRef90_A0A3Q7IAW2	Cluster: Ras-related protein RABB1c	UniProtKB Unreviewed (TrEMBL); UniParc	29	Solanum lycopersicum (Tomato); Solanum chacoense (Chaco potato); Solanum chilense (Tomato); Solanum tuberosum (Potato); Capsicum baccatum (Peruvian pepper); Nicotiana tabacum (Common tobacco); Nicotiana sylvestris (Wood tobacco); Coffea canephora (Robusta coffee); Coffea arabica (Arabian coffee); Nicotiana attenuata (Coyote tobacco); Capsicum annuum (Capsicum pepper); Nicotiana alata (Winged toba…	211	0.9	ras-related protein RABB1c	23140	5888.34	10	25	55.4502	3.243	83	20.713	true	[BLASTED, MAPPED, ANNOTATED]	tr|A0A3Q7IAW2|A0A3Q7IAW2_SOLLC	Uncharacterized protein OS=Solanum lycopersicum OX=4081 GN=101253324 PE=4 SV=1	211	20	3.90366e-156	99.67	7	P:GO:0006888; P:GO:0015031; F:GO:0003924; F:GO:0005525; C:GO:0005773; C:GO:0005794; C:GO:0005886	P:endoplasmic reticulum to Golgi vesicle-mediated transport; P:protein transport; F:GTPase activity; F:GTP binding; C:vacuole; C:Golgi apparatus; C:plasma membrane	EC:3.6.1	Acting on acid anhydrides
46	A0A3Q7H717_SOLLC	UniRef90_A0A151SPM5	Cluster: H(+)-exporting diphosphatase	UniProtKB Unreviewed (TrEMBL); UniParc	97	Cajanus cajan (Pigeon pea); Solanum chacoense (Chaco potato); Solanum pimpinellifolium (Currant tomato); Capsicum chinense (Scotch bonnet); Arachis hypogaea (Peanut); Arachis duranensis (Wild peanut); Capsicum annuum (Capsicum pepper); Capsicum baccatum (Peruvian pepper); Solanum chilense (Tomato); Solanum lycopersicum (Tomato); Solanum tuberosum (Potato); Cannabis sativa (Hemp); Artemisia annua …	772	0.9	pyrophosphate-energized vacuolar membrane proton pump	80186	2970.69	10	41	14.2484	0.9016	86	27.0716	true	[BLASTED, MAPPED, ANNOTATED]	tr|A0A3Q7H717|A0A3Q7H717_SOLLC	H(+)-exporting diphosphatase OS=Solanum lycopersicum OX=4081 GN=543761 PE=3 SV=1	765	20	0	98.18	4	P:GO:1902600; F:GO:0004427; F:GO:0009678; C:GO:0016021	P:proton transmembrane transport; F:inorganic diphosphatase activity; F:pyrophosphate hydrolysis-driven proton transmembrane transporter activity; C:integral component of membrane	EC:7.1.3.1; EC:3.6.1.1	H(+)-exporting diphosphatase; Inorganic diphosphatase
47	A0A3Q7I3U9_SOLLC	UniRef90_A0A3Q7I3U9	Cluster: Enoyl reductase (ER) domain-containing protein	UniProtKB Unreviewed (TrEMBL); UniParc	9	Solanum lycopersicum (Tomato); Solanum chacoense (Chaco potato); Solanum tuberosum (Potato); Capsicum chinense (Scotch bonnet); Solanum pennellii; Solanum stenotomum; Solanum verrucosum	329	0.9	chloroplast envelope quinone oxidoreductase homolog	34450	2496.13	10	30	41.9453	0.8317	106	31.1335	true	[BLASTED, MAPPED, ANNOTATED]	tr|A0A3Q7I3U9|A0A3Q7I3U9_SOLLC	PKS_ER domain-containing protein OS=Solanum lycopersicum OX=4081 GN=101243822 PE=4 SV=1	329	20	0	94.16	1	F:GO:0016491	F:oxidoreductase activity	EC:1	Oxidoreductases
48	A0A3Q7FNZ8_SOLLC	UniRef90_A0A3Q7FNZ8	Cluster: CaM_binding domain-containing protein	UniProtKB Unreviewed (TrEMBL); UniParc	5	Solanum lycopersicum (Tomato); Solanum chilense (Tomato); Solanum pennellii	392	0.9	putative lisH domain-containing protein-like isoform X2	41998	2068.79	10	43	36.9898	25.8284	96	39.7638	true	[BLASTED]	tr|A0A3Q7FNZ8|A0A3Q7FNZ8_SOLLC	Uncharacterized protein OS=Solanum lycopersicum OX=4081 PE=4 SV=1	392	20	0	69.86
49	A0A3Q7GDG7_SOLLC	UniRef90_P25858	Cluster: Glyceraldehyde-3-phosphate dehydrogenase GAPC1, cytosolic	UniProtKB Reviewed (Swiss-Prot); UniProtKB Unreviewed (TrEMBL); UniParc	254	Arabidopsis thaliana (Mouse-ear cress); Sinapis alba (White mustard); Arabidopsis suecica (Swedish thale-cress); Brassica oleracea (Wild cabbage); Brassica campestris (Field mustard); Brassica napus (Rape); Eruca vesicaria subsp. sativa (Garden rocket); Braya pilosa; Brassica oleracea var. oleracea; Quercus ilex (Holly oak); Castanea mollissima (Chinese chestnut); Carthamus tinctorius (Safflower)…	338	0.9	glyceraldehyde-3-phosphate dehydrogenase, cytosolic	36650	1312.65	10	28	31.6568	9.0607	75	36.3534	true	[BLASTED, MAPPED, ANNOTATED]	tr|A0A3Q7GDG7|A0A3Q7GDG7_SOLLC	Glyceraldehyde-3-phosphate dehydrogenase OS=Solanum lycopersicum OX=4081 GN=101258368 PE=3 SV=1	338	20	0	98.14	6	P:GO:0006006; P:GO:0006096; F:GO:0004365; F:GO:0050661; F:GO:0051287; C:GO:0005829	P:glucose metabolic process; P:glycolytic process; F:glyceraldehyde-3-phosphate dehydrogenase (NAD+) (phosphorylating) activity; F:NADP binding; F:NAD binding; C:cytosol	EC:1.2.1.59; EC:1.2.1.12	Glyceraldehyde-3-phosphate dehydrogenase (NAD(P)(+)) (phosphorylating); Glyceraldehyde-3-phosphate dehydrogenase (phosphorylating)
50	A0A3Q7EHP1_SOLLC	UniRef90_A0A3Q7EHP1	Cluster: ABC-type xenobiotic transporter	UniProtKB Unreviewed (TrEMBL); UniParc	6	Solanum lycopersicum (Tomato); Solanum chilense (Tomato); Solanum tuberosum (Potato); Solanum verrucosum; Solanum stenotomum	1498	0.9	ABC transporter C family member 14-like	168448	438.498	10	112	7.6769	6.9084	145	31.5887	true	[BLASTED, MAPPED, ANNOTATED]	tr|A0A3Q7EHP1|A0A3Q7EHP1_SOLLC	Uncharacterized protein OS=Solanum lycopersicum OX=4081 GN=101246375 PE=4 SV=1	1498	20	0	90.13	6	P:GO:0055085; F:GO:0005524; F:GO:0140359; C:GO:0000325; C:GO:0005774; C:GO:0016021	P:transmembrane transport; F:ATP binding; F:ABC-type transporter activity; C:plant-type vacuole; C:vacuolar membrane; C:integral component of membrane	EC:7	Translocases
51	A0A3Q7EUT1_SOLLC	UniRef90_A0A068V178	Cluster: ATP-synt_ab_N domain-containing protein	UniProtKB Unreviewed (TrEMBL); UniParc	6	Coffea canephora (Robusta coffee); Solanum lycopersicum (Tomato); Triticum aestivum	132	0.9	V-type proton ATPase subunit B2	14069	30994.4	9	12	70.229	6.4171	141	19.6422	true	[BLASTED, MAPPED, ANNOTATED]	tr|A0A3Q7EUT1|A0A3Q7EUT1_SOLLC	ATP-synt_ab_N domain-containing protein OS=Solanum lycopersicum OX=4081 PE=3 SV=1	131	20	8.13423e-83	98.53	5	P:GO:0046034; P:GO:1902600; F:GO:0005524; C:GO:0009536; C:GO:0033180	P:ATP metabolic process; P:proton transmembrane transport; F:ATP binding; C:plastid; C:proton-transporting V-type ATPase, V1 domain
52	Q9LKG0_SOLLC	UniRef90_A0A3Q7HKZ6	Cluster: V-type proton ATPase subunit E	UniProtKB Unreviewed (TrEMBL); UniParc	15	Solanum lycopersicum (Tomato); Capsicum baccatum (Peruvian pepper); Solanum tuberosum (Potato); Capsicum annuum (Capsicum pepper); Nicotiana tabacum (Common tobacco); Nicotiana sylvestris (Wood tobacco); Solanum chacoense (Chaco potato); Nicotiana attenuata (Coyote tobacco); Capsicum chinense (Scotch bonnet); Solanum chilense (Tomato); Solanum pennellii	241	0.9	V-type proton ATPase subunit E-like	27114	8333.97	9	27	35.443	1.8897	104	13.32	true	[BLASTED, MAPPED, ANNOTATED]	tr|Q9LKG0|Q9LKG0_SOLLC	Putative vacuolar proton ATPase subunit E (Fragment) OS=Solanum lycopersicum OX=4081 PE=2 SV=1	237	20	3.98458e-169	94.78	4	P:GO:1902600; F:GO:0008553; F:GO:0046961; C:GO:0033178	P:proton transmembrane transport; F:P-type proton-exporting transporter activity; F:proton-transporting ATPase activity, rotational mechanism; C:proton-transporting two-sector ATPase complex, catalytic domain	EC:7.1.3.1; EC:7.1.2.1	H(+)-exporting diphosphatase; P-type H(+)-exporting transporter
53	Q9SYV0_SOLLC	UniRef90_P30221	Cluster: 17.8 kDa class I heat shock protein	UniProtKB Reviewed (Swiss-Prot); UniProtKB Unreviewed (TrEMBL); UniParc	58	Solanum lycopersicum (Tomato); Solanum peruvianum (Peruvian tomato); Solanum tuberosum (Potato); Solanum chilense (Tomato); Capsicum baccatum (Peruvian pepper); Capsicum chinense (Scotch bonnet); Capsicum annuum (Capsicum pepper); Nicotiana tabacum (Common tobacco); Nicotiana attenuata (Coyote tobacco); Nicotiana sylvestris (Wood tobacco); Escherichia coli; Solanum stenotomum; Solanum pennellii; …	154	0.9	17.7 kDa class I heat shock protein-like	17633	8310.93	9	17	45.4545	1.3682	87	15.2023	true	[BLASTED, MAPPED, ANNOTATED]	tr|Q9SYV0|Q9SYV0_SOLLC	17.6 kD class I small heat shock protein OS=Solanum lycopersicum OX=4081 GN=HSP17.6 PE=2 SV=1	154	20	3.31785e-106	98.9	8	P:GO:0006457; P:GO:0009408; P:GO:0009651; P:GO:0042542; P:GO:0051259; F:GO:0043621; F:GO:0051082; C:GO:0005737	P:protein folding; P:response to heat; P:response to salt stress; P:response to hydrogen peroxide; P:protein complex oligomerization; F:protein self-association; F:unfolded protein binding; C:cytoplasm
54	Q7XZS6_SOLLC	UniRef90_A0A1U8HA99	Cluster: Glutathione peroxidase	UniProtKB Unreviewed (TrEMBL); UniParc	15	Capsicum annuum (Capsicum pepper); Capsicum baccatum (Peruvian pepper); Capsicum chinense (Scotch bonnet); Solanum chacoense (Chaco potato); Solanum lycopersicum (Tomato); Nicotiana tabacum (Common tobacco); Solanum chilense (Tomato); Nicotiana attenuata; Solanum tuberosum; Solanum pennellii; Solanum stenotomum; Solanum verrucosum	200	0.9	probable glutathione peroxidase 2	18918	7731.85	9	18	52.0958	1.4037	89	17.9734	true	[BLASTED, MAPPED, ANNOTATED]	tr|Q7XZS6|Q7XZS6_SOLLC	Glutathione peroxidase OS=Solanum lycopersicum OX=4081 PE=2 SV=1	167	20	1.75915e-118	97.71	5	P:GO:0006979; P:GO:0098869; F:GO:0004602; C:GO:0005829; C:GO:0016021	P:response to oxidative stress; P:cellular oxidant detoxification; F:glutathione peroxidase activity; C:cytosol; C:integral component of membrane	EC:1.11.1.9	Glutathione peroxidase
55	EF1A_SOLLC	UniRef90_P25698	Cluster: Elongation factor 1-alpha	UniProtKB Reviewed (Swiss-Prot); UniProtKB Unreviewed (TrEMBL); UniParc	172	Glycine max (Soybean); Solanum lycopersicum (Tomato); Hordeum vulgare (Barley); Daucus carota (Wild carrot); Zingiber officinale (Ginger); Aegilops tauschii subsp. strangulata (Goatgrass); Lolium multiflorum (Italian ryegrass); Chrysanthemum indicum; Salix brachista; Salix suchowensis; Cichorium intybus (Chicory); Nitriliruptoraceae bacterium ZYF776; Carthamus tinctorius (Safflower); Tripterygium…	447	0.9	elongation factor 1-alpha	49256	6476.45	9	46	22.3214	1.1306	81	11.964	true	[BLASTED, MAPPED, ANNOTATED]	sp|P17786|EF1A_SOLLC	Elongation factor 1-alpha OS=Solanum lycopersicum OX=4081 PE=2 SV=1	448	20	0	99.91	5	P:GO:0006414; F:GO:0003746; F:GO:0003924; F:GO:0005525; C:GO:0005737	P:translational elongation; F:translation elongation factor activity; F:GTPase activity; F:GTP binding; C:cytoplasm	EC:3.6.1	Acting on acid anhydrides
56	A0A3Q7G6P9_SOLLC	UniRef90_A0A3Q7G6P9	Cluster: Ras-related protein Rab7	UniProtKB Unreviewed (TrEMBL)	2	Solanum lycopersicum (Tomato); Nicotiana tabacum (Common tobacco)	195	0.9	ras-related protein Rab7	22254	4646.65	9	20	58.4615	0.7792	81	12.0483	true	[BLASTED, MAPPED, ANNOTATED]	tr|A0A3Q7G6P9|A0A3Q7G6P9_SOLLC	Uncharacterized protein OS=Solanum lycopersicum OX=4081 PE=4 SV=1	195	20	1.12138e-130	97.98	3	F:GO:0003924; F:GO:0005525; C:GO:0005774	F:GTPase activity; F:GTP binding; C:vacuolar membrane	EC:3.6.1	Acting on acid anhydrides
57	A0A3Q7G327_SOLLC	UniRef90_O82702	Cluster: V-type proton ATPase subunit G 1	UniProtKB Reviewed (Swiss-Prot); UniProtKB Unreviewed (TrEMBL)	12	Nicotiana tabacum (Common tobacco); Capsicum chinense (Scotch bonnet); Capsicum baccatum (Peruvian pepper); Solanum chilense (Tomato); Solanum tuberosum (Potato); Solanum chacoense (Chaco potato); Solanum lycopersicum (Tomato); Capsicum annuum (Capsicum pepper); Nicotiana sylvestris (Wood tobacco); Nicotiana attenuata (Coyote tobacco)	110	0.9	V-type proton ATPase subunit G 2	12501	4037.79	9	13	64.8649	0.5443	82	17.9115	true	[BLASTED, MAPPED, ANNOTATED]	tr|A0A3Q7G327|A0A3Q7G327_SOLLC	V-type proton ATPase subunit G OS=Solanum lycopersicum OX=4081 GN=101258944 PE=3 SV=1	111	20	3.80846e-72	93.07	3	P:GO:1902600; F:GO:0042626; C:GO:0016471	P:proton transmembrane transport; F:ATPase-coupled transmembrane transporter activity; C:vacuolar proton-transporting V-type ATPase complex	EC:7	Translocases
58	A0A3Q7F8M2_SOLLC	UniRef90_M0ZSL2	Cluster: H(+)-exporting diphosphatase	UniProtKB Unreviewed (TrEMBL); UniParc	16	Solanum tuberosum (Potato); Actinidia chinensis var. chinensis (Chinese soft-hair kiwi); Actinidia rufa; Capsicum annuum (Capsicum pepper); Capsicum chinense (Scotch bonnet); Nicotiana tabacum (Common tobacco); Capsicum baccatum (Peruvian pepper); Solanum lycopersicum (Tomato); Nicotiana sylvestris (Wood tobacco); Solanum chilense (Tomato); Solanum pennellii; Solanum verrucosum; Nicotiana tomento…	761	0.9	pyrophosphate-energized vacuolar membrane proton pump 1-like	79926	2736.11	9	42	18.3968	2.1518	74	27.0315	true	[BLASTED, MAPPED, ANNOTATED]	tr|A0A3Q7F8M2|A0A3Q7F8M2_SOLLC	H(+)-exporting diphosphatase OS=Solanum lycopersicum OX=4081 GN=101246569 PE=3 SV=1	761	20	0	97.35	4	P:GO:1902600; F:GO:0004427; F:GO:0009678; C:GO:0016021	P:proton transmembrane transport; F:inorganic diphosphatase activity; F:pyrophosphate hydrolysis-driven proton transmembrane transporter activity; C:integral component of membrane	EC:7.1.3.1; EC:3.6.1.1	H(+)-exporting diphosphatase; Inorganic diphosphatase
59	ENO_SOLLC	UniRef90_P26300	Cluster: Enolase	UniProtKB Reviewed (Swiss-Prot); UniProtKB Unreviewed (TrEMBL); UniParc	14	Solanum lycopersicum (Tomato); Capsicum annuum (Capsicum pepper); Nicotiana tabacum (Common tobacco); Solanum chilense (Tomato); Solanum tuberosum (Potato); Nicotiana sylvestris (Wood tobacco); Solanum chacoense (Chaco potato); Nicotiana attenuata (Coyote tobacco); Capsicum baccatum (Peruvian pepper); Solanum pennellii; Solanum verrucosum	444	0.9	enolase	47768	1763.48	9	42	32.6577	4.0525	82	25.9534	true	[BLASTED, MAPPED, ANNOTATED]	sp|P26300|ENO_SOLLC	Enolase OS=Solanum lycopersicum OX=4081 GN=PGH1 PE=2 SV=1	444	20	0	98.4	5	P:GO:0006096; P:GO:0032889; F:GO:0000287; F:GO:0004634; C:GO:0000015	P:glycolytic process; P:regulation of vacuole fusion, non-autophagic; F:magnesium ion binding; F:phosphopyruvate hydratase activity; C:phosphopyruvate hydratase complex	EC:4.2.1.11	Phosphopyruvate hydratase
60	A0A3Q7GKD7_SOLLC	UniRef90_A0A1S4CM79	Cluster: Malic enzyme	UniProtKB Unreviewed (TrEMBL); UniParc	21	Nicotiana tabacum (Common tobacco); Nicotiana sylvestris (Wood tobacco); Nicotiana attenuata (Coyote tobacco); Cuscuta campestris; Solanum chacoense (Chaco potato); Solanum tuberosum (Potato); Solanum habrochaites (Wild tomato); Solanum lycopersicum (Tomato); Solanum chilense (Tomato); Capsicum annuum (Capsicum pepper); Capsicum chinense (Scotch bonnet); Capsicum baccatum (Peruvian pepper); Ipomo…	591	0.9	NADP-dependent malic enzyme	64071	1749.75	9	52	26.4249	4.5266	67	30.71	true	[BLASTED, MAPPED, ANNOTATED]	tr|A0A3Q7GKD7|A0A3Q7GKD7_SOLLC	Malic enzyme OS=Solanum lycopersicum OX=4081 GN=543522 PE=3 SV=1	579	20	0	96.61	7	P:GO:0006090; P:GO:0006108; F:GO:0004471; F:GO:0004473; F:GO:0046872; F:GO:0051287; C:GO:0009507	P:pyruvate metabolic process; P:malate metabolic process; F:malate dehydrogenase (decarboxylating) (NAD+) activity; F:malate dehydrogenase (decarboxylating) (NADP+) activity; F:metal ion binding; F:NAD binding; C:chloroplast	EC:1.1.1.38; EC:1.1.1.39; EC:1.1.1.40	Malate dehydrogenase (oxaloacetate-decarboxylating); Malate dehydrogenase (decarboxylating); Malate dehydrogenase (oxaloacetate-decarboxylating) (NADP(+))
61	A0A3Q7J5Z9_SOLLC	UniRef90_O22402	Cluster: Guanosine nucleotide diphosphate dissociation inhibitor	UniProtKB Unreviewed (TrEMBL); UniParc	26	Nicotiana tabacum (Common tobacco); Nicotiana sylvestris (Wood tobacco); Nicotiana attenuata (Coyote tobacco); Olea europaea subsp. europaea; Handroanthus impetiginosus; Helianthus annuus (Common sunflower); Phtheirospermum japonicum; Striga asiatica (Asiatic witchweed); Solanum chacoense (Chaco potato); Sesamum indicum (Oriental sesame); Solanum lycopersicum (Tomato); Solanum tuberosum (Potato);…	444	0.9	guanosine nucleotide diphosphate dissociation inhibitor 2	49685	839.697	9	35	28.6036	6.4351	75	27.4699	true	[BLASTED, MAPPED, ANNOTATED]	tr|A0A3Q7J5Z9|A0A3Q7J5Z9_SOLLC	Guanosine nucleotide diphosphate dissociation inhibitor OS=Solanum lycopersicum OX=4081 GN=101259410 PE=3 SV=1	444	20	0	98.56	6	P:GO:0007264; P:GO:0015031; P:GO:0016192; P:GO:0050790; F:GO:0005093; C:GO:0005737	P:small GTPase mediated signal transduction; P:protein transport; P:vesicle-mediated transport; P:regulation of catalytic activity; F:Rab GDP-dissociation inhibitor activity; C:cytoplasm
62	A0A3Q7F872_SOLLC	UniRef90_A0A1S3YWY0	Cluster: mediator of RNA polymerase II transcription subunit 37a-like	UniProtKB Unreviewed (TrEMBL); UniParc	17	Nicotiana tabacum (Common tobacco); Solanum lycopersicum (Tomato); Solanum chilense (Tomato); Solanum tuberosum (Potato); Solanum chacoense (Chaco potato); Nicotiana sylvestris (Wood tobacco); Nicotiana attenuata (Coyote tobacco); Capsicum annuum (Capsicum pepper); Capsicum chinense (Scotch bonnet); Capsicum baccatum (Peruvian pepper); Solanum pennellii	668	0.9	luminal-binding protein 5	74724	29359.8	8	69	14.6269	20.46	65	33.4147	true	[BLASTED, MAPPED, ANNOTATED]	tr|A0A3Q7F872|A0A3Q7F872_SOLLC	Uncharacterized protein OS=Solanum lycopersicum OX=4081 PE=3 SV=1	670	20	0	96.13	13	P:GO:0030433; P:GO:0030968; P:GO:0042026; P:GO:0051085; F:GO:0005524; F:GO:0031072; F:GO:0044183; F:GO:0051082; F:GO:0051787; C:GO:0005634; C:GO:0005788; C:GO:0016020; C:GO:0034663	P:ubiquitin-dependent ERAD pathway; P:endoplasmic reticulum unfolded protein response; P:protein refolding; P:chaperone cofactor-dependent protein refolding; F:ATP binding; F:heat shock protein binding; F:protein folding chaperone; F:unfolded protein binding; F:misfolded protein binding; C:nucleus; C:endoplasmic reticulum lumen; C:membrane; C:endoplasmic reticulum chaperone complex
63	A0A3Q7FJJ3_SOLLC	UniRef90_P53492	Cluster: Actin-7	UniProtKB Reviewed (Swiss-Prot); UniProtKB Unreviewed (TrEMBL); UniParc	1381	Arabidopsis thaliana (Mouse-ear cress); Oryza sativa subsp. indica (Rice); Oryza sativa subsp. japonica (Rice); Solanum tuberosum (Potato); Arabidopsis suecica (Swedish thale-cress); Arabidopsis thaliana x Arabidopsis arenosa; Arabidopsis arenosa (Sand rock-cress); Arabidopsis lyrata subsp. lyrata (Lyre-leaved rock-cress); Parthenium argentatum (Guayule rubber plant); Vitis vinifera (Grape); Prun…	377	0.9	actin-7	41730	24384	8	38	25.4642	1.429	96	11.2065	true	[BLASTED, MAPPED, ANNOTATED]	tr|A0A3Q7FJJ3|A0A3Q7FJJ3_SOLLC	Uncharacterized protein OS=Solanum lycopersicum OX=4081 GN=101264601 PE=3 SV=1	377	20	0	99.88	6	P:GO:0051301; F:GO:0005524; C:GO:0005829; C:GO:0005856; C:GO:0005886; C:GO:0009506	P:cell division; F:ATP binding; C:cytosol; C:cytoskeleton; C:plasma membrane; C:plasmodesma
64	Q38JD4_SOLLC	UniRef90_Q38JD4	Cluster: Temperature-induced lipocalin	UniProtKB Unreviewed (TrEMBL)	6	Solanum lycopersicum (Tomato); Solanum tuberosum (Potato); Solanum chilense (Tomato); Solanum chacoense (Chaco potato)	185	0.9	temperature-induced lipocalin	21451	16277.7	8	18	45.4054	1.1163	122	14.4485	true	[BLASTED, MAPPED, ANNOTATED]	tr|Q38JD4|Q38JD4_SOLLC	Temperature-induced lipocalin OS=Solanum lycopersicum OX=4081 GN=TIL PE=2 SV=1	185	20	3.68952e-134	94.18	4	P:GO:0000302; P:GO:0006629; F:GO:0052662; C:GO:0005737	P:response to reactive oxygen species; P:lipid metabolic process; F:zeaxanthin epoxidase activity; C:cytoplasm	EC:1.14.15.21	Zeaxanthin epoxidase
65	A0A3Q7FZ41_SOLLC	UniRef90_A0A3Q7FZ41	Cluster: Ras-related protein RABE1c-like	UniProtKB Unreviewed (TrEMBL)	8	Solanum lycopersicum (Tomato); Solanum chilense (Tomato); Capsicum baccatum (Peruvian pepper); Capsicum chinense (Scotch bonnet); Capsicum annuum (Capsicum pepper); Solanum tuberosum (Potato)	216	0.9	ras-related protein RABE1c-like	23882	6484.64	8	24	35.1852	1.0866	60	20.554	true	[BLASTED, MAPPED, ANNOTATED]	tr|A0A3Q7FZ41|A0A3Q7FZ41_SOLLC	Uncharacterized protein OS=Solanum lycopersicum OX=4081 GN=544288 PE=4 SV=1	216	20	9.47479e-158	97.41	6	P:GO:0006904; P:GO:0009306; P:GO:0017157; F:GO:0003925; F:GO:0005525; C:GO:0005886	P:vesicle docking involved in exocytosis; P:protein secretion; P:regulation of exocytosis; F:G protein activity; F:GTP binding; C:plasma membrane	EC:3.6.1; EC:3.6.5.1; EC:3.6.5.2	Acting on acid anhydrides; Heterotrimeric G-protein GTPase; Small monomeric GTPase
66	A0A3Q7IAT1_SOLLC	UniRef90_A0A3Q7IAT1	Cluster: Plasma membrane-associated cation-binding protein 1	UniProtKB Unreviewed (TrEMBL); UniParc	5	Solanum lycopersicum (Tomato); Solanum chilense (Tomato); Solanum pennellii; Solanum stenotomum; Solanum verrucosum	201	0.9	plasma membrane-associated cation-binding protein 1	21918	6467.36	8	29	57.2139	0.9681	97	25.2786	true	[BLASTED, MAPPED, ANNOTATED]	tr|A0A3Q7IAT1|A0A3Q7IAT1_SOLLC	Uncharacterized protein OS=Solanum lycopersicum OX=4081 GN=101260974 PE=4 SV=1	201	20	7.00004e-135	87.22	1	C:GO:0046658	C:anchored component of plasma membrane
67	A0A3Q7EKG5_SOLLC	UniRef90_A0A3Q7EKG5	Cluster: Fe2OG dioxygenase domain-containing protein	UniProtKB Unreviewed (TrEMBL)	1	Solanum lycopersicum (Tomato)	568	0.9	flavanone 3-dioxygenase 3-like	63655	6215.85	8	49	17.2535	11.0907	58	31.1924	true	[BLASTED, MAPPED, ANNOTATED]	tr|A0A3Q7EKG5|A0A3Q7EKG5_SOLLC	Fe2OG dioxygenase domain-containing protein OS=Solanum lycopersicum OX=4081 PE=3 SV=1	568	20	0	81.45	3	F:GO:0016491; F:GO:0031418; F:GO:0046872	F:oxidoreductase activity; F:L-ascorbic acid binding; F:metal ion binding	EC:1	Oxidoreductases
68	A0A3Q7FJI3_SOLLC	UniRef90_A0A3Q7FJI3	Cluster: Fe2OG dioxygenase domain-containing protein	UniProtKB Unreviewed (TrEMBL); UniParc	7	Solanum lycopersicum (Tomato); Solanum lycopersicum var. cerasiforme; Solanum chilense (Tomato); Solanum pennellii	321	0.9	probable 2-oxoglutarate-dependent dioxygenase AOP1	36506	5406.9	8	22	49.2212	0.6667	109	25.3265	true	[BLASTED, MAPPED, ANNOTATED]	tr|A0A3Q7FJI3|A0A3Q7FJI3_SOLLC	Fe2OG dioxygenase domain-containing protein OS=Solanum lycopersicum OX=4081 GN=104644281 PE=3 SV=1	321	20	0	89.76	3	F:GO:0031418; F:GO:0046872; F:GO:0051213	F:L-ascorbic acid binding; F:metal ion binding; F:dioxygenase activity	EC:1	Oxidoreductases
69	A0A3Q7IR67_SOLLC	UniRef90_P93206	Cluster: 14-3-3 protein 1	UniProtKB Reviewed (Swiss-Prot); UniProtKB Unreviewed (TrEMBL); UniParc	18	Solanum lycopersicum (Tomato); Nicotiana tabacum (Common tobacco); Capsicum baccatum (Peruvian pepper); Capsicum chinense (Scotch bonnet); Capsicum annuum (Capsicum pepper); Nicotiana sylvestris (Wood tobacco); Solanum tuberosum (Potato); Solanum chacoense (Chaco potato); Solanum chilense (Tomato); Nicotiana attenuata (Coyote tobacco); Nicotiana tomentosiformis; Solanum stenotomum	249	0.9	14-3-3 protein 1	28183	3242.54	8	28	39.759	10.8749	51	29.375	true	[BLASTED]	tr|A0A3Q7IR67|A0A3Q7IR67_SOLLC	14_3_3 domain-containing protein OS=Solanum lycopersicum OX=4081 GN=101243846 PE=3 SV=1	249	20	0	97.97
70	A0A3Q7G7H8_SOLLC	UniRef90_P93209	Cluster: 14-3-3 protein 3	UniProtKB Reviewed (Swiss-Prot); UniProtKB Unreviewed (TrEMBL); UniParc	22	Solanum lycopersicum (Tomato); Nicotiana tabacum (Common tobacco); Solanum chilense (Tomato); Nicotiana attenuata (Coyote tobacco); Nicotiana sylvestris (Wood tobacco); Solanum tuberosum (Potato); Solanum chacoense (Chaco potato); Capsicum baccatum (Peruvian pepper); Capsicum chinense (Scotch bonnet); Capsicum annuum (Capsicum pepper); Kribbella monticola; Solanum stenotomum	260	0.9	14-3-3-like protein	30420	3038.15	8	31	33.209	16.4783	54	26.7663	true	[BLASTED]	tr|A0A3Q7G7H8|A0A3Q7G7H8_SOLLC	14_3_3 domain-containing protein OS=Solanum lycopersicum OX=4081 PE=3 SV=1	268	20	0	98.5
71	A0A3Q7HZL2_SOLLC	UniRef90_A0A3Q7HZL2	Cluster: SHSP domain-containing protein	UniProtKB Unreviewed (TrEMBL); UniParc	11	Solanum lycopersicum (Tomato); Solanum chacoense (Chaco potato); Solanum chilense (Tomato); Solanum tuberosum (Potato); Solanum verrucosum; Solanum pennellii; Solanum stenotomum	156	0.9	18.5 kDa class I heat shock protein	17767	1117.67	8	18	48.0769	2.1314	45	8.7514	true	[BLASTED, MAPPED, ANNOTATED]	tr|A0A3Q7HZL2|A0A3Q7HZL2_SOLLC	SHSP domain-containing protein OS=Solanum lycopersicum OX=4081 PE=3 SV=1	156	20	3.45116e-107	91.51	8	P:GO:0006457; P:GO:0009408; P:GO:0009651; P:GO:0042542; P:GO:0051259; F:GO:0043621; F:GO:0051082; C:GO:0005737	P:protein folding; P:response to heat; P:response to salt stress; P:response to hydrogen peroxide; P:protein complex oligomerization; F:protein self-association; F:unfolded protein binding; C:cytoplasm
72	A0A3Q7HJ62_SOLLC	UniRef90_A0A3Q7HJ62	Cluster: Late embryogenesis abundant protein Lea14-A	UniProtKB Unreviewed (TrEMBL); UniParc	12	Solanum lycopersicum (Tomato); Solanum chacoense (Chaco potato); Capsicum annuum (Capsicum pepper); Solanum tuberosum (Potato); Capsicum chinense (Scotch bonnet); Solanum chilense (Tomato); Capsicum baccatum (Peruvian pepper); Solanum verrucosum; Solanum pennellii	348	0.9	desiccation protectant protein lea14-like protein	38633	1037.81	8	35	35.0575	1.0688	62	32.8471	true	[BLASTED, MAPPED, ANNOTATED]	tr|A0A3Q7HJ62|A0A3Q7HJ62_SOLLC	Uncharacterized protein OS=Solanum lycopersicum OX=4081 PE=3 SV=1	348	20	0	96.07	2	P:GO:0009269; C:GO:0005829	P:response to desiccation; C:cytosol
73	A0A3Q7INZ6_SOLLC	UniRef90_A0A3Q7INZ6	Cluster: Actin	UniProtKB Unreviewed (TrEMBL)	2	Solanum lycopersicum (Tomato); Lactuca sativa (Garden lettuce)	406	0.9	actin-7	45213	24756.7	7	39	20.4433	1.5275	89	11.6333	true	[BLASTED, MAPPED, ANNOTATED]	tr|A0A3Q7INZ6|A0A3Q7INZ6_SOLLC	Uncharacterized protein OS=Solanum lycopersicum OX=4081 PE=3 SV=1	406	20	0	97.88	6	P:GO:0051301; F:GO:0005524; C:GO:0005829; C:GO:0005856; C:GO:0005886; C:GO:0009506	P:cell division; F:ATP binding; C:cytosol; C:cytoskeleton; C:plasma membrane; C:plasmodesma
74	A0A3Q7JAX7_SOLLC	UniRef90_A0A3Q7JAX7	Cluster: V-type proton ATPase subunit E	UniProtKB Unreviewed (TrEMBL); UniParc	4	Solanum lycopersicum (Tomato); Solanum chilense (Tomato); Solanum pennellii; Solanum stenotomum	228	0.9	V-type proton ATPase subunit E-like	26053	9115.42	7	29	29.386	1.086	97	10.5028	true	[BLASTED, MAPPED, ANNOTATED]	tr|A0A3Q7JAX7|A0A3Q7JAX7_SOLLC	Uncharacterized protein OS=Solanum lycopersicum OX=4081 GN=101244849 PE=3 SV=1	228	20	4.77667e-163	93.46	4	P:GO:1902600; F:GO:0008553; F:GO:0046961; C:GO:0033178	P:proton transmembrane transport; F:P-type proton-exporting transporter activity; F:proton-transporting ATPase activity, rotational mechanism; C:proton-transporting two-sector ATPase complex, catalytic domain	EC:7.1.3.1; EC:7.1.2.1	H(+)-exporting diphosphatase; P-type H(+)-exporting transporter
75	A0A3Q7E8A8_SOLLC	UniRef90_A0A3Q7E8A8	Cluster: ML domain-containing protein	UniProtKB Unreviewed (TrEMBL); UniParc	3	Solanum lycopersicum (Tomato); Solanum chilense (Tomato); Solanum pennellii	159	0.9	putative phosphatidylglycerol/phosphatidylinositol transfer protein DDB_G0282179	17525	8754.17	7	14	54.0881	24.6544	69	20.3819	true	[BLASTED, MAPPED, ANNOTATED]	tr|A0A3Q7E8A8|A0A3Q7E8A8_SOLLC	ML domain-containing protein OS=Solanum lycopersicum OX=4081 GN=101249001 PE=4 SV=1	159	20	9.63136e-113	85.74	3	P:GO:0032366; F:GO:0032934; C:GO:0016021	P:intracellular sterol transport; F:sterol binding; C:integral component of membrane
76	A0A3Q7IA99_SOLLC	UniRef90_M1CCB0	Cluster: NAD(P)H dehydrogenase (quinone)	UniProtKB Unreviewed (TrEMBL); UniParc	20	Solanum tuberosum (Potato); Solanum chacoense (Chaco potato); Capsicum baccatum (Peruvian pepper); Capsicum chinense (Scotch bonnet); Capsicum annuum (Capsicum pepper); Solanum lycopersicum (Tomato); Solanum chilense (Tomato); Nicotiana tabacum (Common tobacco); Gossypium trilobum; Gossypium klotzschianum; Gossypium harknessii; Gossypium davidsonii (Davidson's cotton); Solanum stenotomum; Ipomoea…	203	0.9	probable NAD(P)H dehydrogenase (quinone) FQR1-like 1	21654	5326.4	7	14	50.2463	2.1535	64	18.8246	true	[BLASTED, MAPPED, ANNOTATED]	tr|A0A3Q7IA99|A0A3Q7IA99_SOLLC	NAD(P)H dehydrogenase (quinone) OS=Solanum lycopersicum OX=4081 GN=101245803 PE=3 SV=1	203	20	3.06354e-144	97.31	5	F:GO:0008753; F:GO:0010181; F:GO:0050136; C:GO:0005886; C:GO:0009506	F:NADPH dehydrogenase (quinone) activity; F:FMN binding; F:NADH dehydrogenase (quinone) activity; C:plasma membrane; C:plasmodesma	EC:1.6.5.10; EC:1.6.5.11; EC:1.6.5.2	NADPH dehydrogenase (quinone); NADH dehydrogenase (quinone); NAD(P)H dehydrogenase (quinone)
77	A0A3Q7FTL7_SOLLC	UniRef90_A0A3Q7FTL7	Cluster: Polygalacturonase	UniProtKB Unreviewed (TrEMBL)	1	Solanum lycopersicum (Tomato)	540	0.9	probable polygalacturonase At3g15720	57987	4108.26	7	32	23.5185	32.8965	96	34.0302	true	[BLASTED, MAPPED, ANNOTATED]	tr|A0A3Q7FTL7|A0A3Q7FTL7_SOLLC	Uncharacterized protein OS=Solanum lycopersicum OX=4081 PE=3 SV=1	540	20	0	83.01	4	P:GO:0005975; F:GO:0004650; C:GO:0005618; C:GO:0016021	P:carbohydrate metabolic process; F:polygalacturonase activity; C:cell wall; C:integral component of membrane	EC:3.2.1.15	Endo-polygalacturonase
78	A0A3Q7EB31_SOLLC	UniRef90_A0A3Q7EB31	Cluster: Ricin B-type lectin domain-containing protein	UniProtKB Unreviewed (TrEMBL); UniParc	7	Solanum lycopersicum (Tomato); Solanum tuberosum (Potato); Solanum pennellii; Solanum verrucosum; Solanum stenotomum	333	0.9	Hop-interacting protein THI113	38227	4099.41	7	29	36.9369	1.1438	94	21.9688	true	[BLASTED, MAPPED, ANNOTATED]	tr|A0A3Q7EB31|A0A3Q7EB31_SOLLC	Uncharacterized protein OS=Solanum lycopersicum OX=4081 PE=4 SV=1	333	20	0	84.78	1	F:GO:0030246	F:carbohydrate binding
79	A0A3Q7G391_SOLLC	UniRef90_A0A022Q7A1	Cluster: Ras-related protein RABC1-like	UniProtKB Unreviewed (TrEMBL); UniParc	38	Erythranthe guttata (Yellow monkey flower); Solanum chacoense (Chaco potato); Coffea arabica (Arabian coffee); Coffea canephora (Robusta coffee); Rhodamnia argentea; Fagus sylvatica (Beechnut); Genlisea aurea; Handroanthus impetiginosus; Hevea brasiliensis (Para rubber tree); Sesamum indicum (Oriental sesame); Anthurium amnicola; Rhamnella rubrinervis; Manihot esculenta (Cassava); Solanum tuberos…	210	0.9	ras-related protein RABC1	23253	3847.41	7	26	41.6268	5.5209	59	31.1755	true	[BLASTED, MAPPED, ANNOTATED]	tr|A0A3Q7G391|A0A3Q7G391_SOLLC	Uncharacterized protein OS=Solanum lycopersicum OX=4081 GN=101257258 PE=4 SV=1	209	20	2.43026e-151	98.18	4	P:GO:0006886; F:GO:0003925; F:GO:0005525; C:GO:0005794	P:intracellular protein transport; F:G protein activity; F:GTP binding; C:Golgi apparatus	EC:3.6.1; EC:3.6.5.1; EC:3.6.5.2	Acting on acid anhydrides; Heterotrimeric G-protein GTPase; Small monomeric GTPase
80	A0A3Q7IMP4_SOLLC	UniRef90_A0A3Q7IMP4	Cluster: SOUL heme-binding family protein	UniProtKB Unreviewed (TrEMBL); UniParc	9	Solanum lycopersicum (Tomato); Solanum chilense (Tomato); Solanum chacoense (Chaco potato); Solanum tuberosum (Potato); Nicotiana tabacum (Common tobacco); Nicotiana sylvestris (Wood tobacco); Solanum verrucosum; Solanum pennellii; Solanum stenotomum	199	0.9	heme-binding-like protein At3g10130, chloroplastic	22195	3320.52	7	20	38.191	30.0622	66	18.3535	true	[BLASTED]	tr|A0A3Q7IMP4|A0A3Q7IMP4_SOLLC	Uncharacterized protein OS=Solanum lycopersicum OX=4081 GN=101251239 PE=3 SV=1	199	20	1.64822e-141	92.53
81	14339_SOLLC	UniRef90_P93214	Cluster: 14-3-3 protein 9	UniProtKB Reviewed (Swiss-Prot); UniProtKB Unreviewed (TrEMBL); UniParc	15	Solanum lycopersicum (Tomato); Capsicum annuum (Capsicum pepper); Nicotiana tabacum (Common tobacco); Nicotiana attenuata (Coyote tobacco); Nicotiana sylvestris (Wood tobacco); Solanum tuberosum (Potato); Solanum chilense (Tomato); Solanum chacoense (Chaco potato); Capsicum chinense (Scotch bonnet); Capsicum baccatum (Peruvian pepper); Solanum pennellii; Solanum verrucosum	261	0.9	14-3-3 protein 9	29413	3270.8	7	31	34.4828	11.6238	51	30.9932	true	[BLASTED]	sp|P93214|14339_SOLLC	14-3-3 protein 9 OS=Solanum lycopersicum OX=4081 GN=TFT9 PE=2 SV=2	261	20	0	97.38
82	A0A3Q7HPM9_SOLLC	UniRef90_A0A3Q7HPM9	Cluster: 30S ribosomal protein S3, chloroplastic	UniProtKB Unreviewed (TrEMBL); UniParc	10	Solanum lycopersicum (Tomato); Capsicum baccatum (Peruvian pepper); Capsicum annuum (Capsicum pepper); Solanum chilense (Tomato); Solanum chacoense (Chaco potato); Solanum tuberosum (Potato); Solanum verrucosum	238	0.9	40S ribosomal protein S3-3-like	26473	2272.88	7	29	35.7143	29.2394	51	24.0307	true	[BLASTED, MAPPED, ANNOTATED]	tr|A0A3Q7HPM9|A0A3Q7HPM9_SOLLC	30S ribosomal protein S3_ chloroplastic OS=Solanum lycopersicum OX=4081 GN=101244892 PE=3 SV=1	238	20	2.29272e-172	97.29	5	P:GO:0006412; F:GO:0003735; F:GO:0019843; C:GO:0005634; C:GO:0022627	P:translation; F:structural constituent of ribosome; F:rRNA binding; C:nucleus; C:cytosolic small ribosomal subunit
83	A0A3Q7HGJ9_SOLLC	UniRef90_A0A3Q7HGJ9	Cluster: Phosphoglycerate kinase	UniProtKB Unreviewed (TrEMBL); UniParc	8	Solanum lycopersicum (Tomato); Solanum chilense (Tomato); Solanum habrochaites (Wild tomato); [Lycopersicon] peruvianum var. humifusum; Solanum pimpinellifolium (Currant tomato); Solanum peruvianum (Peruvian tomato)	883	0.9	Phosphoglycerate kinase, chloroplastic	92665	822.303	7	76	12.0045	23.1235	73	23.8478	true	[BLASTED, MAPPED, ANNOTATED]	tr|A0A3Q7HGJ9|A0A3Q7HGJ9_SOLLC	Phosphoglycerate kinase OS=Solanum lycopersicum OX=4081 PE=3 SV=1	883	20	0	94.21	3	P:GO:0006096; F:GO:0004618; F:GO:0005524	P:glycolytic process; F:phosphoglycerate kinase activity; F:ATP binding	EC:2.7.2.3	Phosphoglycerate kinase
84	A0A3Q7HMP2_SOLLC	UniRef90_Q40465	Cluster: Eukaryotic initiation factor 4A-11	UniProtKB Reviewed (Swiss-Prot); UniProtKB Unreviewed (TrEMBL); UniParc	43	Nicotiana tabacum (Common tobacco); Nicotiana plumbaginifolia (Leadwort-leaved tobacco); Capsicum annuum (Capsicum pepper); Capsicum baccatum (Peruvian pepper); Nicotiana attenuata (Coyote tobacco); Solanum tuberosum (Potato); Capsicum chinense (Scotch bonnet); Nicotiana sylvestris (Wood tobacco); Nicotiana benthamiana; Solanum lycopersicum (Tomato); Solanum chilense (Tomato); Solanum chacoense (…	413	0.9	eukaryotic initiation factor 4A-2	46858	738.798	7	42	24.6973	0.4329	48	22.4097	true	[BLASTED, MAPPED, ANNOTATED]	tr|A0A3Q7HMP2|A0A3Q7HMP2_SOLLC	Uncharacterized protein OS=Solanum lycopersicum OX=4081 GN=101252510 PE=3 SV=1	413	20	0	99.67	8	P:GO:0002183; F:GO:0003724; F:GO:0003729; F:GO:0003743; F:GO:0005524; F:GO:0016787; C:GO:0005730; C:GO:0071013	P:cytoplasmic translational initiation; F:RNA helicase activity; F:mRNA binding; F:translation initiation factor activity; F:ATP binding; F:hydrolase activity; C:nucleolus; C:catalytic step 2 spliceosome	EC:3.6.4.13	RNA helicase
85	A0A3Q7H4E3_SOLLC	UniRef90_A0A3Q7FQU3	Cluster: Clp R domain-containing protein	UniProtKB Unreviewed (TrEMBL); UniParc	26	Solanum lycopersicum (Tomato); Solanum tuberosum (Potato); Solanum phureja; Nicotiana tabacum (Common tobacco); Nicotiana sylvestris (Wood tobacco); Capsicum annuum (Capsicum pepper); Nicotiana attenuata (Coyote tobacco); Capsicum chinense (Scotch bonnet); Solanum chilense (Tomato); Capsicum baccatum (Peruvian pepper); Solanum chacoense (Chaco potato); Solanum verrucosum; Solanum stenotomum; Sola…	911	0.9	chaperone protein ClpB1	94882	417.114	7	83	10.6682	16.8511	74	30.1958	true	[BLASTED, MAPPED, ANNOTATED]	tr|A0A3Q7H4E3|A0A3Q7H4E3_SOLLC	Clp R domain-containing protein OS=Solanum lycopersicum OX=4081 PE=3 SV=1	853	20	0	94.07	3	P:GO:0034605; F:GO:0005524; C:GO:0005737	P:cellular response to heat; F:ATP binding; C:cytoplasm
86	A0A3Q7FZ65_SOLLC	UniRef90_A0A3Q7FZ65	Cluster: Bet_v_1 domain-containing protein	UniProtKB Unreviewed (TrEMBL); UniParc	3	Solanum lycopersicum (Tomato); Solanum chilense (Tomato); Solanum pennellii	147	0.9	MLP-like protein 34	16584	9836.11	6	10	58.5034	0.812	118	17.3283	true	[BLASTED, MAPPED, ANNOTATED]	tr|A0A3Q7FZ65|A0A3Q7FZ65_SOLLC	Bet_v_1 domain-containing protein OS=Solanum lycopersicum OX=4081 GN=101264312 PE=4 SV=1	147	20	1.12971e-101	84.2	1	P:GO:0006952	P:defense response
87	K4DFV3_SOLLC	UniRef90_Q08451	Cluster: Probable aquaporin PIP-type pTOM75	UniProtKB Reviewed (Swiss-Prot); UniProtKB Unreviewed (TrEMBL); UniParc	62	Solanum lycopersicum (Tomato); Solanum chilense (Tomato); Solanum chacoense (Chaco potato); Nicotiana sylvestris (Wood tobacco); Nicotiana tabacum (Common tobacco); Solanum tuberosum (Potato); Nicotiana tomentosiformis (Tobacco); Capsicum baccatum (Peruvian pepper); Capsicum chinense (Scotch bonnet); Capsicum annuum (Capsicum pepper); Nicotiana attenuata (Coyote tobacco); Nicotiana excelsior; Lyc…	286	0.9	probable aquaporin PIP-type pTOM75	30801	9001.65	6	24	17.3611	0.6945	87	16.5853	true	[BLASTED, MAPPED, ANNOTATED]	tr|K4DFV3|K4DFV3_SOLLC	Plasmamembrane intrinsic protein 13 OS=Solanum lycopersicum OX=4081 GN=101264708 PE=2 SV=1	288	20	0	98.93	8	P:GO:0006833; P:GO:0009414; P:GO:0055085; F:GO:0015250; C:GO:0005773; C:GO:0005886; C:GO:0009506; C:GO:0016021	P:water transport; P:response to water deprivation; P:transmembrane transport; F:water channel activity; C:vacuole; C:plasma membrane; C:plasmodesma; C:integral component of membrane	EC:7	Translocases
88	V5YN09_SOLLC	UniRef90_A0A2G2WJ28	Cluster: Plasma membrane intrinsic protein 2	UniProtKB Unreviewed (TrEMBL); UniParc	42	Capsicum baccatum (Peruvian pepper); Solanum tuberosum (Potato); Capsicum chinense (Scotch bonnet); Nicotiana tomentosiformis (Tobacco); Capsicum annuum (Capsicum pepper); Nicotiana sylvestris (Wood tobacco); Nicotiana tabacum (Common tobacco); Nicotiana glauca (Glaucous tobacco); Solanum lycopersicum (Tomato); Solanum chilense (Tomato); Nicotiana attenuata (Coyote tobacco); Lycium barbarum (Barb…	287	0.9	aquaporin PIP2-4-like	30638	8109.48	6	19	26.8293	11.1489	78	22.3659	true	[BLASTED, MAPPED, ANNOTATED]	tr|V5YN09|V5YN09_SOLLC	Plasmamembrane intrinsic protein 26 OS=Solanum lycopersicum OX=4081 GN=PIP2;6 PE=2 SV=1	287	20	0	95.75	5	P:GO:0006833; P:GO:0055085; F:GO:0015250; C:GO:0005886; C:GO:0016021	P:water transport; P:transmembrane transport; F:water channel activity; C:plasma membrane; C:integral component of membrane	EC:7	Translocases
89	Q38JE1_SOLLC	UniRef90_A0A1U8FD13	Cluster: Lipocln_cytosolic_FA-bd_dom domain-containing protein	UniProtKB Unreviewed (TrEMBL); UniParc	11	Capsicum annuum (Capsicum pepper); Solanum tuberosum (Potato); Solanum lycopersicum (Tomato); Solanum chilense (Tomato); Capsicum baccatum (Peruvian pepper); Solanum chacoense (Chaco potato); Solanum pennellii; Solanum verrucosum	185	0.9	temperature-induced lipocalin-1	21245	3943.11	6	18	41.6216	0.3135	80	20.8873	true	[BLASTED, MAPPED, ANNOTATED]	tr|Q38JE1|Q38JE1_SOLLC	Temperature-induced lipocalin OS=Solanum lycopersicum OX=4081 GN=TIL' PE=2 SV=1	185	20	2.57383e-133	95.71	3	P:GO:0000302; P:GO:0006629; C:GO:0005737	P:response to reactive oxygen species; P:lipid metabolic process; C:cytoplasm
90	A0A3Q7G8G7_SOLLC	UniRef90_A0A3Q7G8G7	Cluster: 14_3_3 domain-containing protein	UniProtKB Unreviewed (TrEMBL); UniParc	7	Solanum lycopersicum (Tomato); Solanum chilense (Tomato); Nicotiana tabacum (Common tobacco); Nicotiana sylvestris (Wood tobacco); Nicotiana tomentosiformis	243	0.9	14-3-3 protein 7	27740	2837.09	6	26	37.4486	12.5546	46	34.2677	true	[BLASTED]	tr|A0A3Q7G8G7|A0A3Q7G8G7_SOLLC	14_3_3 domain-containing protein OS=Solanum lycopersicum OX=4081 PE=3 SV=1	243	20	1.19213e-165	98.65
91	A0A6F8PJG0_SOLLC	UniRef90_A0A3Q7FJI3	Cluster: Fe2OG dioxygenase domain-containing protein	UniProtKB Unreviewed (TrEMBL); UniParc	7	Solanum lycopersicum (Tomato); Solanum lycopersicum var. cerasiforme; Solanum chilense (Tomato); Solanum pennellii	321	0.9	probable 2-oxoglutarate-dependent dioxygenase AOP1	36497	2167.96	6	26	29.595	15.7004	57	32.9681	true	[BLASTED, MAPPED, ANNOTATED]	tr|A0A6F8PJG0|A0A6F8PJG0_SOLLC	Alpha-tomatine 23-hydroxylase OS=Solanum lycopersicum OX=4081 GN=23DOX PE=2 SV=1	321	20	0	89.92	3	F:GO:0031418; F:GO:0046872; F:GO:0051213	F:L-ascorbic acid binding; F:metal ion binding; F:dioxygenase activity	EC:1	Oxidoreductases
92	A0A3Q7G727_SOLLC	UniRef90_M1CBH0	Cluster: Alcohol dehydrogenase 1	UniProtKB Unreviewed (TrEMBL); UniParc	10	Solanum tuberosum (Potato); Capsicum chinense (Scotch bonnet); Capsicum annuum (Capsicum pepper); Solanum chilense (Tomato); Capsicum baccatum (Peruvian pepper); Solanum lycopersicum (Tomato); Solanum pennellii; Solanum verrucosum	379	0.9	alcohol dehydrogenase 1	41124	1819.63	6	29	10.5541	43.3748	50	30.408	true	[BLASTED, MAPPED, ANNOTATED]	tr|A0A3Q7G727|A0A3Q7G727_SOLLC	Uncharacterized protein OS=Solanum lycopersicum OX=4081 GN=101261114 PE=3 SV=1	379	20	0	97.41	5	P:GO:0046294; F:GO:0004024; F:GO:0008270; F:GO:0051903; C:GO:0005829	P:formaldehyde catabolic process; F:alcohol dehydrogenase activity, zinc-dependent; F:zinc ion binding; F:S-(hydroxymethyl)glutathione dehydrogenase activity; C:cytosol	EC:1.1.1.284; EC:1.1.1.1; EC:1.1.1.71	S-(hydroxymethyl)glutathione dehydrogenase; Alcohol dehydrogenase; Alcohol dehydrogenase (NAD(P)(+))
93	A0A3Q7E9G4_SOLLC	UniRef90_A0A3Q7E9G4	Cluster: Poly [ADP-ribose] polymerase	UniProtKB Unreviewed (TrEMBL)	1	Solanum lycopersicum (Tomato)	1174	0.9	poly [ADP-ribose] polymerase 3-like	132407	1811.13	6	123	7.4957	8.9093	63	45.7307	true	[BLASTED, MAPPED, ANNOTATED]	tr|A0A3Q7E9G4|A0A3Q7E9G4_SOLLC	Poly [ADP-ribose] polymerase OS=Solanum lycopersicum OX=4081 PE=3 SV=1	1174	20	0	91.32	5	P:GO:0006302; P:GO:0070212; F:GO:0003950; F:GO:1990404; C:GO:0005730	P:double-strand break repair; P:protein poly-ADP-ribosylation; F:NAD+ ADP-ribosyltransferase activity; F:protein ADP-ribosylase activity; C:nucleolus	EC:2.4.2.30	NAD(+) ADP-ribosyltransferase
94	A0A3Q7I245_SOLLC	UniRef90_A0A3Q7I245	Cluster: EF1_GNE domain-containing protein	UniProtKB Unreviewed (TrEMBL); UniParc	28	Solanum lycopersicum (Tomato); Solanum chilense (Tomato); Nicotiana sylvestris (Wood tobacco); Solanum tuberosum (Potato); Solanum chacoense (Chaco potato); Capsicum annuum (Capsicum pepper); Capsicum chinense (Scotch bonnet); Solanum pennellii; Solanum stenotomum; Solanum verrucosum; Nicotiana attenuata	232	0.9	elongation factor 1-delta 1-like	25252	1476.38	6	19	40.9483	3.2283	45	31.6739	true	[BLASTED, MAPPED, ANNOTATED]	tr|A0A3Q7I245|A0A3Q7I245_SOLLC	EF1_GNE domain-containing protein OS=Solanum lycopersicum OX=4081 PE=3 SV=1	232	20	8.51667e-166	97.87	6	P:GO:0006414; P:GO:0050790; F:GO:0003746; F:GO:0005085; C:GO:0005829; C:GO:0005853	P:translational elongation; P:regulation of catalytic activity; F:translation elongation factor activity; F:guanyl-nucleotide exchange factor activity; C:cytosol; C:eukaryotic translation elongation factor 1 complex
95	PME1_SOLLC	UniRef90_P14280	Cluster: Pectinesterase 1	UniProtKB Reviewed (Swiss-Prot); UniProtKB Unreviewed (TrEMBL); UniParc	6	Solanum lycopersicum (Tomato); Solanum chilense (Tomato); Solanum pennellii	546	0.9	pectinesterase 2.1	60027	1159.02	6	46	18.8645	29.4475	81	29.5253	true	[BLASTED, MAPPED, ANNOTATED]	sp|P14280|PME1_SOLLC	Pectinesterase 1 OS=Solanum lycopersicum OX=4081 GN=PME1.9 PE=1 SV=5	546	20	0	91.13	10	P:GO:0009835; P:GO:0042545; P:GO:0043086; P:GO:0045490; F:GO:0030599; F:GO:0045330; F:GO:0046910; C:GO:0005576; C:GO:0005618; C:GO:0016021	P:fruit ripening; P:cell wall modification; P:negative regulation of catalytic activity; P:pectin catabolic process; F:pectinesterase activity; F:aspartyl esterase activity; F:pectinesterase inhibitor activity; C:extracellular region; C:cell wall; C:integral component of membrane	EC:3.1.1.11	Pectinesterase
96	O81536_SOLLC	UniRef90_O24132	Cluster: Annexin	UniProtKB Unreviewed (TrEMBL); UniParc	22	Nicotiana tabacum (Common tobacco); Nicotiana sylvestris (Wood tobacco); Solanum tuberosum (Potato); Capsicum annuum (Capsicum pepper); Solanum chilense (Tomato); Solanum lycopersicum (Tomato); Solanum chacoense (Chaco potato); Capsicum chinense (Scotch bonnet); Nicotiana attenuata (Coyote tobacco); Capsicum baccatum (Peruvian pepper); Kribbella monticola; Nicotiana tomentosiformis; Solanum verru…	314	0.9	annexin D1-like	35779	1019.14	6	41	22.293	6.7796	43	30.6837	true	[BLASTED, MAPPED, ANNOTATED]	tr|O81536|O81536_SOLLC	Annexin OS=Solanum lycopersicum OX=4081 GN=AN34 PE=2 SV=1	314	20	0	96.89	3	F:GO:0005509; F:GO:0005544; C:GO:0005737	F:calcium ion binding; F:calcium-dependent phospholipid binding; C:cytoplasm
97	A0A3Q7I2C5_SOLLC	UniRef90_A0A3Q7I2C5	Cluster: Enoyl reductase (ER) domain-containing protein	UniProtKB Unreviewed (TrEMBL); UniParc	9	Solanum lycopersicum (Tomato); Solanum tuberosum (Potato); Solanum chilense (Tomato); Solanum stenotomum; Solanum pennellii; Solanum verrucosum	378	0.9	chloroplast envelope quinone oxidoreductase homolog	40005	908.052	6	29	23.8095	0.9635	41	22.4781	true	[BLASTED, MAPPED, ANNOTATED]	tr|A0A3Q7I2C5|A0A3Q7I2C5_SOLLC	PKS_ER domain-containing protein OS=Solanum lycopersicum OX=4081 PE=4 SV=1	378	20	0	82.57	1	F:GO:0016491	F:oxidoreductase activity	EC:1	Oxidoreductases
98	A0A3Q7FRW6_SOLLC	UniRef90_A0A3Q7FRW6	Cluster: PHB domain-containing protein	UniProtKB Unreviewed (TrEMBL); UniParc	11	Solanum lycopersicum (Tomato); Solanum tuberosum (Potato); Solanum chilense (Tomato); Pyrus ussuriensis x Pyrus communis; Abrus precatorius (Indian licorice); Nicotiana tabacum (Common tobacco); Solanum chacoense (Chaco potato); Solanum verrucosum; Solanum pennellii; Pyrus x bretschneideri	285	0.9	hypersensitive-induced reaction 1 protein	31329	837.178	6	34	24.9123	0.7018	51	32.2152	true	[BLASTED, MAPPED]	tr|A0A3Q7FRW6|A0A3Q7FRW6_SOLLC	PHB domain-containing protein OS=Solanum lycopersicum OX=4081 GN=101245344 PE=4 SV=1	285	20	0	99.01	261	P:GO:0000160; P:GO:0000165; P:GO:0000226; P:GO:0001578; P:GO:0001654; P:GO:0001934; P:GO:0002385; P:GO:0003384; P:GO:0006231; P:GO:0006260; P:GO:0006269; P:GO:0006281; P:GO:0006325; P:GO:0006351; P:GO:0006355; P:GO:0006357; P:GO:0006396; P:GO:0006468; P:GO:0006508; P:GO:0006520; P:GO:0006629; P:GO:0006744; P:GO:0006974; P:GO:0006979; P:GO:0007017; P:GO:0007026; P:GO:0007165; P:GO:0007250; P:GO:00…	P:phosphorelay signal transduction system; P:MAPK cascade; P:microtubule cytoskeleton organization; P:microtubule bundle formation; P:eye development; P:positive regulation of protein phosphorylation; P:mucosal immune response; P:apical constriction involved in gastrulation; P:dTMP biosynthetic process; P:DNA replication; P:DNA replication, synthesis of RNA primer; P:DNA repair; P:chromatin organ…
99	A0A3Q7J1U2_SOLLC	UniRef90_A0A3Q7J1U2	Cluster: Vicilin-like seed storage protein At2g18540	UniProtKB Unreviewed (TrEMBL); UniParc	7	Solanum lycopersicum (Tomato); Solanum demissum (Wild potato); Solanum chilense (Tomato); Solanum tuberosum (Potato); Solanum pennellii; Solanum verrucosum; Solanum stenotomum	511	0.9	vicilin-like seed storage protein At2g28490	57117	620.982	6	44	14.09	11.5526	50	29.2457	true	[BLASTED]	tr|A0A3Q7J1U2|A0A3Q7J1U2_SOLLC	Uncharacterized protein OS=Solanum lycopersicum OX=4081 GN=101246214 PE=4 SV=1	511	20	0	88.78
100	A0A3Q7F1W7_SOLLC	UniRef90_A0A3Q7F1W7	Cluster: 40S ribosomal protein S4	UniProtKB Unreviewed (TrEMBL)	1	Solanum lycopersicum (Tomato)	1200	0.9	40S ribosomal protein S4	136600	586.245	6	113	4.9167	3.6892	36	28.9166	true	[BLASTED, MAPPED, ANNOTATED]	tr|A0A3Q7F1W7|A0A3Q7F1W7_SOLLC	Uncharacterized protein OS=Solanum lycopersicum OX=4081 PE=3 SV=1	1200	20	0	97.98	5	P:GO:0006412; F:GO:0003735; F:GO:0019843; C:GO:0016021; C:GO:0022627	P:translation; F:structural constituent of ribosome; F:rRNA binding; C:integral component of membrane; C:cytosolic small ribosomal subunit
101	A0A3Q7IJU2_SOLLC	UniRef90_A0A3Q7IJU2	Cluster: pyruvate decarboxylase	UniProtKB Unreviewed (TrEMBL); UniParc	15	Solanum lycopersicum (Tomato); Capsicum baccatum (Peruvian pepper); Solanum chilense (Tomato); Capsicum chinense (Scotch bonnet); Nicotiana tabacum (Common tobacco); Nicotiana attenuata (Coyote tobacco); Nicotiana sylvestris (Wood tobacco); Capsicum annuum (Capsicum pepper); Solanum stenotomum; Solanum verrucosum; Nicotiana tomentosiformis; Solanum tuberosum	603	0.9	pyruvate decarboxylase 1-like	65296	423.012	6	41	12.6036	1.4557	47	24.856	true	[BLASTED, MAPPED, ANNOTATED]	tr|A0A3Q7IJU2|A0A3Q7IJU2_SOLLC	Pyruvate decarboxylase OS=Solanum lycopersicum OX=4081 GN=101247173 PE=3 SV=1	603	20	0	96.42	4	F:GO:0000287; F:GO:0004737; F:GO:0030976; C:GO:0005829	F:magnesium ion binding; F:pyruvate decarboxylase activity; F:thiamine pyrophosphate binding; C:cytosol	EC:4.1.1.1	Pyruvate decarboxylase
102	A0A3Q7IBA0_SOLLC	UniRef90_Q8H159	Cluster: Polyubiquitin 10	UniProtKB Reviewed (Swiss-Prot); UniProtKB Unreviewed (TrEMBL); UniParc	56	Arabidopsis thaliana (Mouse-ear cress); Nicotiana sylvestris (Wood tobacco); Prunus persica (Peach); Pisum sativum (Garden pea); Arachis duranensis (Wild peanut); Prunus armeniaca (Apricot); Arachis hypogaea (Peanut); Glycine soja (Wild soybean); Citrus clementina (Clementine); Citrus sinensis (Sweet orange); Gossypium raimondii (New World cotton); Arabidopsis thaliana x Arabidopsis arenosa; Viti…	457	0.9	polyubiquitin-like isoform X1	51174	38655.4	5	54	10.0656	1.2379	69	6.402	true	[BLASTED, MAPPED, ANNOTATED]	tr|A0A3Q7IBA0|A0A3Q7IBA0_SOLLC	Uncharacterized protein OS=Solanum lycopersicum OX=4081 GN=101256039 PE=4 SV=1	457	20	0	99.98	19	P:GO:0006281; P:GO:0006468; P:GO:0016567; P:GO:0019941; P:GO:0090305; F:GO:0004527; F:GO:0004674; F:GO:0005524; F:GO:0008081; F:GO:0016616; F:GO:0031386; F:GO:0031625; F:GO:0051287; F:GO:0106310; C:GO:0000781; C:GO:0005634; C:GO:0005737; C:GO:0005840; C:GO:0016021	P:DNA repair; P:protein phosphorylation; P:protein ubiquitination; P:modification-dependent protein catabolic process; P:nucleic acid phosphodiester bond hydrolysis; F:exonuclease activity; F:protein serine/threonine kinase activity; F:ATP binding; F:phosphoric diester hydrolase activity; F:oxidoreductase activity, acting on the CH-OH group of donors, NAD or NADP as acceptor; F:protein tag; F:ubi…	EC:3.1.4; EC:2.7.11.1; EC:1.1.1	Acting on ester bonds; Non-specific serine/threonine protein kinase; Acting on the CH-OH group of donors
103	O82575_SOLLC	UniRef90_Q9ZRB6	Cluster: Ci21A protein	UniProtKB Unreviewed (TrEMBL); UniParc	35	Solanum tuberosum (Potato); Capsicum baccatum (Peruvian pepper); Capsicum chinense (Scotch bonnet); Capsicum annuum (Capsicum pepper); Solanum peruvianum (Peruvian tomato); Solanum cheesmaniae (Galapagos Island tomato); Solanum chilense (Tomato); Solanum lycopersicum (Tomato); Solanum habrochaites (Wild tomato); [Lycopersicon] peruvianum var. humifusum; Solanum lycopersicum var. cerasiforme; Sola…	109	0.9	ASR1 protein	12547	18394.3	5	11	51.8182	1.1021	94	10.9148	true	[BLASTED, MAPPED, ANNOTATED]	tr|O82575|O82575_SOLLC	Fruit-ripening protein OS=Solanum lycopersicum OX=4081 GN=543574 PE=2 SV=1	110	20	1.48813e-63	98.37	6	P:GO:0009414; P:GO:0010043; F:GO:0008270; F:GO:0042802; C:GO:0005634; C:GO:0032991	P:response to water deprivation; P:response to zinc ion; F:zinc ion binding; F:identical protein binding; C:nucleus; C:protein-containing complex
104	A0A3Q7HSM7_SOLLC	UniRef90_A0A3Q7HSM7	Cluster: GTP-binding protein YPTM2-like	UniProtKB Unreviewed (TrEMBL); UniParc	63	Solanum lycopersicum (Tomato); Solanum chilense (Tomato); Aegilops tauschii subsp. strangulata (Goatgrass); Nicotiana attenuata (Coyote tobacco); Capsicum annuum (Capsicum pepper); Arachis duranensis (Wild peanut); Gossypium mustelinum (Cotton); Gossypium tomentosum (Hawaiian cotton); Gossypium hirsutum (Upland cotton); Gossypium barbadense (Sea-island cotton); Gossypium australe; Gossypium darwi…	203	0.9	GTP-binding protein YPTM2	22489	6085.4	5	18	27.0936	0.951	45	17.2336	true	[BLASTED, MAPPED, ANNOTATED]	tr|A0A3Q7HSM7|A0A3Q7HSM7_SOLLC	Uncharacterized protein OS=Solanum lycopersicum OX=4081 GN=544010 PE=4 SV=1	203	20	4.64713e-150	99.33	2	F:GO:0003924; F:GO:0005525	F:GTPase activity; F:GTP binding	EC:3.6.1	Acting on acid anhydrides
105	Q41339_SOLLC	UniRef90_A0A7J6DSJ1	Cluster: Ras-related protein RABD1-like	UniProtKB Unreviewed (TrEMBL); UniParc	28	Cannabis sativa (Hemp); Capsicum chinense (Scotch bonnet); Solanum lycopersicum (Tomato); Solanum chacoense (Chaco potato); Solanum chilense (Tomato); Solanum tuberosum (Potato); Nicotiana tabacum (Common tobacco); Nicotiana sylvestris (Wood tobacco); Nicotiana attenuata (Coyote tobacco); Petunia hybrida (Petunia); Capsicum annuum (Capsicum pepper); Gossypium raimondii (New World cotton); Gossypi…	201	0.9	ras-related protein RABD1	22489	3183.75	5	22	26.7327	8.2587	34	17.6189	true	[BLASTED, MAPPED, ANNOTATED]	tr|Q41339|Q41339_SOLLC	Small GTP-binding protein OS=Solanum lycopersicum OX=4081 GN=LeRab1B PE=2 SV=1	202	20	1.59451e-147	97.45	7	P:GO:0006886; P:GO:0032259; P:GO:0045492; F:GO:0003924; F:GO:0005525; F:GO:0008168; C:GO:0000139	P:intracellular protein transport; P:methylation; P:xylan biosynthetic process; F:GTPase activity; F:GTP binding; F:methyltransferase activity; C:Golgi membrane	EC:3.6.1; EC:2.1.1	Acting on acid anhydrides; Transferring one-carbon groups
106	A0A3Q7EJA4_SOLLC	UniRef90_W1P062	Cluster: Ras-related protein RABH1b	UniProtKB Unreviewed (TrEMBL); UniParc	182	Amborella trichopoda; Colocasia esculenta (Wild taro); Cynara cardunculus var. scolymus (Globe artichoke); Genlisea aurea; Ananas comosus (Pineapple); Oryza brachyantha (malo sina); Durio zibethinus (Durian); Cannabis sativa (Hemp); Artemisia annua (Sweet wormwood); Sesamum indicum (Oriental sesame); Theobroma cacao (Cacao); Herrania umbratica; Ensete ventricosum (Abyssinian banana); Musa acumina…	208	0.9	ras-related protein RABH1b	23083	2754.05	5	23	26.9231	11.3175	47	27.5929	true	[BLASTED, MAPPED, ANNOTATED]	tr|A0A3Q7EJA4|A0A3Q7EJA4_SOLLC	Uncharacterized protein OS=Solanum lycopersicum OX=4081 GN=101245584 PE=4 SV=1	208	20	3.64679e-151	99.21	8	P:GO:0006886; P:GO:0006890; P:GO:0006891; P:GO:0042147; F:GO:0003924; F:GO:0005525; C:GO:0005794; C:GO:0005829	P:intracellular protein transport; P:retrograde vesicle-mediated transport, Golgi to endoplasmic reticulum; P:intra-Golgi vesicle-mediated transport; P:retrograde transport, endosome to Golgi; F:GTPase activity; F:GTP binding; C:Golgi apparatus; C:cytosol	EC:3.6.1	Acting on acid anhydrides
107	A0A3Q7ELA6_SOLLC	UniRef90_A0A6N2BBX6	Cluster: Fasciclin-like arabinogalactan protein 8	UniProtKB Unreviewed (TrEMBL); UniParc	4	Solanum chilense (Tomato); Solanum lycopersicum (Tomato); Solanum pennellii	414	0.9	Fasciclin-like arabinogalactan protein 8	37209	2419.71	5	22	25.9887	1.0464	61	19.9749	true	[BLASTED, MAPPED, ANNOTATED]	tr|A0A3Q7ELA6|A0A3Q7ELA6_SOLLC	Uncharacterized protein OS=Solanum lycopersicum OX=4081 PE=3 SV=1	354	20	0	82.25	2	C:GO:0016021; C:GO:0046658	C:integral component of membrane; C:anchored component of plasma membrane
108	A0A3Q7J501_SOLLC	UniRef90_Q40521	Cluster: Ras-related protein Rab11B	UniProtKB Reviewed (Swiss-Prot); UniProtKB Unreviewed (TrEMBL); UniParc	10	Nicotiana tabacum (Common tobacco); Capsicum annuum (Capsicum pepper); Capsicum chinense (Scotch bonnet); Solanum lycopersicum (Tomato); Solanum chacoense (Chaco potato); Solanum tuberosum (Potato); Trifolium pratense (Red clover); Trifolium medium; Hevea brasiliensis	217	0.9	ras-related protein Rab11B	24275	1917.09	5	23	22.5806	11.9536	35	21.7793	true	[BLASTED, MAPPED, ANNOTATED]	tr|A0A3Q7J501|A0A3Q7J501_SOLLC	Uncharacterized protein OS=Solanum lycopersicum OX=4081 GN=101256455 PE=4 SV=1	217	20	7.28331e-158	98.29	4	F:GO:0003924; F:GO:0005525; C:GO:0005768; C:GO:0005886	F:GTPase activity; F:GTP binding; C:endosome; C:plasma membrane	EC:3.6.1	Acting on acid anhydrides
109	A0A3Q7EN25_SOLLC	UniRef90_A0A3Q7EN25	Cluster: Lipoxygenase	UniProtKB Unreviewed (TrEMBL)	1	Solanum lycopersicum (Tomato)	1634	0.9	probable linoleate 9S-lipoxygenase 5	186203	1585.64	5	162	3.8556	29.9481	70	37.1606	true	[BLASTED, MAPPED, ANNOTATED]	tr|A0A3Q7EN25|A0A3Q7EN25_SOLLC	Lipoxygenase OS=Solanum lycopersicum OX=4081 PE=3 SV=1	1634	20	0	82.27	4	P:GO:0006633; P:GO:0031408; F:GO:0016702; F:GO:0046872	P:fatty acid biosynthetic process; P:oxylipin biosynthetic process; F:oxidoreductase activity, acting on single donors with incorporation of molecular oxygen, incorporation of two atoms of oxygen; F:metal ion binding	EC:1.13.11	Acting on single donors with incorporation of molecular oxygen (oxygenases). The oxygen incorporated need not be derived from O(2)
110	A0A3Q7IS88_SOLLC	UniRef90_A0A3Q7IS88	Cluster: PEROXIDASE_4 domain-containing protein	UniProtKB Unreviewed (TrEMBL); UniParc	17	Solanum lycopersicum (Tomato); Nicotiana tabacum (Common tobacco); Solanum chacoense (Chaco potato); Solanum tuberosum (Potato); Nicotiana attenuata (Coyote tobacco); Capsicum annuum (Capsicum pepper); Capsicum baccatum (Peruvian pepper); Capsicum chinense (Scotch bonnet); Solanum chilense (Tomato); Nicotiana sylvestris (Wood tobacco); Nicotiana tomentosiformis; Solanum verrucosum; Solanum pennel…	250	0.9	L-ascorbate peroxidase 2, cytosolic	27618	1441.83	5	27	28.8	0.3132	59	35.2529	true	[BLASTED, MAPPED, ANNOTATED]	tr|A0A3Q7IS88|A0A3Q7IS88_SOLLC	PEROXIDASE_4 domain-containing protein OS=Solanum lycopersicum OX=4081 GN=101258987 PE=3 SV=1	250	20	0	98.55	9	P:GO:0000302; P:GO:0034599; P:GO:0042744; P:GO:0098869; F:GO:0016688; F:GO:0020037; F:GO:0046872; C:GO:0005576; C:GO:0009507	P:response to reactive oxygen species; P:cellular response to oxidative stress; P:hydrogen peroxide catabolic process; P:cellular oxidant detoxification; F:L-ascorbate peroxidase activity; F:heme binding; F:metal ion binding; C:extracellular region; C:chloroplast	EC:1.11.1.11	L-ascorbate peroxidase
111	A0A3Q7ILG0_SOLLC	UniRef90_P59220	Cluster: Calmodulin-7	UniProtKB Reviewed (Swiss-Prot); UniProtKB Unreviewed (TrEMBL); UniParc	286	Arabidopsis thaliana (Mouse-ear cress); Daucus carota (Wild carrot); Petunia hybrida (Petunia); Bryonia dioica (Red bryony); Euphorbia characias (Albanian spurge); Lilium longiflorum (Trumpet lily); Daucus carota subsp. sativus (Carrot); Camellia sinensis var. sinensis; Nymphaea colorata; Trifolium pratense (Red clover); Trifolium medium; Ensete ventricosum (Abyssinian banana); Panicum miliaceum …	149	0.9	calmodulin-7-like isoform X2	16836	1144.87	5	23	42.2819	6.785	44	38.2645	true	[BLASTED, MAPPED, ANNOTATED]	tr|A0A3Q7ILG0|A0A3Q7ILG0_SOLLC	Uncharacterized protein OS=Solanum lycopersicum OX=4081 GN=544131 PE=4 SV=1	149	20	1.60736e-103	100	3	P:GO:0006468; F:GO:0004683; F:GO:0005509	P:protein phosphorylation; F:calmodulin-dependent protein kinase activity; F:calcium ion binding	EC:2.7.11.17	Calcium/calmodulin-dependent protein kinase
112	A0A3Q7H0E8_SOLLC	UniRef90_A0A1S3XTF3	Cluster: 40S ribosomal protein S7	UniProtKB Unreviewed (TrEMBL); UniParc	25	Nicotiana tabacum (Common tobacco); Nicotiana sylvestris (Wood tobacco); Nicotiana attenuata (Coyote tobacco); Solanum tuberosum (Potato); Coffea arabica (Arabian coffee); Solanum lycopersicum (Tomato); Solanum chilense (Tomato); Solanum chacoense (Chaco potato); Solanum stenotomum; Kribbella monticola; Solanum verrucosum	191	0.9	40S ribosomal protein S7-like	22113	1091.33	5	23	30.8901	17.797	45	30.5567	true	[BLASTED, MAPPED, ANNOTATED]	tr|A0A3Q7H0E8|A0A3Q7H0E8_SOLLC	40S ribosomal protein S7 OS=Solanum lycopersicum OX=4081 GN=101268693 PE=3 SV=1	191	20	6.56571e-136	98.19	9	P:GO:0006364; P:GO:0006412; P:GO:0042274; P:GO:0090502; F:GO:0003676; F:GO:0003735; F:GO:0004523; C:GO:0022627; C:GO:0032040	P:rRNA processing; P:translation; P:ribosomal small subunit biogenesis; P:RNA phosphodiester bond hydrolysis, endonucleolytic; F:nucleic acid binding; F:structural constituent of ribosome; F:RNA-DNA hybrid ribonuclease activity; C:cytosolic small ribosomal subunit; C:small-subunit processome	EC:3.1.30; EC:3.1.26.4	Acting on ester bonds; Ribonuclease H
113	A0A3Q7IJX7_SOLLC	UniRef90_A0A3Q7IJX7	Cluster: Histidine decarboxylase	UniProtKB Unreviewed (TrEMBL); UniParc	3	Solanum lycopersicum (Tomato); Solanum pennellii	444	0.9	histidine decarboxylase-like	50833	929.927	5	41	14.1892	4.0704	56	21.6993	true	[BLASTED, MAPPED, ANNOTATED]	tr|A0A3Q7IJX7|A0A3Q7IJX7_SOLLC	Uncharacterized protein OS=Solanum lycopersicum OX=4081 GN=101248029 PE=3 SV=1	444	20	0	90.13	3	P:GO:0019752; F:GO:0004398; F:GO:0030170	P:carboxylic acid metabolic process; F:histidine decarboxylase activity; F:pyridoxal phosphate binding	EC:4.1.1.22	Histidine decarboxylase
114	Q6SKP4_SOLLC	UniRef90_Q6SKP4	Cluster: Ribosomal protein L3	UniProtKB Unreviewed (TrEMBL); UniParc	23	Solanum lycopersicum (Tomato); Solanum chilense (Tomato); Solanum chacoense (Chaco potato); Capsicum chinense (Scotch bonnet); Capsicum baccatum (Peruvian pepper); Capsicum annuum (Capsicum pepper); Solanum tuberosum (Potato); Nicotiana tabacum (Common tobacco); Nicotiana attenuata (Coyote tobacco); Nicotiana sylvestris (Wood tobacco); Salvia splendens (Scarlet sage); Ipomoea triloba; Solanum ver…	389	0.9	60S ribosomal protein L3	44379	704.561	5	41	12.0823	1.0929	35	22.087	true	[BLASTED, MAPPED, ANNOTATED]	tr|Q6SKP4|Q6SKP4_SOLLC	Ribosomal protein L3 OS=Solanum lycopersicum OX=4081 GN=RPL3 PE=2 SV=1	389	20	0	98.69	5	P:GO:0000027; P:GO:0006412; F:GO:0003723; F:GO:0003735; C:GO:0022625	P:ribosomal large subunit assembly; P:translation; F:RNA binding; F:structural constituent of ribosome; C:cytosolic large ribosomal subunit
115	A0A3Q7FU78_SOLLC	UniRef90_A0A3Q7FU78	Cluster: Calreticulin	UniProtKB Unreviewed (TrEMBL)	1	Solanum lycopersicum (Tomato)	748	0.9	calnexin homolog 1-like	83935	651.491	5	64	9.492	17.0873	42	28.1404	true	[BLASTED, MAPPED, ANNOTATED]	tr|A0A3Q7FU78|A0A3Q7FU78_SOLLC	Uncharacterized protein OS=Solanum lycopersicum OX=4081 PE=3 SV=1	748	20	0	91.99	7	P:GO:0006457; P:GO:0030433; F:GO:0005509; F:GO:0030246; F:GO:0051082; C:GO:0005789; C:GO:0016021	P:protein folding; P:ubiquitin-dependent ERAD pathway; F:calcium ion binding; F:carbohydrate binding; F:unfolded protein binding; C:endoplasmic reticulum membrane; C:integral component of membrane
116	A0A3Q7HFP1_SOLLC	UniRef90_M1C102	Cluster: glycerophosphodiester phosphodiesterase	UniProtKB Unreviewed (TrEMBL); UniParc	8	Solanum tuberosum (Potato); Solanum chacoense (Chaco potato); Solanum chilense (Tomato); Solanum lycopersicum (Tomato); Solanum pennellii; Solanum verrucosum; Solanum stenotomum	753	0.9	glycerophosphodiester phosphodiesterase GDPDL4	82092	351.984	5	36	9.8274	2.8178	44	20.2951	true	[BLASTED, MAPPED, ANNOTATED]	tr|A0A3Q7HFP1|A0A3Q7HFP1_SOLLC	Glycerophosphodiester phosphodiesterase OS=Solanum lycopersicum OX=4081 GN=101262834 PE=4 SV=1	753	20	0	88.57	4	P:GO:0006071; P:GO:0006629; F:GO:0008889; C:GO:0016021	P:glycerol metabolic process; P:lipid metabolic process; F:glycerophosphodiester phosphodiesterase activity; C:integral component of membrane	EC:3.1.4.46	Glycerophosphodiester phosphodiesterase
117	A0A3Q7HMR2_SOLLC	UniRef90_A0A3Q7HMR2	Cluster: Tr-type G domain-containing protein	UniProtKB Unreviewed (TrEMBL); UniParc	36	Solanum lycopersicum (Tomato); Cucumis melo var. makuwa; Cucumis melo (Muskmelon); Mucuna pruriens (Velvet bean); Rhizophora mucronata (Asiatic mangrove); Castanea mollissima (Chinese chestnut); Quercus lobata (Valley oak); Citrus sinensis (Sweet orange); Citrus clementina (Clementine); Sesamum indicum (Oriental sesame); Handroanthus impetiginosus; Artemisia annua (Sweet wormwood); Kalanchoe fedt…	843	0.9	elongation factor 2	94072	331.464	5	73	6.2871	17.9591	66	30.32	true	[BLASTED, MAPPED, ANNOTATED]	tr|A0A3Q7HMR2|A0A3Q7HMR2_SOLLC	Tr-type G domain-containing protein OS=Solanum lycopersicum OX=4081 PE=3 SV=1	843	20	0	99.37	6	P:GO:0006414; F:GO:0003746; F:GO:0003924; F:GO:0005525; F:GO:0043022; C:GO:1990904	P:translational elongation; F:translation elongation factor activity; F:GTPase activity; F:GTP binding; F:ribosome binding; C:ribonucleoprotein complex	EC:3.6.1	Acting on acid anhydrides
118	A0A3Q7JP71_SOLLC	UniRef90_A0A3Q7JP71	Cluster: 60S acidic ribosomal protein P2	UniProtKB Unreviewed (TrEMBL); UniParc	6	Solanum lycopersicum (Tomato); Solanum chilense (Tomato); Solanum tuberosum (Potato); Solanum chacoense (Chaco potato); Solanum verrucosum	113	0.9	60S acidic ribosomal protein P2-1	11411	5890.5	4	12	74.3363	0.4123	53	24.9948	true	[BLASTED, MAPPED, ANNOTATED]	tr|A0A3Q7JP71|A0A3Q7JP71_SOLLC	Uncharacterized protein OS=Solanum lycopersicum OX=4081 GN=101253452 PE=3 SV=1	113	20	1.91043e-69	87.42	3	P:GO:0002182; F:GO:0003735; C:GO:0022625	P:cytoplasmic translational elongation; F:structural constituent of ribosome; C:cytosolic large ribosomal subunit
119	A0A2D1PJL0_SOLLC	UniRef90_Q43779	Cluster: Superoxide dismutase [Cu-Zn] 2	UniProtKB Reviewed (Swiss-Prot); UniProtKB Unreviewed (TrEMBL); UniParc	15	Solanum lycopersicum (Tomato); Ipomoea batatas (Sweet potato); Solanum tuberosum (Potato); Solanum chilense (Tomato); Solanum nigrum (Black nightshade); Solanum melongena (Eggplant); Solanum stenotomum; Solanum verrucosum	152	0.9	superoxide dismutase [Cu-Zn]	14935	2876.08	4	7	36.2416	0.302	35	22.7927	true	[BLASTED, MAPPED, ANNOTATED]	tr|A0A2D1PJL0|A0A2D1PJL0_SOLLC	Superoxide dismutase (Fragment) OS=Solanum lycopersicum OX=4081 PE=2 SV=1	149	20	1.59015e-101	96.06	4	P:GO:0019430; F:GO:0004784; F:GO:0005507; C:GO:0005737	P:removal of superoxide radicals; F:superoxide dismutase activity; F:copper ion binding; C:cytoplasm	EC:1.15.1.1	Superoxide dismutase
120	A0A3Q7FR32_SOLLC	UniRef90_A0A3Q7FR32	Cluster: SHSP domain-containing protein	UniProtKB Unreviewed (TrEMBL); UniParc	7	Solanum lycopersicum (Tomato); Solanum tuberosum (Potato); Solanum chilense (Tomato); Solanum pennellii; Solanum verrucosum; Solanum stenotomum	180	0.9	22.0 kDa class IV heat shock protein-like	20546	1704.67	4	15	22.7778	0.9596	26	28.0946	true	[BLASTED, MAPPED, ANNOTATED]	tr|A0A3Q7FR32|A0A3Q7FR32_SOLLC	SHSP domain-containing protein OS=Solanum lycopersicum OX=4081 PE=3 SV=1	180	20	1.42439e-127	90.27	8	P:GO:0006457; P:GO:0009408; P:GO:0009651; P:GO:0042542; P:GO:0051259; F:GO:0043621; F:GO:0051082; C:GO:0005737	P:protein folding; P:response to heat; P:response to salt stress; P:response to hydrogen peroxide; P:protein complex oligomerization; F:protein self-association; F:unfolded protein binding; C:cytoplasm
121	A0A3Q7HBR5_SOLLC	UniRef90_A0A3Q7HBR5	Cluster: KH type-2 domain-containing protein	UniProtKB Unreviewed (TrEMBL); UniParc	7	Solanum lycopersicum (Tomato); Solanum chilense (Tomato); Solanum chacoense (Chaco potato); Solanum tuberosum (Potato); Capsicum annuum (Capsicum pepper); Solanum verrucosum	239	0.9	40S ribosomal protein S3-3-like	26770	1595.29	4	28	20.0837	33.1388	40	28.6684	true	[BLASTED, MAPPED, ANNOTATED]	tr|A0A3Q7HBR5|A0A3Q7HBR5_SOLLC	KH type-2 domain-containing protein OS=Solanum lycopersicum OX=4081 GN=101257282 PE=3 SV=1	239	20	7.00259e-174	96.28	5	P:GO:0006412; F:GO:0003735; F:GO:0019843; C:GO:0005634; C:GO:0022627	P:translation; F:structural constituent of ribosome; F:rRNA binding; C:nucleus; C:cytosolic small ribosomal subunit
122	A0A3Q7ENW6_SOLLC	UniRef90_A0A3Q7ENW6	Cluster: Usp domain-containing protein	UniProtKB Unreviewed (TrEMBL); UniParc	17	Solanum lycopersicum (Tomato); Solanum chilense (Tomato); Capsicum chinense (Scotch bonnet); Capsicum annuum (Capsicum pepper); Solanum chacoense (Chaco potato); Solanum tuberosum (Potato); Solanum pennellii; Solanum stenotomum; Solanum verrucosum	166	0.9	universal stress protein A-like protein isoform X2	18026	1577.93	4	15	34.9398	0.9427	27	15.4885	true	[BLASTED]	tr|A0A3Q7ENW6|A0A3Q7ENW6_SOLLC	Usp domain-containing protein OS=Solanum lycopersicum OX=4081 GN=101245588 PE=4 SV=1	166	20	9.55414e-119	93.55
123	G3JX11_SOLLC	UniRef90_P54153	Cluster: Peptide methionine sulfoxide reductase (Fragment)	UniProtKB Reviewed (Swiss-Prot); UniProtKB Unreviewed (TrEMBL); UniParc	7	Solanum lycopersicum (Tomato); Solanum melongena (Eggplant); Solanum chilense (Tomato); Solanum chacoense (Chaco potato); Solanum pennellii; Solanum verrucosum	196	0.9	peptide methionine sulfoxide reductase	21061	1255.47	4	17	29.7872	0.8244	35	15.4426	true	[BLASTED, MAPPED, ANNOTATED]	tr|G3JX11|G3JX11_SOLLC	Protein-methionine-S-oxide reductase OS=Solanum lycopersicum OX=4081 GN=MSRA PE=3 SV=1	188	20	6.16637e-140	93.03	4	P:GO:0034599; F:GO:0008113; F:GO:0036456; C:GO:0005737	P:cellular response to oxidative stress; F:peptide-methionine (S)-S-oxide reductase activity; F:L-methionine-(S)-S-oxide reductase activity; C:cytoplasm	EC:1.8.4.13; EC:1.8.4.11	L-methionine (S)-S-oxide reductase; Peptide-methionine (S)-S-oxide reductase
124	A0A3Q7IRG8_SOLLC	UniRef90_Q8W4C8	Cluster: ADP-ribosylation factor-like protein 8c	UniProtKB Reviewed (Swiss-Prot); UniProtKB Unreviewed (TrEMBL); UniParc	106	Arabidopsis thaliana (Mouse-ear cress); Arabidopsis suecica (Swedish thale-cress); Arabidopsis thaliana x Arabidopsis arenosa; Solanum chacoense (Chaco potato); Coffea arabica (Arabian coffee); Quercus lobata (Valley oak); Brassica carinata (Ethiopian mustard); Glycine max (Soybean); Hibiscus syriacus (Rose of Sharon); Brassica cretica (Mustard); Capsicum chinense (Scotch bonnet); Capsicum annuum…	184	0.9	ADP-ribosylation factor-like protein 8B	20639	1225.82	4	20	31.5217	0.5332	25	19.2496	true	[BLASTED, MAPPED, ANNOTATED]	tr|A0A3Q7IRG8|A0A3Q7IRG8_SOLLC	Uncharacterized protein OS=Solanum lycopersicum OX=4081 GN=101254552 PE=3 SV=1	184	20	2.55161e-132	98.94	4	P:GO:0015031; F:GO:0003924; F:GO:0005525; C:GO:0005774	P:protein transport; F:GTPase activity; F:GTP binding; C:vacuolar membrane	EC:3.6.1	Acting on acid anhydrides
125	A0A3Q7FF75_SOLLC	UniRef90_A0A3Q7FF75	Cluster: LysM domain-containing GPI-anchored protein 2	UniProtKB Unreviewed (TrEMBL); UniParc	9	Solanum lycopersicum (Tomato); Solanum chacoense (Chaco potato); Solanum tuberosum (Potato); Solanum chilense (Tomato); Solanum verrucosum; Solanum stenotomum; Solanum pennellii	345	0.9	lysM domain-containing GPI-anchored protein 2	37217	1163.16	4	18	20.2899	7.7123	47	37.8707	true	[BLASTED, MAPPED, ANNOTATED]	tr|A0A3Q7FF75|A0A3Q7FF75_SOLLC	Uncharacterized protein OS=Solanum lycopersicum OX=4081 GN=101253732 PE=4 SV=1	345	20	0	86.03	4	F:GO:0008061; C:GO:0009506; C:GO:0016021; C:GO:0046658	F:chitin binding; C:plasmodesma; C:integral component of membrane; C:anchored component of plasma membrane
126	A0A0U1ZGK5_9SOLN	UniRef90_Q2MIB5	Cluster: ATP synthase subunit alpha, chloroplastic	UniProtKB Reviewed (Swiss-Prot); UniProtKB Unreviewed (TrEMBL); UniParc	93	Solanum lycopersicum (Tomato); Solanum bulbocastanum (Wild potato); Solanum tuberosum (Potato); Solanum violaceimarmoratum; Solanum megistacrolobum; Solanum avilesii; Solanum stenotomum subsp. goniocalyx; Solanum tarijense; Solanum phureja; Solanum ambosinum; Solanum spegazzinii; Solanum bukasovii f. multidissectum; Solanum vernei; Solanum sogarandinum; Solanum stenotomum; Solanum pimpinellifoliu…	507	0.9	AtpA	55377	1158.91	4	36	9.8619	36.5764	33	43.1887	true	[BLASTED, MAPPED, ANNOTATED]	tr|A0A0U1ZGK5|A0A0U1ZGK5_9SOLN	ATP synthase subunit alpha_ chloroplastic OS=Solanum neorickii OX=62891 GN=atpA PE=3 SV=1	507	20	0	99.88	7	P:GO:0015986; F:GO:0005524; F:GO:0043531; F:GO:0046933; F:GO:0046961; C:GO:0009535; C:GO:0045261	P:ATP synthesis coupled proton transport; F:ATP binding; F:ADP binding; F:proton-transporting ATP synthase activity, rotational mechanism; F:proton-transporting ATPase activity, rotational mechanism; C:chloroplast thylakoid membrane; C:proton-transporting ATP synthase complex, catalytic core F(1)	EC:7.1.3.1; EC:7.1.2.2; EC:6	H(+)-exporting diphosphatase; H(+)-transporting two-sector ATPase; Ligases
127	O24033_SOLLC	UniRef90_O24033	Cluster: Calmodulin (Fragment)	UniProtKB Unreviewed (TrEMBL)	1	Solanum lycopersicum (Tomato)	118	0.9	calmodulin	13307	1075.6	4	19	38.9831	10.2405	34	34.7156	true	[BLASTED, MAPPED, ANNOTATED]	tr|O24033|O24033_SOLLC	Calmodulin (Fragment) OS=Solanum lycopersicum OX=4081 GN=N6 PE=2 SV=1	118	20	8.81358e-79	100	2	F:GO:0005509; C:GO:0016021	F:calcium ion binding; C:integral component of membrane
128	Q9XEX8_SOLLC	UniRef90_Q9XEX8	Cluster: Remorin 1	UniProtKB Unreviewed (TrEMBL)	1	Solanum lycopersicum (Tomato)	197	0.9	remorin	21836	1043.4	4	35	25.8883	0.3977	34	19.3033	true	[BLASTED, MAPPED, ANNOTATED]	tr|Q9XEX8|Q9XEX8_SOLLC	Remorin 1 OS=Solanum lycopersicum OX=4081 GN=rem-1 PE=2 SV=1	197	20	1.60958e-128	87.3	3	P:GO:0007267; F:GO:0048032; C:GO:0005886	P:cell-cell signaling; F:galacturonate binding; C:plasma membrane
129	A0A3Q7FAA3_SOLLC	UniRef90_A0A1U7VK43	Cluster: 40S ribosomal protein S12	UniProtKB Unreviewed (TrEMBL); UniParc	35	Nicotiana sylvestris (Wood tobacco); Nicotiana tabacum (Common tobacco); Capsicum baccatum (Peruvian pepper); Capsicum annuum (Capsicum pepper); Nicotiana attenuata (Coyote tobacco); Solanum tuberosum (Potato); Solanum lycopersicum (Tomato); Sesamum indicum (Oriental sesame); Solanum chilense (Tomato); Solanum chacoense (Chaco potato); Nicotiana tomentosiformis; Pseudomonas putida; Solanum verruc…	141	0.9	40S ribosomal protein S12-like isoform X1	15102	982.741	4	12	39.8601	10.2937	33	21.4481	true	[BLASTED, MAPPED, ANNOTATED]	tr|A0A3Q7FAA3|A0A3Q7FAA3_SOLLC	40S ribosomal protein S12 OS=Solanum lycopersicum OX=4081 GN=101247070 PE=3 SV=1	143	20	5.03533e-98	95.36	3	P:GO:0006412; F:GO:0003735; C:GO:0022627	P:translation; F:structural constituent of ribosome; C:cytosolic small ribosomal subunit
130	A0A3Q7ENA4_SOLLC	UniRef90_A0A3Q7ENA4	Cluster: Lipoxygenase	UniProtKB Unreviewed (TrEMBL)	2	Solanum lycopersicum (Tomato); Solanum chilense (Tomato)	854	0.9	putative linoleate 9S-lipoxygenase 5	96952	965.476	4	86	10.1874	34.0175	65	29.6712	true	[BLASTED, MAPPED, ANNOTATED]	tr|A0A3Q7ENA4|A0A3Q7ENA4_SOLLC	Lipoxygenase OS=Solanum lycopersicum OX=4081 GN=107648852 PE=3 SV=1	854	20	0	91.43	5	P:GO:0006633; P:GO:0031408; P:GO:0034440; F:GO:0016702; F:GO:0046872	P:fatty acid biosynthetic process; P:oxylipin biosynthetic process; P:lipid oxidation; F:oxidoreductase activity, acting on single donors with incorporation of molecular oxygen, incorporation of two atoms of oxygen; F:metal ion binding	EC:1.13.11	Acting on single donors with incorporation of molecular oxygen (oxygenases). The oxygen incorporated need not be derived from O(2)
131	Q84LR0_SOLLC	UniRef90_M1CC35	Cluster: Metal transporter	UniProtKB Unreviewed (TrEMBL); UniParc	15	Solanum tuberosum (Potato); Solanum chacoense (Chaco potato); Nicotiana tabacum (Common tobacco); Capsicum baccatum (Peruvian pepper); Capsicum annuum (Capsicum pepper); Capsicum chinense (Scotch bonnet); Solanum lycopersicum (Tomato); Solanum chilense (Tomato); Solanum stenotomum; Solanum verrucosum; Nicotiana tomentosiformis; Solanum pennellii	515	0.9	metal transporter Nramp3-like	56111	908.788	4	29	13.556	0.3687	41	17.6394	true	[BLASTED, MAPPED, ANNOTATED]	tr|Q84LR0|Q84LR0_SOLLC	Metal transporter OS=Solanum lycopersicum OX=4081 PE=2 SV=1	509	20	0	93.53	9	P:GO:0042742; P:GO:0055072; P:GO:0070574; P:GO:0071421; P:GO:2000379; F:GO:0005384; F:GO:0015086; C:GO:0005774; C:GO:0016021	P:defense response to bacterium; P:iron ion homeostasis; P:cadmium ion transmembrane transport; P:manganese ion transmembrane transport; P:positive regulation of reactive oxygen species metabolic process; F:manganese ion transmembrane transporter activity; F:cadmium ion transmembrane transporter activity; C:vacuolar membrane; C:integral component of membrane	EC:7	Translocases
132	A0A3Q7F3S0_SOLLC	UniRef90_P47921	Cluster: Nucleoside diphosphate kinase (Fragment)	UniProtKB Reviewed (Swiss-Prot); UniProtKB Unreviewed (TrEMBL); UniParc	47	Solanum lycopersicum (Tomato); Capsicum annuum (Capsicum pepper); Flaveria bidentis (Coastal plain yellowtops); Nicotiana tabacum (Common tobacco); Cuscuta campestris; Solanum tuberosum (Potato); Solanum chacoense (Chaco potato); Striga asiatica (Asiatic witchweed); Nicotiana attenuata (Coyote tobacco); Helianthus annuus (Common sunflower); Handroanthus impetiginosus; Nicotiana sylvestris (Wood t…	144	0.9	nucleoside diphosphate kinase	16241	892.798	4	13	20.9459	6.1654	27	17.2481	true	[BLASTED, MAPPED, ANNOTATED]	tr|A0A3Q7F3S0|A0A3Q7F3S0_SOLLC	Nucleoside diphosphate kinase OS=Solanum lycopersicum OX=4081 GN=544095 PE=3 SV=1	148	20	2.56376e-102	97.23	7	P:GO:0006165; P:GO:0006183; P:GO:0006228; P:GO:0006241; F:GO:0004550; F:GO:0005524; F:GO:0046872	P:nucleoside diphosphate phosphorylation; P:GTP biosynthetic process; P:UTP biosynthetic process; P:CTP biosynthetic process; F:nucleoside diphosphate kinase activity; F:ATP binding; F:metal ion binding	EC:2.7.4.6	Nucleoside-diphosphate kinase
133	A0A3Q7I5Y6_SOLLC	UniRef90_A0A3Q7I5Y6	Cluster: Cupin type-1 domain-containing protein	UniProtKB Unreviewed (TrEMBL); UniParc	7	Solanum lycopersicum (Tomato); Solanum tuberosum (Potato); Solanum stenotomum; Solanum verrucosum; Solanum pennellii	381	0.9	vicilin-like antimicrobial peptides 2-2	42692	750.056	4	35	13.6483	0.927	22	30.5071	true	[BLASTED]	tr|A0A3Q7I5Y6|A0A3Q7I5Y6_SOLLC	Uncharacterized protein OS=Solanum lycopersicum OX=4081 PE=4 SV=1	381	20	0	86
134	A0A3Q7J3B7_SOLLC	UniRef90_M1ADJ6	Cluster: V-type proton ATPase subunit H	UniProtKB Unreviewed (TrEMBL); UniParc	9	Solanum tuberosum (Potato); Solanum chacoense (Chaco potato); Solanum lycopersicum (Tomato); Solanum chilense (Tomato); Solanum verrucosum; Solanum pennellii; Solanum stenotomum	454	0.9	V-type proton ATPase subunit H-like	51423	725.15	4	45	6.3877	16.9783	32	26.6087	true	[BLASTED, MAPPED, ANNOTATED]	tr|A0A3Q7J3B7|A0A3Q7J3B7_SOLLC	V-type proton ATPase subunit H OS=Solanum lycopersicum OX=4081 GN=101264594 PE=3 SV=1	454	20	0	94.79	4	P:GO:1902600; F:GO:0020037; F:GO:0046961; C:GO:0000221	P:proton transmembrane transport; F:heme binding; F:proton-transporting ATPase activity, rotational mechanism; C:vacuolar proton-transporting V-type ATPase, V1 domain	EC:7.1.3.1	H(+)-exporting diphosphatase
135	A0A3Q7HHB8_SOLLC	UniRef90_A0A3Q7HHB8	Cluster: EF-hand domain-containing protein	UniProtKB Unreviewed (TrEMBL); UniParc	8	Solanum lycopersicum (Tomato); Solanum chacoense (Chaco potato); Solanum chilense (Tomato); Solanum tuberosum (Potato); Solanum stenotomum; Solanum verrucosum; Solanum pennellii	589	0.9	sodium/calcium exchanger NCL-like	63869	413.72	4	29	12.0543	1.1387	48	23.7067	true	[BLASTED, MAPPED, ANNOTATED]	tr|A0A3Q7HHB8|A0A3Q7HHB8_SOLLC	Uncharacterized protein OS=Solanum lycopersicum OX=4081 GN=101263533 PE=4 SV=1	589	20	0	90.37	12	P:GO:0006874; P:GO:0035725; P:GO:0070588; P:GO:0071472; F:GO:0003729; F:GO:0005432; F:GO:0005509; F:GO:0015369; C:GO:0000325; C:GO:0005774; C:GO:0009506; C:GO:0016021	P:cellular calcium ion homeostasis; P:sodium ion transmembrane transport; P:calcium ion transmembrane transport; P:cellular response to salt stress; F:mRNA binding; F:calcium:sodium antiporter activity; F:calcium ion binding; F:calcium:proton antiporter activity; C:plant-type vacuole; C:vacuolar membrane; C:plasmodesma; C:integral component of membrane	EC:7	Translocases
136	B0ZYZ9_SOLLC	UniRef90_B0ZYZ9	Cluster: Actin (Fragment)	UniProtKB Unreviewed (TrEMBL)	1	Solanum lycopersicum (Tomato)	88	0.9	actin	10167	21295.3	3	12	56.8182	19.4367	51	16.8299	true	[BLASTED, MAPPED, ANNOTATED]	tr|B0ZYZ9|B0ZYZ9_SOLLC	Actin (Fragment) OS=Solanum lycopersicum OX=4081 PE=2 SV=1	88	20	1.27162e-57	96.59	6	P:GO:0051301; F:GO:0005524; C:GO:0005829; C:GO:0005856; C:GO:0005886; C:GO:0009506	P:cell division; F:ATP binding; C:cytosol; C:cytoskeleton; C:plasma membrane; C:plasmodesma
137	A0A3Q7IIZ3_SOLLC	UniRef90_O82013	Cluster: 17.3 kDa class II heat shock protein	UniProtKB Reviewed (Swiss-Prot); UniProtKB Unreviewed (TrEMBL); UniParc	37	Solanum peruvianum (Peruvian tomato); Solanum chacoense (Chaco potato); Capsicum annuum (Capsicum pepper); Capsicum chinense (Scotch bonnet); Capsicum baccatum (Peruvian pepper); Solanum tuberosum (Potato); Solanum lycopersicum (Tomato); Nicotiana attenuata (Coyote tobacco); Nicotiana sylvestris (Wood tobacco); Nicotiana tabacum (Common tobacco); Escherichia coli; Solanum verrucosum	155	0.9	17.3 kDa class II heat shock protein-like	17323	19869.8	3	13	27.7419	1.2339	115	16.5329	true	[BLASTED, MAPPED, ANNOTATED]	tr|A0A3Q7IIZ3|A0A3Q7IIZ3_SOLLC	SHSP domain-containing protein OS=Solanum lycopersicum OX=4081 GN=543572 PE=3 SV=1	155	20	1.9869e-109	93.97	8	P:GO:0006457; P:GO:0009408; P:GO:0009651; P:GO:0042542; P:GO:0051259; F:GO:0043621; F:GO:0051082; C:GO:0005737	P:protein folding; P:response to heat; P:response to salt stress; P:response to hydrogen peroxide; P:protein complex oligomerization; F:protein self-association; F:unfolded protein binding; C:cytoplasm
138	A0A3Q7GNF0_SOLLC	UniRef90_A0A3Q7GNF0	Cluster: Usp domain-containing protein	UniProtKB Unreviewed (TrEMBL); UniParc	6	Solanum lycopersicum (Tomato); Solanum chacoense (Chaco potato); Solanum tuberosum (Potato); Solanum verrucosum; Solanum pennellii; Solanum stenotomum	161	0.9	universal stress protein PHOS34	17472	14597.5	3	12	25.4658	0.1867	82	10.5571	true	[BLASTED]	tr|A0A3Q7GNF0|A0A3Q7GNF0_SOLLC	Usp domain-containing protein OS=Solanum lycopersicum OX=4081 GN=101256975 PE=4 SV=1	161	20	8.80581e-113	89.07
139	A0A3Q7FT74_SOLLC	UniRef90_A0A3Q7FT74	Cluster: V-SNARE domain-containing protein	UniProtKB Unreviewed (TrEMBL); UniParc	15	Solanum lycopersicum (Tomato); Nicotiana tabacum (Common tobacco); Solanum chacoense (Chaco potato); Solanum chilense (Tomato); Solanum tuberosum (Potato); Capsicum chinense (Scotch bonnet); Capsicum annuum (Capsicum pepper); Nicotiana sylvestris (Wood tobacco); Solanum stenotomum	221	0.9	vesicle transport v-SNARE 13-like	25121	3613.7	3	21	14.4796	29.8881	24	12.9039	true	[BLASTED, MAPPED, ANNOTATED]	tr|A0A3Q7FT74|A0A3Q7FT74_SOLLC	V-SNARE domain-containing protein OS=Solanum lycopersicum OX=4081 GN=101266321 PE=3 SV=1	221	20	2.99289e-159	96.18	10	P:GO:0006886; P:GO:0006906; F:GO:0000149; F:GO:0005484; C:GO:0005789; C:GO:0005794; C:GO:0012507; C:GO:0016021; C:GO:0031201; C:GO:0031902	P:intracellular protein transport; P:vesicle fusion; F:SNARE binding; F:SNAP receptor activity; C:endoplasmic reticulum membrane; C:Golgi apparatus; C:ER to Golgi transport vesicle membrane; C:integral component of membrane; C:SNARE complex; C:late endosome membrane
140	A0A3Q7EEE3_SOLLC	UniRef90_A0A3Q7EEE3	Cluster: Usp domain-containing protein	UniProtKB Unreviewed (TrEMBL); UniParc	9	Solanum lycopersicum (Tomato); Solanum tuberosum (Potato); Solanum chilense (Tomato); Solanum habrochaites (Wild tomato); Solanum chacoense (Chaco potato); Solanum pennellii; Solanum verrucosum	172	0.9	universal stress protein A-like protein	18922	3464.73	3	13	25.5814	1.1452	42	19.9583	true	[BLASTED]	tr|A0A3Q7EEE3|A0A3Q7EEE3_SOLLC	Usp domain-containing protein OS=Solanum lycopersicum OX=4081 GN=101256409 PE=4 SV=1	172	20	3.78645e-124	88.91
141	A0A3Q7EPW1_SOLLC	UniRef90_Q6DUX3	Cluster: Translationally-controlled tumor protein homolog	UniProtKB Reviewed (Swiss-Prot); UniProtKB Unreviewed (TrEMBL); UniParc	7	Solanum lycopersicum (Tomato); Solanum chilense (Tomato); Solanum chacoense (Chaco potato); Solanum pennellii	168	0.9	translationally-controlled tumor protein homolog	18900	3379.73	3	21	22.619	0.1371	22	9.9582	true	[BLASTED, MAPPED, ANNOTATED]	tr|A0A3Q7EPW1|A0A3Q7EPW1_SOLLC	TCTP domain-containing protein OS=Solanum lycopersicum OX=4081 GN=543941 PE=3 SV=1	168	20	2.34153e-119	96.25	2	F:GO:0005509; C:GO:0005737	F:calcium ion binding; C:cytoplasm
142	CYPH_SOLLC	UniRef90_P21568	Cluster: Peptidyl-prolyl cis-trans isomerase	UniProtKB Reviewed (Swiss-Prot); UniProtKB Unreviewed (TrEMBL); UniParc	32	Solanum lycopersicum (Tomato); Capsicum annuum (Capsicum pepper); Nicotiana tabacum (Common tobacco); Capsicum chinense (Scotch bonnet); Capsicum baccatum (Peruvian pepper); Nicotiana sylvestris (Wood tobacco); Nicotiana attenuata (Coyote tobacco); Solanum chilense (Tomato); Solanum chacoense (Chaco potato); Solanum commersonii (Commerson's wild potato); Solanum sogarandinum; Solanum rostratum (B…	171	0.9	peptidyl-prolyl cis-trans isomerase	17898	3264.14	3	15	19.883	0.3624	32	12.4223	true	[BLASTED, MAPPED, ANNOTATED]	sp|P21568|CYPH_SOLLC	Peptidyl-prolyl cis-trans isomerase OS=Solanum lycopersicum OX=4081 GN=CYP PE=2 SV=1	171	20	1.15281e-121	97.28	10	P:GO:0000413; P:GO:0006457; F:GO:0003755; F:GO:0016018; C:GO:0005774; C:GO:0005794; C:GO:0005829; C:GO:0005886; C:GO:0009507; C:GO:0048046	P:protein peptidyl-prolyl isomerization; P:protein folding; F:peptidyl-prolyl cis-trans isomerase activity; F:cyclosporin A binding; C:vacuolar membrane; C:Golgi apparatus; C:cytosol; C:plasma membrane; C:chloroplast; C:apoplast	EC:5.2.1.8	Peptidylprolyl isomerase
143	A0A3Q7F9P0_SOLLC	UniRef90_A0A3Q7F9P0	Cluster: SHSP domain-containing protein	UniProtKB Unreviewed (TrEMBL); UniParc	3	Solanum lycopersicum (Tomato); Solanum chilense (Tomato); Solanum pennellii	189	0.9	22.0 kDa class IV heat shock protein-like	21630	1559.86	3	17	15.3439	1.0687	20	14.0881	true	[BLASTED, MAPPED, ANNOTATED]	tr|A0A3Q7F9P0|A0A3Q7F9P0_SOLLC	SHSP domain-containing protein OS=Solanum lycopersicum OX=4081 GN=101254946 PE=3 SV=1	189	20	5.47166e-134	88.44	8	P:GO:0006457; P:GO:0009408; P:GO:0009651; P:GO:0042542; P:GO:0051259; F:GO:0043621; F:GO:0051082; C:GO:0005737	P:protein folding; P:response to heat; P:response to salt stress; P:response to hydrogen peroxide; P:protein complex oligomerization; F:protein self-association; F:unfolded protein binding; C:cytoplasm
144	A0A3Q7EPT6_SOLLC	UniRef90_A0A3Q7JYM3	Cluster: S10_plectin domain-containing protein	UniProtKB Unreviewed (TrEMBL); UniParc	33	Solanum lycopersicum (Tomato); Solanum chilense (Tomato); Nicotiana attenuata (Coyote tobacco); Capsicum baccatum (Peruvian pepper); Capsicum chinense (Scotch bonnet); Capsicum annuum (Capsicum pepper); Solanum tuberosum (Potato); Coffea arabica (Arabian coffee); Solanum chacoense (Chaco potato); Salvia splendens (Scarlet sage); Sesamum indicum (Oriental sesame); Handroanthus impetiginosus; Genli…	180	0.9	40S ribosomal protein S10-1-like	20099	1197.81	3	20	21.4286	0.9304	22	16.5781	true	[BLASTED, MAPPED, ANNOTATED]	tr|A0A3Q7EPT6|A0A3Q7EPT6_SOLLC	S10_plectin domain-containing protein OS=Solanum lycopersicum OX=4081 GN=101253133 PE=4 SV=1	182	20	6.83491e-128	98.07	3	F:GO:0003723; F:GO:0003735; C:GO:0022627	F:RNA binding; F:structural constituent of ribosome; C:cytosolic small ribosomal subunit
145	A0A3Q7FYD2_SOLLC	UniRef90_M1CDE9	Cluster: 40S ribosomal protein S26	UniProtKB Unreviewed (TrEMBL); UniParc	14	Solanum tuberosum (Potato); Solanum chacoense (Chaco potato); Solanum lycopersicum (Tomato); Solanum chilense (Tomato); Davidia involucrata (Dove tree); Genlisea aurea; Actinidia rufa; Actinidia chinensis var. chinensis (Chinese soft-hair kiwi); Cinnamomum micranthum f. kanehirae; Nyssa sinensis; Tetracentron sinense; Telopea speciosissima; Camellia sinensis	128	0.9	40S ribosomal protein S26-3-like	14579	1172.03	3	9	18.75	2.763	18	17.6641	true	[BLASTED, MAPPED, ANNOTATED]	tr|A0A3Q7FYD2|A0A3Q7FYD2_SOLLC	40S ribosomal protein S26 OS=Solanum lycopersicum OX=4081 GN=101247310 PE=3 SV=1	128	20	9.07771e-88	96.67	4	P:GO:0006412; F:GO:0003729; F:GO:0003735; C:GO:0022627	P:translation; F:mRNA binding; F:structural constituent of ribosome; C:cytosolic small ribosomal subunit
146	K4BTH5_SOLLC	UniRef90_K4BTH5	Cluster: H(+)-exporting diphosphatase	UniProtKB Unreviewed (TrEMBL); UniParc	31	Solanum lycopersicum (Tomato); Nicotiana sylvestris (Wood tobacco); Nicotiana tabacum (Common tobacco); Nicotiana attenuata (Coyote tobacco); Capsicum annuum (Capsicum pepper); Capsicum chinense (Scotch bonnet); Capsicum baccatum (Peruvian pepper); Cuscuta campestris; Cuscuta australis; Solanum tuberosum (Potato); Solanum chilense (Tomato); Solanum stenotomum; Solanum pennellii; Solanum verrucosu…	800	0.9	Pyrophosphate-energized membrane proton pump 3	84900	1108.16	3	52	6.25	13.4485	49	42.339	true	[BLASTED, MAPPED, ANNOTATED]	tr|K4BTH5|K4BTH5_SOLLC	H(+)-exporting diphosphatase OS=Solanum lycopersicum OX=4081 GN=LeVP3 PE=2 SV=1	800	20	0	96.9	4	P:GO:1902600; F:GO:0004427; F:GO:0009678; C:GO:0016021	P:proton transmembrane transport; F:inorganic diphosphatase activity; F:pyrophosphate hydrolysis-driven proton transmembrane transporter activity; C:integral component of membrane	EC:7.1.3.1; EC:3.6.1.1	H(+)-exporting diphosphatase; Inorganic diphosphatase
147	Q3I5C4_SOLLC	UniRef90_Q52QQ4	Cluster: Ascorbate peroxidase	UniProtKB Unreviewed (TrEMBL); UniParc	43	Solanum lycopersicum (Tomato); Capsicum annuum (Capsicum pepper); Capsicum chinense (Scotch bonnet); Coffea canephora (Robusta coffee); Coffea arabica x Coffea canephora; Solanum chacoense (Chaco potato); Picrorhiza kurrooa; Lycium chinense (Chinese wolfberry); Solanum chilense (Tomato); Solanum tuberosum (Potato); Coffea arabica (Arabian coffee); Sesamum indicum (Oriental sesame); Nicotiana sylv…	250	0.9	ascorbate peroxidase	27390	1099.36	3	22	13.6	1.2114	25	14.0453	true	[BLASTED, MAPPED, ANNOTATED]	tr|Q3I5C4|Q3I5C4_SOLLC	Cytosolic ascorbate peroxidase 1 OS=Solanum lycopersicum OX=4081 GN=APX1 PE=2 SV=1	250	20	0	97.24	9	P:GO:0000302; P:GO:0034599; P:GO:0042744; P:GO:0098869; F:GO:0016688; F:GO:0020037; F:GO:0046872; C:GO:0005576; C:GO:0009507	P:response to reactive oxygen species; P:cellular response to oxidative stress; P:hydrogen peroxide catabolic process; P:cellular oxidant detoxification; F:L-ascorbate peroxidase activity; F:heme binding; F:metal ion binding; C:extracellular region; C:chloroplast	EC:1.11.1.11	L-ascorbate peroxidase
148	A0A3Q7FGD5_SOLLC	UniRef90_Q8VY57	Cluster: ADP-ribosylation factor-like protein 8a	UniProtKB Reviewed (Swiss-Prot); UniProtKB Unreviewed (TrEMBL); UniParc	362	Arabidopsis thaliana (Mouse-ear cress); Eutrema salsugineum (Saltwater cress); Arabidopsis thaliana x Arabidopsis arenosa; Abrus precatorius (Indian licorice); Mucuna pruriens (Velvet bean); Cannabis sativa (Hemp); Phoenix dactylifera (Date palm); Solanum tuberosum (Potato); Solanum chacoense (Chaco potato); Actinidia chinensis var. chinensis (Chinese soft-hair kiwi); Solanum chilense (Tomato); P…	184	0.9	ADP-ribosylation factor-like protein 8A	20524	1087.2	3	14	23.913	0.7637	32	25.9476	true	[BLASTED, MAPPED, ANNOTATED]	tr|A0A3Q7FGD5|A0A3Q7FGD5_SOLLC	Uncharacterized protein OS=Solanum lycopersicum OX=4081 GN=101266697 PE=3 SV=1	184	20	7.46458e-133	98.99	4	P:GO:0015031; F:GO:0003924; F:GO:0005525; C:GO:0005774	P:protein transport; F:GTPase activity; F:GTP binding; C:vacuolar membrane	EC:3.6.1	Acting on acid anhydrides
149	A0A3Q7H256_SOLLC	UniRef90_Q285L8	Cluster: 40S ribosomal protein S3a	UniProtKB Reviewed (Swiss-Prot); UniProtKB Unreviewed (TrEMBL); UniParc	33	Nicotiana tabacum (Common tobacco); Nicotiana sylvestris (Wood tobacco); Capsicum chinense (Scotch bonnet); Solanum tuberosum (Potato); Solanum chacoense (Chaco potato); Solanum lycopersicum (Tomato); Solanum chilense (Tomato); Capsicum baccatum (Peruvian pepper); Capsicum annuum (Capsicum pepper); Nicotiana attenuata (Coyote tobacco); Daucus carota subsp. sativus (Carrot); Coffea arabica (Arabia…	261	0.9	40S ribosomal protein S3a	29717	832.803	3	29	16.8582	41.9785	29	28.4632	true	[BLASTED, MAPPED, ANNOTATED]	tr|A0A3Q7H256|A0A3Q7H256_SOLLC	40S ribosomal protein S3a OS=Solanum lycopersicum OX=4081 GN=101268112 PE=3 SV=1	261	20	0	98.4	3	P:GO:0006412; F:GO:0003735; C:GO:0022627	P:translation; F:structural constituent of ribosome; C:cytosolic small ribosomal subunit
150	A0A3Q7JAB8_SOLLC	UniRef90_M1CSI4	Cluster: 40S ribosomal protein S12	UniProtKB Unreviewed (TrEMBL); UniParc	5	Solanum tuberosum (Potato); Solanum lycopersicum (Tomato); Solanum chilense (Tomato); Solanum chacoense (Chaco potato); Solanum stenotomum	141	0.9	40S ribosomal protein S12-like	14928	806.053	3	12	32.6241	0.3848	18	22.6134	true	[BLASTED, MAPPED, ANNOTATED]	tr|A0A3Q7JAB8|A0A3Q7JAB8_SOLLC	40S ribosomal protein S12 OS=Solanum lycopersicum OX=4081 GN=101257841 PE=3 SV=1	141	20	4.89894e-97	93.35	3	P:GO:0006412; F:GO:0003735; C:GO:0022627	P:translation; F:structural constituent of ribosome; C:cytosolic small ribosomal subunit
151	A0A3Q7IQD2_SOLLC	UniRef90_A0A3Q7IQD2	Cluster: Ras-related protein RABF1	UniProtKB Unreviewed (TrEMBL); UniParc	9	Solanum lycopersicum (Tomato); Solanum chacoense (Chaco potato); Capsicum annuum (Capsicum pepper); Solanum tuberosum (Potato); Petunia hybrida (Petunia); Solanum chilense (Tomato); Solanum verrucosum	200	0.9	ras-related protein RABF1	21555	662.983	3	21	21	28.1707	22	39.6717	true	[BLASTED, MAPPED, ANNOTATED]	tr|A0A3Q7IQD2|A0A3Q7IQD2_SOLLC	Uncharacterized protein OS=Solanum lycopersicum OX=4081 GN=101245117 PE=4 SV=1	200	20	8.1049e-146	96.07	9	P:GO:0006886; P:GO:0032456; P:GO:0045022; F:GO:0003924; F:GO:0005525; C:GO:0005769; C:GO:0005829; C:GO:0005886; C:GO:0010009	P:intracellular protein transport; P:endocytic recycling; P:early endosome to late endosome transport; F:GTPase activity; F:GTP binding; C:early endosome; C:cytosol; C:plasma membrane; C:cytoplasmic side of endosome membrane	EC:3.6.1	Acting on acid anhydrides
152	A0A3Q7HUQ3_SOLLC	UniRef90_P25861	Cluster: Glyceraldehyde-3-phosphate dehydrogenase, cytosolic	UniProtKB Reviewed (Swiss-Prot); UniProtKB Unreviewed (TrEMBL); UniParc	82	Antirrhinum majus (Garden snapdragon); Petunia hybrida (Petunia); Prunus dulcis (Almond); Hevea brasiliensis (Para rubber tree); Artemisia annua (Sweet wormwood); Helianthus annuus (Common sunflower); Mikania micrantha; Lactuca sativa (Garden lettuce); Daucus carota subsp. sativus (Carrot); Solanum tuberosum (Potato); Nicotiana attenuata (Coyote tobacco); Davidia involucrata (Dove tree); Nicotian…	337	0.9	glyceraldehyde-3-phosphate dehydrogenase, cytosolic	36661	600.315	3	31	8.6053	0.8908	45	31.647	true	[BLASTED, MAPPED, ANNOTATED]	tr|A0A3Q7HUQ3|A0A3Q7HUQ3_SOLLC	Glyceraldehyde-3-phosphate dehydrogenase OS=Solanum lycopersicum OX=4081 GN=101255800 PE=3 SV=1	337	20	0	98.9	6	P:GO:0006006; P:GO:0006096; F:GO:0004365; F:GO:0050661; F:GO:0051287; C:GO:0005829	P:glucose metabolic process; P:glycolytic process; F:glyceraldehyde-3-phosphate dehydrogenase (NAD+) (phosphorylating) activity; F:NADP binding; F:NAD binding; C:cytosol	EC:1.2.1.59; EC:1.2.1.12	Glyceraldehyde-3-phosphate dehydrogenase (NAD(P)(+)) (phosphorylating); Glyceraldehyde-3-phosphate dehydrogenase (phosphorylating)
153	A0A3Q7GQM4_SOLLC	UniRef90_A0A3Q7GQM4	Cluster: Elongation factor 1-gamma 2	UniProtKB Unreviewed (TrEMBL); UniParc	27	Solanum lycopersicum (Tomato); Capsicum annuum (Capsicum pepper); Capsicum baccatum (Peruvian pepper); Solanum tuberosum (Potato); Solanum chilense (Tomato); Solanum chacoense (Chaco potato); Solanum verrucosum; Solanum pennellii; Solanum stenotomum; Escherichia coli	413	0.9	elongation factor 1-gamma 2-like isoform X1	47022	597.662	3	37	13.0751	13.1404	48	36.0423	true	[BLASTED, MAPPED, ANNOTATED]	tr|A0A3Q7GQM4|A0A3Q7GQM4_SOLLC	Uncharacterized protein OS=Solanum lycopersicum OX=4081 GN=101248107 PE=4 SV=1	413	20	0	96.03	4	P:GO:0006414; P:GO:0006749; F:GO:0003746; F:GO:0004364	P:translational elongation; P:glutathione metabolic process; F:translation elongation factor activity; F:glutathione transferase activity	EC:2.5.1.18	Glutathione transferase
154	A0A3Q7FNP2_SOLLC	UniRef90_A0A6N2BHF1	Cluster: PLAT domain-containing protein	UniProtKB Unreviewed (TrEMBL); UniParc	6	Solanum chilense (Tomato); Solanum lycopersicum (Tomato); Solanum tuberosum (Potato); Solanum pennellii; Solanum stenotomum; Solanum verrucosum	179	0.9	PLAT domain-containing protein 3-like	21207	572.483	3	15	15.0259	0.9016	20	23.437	true	[BLASTED, MAPPED]	tr|A0A3Q7FNP2|A0A3Q7FNP2_SOLLC	PLAT domain-containing protein OS=Solanum lycopersicum OX=4081 PE=4 SV=1	193	20	1.17327e-141	87.57	1	C:GO:0005737	C:cytoplasm
155	A0A3Q7G5P1_SOLLC	UniRef90_A0A3Q7G7F0	Cluster: S5 DRBM domain-containing protein	UniProtKB Unreviewed (TrEMBL); UniParc	29	Solanum lycopersicum (Tomato); Solanum chilense (Tomato); Nicotiana sylvestris (Wood tobacco); Nicotiana tabacum (Common tobacco); Solanum chacoense (Chaco potato); Solanum tuberosum (Potato); Nicotiana attenuata (Coyote tobacco); Capsicum annuum (Capsicum pepper); Capsicum chinense (Scotch bonnet); Capsicum baccatum (Peruvian pepper); Handroanthus impetiginosus; Sesamum indicum (Oriental sesame)…	280	0.9	40S ribosomal protein S2-3-like	30557	504.123	3	29	12.8571	0.9744	31	25.707	true	[BLASTED, MAPPED, ANNOTATED]	tr|A0A3Q7G5P1|A0A3Q7G5P1_SOLLC	S5 DRBM domain-containing protein OS=Solanum lycopersicum OX=4081 GN=101254082 PE=3 SV=1	280	20	0	98.35	4	P:GO:0006412; F:GO:0003723; F:GO:0003735; C:GO:0022627	P:translation; F:RNA binding; F:structural constituent of ribosome; C:cytosolic small ribosomal subunit
156	A0A3Q7FTS1_SOLLC	UniRef90_A0A3Q7FTS1	Cluster: 40S ribosomal protein S19-3	UniProtKB Unreviewed (TrEMBL); UniParc	30	Solanum lycopersicum (Tomato); Solanum chilense (Tomato); Solanum chacoense (Chaco potato); Solanum habrochaites (Wild tomato); Solanum chmielewskii; Solanum pimpinellifolium (Currant tomato); Solanum peruvianum (Peruvian tomato); Solanum tuberosum (Potato); Nicotiana tabacum (Common tobacco); Nicotiana attenuata (Coyote tobacco); Nicotiana sylvestris (Wood tobacco); Capsicum baccatum (Peruvian p…	143	0.9	40S ribosomal protein S19-3	16058	477.072	3	18	22.3776	0.5867	17	16.6622	true	[BLASTED, MAPPED, ANNOTATED]	tr|A0A3Q7FTS1|A0A3Q7FTS1_SOLLC	Uncharacterized protein OS=Solanum lycopersicum OX=4081 GN=101249905 PE=3 SV=1	143	20	6.1421e-102	96.8	5	P:GO:0000028; P:GO:0006412; F:GO:0003723; F:GO:0003735; C:GO:0022627	P:ribosomal small subunit assembly; P:translation; F:RNA binding; F:structural constituent of ribosome; C:cytosolic small ribosomal subunit
157	Q9FT17_SOLLC	UniRef90_Q9FT17	Cluster: Lipoxygenase	UniProtKB Unreviewed (TrEMBL); UniParc	6	Solanum lycopersicum (Tomato); Solanum verrucosum; Solanum tuberosum; Solanum stenotomum; Solanum pennellii	862	0.9	probable linoleate 9S-lipoxygenase 5	97444	427.36	3	85	1.9722	38.1919	48	35.1875	true	[BLASTED, MAPPED, ANNOTATED]	tr|Q9FT17|Q9FT17_SOLLC	Lipoxygenase OS=Solanum lycopersicum OX=4081 PE=2 SV=1	862	20	0	95.33	5	P:GO:0006633; P:GO:0031408; P:GO:0034440; F:GO:0016702; F:GO:0046872	P:fatty acid biosynthetic process; P:oxylipin biosynthetic process; P:lipid oxidation; F:oxidoreductase activity, acting on single donors with incorporation of molecular oxygen, incorporation of two atoms of oxygen; F:metal ion binding	EC:1.13.11	Acting on single donors with incorporation of molecular oxygen (oxygenases). The oxygen incorporated need not be derived from O(2)
158	A0A3Q7HNP1_SOLLC	UniRef90_M1AKN6	Cluster: Phospholipase D	UniProtKB Unreviewed (TrEMBL); UniParc	14	Solanum tuberosum (Potato); Solanum lycopersicum (Tomato); Solanum chilense (Tomato); Capsicum annuum (Capsicum pepper); Solanum pennellii; Solanum verrucosum; Solanum stenotomum	807	0.9	phospholipase D alpha 1-like	90462	354.864	3	76	4.1509	6.7916	63	35.0422	true	[BLASTED, MAPPED, ANNOTATED]	tr|A0A3Q7HNP1|A0A3Q7HNP1_SOLLC	Phospholipase D OS=Solanum lycopersicum OX=4081 PE=3 SV=1	795	20	0	95.65	6	P:GO:0009395; P:GO:0046470; F:GO:0004630; F:GO:0005509; F:GO:0070290; C:GO:0005886	P:phospholipid catabolic process; P:phosphatidylcholine metabolic process; F:phospholipase D activity; F:calcium ion binding; F:N-acylphosphatidylethanolamine-specific phospholipase D activity; C:plasma membrane	EC:3.1.4.4; EC:3.1.1	Phospholipase D; Acting on ester bonds
159	A0A3Q7HIP9_SOLLC	UniRef90_A0A3Q7HIP9	Cluster: Protein disulfide-isomerase	UniProtKB Unreviewed (TrEMBL); UniParc	2	Solanum lycopersicum (Tomato)	1327	0.9	ATP-dependent zinc metalloprotease FTSH 9, chloroplastic	145992	274.368	3	116	4.3708	26.2982	57	35.1126	true	[BLASTED, MAPPED, ANNOTATED]	tr|A0A3Q7HIP9|A0A3Q7HIP9_SOLLC	Protein disulfide-isomerase OS=Solanum lycopersicum OX=4081 PE=3 SV=1	1327	20	0	82.92	9	P:GO:0006508; F:GO:0003756; F:GO:0004176; F:GO:0004222; F:GO:0005524; F:GO:0008270; C:GO:0005788; C:GO:0009534; C:GO:0016021	P:proteolysis; F:protein disulfide isomerase activity; F:ATP-dependent peptidase activity; F:metalloendopeptidase activity; F:ATP binding; F:zinc ion binding; C:endoplasmic reticulum lumen; C:chloroplast thylakoid; C:integral component of membrane	EC:5.3.4.1; EC:3.4.24	Protein disulfide-isomerase; Acting on peptide bonds (peptidases)
160	B1N678_SOLLC	UniRef90_A0A6N2ARA6	Cluster: Knot1 domain-containing protein	UniProtKB Unreviewed (TrEMBL); UniParc	12	Solanum chilense (Tomato); Solanum lycopersicum (Tomato); Solanum lycopersicum var. cerasiforme; Solanum pimpinellifolium (Currant tomato); Solanum tuberosum (Potato); Solanum chacoense (Chaco potato); Solanum pennellii; Solanum stenotomum; Solanum verrucosum	76	0.9	Defensin-like protein	8439	42832.9	2	6	31.5789	0.8283	47	3.0439	true	[BLASTED, MAPPED, ANNOTATED]	tr|B1N678|B1N678_SOLLC	Defensin protein OS=Solanum lycopersicum OX=4081 GN=543741 PE=4 SV=1	76	20	1.72921e-47	92.17	1	P:GO:0006952	P:defense response
161	Q7M1T1_SOLLC	UniRef90_A0A3Q7HTE7	Cluster: AAI domain-containing protein	UniProtKB Unreviewed (TrEMBL); UniParc	8	Solanum lycopersicum (Tomato); Solanum chilense (Tomato); Solanum stenotomum; Solanum tuberosum; Solanum pennellii	144	0.9	2S sulfur-rich seed storage protein 2	3942	2839.14	2	3	75	0.9548	19	10.035	true	[BLASTED, MAPPED, ANNOTATED]	tr|Q7M1T1|Q7M1T1_SOLLC	Seed storage protein Lec2SA1 small chain (Fragment) OS=Solanum lycopersicum OX=4081 PE=1 SV=1	32	3	5.85731e-10	98.96	1	F:GO:0045735	F:nutrient reservoir activity
162	A0A494G9I5_SOLLC	UniRef90_A0A494G9I5	Cluster: Bet_v_1 domain-containing protein	UniProtKB Unreviewed (TrEMBL)	1	Solanum lycopersicum (Tomato)	146	0.9	kirola-like	16555	2414.66	2	11	18.4932	0.6244	24	18.4542	true	[BLASTED, MAPPED, ANNOTATED]	tr|A0A494G9I5|A0A494G9I5_SOLLC	Bet_v_1 domain-containing protein OS=Solanum lycopersicum OX=4081 PE=4 SV=1	146	20	7.15112e-101	82.59	1	P:GO:0006952	P:defense response
163	A0A3Q7H399_SOLLC	UniRef90_A0A3Q7H399	Cluster: TerB domain-containing protein	UniProtKB Unreviewed (TrEMBL)	1	Solanum lycopersicum (Tomato)	95	0.9	60S acidic ribosomal protein P2	10348	1857.23	2	10	22.1053	0.1864	17	26.5766	true	[BLASTED, MAPPED, ANNOTATED]	tr|A0A3Q7H399|A0A3Q7H399_SOLLC	Uncharacterized protein OS=Solanum lycopersicum OX=4081 PE=3 SV=1	95	20	1.78952e-31	79.7	4	P:GO:0002182; F:GO:0003735; C:GO:0016021; C:GO:0022625	P:cytoplasmic translational elongation; F:structural constituent of ribosome; C:integral component of membrane; C:cytosolic large ribosomal subunit
164	A0A3Q7JQE3_SOLLC	UniRef90_A0A3Q7JQE3	Cluster: EF1_GNE domain-containing protein	UniProtKB Unreviewed (TrEMBL); UniParc	18	Solanum lycopersicum (Tomato); Solanum demissum (Wild potato); Solanum chacoense (Chaco potato); Solanum tuberosum (Potato); Capsicum baccatum (Peruvian pepper); Capsicum chinense (Scotch bonnet); Capsicum annuum (Capsicum pepper); Nicotiana tabacum (Common tobacco); Nicotiana sylvestris (Wood tobacco); Nicotiana attenuata (Coyote tobacco); Solanum chilense (Tomato); Solanum verrucosum; Solanum p…	227	0.9	Elongation factor 1-beta	24505	943.754	2	21	12.3348	25.8832	23	28.8604	true	[BLASTED, MAPPED, ANNOTATED]	tr|A0A3Q7JQE3|A0A3Q7JQE3_SOLLC	EF1_GNE domain-containing protein OS=Solanum lycopersicum OX=4081 GN=101268350 PE=3 SV=1	227	20	3.1127e-163	93.45	7	P:GO:0006414; P:GO:0050790; F:GO:0003746; F:GO:0005085; F:GO:0016740; C:GO:0005829; C:GO:0005853	P:translational elongation; P:regulation of catalytic activity; F:translation elongation factor activity; F:guanyl-nucleotide exchange factor activity; F:transferase activity; C:cytosol; C:eukaryotic translation elongation factor 1 complex	EC:2	Transferases
165	A0A3Q7HFM7_SOLLC	UniRef90_A0A3Q7HFM7	Cluster: t-SNARE coiled-coil homology domain-containing protein	UniProtKB Unreviewed (TrEMBL); UniParc	22	Solanum lycopersicum (Tomato); Nicotiana tabacum (Common tobacco); Capsicum annuum (Capsicum pepper); Nicotiana sylvestris (Wood tobacco); Petunia hybrida (Petunia); Solanum chilense (Tomato); Solanum tuberosum (Potato); Capsicum chinense (Scotch bonnet); Solanum chacoense (Chaco potato); Solanum verrucosum; Solanum stenotomum; Nicotiana attenuata	233	0.9	syntaxin-51-like isoform X2	25793	857.782	2	25	10.7296	14.6051	23	19.4433	true	[BLASTED, MAPPED, ANNOTATED]	tr|A0A3Q7HFM7|A0A3Q7HFM7_SOLLC	t-SNARE coiled-coil homology domain-containing protein OS=Solanum lycopersicum OX=4081 PE=3 SV=1	233	20	5.76119e-168	97.15	8	P:GO:0006886; P:GO:0006906; P:GO:0048278; F:GO:0000149; F:GO:0005484; C:GO:0012505; C:GO:0016021; C:GO:0031201	P:intracellular protein transport; P:vesicle fusion; P:vesicle docking; F:SNARE binding; F:SNAP receptor activity; C:endomembrane system; C:integral component of membrane; C:SNARE complex
166	Q7Y240_SOLLC	UniRef90_Q7Y240	Cluster: Glutaredoxin-dependent peroxiredoxin	UniProtKB Unreviewed (TrEMBL); UniParc	19	Solanum lycopersicum (Tomato); Solanum chacoense (Chaco potato); Phanerochaete pseudomagnoliae; Nicotiana tabacum (Common tobacco); Capsicum annuum (Capsicum pepper); Solanum chilense (Tomato); Solanum tuberosum (Potato); Nicotiana attenuata (Coyote tobacco); Capsicum baccatum (Peruvian pepper); Nicotiana benthamiana; Capsicum chinense (Scotch bonnet); Nicotiana sylvestris (Wood tobacco); Solanum…	162	0.9	thioredoxin peroxidase 1	17425	742.051	2	10	20.3704	7.5632	27	22.5525	true	[BLASTED, MAPPED, ANNOTATED]	tr|Q7Y240|Q7Y240_SOLLC	Glutaredoxin-dependent peroxiredoxin OS=Solanum lycopersicum OX=4081 GN=TPx1 PE=2 SV=1	162	20	1.13991e-114	97.5	6	P:GO:0034599; P:GO:0042744; P:GO:0045454; P:GO:0098869; F:GO:0008379; C:GO:0005737	P:cellular response to oxidative stress; P:hydrogen peroxide catabolic process; P:cell redox homeostasis; P:cellular oxidant detoxification; F:thioredoxin peroxidase activity; C:cytoplasm	EC:1.11.1.24	Thioredoxin-dependent peroxiredoxin
167	A0A3Q7IB32_SOLLC	UniRef90_A0A3Q7IB32	Cluster: WRKY domain-containing protein	UniProtKB Unreviewed (TrEMBL)	3	Solanum lycopersicum (Tomato); Solanum palustre (Non-tuber-performing potato); Solanum chilense (Tomato)	380	0.9	60S ribosomal protein L11-1-like	42879	716.865	2	27	5.5263	0.1531	17	17.2138	true	[BLASTED, MAPPED, ANNOTATED]	tr|A0A3Q7IB32|A0A3Q7IB32_SOLLC	WRKY domain-containing protein OS=Solanum lycopersicum OX=4081 PE=3 SV=1	380	20	1.65818e-147	98.64	8	P:GO:0006355; P:GO:0006412; F:GO:0000976; F:GO:0003700; F:GO:0003723; F:GO:0003735; C:GO:0005634; C:GO:0022625	P:regulation of transcription, DNA-templated; P:translation; F:transcription cis-regulatory region binding; F:DNA-binding transcription factor activity; F:RNA binding; F:structural constituent of ribosome; C:nucleus; C:cytosolic large ribosomal subunit
168	A0A3Q7HVU3_SOLLC	UniRef90_A0A3Q7HVU3	Cluster: Interactor of constitutive active ROPs 2, chloroplastic	UniProtKB Unreviewed (TrEMBL); UniParc	8	Solanum lycopersicum (Tomato); Solanum chilense (Tomato); Solanum tuberosum (Potato); Solanum verrucosum; Solanum stenotomum; Solanum pennellii	753	0.9	interactor of constitutive active ROPs 2, chloroplastic-like	84149	699.597	2	84	5.0465	11.5195	30	37.1265	true	[BLASTED, MAPPED, ANNOTATED]	tr|A0A3Q7HVU3|A0A3Q7HVU3_SOLLC	Uncharacterized protein OS=Solanum lycopersicum OX=4081 PE=3 SV=1	753	20	0	89.86	7	P:GO:0006412; P:GO:0015031; F:GO:0003735; F:GO:0035091; F:GO:0043130; F:GO:0051219; C:GO:0015935	P:translation; P:protein transport; F:structural constituent of ribosome; F:phosphatidylinositol binding; F:ubiquitin binding; F:phosphoprotein binding; C:small ribosomal subunit
169	A0A3Q7INF3_SOLLC	UniRef90_A0A3Q7INF3	Cluster: DUF4005 domain-containing protein	UniProtKB Unreviewed (TrEMBL); UniParc	19	Solanum lycopersicum (Tomato); Picea mariana (Black spruce); Nymphaea colorata; Oryza sativa subsp. japonica (Rice); Coffea canephora (Robusta coffee); Ceratodon purpureus (Fire moss); Trichodon cylindricus; Capsicum annuum (Capsicum pepper); Daucus carota subsp. sativus (Carrot); Rhamnella rubrinervis; Papaver somniferum (Opium poppy); Rhodamnia argentea; Solanum chacoense (Chaco potato); Citrus…	1263	0.9	interactor of constitutive active ROPs 2, chloroplastic-like isoform X2	140775	692.451	2	145	3.0087	12.8179	32	37.2518	true	[BLASTED, MAPPED, ANNOTATED]	tr|A0A3Q7INF3|A0A3Q7INF3_SOLLC	Uncharacterized protein OS=Solanum lycopersicum OX=4081 PE=3 SV=1	1263	20	0	92.92	6	P:GO:0006412; P:GO:0015031; F:GO:0003735; F:GO:0035091; F:GO:0043130; C:GO:0015935	P:translation; P:protein transport; F:structural constituent of ribosome; F:phosphatidylinositol binding; F:ubiquitin binding; C:small ribosomal subunit
170	A0A3Q7IQR8_SOLLC	UniRef90_A0A3Q7IQR8	Cluster: Ras-related protein RABA4a	UniProtKB Unreviewed (TrEMBL); UniParc	17	Solanum lycopersicum (Tomato); Nicotiana tabacum (Common tobacco); Nicotiana sylvestris (Wood tobacco); Solanum tuberosum (Potato); Solanum chacoense (Chaco potato); Capsicum baccatum (Peruvian pepper); Capsicum chinense (Scotch bonnet); Capsicum annuum (Capsicum pepper); Nicotiana attenuata (Coyote tobacco); Solanum verrucosum; Solanum stenotomum	224	0.9	ras-related protein Rab11D	24557	605.374	2	26	9.8214	0.2428	18	30.2133	true	[BLASTED, MAPPED, ANNOTATED]	tr|A0A3Q7IQR8|A0A3Q7IQR8_SOLLC	Uncharacterized protein OS=Solanum lycopersicum OX=4081 GN=101260785 PE=4 SV=1	224	20	8.22716e-165	98.6	5	F:GO:0003924; F:GO:0005525; C:GO:0005768; C:GO:0005794; C:GO:0005886	F:GTPase activity; F:GTP binding; C:endosome; C:Golgi apparatus; C:plasma membrane	EC:3.6.1	Acting on acid anhydrides
171	A0A3Q7IUI9_SOLLC	UniRef90_A0A3Q7GQM4	Cluster: Elongation factor 1-gamma 2	UniProtKB Unreviewed (TrEMBL); UniParc	27	Solanum lycopersicum (Tomato); Capsicum annuum (Capsicum pepper); Capsicum baccatum (Peruvian pepper); Solanum tuberosum (Potato); Solanum chilense (Tomato); Solanum chacoense (Chaco potato); Solanum verrucosum; Solanum pennellii; Solanum stenotomum; Escherichia coli	413	0.9	elongation factor 1-gamma 2-like	47305	598.276	2	41	4.5894	28.18	61	35.8817	true	[BLASTED, MAPPED, ANNOTATED]	tr|A0A3Q7IUI9|A0A3Q7IUI9_SOLLC	Uncharacterized protein OS=Solanum lycopersicum OX=4081 GN=101249702 PE=4 SV=1	414	20	0	94.34	4	P:GO:0006414; P:GO:0006749; F:GO:0003746; F:GO:0004364	P:translational elongation; P:glutathione metabolic process; F:translation elongation factor activity; F:glutathione transferase activity	EC:2.5.1.18	Glutathione transferase
172	A0A3Q7FS97_SOLLC	UniRef90_M1BCZ9	Cluster: Lactoylglutathione lyase	UniProtKB Unreviewed (TrEMBL); UniParc	11	Solanum tuberosum (Potato); Solanum chacoense (Chaco potato); Capsicum annuum (Capsicum pepper); Capsicum baccatum (Peruvian pepper); Capsicum chinense (Scotch bonnet); Solanum chilense (Tomato); Solanum lycopersicum (Tomato); Solanum pennellii; Solanum verrucosum; Solanum stenotomum	292	0.9	putative lactoylglutathione lyase	32838	513.686	2	36	10.5802	4.7492	39	36.6842	true	[BLASTED, MAPPED, ANNOTATED]	tr|A0A3Q7FS97|A0A3Q7FS97_SOLLC	Lactoylglutathione lyase OS=Solanum lycopersicum OX=4081 PE=3 SV=1	293	20	0	95.77	4	P:GO:0019243; F:GO:0004462; F:GO:0046872; C:GO:0005737	P:methylglyoxal catabolic process to D-lactate via S-lactoyl-glutathione; F:lactoylglutathione lyase activity; F:metal ion binding; C:cytoplasm	EC:4.4.1.5	Lactoylglutathione lyase
173	A0A3Q7GZX3_SOLLC	UniRef90_A0A3Q7GZX3	Cluster: 60S ribosomal protein L9	UniProtKB Unreviewed (TrEMBL); UniParc	43	Solanum lycopersicum (Tomato); Solanum chilense (Tomato); Nicotiana attenuata (Coyote tobacco); Nicotiana tabacum (Common tobacco); Nicotiana sylvestris (Wood tobacco); Solanum tuberosum (Potato); Capsicum annuum (Capsicum pepper); Cuscuta campestris; Capsicum chinense (Scotch bonnet); Capsicum baccatum (Peruvian pepper); Solanum chacoense (Chaco potato); Rhodamnia argentea; Cuscuta australis; Co…	194	0.9	60S ribosomal protein L9-1-like	21916	512.029	2	18	12.8866	7.3932	26	24.5515	true	[BLASTED, MAPPED, ANNOTATED]	tr|A0A3Q7GZX3|A0A3Q7GZX3_SOLLC	Uncharacterized protein OS=Solanum lycopersicum OX=4081 GN=101251592 PE=3 SV=1	194	20	1.67976e-137	97.58	4	P:GO:0002181; F:GO:0003735; F:GO:0019843; C:GO:0022625	P:cytoplasmic translation; F:structural constituent of ribosome; F:rRNA binding; C:cytosolic large ribosomal subunit
174	A0A3Q7HRU7_SOLLC	UniRef90_A0A6N2BUN4	Cluster: 11-beta-hydroxysteroid dehydrogenase-like 5	UniProtKB Unreviewed (TrEMBL); UniParc	11	Solanum chilense (Tomato); Solanum lycopersicum (Tomato); Capsicum annuum (Capsicum pepper); Capsicum baccatum (Peruvian pepper); Capsicum chinense (Scotch bonnet); Nicotiana tabacum (Common tobacco); Solanum tuberosum; Solanum stenotomum; Solanum verrucosum; Solanum pennellii	384	0.9	11-beta-hydroxysteroid dehydrogenase-like 5	44704	490.756	2	35	5.5138	2.8796	39	32.4278	true	[BLASTED, MAPPED, ANNOTATED]	tr|A0A3Q7HRU7|A0A3Q7HRU7_SOLLC	Uncharacterized protein OS=Solanum lycopersicum OX=4081 PE=4 SV=1	399	20	0	88.56	4	F:GO:0070524; F:GO:0072582; C:GO:0005811; C:GO:0016021	F:11-beta-hydroxysteroid dehydrogenase (NADP+) activity; F:17-beta-hydroxysteroid dehydrogenase (NADP+) activity; C:lipid droplet; C:integral component of membrane	EC:1.1.1.146; EC:1.1.1.62	11-beta-hydroxysteroid dehydrogenase; 17-beta-estradiol 17-dehydrogenase
175	A0A3Q7IJE5_SOLLC	UniRef90_A0A3Q7IJE5	Cluster: NAC-A/B domain-containing protein	UniProtKB Unreviewed (TrEMBL)	2	Solanum lycopersicum (Tomato); Solanum chacoense (Chaco potato)	163	0.9	nascent polypeptide-associated complex subunit alpha-like protein 1	17548	428.132	2	11	18.4049	0.1772	18	34.5441	true	[BLASTED, MAPPED, ANNOTATED]	tr|A0A3Q7IJE5|A0A3Q7IJE5_SOLLC	NAC-A/B domain-containing protein OS=Solanum lycopersicum OX=4081 PE=4 SV=1	163	20	5.42861e-102	97.51	3	P:GO:0006612; F:GO:0051082; C:GO:0005854	P:protein targeting to membrane; F:unfolded protein binding; C:nascent polypeptide-associated complex
176	A0A3Q7GFL6_SOLLC	UniRef90_A0A3Q7GFL6	Cluster: SHSP domain-containing protein	UniProtKB Unreviewed (TrEMBL); UniParc	11	Solanum lycopersicum (Tomato); Solanum tuberosum (Potato); Solanum chilense (Tomato); Solanum pennellii; Solanum verrucosum; Solanum stenotomum	225	0.9	small heat shock protein, chloroplastic-like	26153	378.157	2	27	9.3333	0.5383	19	39.8591	true	[BLASTED, MAPPED, ANNOTATED]	tr|A0A3Q7GFL6|A0A3Q7GFL6_SOLLC	SHSP domain-containing protein OS=Solanum lycopersicum OX=4081 PE=3 SV=1	225	20	9.25352e-167	86.42	1	P:GO:0009408	P:response to heat
177	A0A3Q7IXT2_SOLLC	UniRef90_A0A3Q7IXT2	Cluster: Protein kinase domain-containing protein	UniProtKB Unreviewed (TrEMBL); UniParc	14	Solanum lycopersicum (Tomato); Nicotiana sylvestris (Wood tobacco); Nicotiana tabacum (Common tobacco); Solanum chilense (Tomato); Nicotiana attenuata (Coyote tobacco); Solanum tuberosum (Potato); Capsicum chinense (Scotch bonnet); Solanum chacoense (Chaco potato); Capsicum annuum (Capsicum pepper); Capsicum baccatum (Peruvian pepper); Solanum verrucosum; Solanum pennellii; Nicotiana tomentosifor…	487	0.9	probable serine/threonine-protein kinase At5g41260	54638	366.563	2	48	4.3121	11.531	30	32.9981	true	[BLASTED, MAPPED, ANNOTATED]	tr|A0A3Q7IXT2|A0A3Q7IXT2_SOLLC	Protein kinase domain-containing protein OS=Solanum lycopersicum OX=4081 GN=543567 PE=3 SV=1	487	20	0	96.49	6	P:GO:0006468; P:GO:0009742; F:GO:0004674; F:GO:0005524; F:GO:0106310; C:GO:0005886	P:protein phosphorylation; P:brassinosteroid mediated signaling pathway; F:protein serine/threonine kinase activity; F:ATP binding; F:protein serine kinase activity; C:plasma membrane	EC:2.7.11.1	Non-specific serine/threonine protein kinase
178	A0A3Q7G7V0_SOLLC	UniRef90_A0A3Q7G7V0	Cluster: Usp domain-containing protein	UniProtKB Unreviewed (TrEMBL); UniParc	17	Solanum lycopersicum (Tomato); Capsicum baccatum (Peruvian pepper); Capsicum chinense (Scotch bonnet); Capsicum annuum (Capsicum pepper); Solanum chilense (Tomato); Nicotiana sylvestris (Wood tobacco); Nicotiana tabacum (Common tobacco); Solanum chacoense (Chaco potato); Solanum tuberosum (Potato); Nicotiana attenuata (Coyote tobacco); Solanum stenotomum; Solanum pennellii; Solanum verrucosum	170	0.9	universal stress protein A-like protein	18026	354.948	2	11	14.1176	0.0827	17	28.1646	true	[BLASTED, MAPPED, ANNOTATED]	tr|A0A3Q7G7V0|A0A3Q7G7V0_SOLLC	Usp domain-containing protein OS=Solanum lycopersicum OX=4081 PE=4 SV=1	170	20	2.35414e-121	92.84	1	F:GO:0016787	F:hydrolase activity	EC:3	Hydrolases
179	Q9SMD3_SOLLC	UniRef90_Q52QQ4	Cluster: Ascorbate peroxidase	UniProtKB Unreviewed (TrEMBL); UniParc	43	Solanum lycopersicum (Tomato); Capsicum annuum (Capsicum pepper); Capsicum chinense (Scotch bonnet); Coffea canephora (Robusta coffee); Coffea arabica x Coffea canephora; Solanum chacoense (Chaco potato); Picrorhiza kurrooa; Lycium chinense (Chinese wolfberry); Solanum chilense (Tomato); Solanum tuberosum (Potato); Coffea arabica (Arabian coffee); Sesamum indicum (Oriental sesame); Nicotiana sylv…	250	0.9	ascorbate peroxidase	27446	347.985	2	21	9.6	1.2265	22	30.0415	true	[BLASTED, MAPPED, ANNOTATED]	tr|Q9SMD3|Q9SMD3_SOLLC	Ascorbate peroxidase OS=Solanum lycopersicum OX=4081 GN=Apx PE=3 SV=1	250	20	0	96.94	9	P:GO:0000302; P:GO:0034599; P:GO:0042744; P:GO:0098869; F:GO:0016688; F:GO:0020037; F:GO:0046872; C:GO:0005576; C:GO:0009507	P:response to reactive oxygen species; P:cellular response to oxidative stress; P:hydrogen peroxide catabolic process; P:cellular oxidant detoxification; F:L-ascorbate peroxidase activity; F:heme binding; F:metal ion binding; C:extracellular region; C:chloroplast	EC:1.11.1.11	L-ascorbate peroxidase
180	A0A3Q7HGM6_SOLLC	UniRef90_A0A3Q7HGM6	Cluster: phosphoenolpyruvate carboxylase	UniProtKB Unreviewed (TrEMBL); UniParc	9	Solanum lycopersicum (Tomato); Capsicum annuum (Capsicum pepper); Capsicum baccatum (Peruvian pepper); Capsicum chinense (Scotch bonnet); Solanum chilense (Tomato); Solanum pennellii	964	0.9	phosphoenolpyruvate carboxylase-like	110292	333.171	2	95	2.9046	2.7059	102	33.4422	true	[BLASTED, MAPPED, ANNOTATED]	tr|A0A3Q7HGM6|A0A3Q7HGM6_SOLLC	Phosphoenolpyruvate carboxylase OS=Solanum lycopersicum OX=4081 GN=101267723 PE=3 SV=1	964	20	0	97.17	7	P:GO:0006099; P:GO:0015977; P:GO:0048366; F:GO:0008964; C:GO:0005829; C:GO:0009507; C:GO:0048046	P:tricarboxylic acid cycle; P:carbon fixation; P:leaf development; F:phosphoenolpyruvate carboxylase activity; C:cytosol; C:chloroplast; C:apoplast	EC:4.1.1.31; EC:4.1.1.32	Phosphoenolpyruvate carboxylase; Phosphoenolpyruvate carboxykinase (GTP)
181	U73C4_SOLLC	UniRef90_K4D422	Cluster: UDP-glycosyltransferase 73C4	UniProtKB Reviewed (Swiss-Prot); UniProtKB Unreviewed (TrEMBL); UniParc	6	Solanum lycopersicum (Tomato); Solanum tuberosum (Potato); Solanum chilense (Tomato); Solanum verrucosum; Solanum pennellii	344	0.9	UDP-glycosyltransferase 73C3-like	39487	321.533	2	29	5.2326	25.1071	25	32.3438	true	[BLASTED, MAPPED, ANNOTATED]	sp|K4D422|U73C4_SOLLC	UDP-glycosyltransferase 73C4 OS=Solanum lycopersicum OX=4081 GN=UGT73C4 PE=2 SV=1	344	20	0	92.99	3	F:GO:0008194; C:GO:0005634; C:GO:0005737	F:UDP-glycosyltransferase activity; C:nucleus; C:cytoplasm	EC:2.4	Glycosyltransferases
182	A0A3Q7HV43_SOLLC	UniRef90_A0A1J6J538	Cluster: Hsp70-hsp90 organizing protein 2	UniProtKB Unreviewed (TrEMBL); UniParc	12	Nicotiana attenuata (Coyote tobacco); Solanum chacoense (Chaco potato); Solanum chilense (Tomato); Solanum lycopersicum (Tomato); Solanum tuberosum (Potato); Nicotiana sylvestris (Wood tobacco); Nicotiana tabacum (Common tobacco); Solanum verrucosum; Solanum pennellii; Solanum stenotomum; Nicotiana tomentosiformis	576	0.9	hsp70-Hsp90 organizing protein 3-like	65124	306.715	2	70	3.7997	30.9414	44	40.2396	true	[BLASTED, MAPPED, ANNOTATED]	tr|A0A3Q7HV43|A0A3Q7HV43_SOLLC	Uncharacterized protein OS=Solanum lycopersicum OX=4081 PE=4 SV=1	579	20	0	94.17	1	F:GO:0051879	F:Hsp90 protein binding
183	A0A3Q7J082_SOLLC	UniRef90_Q96372	Cluster: Cell division cycle protein 48 homolog	UniProtKB Reviewed (Swiss-Prot); UniProtKB Unreviewed (TrEMBL); UniParc	60	Capsicum annuum (Capsicum pepper); Salvia splendens (Scarlet sage); Nicotiana attenuata (Coyote tobacco); Nicotiana tabacum (Common tobacco); Nicotiana sylvestris (Wood tobacco); Solanum lycopersicum (Tomato); Erythranthe guttata (Yellow monkey flower); Phtheirospermum japonicum; Capsicum baccatum (Peruvian pepper); Capsicum chinense (Scotch bonnet); Solanum chacoense (Chaco potato); Coffea canep…	805	0.9	cell division cycle protein 48 homolog	89511	292.329	2	73	2.1118	25.4676	72	34.8283	true	[BLASTED, MAPPED, ANNOTATED]	tr|A0A3Q7J082|A0A3Q7J082_SOLLC	Uncharacterized protein OS=Solanum lycopersicum OX=4081 GN=101265798 PE=4 SV=1	805	20	0	98.9	12	P:GO:0030433; P:GO:0030970; P:GO:0051228; P:GO:0051301; P:GO:0071712; P:GO:0097352; F:GO:0005524; F:GO:0016787; F:GO:0031593; C:GO:0005634; C:GO:0005829; C:GO:0034098	P:ubiquitin-dependent ERAD pathway; P:retrograde protein transport, ER to cytosol; P:mitotic spindle disassembly; P:cell division; P:ER-associated misfolded protein catabolic process; P:autophagosome maturation; F:ATP binding; F:hydrolase activity; F:polyubiquitin modification-dependent protein binding; C:nucleus; C:cytosol; C:VCP-NPL4-UFD1 AAA ATPase complex	EC:3	Hydrolases
184	A0A3Q7EUT2_SOLLC	UniRef90_A0A3Q7EUT2	Cluster: Flavin-containing monooxygenase	UniProtKB Unreviewed (TrEMBL); UniParc	5	Solanum lycopersicum (Tomato); Solanum chilense (Tomato); Solanum verrucosum; Solanum tuberosum; Solanum pennellii	510	0.9	probable flavin-containing monooxygenase 1	58167	287.454	2	38	5.6863	6.7041	31	27.7643	true	[BLASTED, MAPPED, ANNOTATED]	tr|A0A3Q7EUT2|A0A3Q7EUT2_SOLLC	Flavin-containing monooxygenase OS=Solanum lycopersicum OX=4081 GN=101254042 PE=3 SV=1	510	20	0	92.68	4	F:GO:0004499; F:GO:0050660; F:GO:0050661; C:GO:0016021	F:N,N-dimethylaniline monooxygenase activity; F:flavin adenine dinucleotide binding; F:NADP binding; C:integral component of membrane	EC:1.14.13.8	Flavin-containing monooxygenase

## Sheet: D) F3
N	Entry	Accession	Cluster ID in UniRef	Cluster Name	Types	Size	Organisms		Description Blast OmicsBox	Mw (Da)	PLGS Score	Peptides	Theoretical Peptides	Coverage (%)	Precursor RMS Mass Error (ppm)	Products	Products RMS Mass Error (ppm)		Tags	SeqName	Description UniProt	Length	#Hits	e-Value	sim mean	#GO	GO IDs	GO Names	Enzyme Codes	Enzyme Names
1	Q84XW6_SOLLC	UniRef90_M1CTC4	Cluster: V-type proton ATPase catalytic subunit A	UniProtKB Unreviewed (TrEMBL); UniParc	28	Solanum tuberosum (Potato); Malus baccata (Siberian crab apple); Rhaphiolepis bibas; Cicer arietinum (Chickpea); Medicago truncatula (Barrel medic); Trifolium pratense (Red clover); Trifolium medium; Cucurbita maxima (Pumpkin); Cucumis sativus (Cucumber); Cucumis melo var. makuwa; Cucumis melo (Muskmelon); Prunus avium (Cherry); Cucurbita moschata (Winter crookneck squash); Solanum lycopersicum (…	623	0.9	V-type proton ATPase catalytic subunit A	68526	57992.4	36	64	63.7239	2.1423	821	23.4165	true	[BLASTED, MAPPED, ANNOTATED]	tr|Q84XW6|Q84XW6_SOLLC	V-ATPase 69 kDa subunit OS=Solanum lycopersicum OX=4081 PE=2 SV=1	623	20	0	98.78	7	P:GO:0015986; F:GO:0005524; F:GO:0046933; F:GO:0046961; C:GO:0000325; C:GO:0009507; C:GO:0033180	P:ATP synthesis coupled proton transport; F:ATP binding; F:proton-transporting ATP synthase activity, rotational mechanism; F:proton-transporting ATPase activity, rotational mechanism; C:plant-type vacuole; C:chloroplast; C:proton-transporting V-type ATPase, V1 domain	EC:7.1.3.1; EC:7.1.2.2; EC:6	H(+)-exporting diphosphatase; H(+)-transporting two-sector ATPase; Ligases
2	B0JEU3_SOLLC	UniRef90_A0A6N2BP58	Cluster: Vicilin GC72-A	UniProtKB Unreviewed (TrEMBL); UniParc	7	Solanum chilense (Tomato); Solanum lycopersicum (Tomato); Solanum tuberosum (Potato); Solanum pennellii; Solanum verrucosum; Solanum stenotomum	569	0.9	vicilin-like antimicrobial peptides 2-3	66137	48286.1	20	62	45.5185	3.5342	438	20.31	true	[BLASTED]	tr|B0JEU3|B0JEU3_SOLLC	Vicilin OS=Solanum lycopersicum OX=4081 GN=vicilin PE=1 SV=1	569	20	0	87.09
3	A0A3Q7IIS5_SOLLC	UniRef90_A0A3Q7IIS5	Cluster: Vacuolar proton pump subunit B	UniProtKB Unreviewed (TrEMBL)	5	Solanum lycopersicum (Tomato); Solanum tuberosum (Potato); Solanum chacoense (Chaco potato); Solanum chilense (Tomato)	489	0.9	V-type proton ATPase subunit B2	54474	44176.9	25	45	62.9857	1.0751	574	20.9271	true	[BLASTED, MAPPED, ANNOTATED]	tr|A0A3Q7IIS5|A0A3Q7IIS5_SOLLC	Vacuolar proton pump subunit B OS=Solanum lycopersicum OX=4081 PE=3 SV=1	489	20	0	98.52	8	P:GO:0006468; P:GO:0046034; P:GO:1902600; F:GO:0004674; F:GO:0005524; C:GO:0005886; C:GO:0009536; C:GO:0033180	P:protein phosphorylation; P:ATP metabolic process; P:proton transmembrane transport; F:protein serine/threonine kinase activity; F:ATP binding; C:plasma membrane; C:plastid; C:proton-transporting V-type ATPase, V1 domain	EC:2.7.1	Transferring phosphorus-containing groups
4	A0A3Q7FJJ3_SOLLC	UniRef90_P53492	Cluster: Actin-7	UniProtKB Reviewed (Swiss-Prot); UniProtKB Unreviewed (TrEMBL); UniParc	1381	Arabidopsis thaliana (Mouse-ear cress); Oryza sativa subsp. indica (Rice); Oryza sativa subsp. japonica (Rice); Solanum tuberosum (Potato); Arabidopsis suecica (Swedish thale-cress); Arabidopsis thaliana x Arabidopsis arenosa; Arabidopsis arenosa (Sand rock-cress); Arabidopsis lyrata subsp. lyrata (Lyre-leaved rock-cress); Parthenium argentatum (Guayule rubber plant); Vitis vinifera (Grape); Prun…	377	0.9	actin-7	41730	36813.3	12	38	35.2785	2.8133	144	20.5819	true	[BLASTED, MAPPED, ANNOTATED]	tr|A0A3Q7FJJ3|A0A3Q7FJJ3_SOLLC	Uncharacterized protein OS=Solanum lycopersicum OX=4081 GN=101264601 PE=3 SV=1	377	20	0	99.88	6	P:GO:0051301; F:GO:0005524; C:GO:0005829; C:GO:0005856; C:GO:0005886; C:GO:0009506	P:cell division; F:ATP binding; C:cytosol; C:cytoskeleton; C:plasma membrane; C:plasmodesma
5	Q84XV7_SOLLC	UniRef90_O23654	Cluster: V-type proton ATPase catalytic subunit A	UniProtKB Reviewed (Swiss-Prot); UniProtKB Unreviewed (TrEMBL); UniParc	216	Arabidopsis thaliana (Mouse-ear cress); Vigna radiata var. radiata (Mung bean); Citrus unshiu (Satsuma mandarin); Arabidopsis suecica (Swedish thale-cress); Arabidopsis thaliana x Arabidopsis arenosa; Noccaea caerulescens (Alpine penny-cress); Anthurium amnicola; Nymphaea colorata; Eragrostis curvula (weeping love grass); Aquilegia coerulea (Rocky mountain columbine); Dichanthelium oligosanthes; …	623	0.9	V-type proton ATPase catalytic subunit A	68671	36451.2	34	66	50.5618	11.809	599	23.4971	true	[BLASTED, MAPPED, ANNOTATED]	tr|Q84XV7|Q84XV7_SOLLC	V-ATPase 69 kDa subunit OS=Solanum lycopersicum OX=4081 PE=2 SV=1	623	20	0	98.77	7	P:GO:0015986; F:GO:0005524; F:GO:0046933; F:GO:0046961; C:GO:0000325; C:GO:0009507; C:GO:0033180	P:ATP synthesis coupled proton transport; F:ATP binding; F:proton-transporting ATP synthase activity, rotational mechanism; F:proton-transporting ATPase activity, rotational mechanism; C:plant-type vacuole; C:chloroplast; C:proton-transporting V-type ATPase, V1 domain	EC:7.1.3.1; EC:7.1.2.2; EC:6	H(+)-exporting diphosphatase; H(+)-transporting two-sector ATPase; Ligases
6	B0ZYZ9_SOLLC	UniRef90_B0ZYZ9	Cluster: Actin (Fragment)	UniProtKB Unreviewed (TrEMBL)	1	Solanum lycopersicum (Tomato)	88	0.9	actin	10167	31720	3	12	51.1364	3.67	64	17.13	true	[BLASTED, MAPPED, ANNOTATED]	tr|B0ZYZ9|B0ZYZ9_SOLLC	Actin (Fragment) OS=Solanum lycopersicum OX=4081 PE=2 SV=1	88	20	1.27162e-57	96.59	6	P:GO:0051301; F:GO:0005524; C:GO:0005829; C:GO:0005856; C:GO:0005886; C:GO:0009506	P:cell division; F:ATP binding; C:cytosol; C:cytoskeleton; C:plasma membrane; C:plasmodesma
7	A0A3Q7IIZ3_SOLLC	UniRef90_O82013	Cluster: 17.3 kDa class II heat shock protein	UniProtKB Reviewed (Swiss-Prot); UniProtKB Unreviewed (TrEMBL); UniParc	37	Solanum peruvianum (Peruvian tomato); Solanum chacoense (Chaco potato); Capsicum annuum (Capsicum pepper); Capsicum chinense (Scotch bonnet); Capsicum baccatum (Peruvian pepper); Solanum tuberosum (Potato); Solanum lycopersicum (Tomato); Nicotiana attenuata (Coyote tobacco); Nicotiana sylvestris (Wood tobacco); Nicotiana tabacum (Common tobacco); Escherichia coli; Solanum verrucosum	155	0.9	17.3 kDa class II heat shock protein-like	17323	28254.8	4	13	30.9677	3.8737	161	17.8721	true	[BLASTED, MAPPED, ANNOTATED]	tr|A0A3Q7IIZ3|A0A3Q7IIZ3_SOLLC	SHSP domain-containing protein OS=Solanum lycopersicum OX=4081 GN=543572 PE=3 SV=1	155	20	1.9869e-109	93.97	8	P:GO:0006457; P:GO:0009408; P:GO:0009651; P:GO:0042542; P:GO:0051259; F:GO:0043621; F:GO:0051082; C:GO:0005737	P:protein folding; P:response to heat; P:response to salt stress; P:response to hydrogen peroxide; P:protein complex oligomerization; F:protein self-association; F:unfolded protein binding; C:cytoplasm
8	A0A3Q7IBA0_SOLLC	UniRef90_Q8H159	Cluster: Polyubiquitin 10	UniProtKB Reviewed (Swiss-Prot); UniProtKB Unreviewed (TrEMBL); UniParc	56	Arabidopsis thaliana (Mouse-ear cress); Nicotiana sylvestris (Wood tobacco); Prunus persica (Peach); Pisum sativum (Garden pea); Arachis duranensis (Wild peanut); Prunus armeniaca (Apricot); Arachis hypogaea (Peanut); Glycine soja (Wild soybean); Citrus clementina (Clementine); Citrus sinensis (Sweet orange); Gossypium raimondii (New World cotton); Arabidopsis thaliana x Arabidopsis arenosa; Viti…	457	0.9	polyubiquitin-like isoform X1	51174	26552.6	5	54	10.0656	0.7688	88	12.2275	true	[BLASTED, MAPPED, ANNOTATED]	tr|A0A3Q7IBA0|A0A3Q7IBA0_SOLLC	Uncharacterized protein OS=Solanum lycopersicum OX=4081 GN=101256039 PE=4 SV=1	457	20	0	99.98	19	P:GO:0006281; P:GO:0006468; P:GO:0016567; P:GO:0019941; P:GO:0090305; F:GO:0004527; F:GO:0004674; F:GO:0005524; F:GO:0008081; F:GO:0016616; F:GO:0031386; F:GO:0031625; F:GO:0051287; F:GO:0106310; C:GO:0000781; C:GO:0005634; C:GO:0005737; C:GO:0005840; C:GO:0016021	P:DNA repair; P:protein phosphorylation; P:protein ubiquitination; P:modification-dependent protein catabolic process; P:nucleic acid phosphodiester bond hydrolysis; F:exonuclease activity; F:protein serine/threonine kinase activity; F:ATP binding; F:phosphoric diester hydrolase activity; F:oxidoreductase activity, acting on the CH-OH group of donors, NAD or NADP as acceptor; F:protein tag; F:ubi…	EC:3.1.4; EC:2.7.11.1; EC:1.1.1	Acting on ester bonds; Non-specific serine/threonine protein kinase; Acting on the CH-OH group of donors
9	A0A3Q7ETC3_SOLLC	UniRef90_A0A7C9EV18	Cluster: Ras-related protein Rab7	UniProtKB Unreviewed (TrEMBL); UniParc	27	Opuntia streptacantha (Prickly pear cactus); Sesamum indicum (Oriental sesame); Solanum tuberosum (Potato); Capsicum baccatum (Peruvian pepper); Solanum chacoense (Chaco potato); Solanum lycopersicum (Tomato); Solanum chilense (Tomato); Capsicum chinense (Scotch bonnet); Capsicum annuum (Capsicum pepper); Brassica carinata (Ethiopian mustard); Brassica oleracea var. oleracea; Brassica oleracea (W…	230	0.9	Ras-related protein Rab7	22999	25519.9	11	21	63.5922	2.3697	257	24.7568	true	[BLASTED, MAPPED, ANNOTATED]	tr|A0A3Q7ETC3|A0A3Q7ETC3_SOLLC	Uncharacterized protein OS=Solanum lycopersicum OX=4081 GN=101263553 PE=4 SV=1	206	20	2.89508e-151	98.64	3	F:GO:0003924; F:GO:0005525; C:GO:0005774	F:GTPase activity; F:GTP binding; C:vacuolar membrane	EC:3.6.1	Acting on acid anhydrides
10	O82575_SOLLC	UniRef90_Q9ZRB6	Cluster: Ci21A protein	UniProtKB Unreviewed (TrEMBL); UniParc	35	Solanum tuberosum (Potato); Capsicum baccatum (Peruvian pepper); Capsicum chinense (Scotch bonnet); Capsicum annuum (Capsicum pepper); Solanum peruvianum (Peruvian tomato); Solanum cheesmaniae (Galapagos Island tomato); Solanum chilense (Tomato); Solanum lycopersicum (Tomato); Solanum habrochaites (Wild tomato); [Lycopersicon] peruvianum var. humifusum; Solanum lycopersicum var. cerasiforme; Sola…	109	0.9	ASR1 protein	12547	23077.6	5	11	51.8182	0.8967	112	11.9589	true	[BLASTED, MAPPED, ANNOTATED]	tr|O82575|O82575_SOLLC	Fruit-ripening protein OS=Solanum lycopersicum OX=4081 GN=543574 PE=2 SV=1	110	20	1.48813e-63	98.37	6	P:GO:0009414; P:GO:0010043; F:GO:0008270; F:GO:0042802; C:GO:0005634; C:GO:0032991	P:response to water deprivation; P:response to zinc ion; F:zinc ion binding; F:identical protein binding; C:nucleus; C:protein-containing complex
11	A0A3Q7E9M8_SOLLC	UniRef90_A0A3Q7E9M8	Cluster: ADP-ribosylation factor 2	UniProtKB Unreviewed (TrEMBL)	1	Solanum lycopersicum (Tomato)	209	0.9	ADP-ribosylation factor 2	24147	22888.1	11	19	60.2871	1.0825	145	27.3335	true	[BLASTED, MAPPED, ANNOTATED]	tr|A0A3Q7E9M8|A0A3Q7E9M8_SOLLC	Uncharacterized protein OS=Solanum lycopersicum OX=4081 PE=3 SV=1	209	20	1.25204e-130	97.44	3	F:GO:0003924; F:GO:0005525; C:GO:0009507	F:GTPase activity; F:GTP binding; C:chloroplast	EC:3.6.1	Acting on acid anhydrides
12	A0A3Q7GNF0_SOLLC	UniRef90_A0A3Q7GNF0	Cluster: Usp domain-containing protein	UniProtKB Unreviewed (TrEMBL); UniParc	6	Solanum lycopersicum (Tomato); Solanum chacoense (Chaco potato); Solanum tuberosum (Potato); Solanum verrucosum; Solanum pennellii; Solanum stenotomum	161	0.9	universal stress protein PHOS34	17472	21765.4	6	12	39.1304	1.8882	113	10.0949	true	[BLASTED]	tr|A0A3Q7GNF0|A0A3Q7GNF0_SOLLC	Usp domain-containing protein OS=Solanum lycopersicum OX=4081 GN=101256975 PE=4 SV=1	161	20	8.80581e-113	89.07
13	A0A3Q7FX57_SOLLC	UniRef90_I1HT87	Cluster: Heat shock cognate 70 kDa protein	UniProtKB Unreviewed (TrEMBL); UniParc	46	Brachypodium distachyon (Purple false brome); Solanum lycopersicum (Tomato); Rhododendron simsii (Sims's rhododendron); Oryza brachyantha (malo sina); Theobroma cacao (Cacao); Robinia pseudoacacia (Black locust); Triticum aestivum (Wheat); Solanum chilense (Tomato); Spinacia oleracea (Spinach); Tetracentron sinense; Olea europaea subsp. europaea; Vitis vinifera (Grape); Solanum tuberosum (Potato)…	654	0.9	heat shock cognate 70 kDa protein 2-like	85456	21344.3	22	62	39.3901	3.5498	434	25.3037	true	[BLASTED, MAPPED, ANNOTATED]	tr|A0A3Q7FX57|A0A3Q7FX57_SOLLC	Uncharacterized protein OS=Solanum lycopersicum OX=4081 PE=3 SV=1	787	20	0	98.49	9	P:GO:0034620; P:GO:0042026; P:GO:0051085; F:GO:0005524; F:GO:0031072; F:GO:0044183; F:GO:0051082; F:GO:0051787; C:GO:0005788	P:cellular response to unfolded protein; P:protein refolding; P:chaperone cofactor-dependent protein refolding; F:ATP binding; F:heat shock protein binding; F:protein folding chaperone; F:unfolded protein binding; F:misfolded protein binding; C:endoplasmic reticulum lumen
14	A0A3Q7FN07_SOLLC	UniRef90_A0A2G3A7D2	Cluster: V-type proton ATPase subunit C	UniProtKB Unreviewed (TrEMBL); UniParc	21	Capsicum annuum (Capsicum pepper); Capsicum baccatum (Peruvian pepper); Capsicum chinense (Scotch bonnet); Solanum lycopersicum (Tomato); Nicotiana tabacum (Common tobacco); Nicotiana sylvestris (Wood tobacco); Solanum chacoense (Chaco potato); Solanum chilense (Tomato); Nicotiana attenuata (Coyote tobacco); Solanum verrucosum; Solanum tuberosum; Nicotiana tomentosiformis; Solanum stenotomum	377	0.9	V-type proton ATPase subunit C	42785	20009.1	19	33	69.9468	6.9417	336	20.2126	true	[BLASTED, MAPPED, ANNOTATED]	tr|A0A3Q7FN07|A0A3Q7FN07_SOLLC	V-type proton ATPase subunit C OS=Solanum lycopersicum OX=4081 PE=3 SV=1	376	20	0	97.58	3	P:GO:1902600; F:GO:0046961; C:GO:0000221	P:proton transmembrane transport; F:proton-transporting ATPase activity, rotational mechanism; C:vacuolar proton-transporting V-type ATPase, V1 domain	EC:7.1.3.1	H(+)-exporting diphosphatase
15	A0A3Q7IYI9_SOLLC	UniRef90_A0A1S4CVP2	Cluster: heat shock cognate 70 kDa protein-like	UniProtKB Unreviewed (TrEMBL); UniParc	35	Nicotiana tabacum (Common tobacco); Panicum virgatum (Blackwell switchgrass); Solanum lycopersicum (Tomato); Solanum chilense (Tomato); Solanum tuberosum (Potato); Vitis vinifera (Grape); Capsicum annuum (Capsicum pepper); Nicotiana sylvestris (Wood tobacco); Nicotiana attenuata (Coyote tobacco); Capsicum baccatum (Peruvian pepper); Solanum chacoense (Chaco potato); Capsicum chinense (Scotch bonn…	651	0.9	heat shock cognate 70 kDa protein	71414	19974.5	20	56	45.107	3.8226	387	23.178	true	[BLASTED, MAPPED, ANNOTATED]	tr|A0A3Q7IYI9|A0A3Q7IYI9_SOLLC	Uncharacterized protein OS=Solanum lycopersicum OX=4081 GN=101255164 PE=3 SV=1	654	20	0	98.57	9	P:GO:0034620; P:GO:0042026; P:GO:0051085; F:GO:0005524; F:GO:0031072; F:GO:0044183; F:GO:0051082; F:GO:0051787; C:GO:0005788	P:cellular response to unfolded protein; P:protein refolding; P:chaperone cofactor-dependent protein refolding; F:ATP binding; F:heat shock protein binding; F:protein folding chaperone; F:unfolded protein binding; F:misfolded protein binding; C:endoplasmic reticulum lumen
16	Q38JD4_SOLLC	UniRef90_Q38JD4	Cluster: Temperature-induced lipocalin	UniProtKB Unreviewed (TrEMBL)	6	Solanum lycopersicum (Tomato); Solanum tuberosum (Potato); Solanum chilense (Tomato); Solanum chacoense (Chaco potato)	185	0.9	temperature-induced lipocalin	21451	19604.8	9	18	46.4865	1.5615	160	13.9139	true	[BLASTED, MAPPED, ANNOTATED]	tr|Q38JD4|Q38JD4_SOLLC	Temperature-induced lipocalin OS=Solanum lycopersicum OX=4081 GN=TIL PE=2 SV=1	185	20	3.68952e-134	94.18	4	P:GO:0000302; P:GO:0006629; F:GO:0052662; C:GO:0005737	P:response to reactive oxygen species; P:lipid metabolic process; F:zeaxanthin epoxidase activity; C:cytoplasm	EC:1.14.15.21	Zeaxanthin epoxidase
17	A0A3Q7IZ03_SOLLC	UniRef90_P22953	Cluster: Heat shock 70 kDa protein 1	UniProtKB Reviewed (Swiss-Prot); UniProtKB Unreviewed (TrEMBL); UniParc	99	Arabidopsis thaliana (Mouse-ear cress); Arabidopsis suecica (Swedish thale-cress); Arabidopsis thaliana x Arabidopsis arenosa; Triticum urartu (Red wild einkorn); Aegilops tauschii subsp. strangulata (Goatgrass); Vitis vinifera (Grape); Ziziphus jujuba (Chinese jujube); Chimonanthus praecox; Capsella rubella; Noccaea caerulescens (Alpine penny-cress); Eutrema salsugineum (Saltwater cress); Arabis…	651	0.9	heat shock cognate 70 kDa protein 2-like	71099	19352.9	18	54	39.4453	3.736	342	22.4244	true	[BLASTED, MAPPED, ANNOTATED]	tr|A0A3Q7IZ03|A0A3Q7IZ03_SOLLC	Uncharacterized protein OS=Solanum lycopersicum OX=4081 PE=3 SV=1	649	20	0	98.51	9	P:GO:0034620; P:GO:0042026; P:GO:0051085; F:GO:0005524; F:GO:0031072; F:GO:0044183; F:GO:0051082; F:GO:0051787; C:GO:0005788	P:cellular response to unfolded protein; P:protein refolding; P:chaperone cofactor-dependent protein refolding; F:ATP binding; F:heat shock protein binding; F:protein folding chaperone; F:unfolded protein binding; F:misfolded protein binding; C:endoplasmic reticulum lumen
18	A0A3Q7HZV3_SOLLC	UniRef90_I7GVS5	Cluster: Heat shock protein 70	UniProtKB Unreviewed (TrEMBL); UniParc	118	Nicotiana tabacum (Common tobacco); Nicotiana sylvestris (Wood tobacco); Nicotiana benthamiana; Eucalyptus grandis (Flooded gum); Aquilegia coerulea (Rocky mountain columbine); Triticum aestivum (Wheat); Spirodela intermedia (Intermediate duckweed); Olea europaea subsp. europaea; Aegilops tauschii (Tausch's goatgrass); Aegilops tauschii subsp. strangulata (Goatgrass); Triticum urartu (Red wild ei…	649	0.9	heat shock cognate 70 kDa protein 2-like	71180	19308.8	17	54	36.2096	6.9759	330	21.0002	true	[BLASTED, MAPPED, ANNOTATED]	tr|A0A3Q7HZV3|A0A3Q7HZV3_SOLLC	Uncharacterized protein OS=Solanum lycopersicum OX=4081 GN=101247151 PE=3 SV=1	649	20	0	98.87	9	P:GO:0034620; P:GO:0042026; P:GO:0051085; F:GO:0005524; F:GO:0031072; F:GO:0044183; F:GO:0051082; F:GO:0051787; C:GO:0005788	P:cellular response to unfolded protein; P:protein refolding; P:chaperone cofactor-dependent protein refolding; F:ATP binding; F:heat shock protein binding; F:protein folding chaperone; F:unfolded protein binding; F:misfolded protein binding; C:endoplasmic reticulum lumen
19	A0A3Q7EQU5_SOLLC	UniRef90_A2XLF2	Cluster: Actin-1	UniProtKB Reviewed (Swiss-Prot); UniProtKB Unreviewed (TrEMBL); UniParc	52	Oryza sativa subsp. indica (Rice); Oryza sativa subsp. japonica (Rice); Solanum tuberosum (Potato); Oryza punctata (Red rice); Oryza barthii; Oryza glaberrima (African rice); Oryza rufipogon (Brownbeard rice); Oryza sativa (Rice); Oryza meridionalis; Oryza nivara (Indian wild rice); Oryza glumipatula; Eucalyptus grandis (Flooded gum); Triticum aestivum (Wheat); Phyllostachys bambusoides (timber b…	377	0.9	actin-101	41643	18486.3	15	38	45.0928	16.4928	132	26.9327	true	[BLASTED, MAPPED, ANNOTATED]	tr|A0A3Q7EQU5|A0A3Q7EQU5_SOLLC	Uncharacterized protein OS=Solanum lycopersicum OX=4081 GN=101250165 PE=3 SV=1	377	20	0	99.84	3	F:GO:0005524; C:GO:0005737; C:GO:0005856	F:ATP binding; C:cytoplasm; C:cytoskeleton
20	B1N678_SOLLC	UniRef90_A0A6N2ARA6	Cluster: Knot1 domain-containing protein	UniProtKB Unreviewed (TrEMBL); UniParc	12	Solanum chilense (Tomato); Solanum lycopersicum (Tomato); Solanum lycopersicum var. cerasiforme; Solanum pimpinellifolium (Currant tomato); Solanum tuberosum (Potato); Solanum chacoense (Chaco potato); Solanum pennellii; Solanum stenotomum; Solanum verrucosum	76	0.9	Defensin-like protein	8439	16684.6	3	6	43.4211	0.4543	72	6.7372	true	[BLASTED, MAPPED, ANNOTATED]	tr|B1N678|B1N678_SOLLC	Defensin protein OS=Solanum lycopersicum OX=4081 GN=543741 PE=4 SV=1	76	20	1.72921e-47	92.17	1	P:GO:0006952	P:defense response
21	LOXB_SOLLC	UniRef90_P38416	Cluster: Linoleate 9S-lipoxygenase B	UniProtKB Reviewed (Swiss-Prot); UniProtKB Unreviewed (TrEMBL)	4	Solanum lycopersicum (Tomato); Solanum chilense (Tomato)	859	0.9	putative linoleate 9S-lipoxygenase 5	97061	16368.8	42	87	56.3446	0.9468	784	19.6637	true	[BLASTED, MAPPED, ANNOTATED]	sp|P38416|LOXB_SOLLC	Linoleate 9S-lipoxygenase B OS=Solanum lycopersicum OX=4081 GN=LOX1.2 PE=2 SV=1	859	20	0	90.27	6	P:GO:0006633; P:GO:0031408; P:GO:0034440; F:GO:0046872; F:GO:1990136; C:GO:0005737	P:fatty acid biosynthetic process; P:oxylipin biosynthetic process; P:lipid oxidation; F:metal ion binding; F:linoleate 9S-lipoxygenase activity; C:cytoplasm	EC:1.13.11.58	Linoleate 9S-lipoxygenase
22	A0A3Q7IAT1_SOLLC	UniRef90_A0A3Q7IAT1	Cluster: Plasma membrane-associated cation-binding protein 1	UniProtKB Unreviewed (TrEMBL); UniParc	5	Solanum lycopersicum (Tomato); Solanum chilense (Tomato); Solanum pennellii; Solanum stenotomum; Solanum verrucosum	201	0.9	plasma membrane-associated cation-binding protein 1	21918	15398.9	9	29	57.2139	1.1634	188	24.8245	true	[BLASTED, MAPPED, ANNOTATED]	tr|A0A3Q7IAT1|A0A3Q7IAT1_SOLLC	Uncharacterized protein OS=Solanum lycopersicum OX=4081 GN=101260974 PE=4 SV=1	201	20	7.00004e-135	87.22	1	C:GO:0046658	C:anchored component of plasma membrane
23	K4DFV3_SOLLC	UniRef90_Q08451	Cluster: Probable aquaporin PIP-type pTOM75	UniProtKB Reviewed (Swiss-Prot); UniProtKB Unreviewed (TrEMBL); UniParc	62	Solanum lycopersicum (Tomato); Solanum chilense (Tomato); Solanum chacoense (Chaco potato); Nicotiana sylvestris (Wood tobacco); Nicotiana tabacum (Common tobacco); Solanum tuberosum (Potato); Nicotiana tomentosiformis (Tobacco); Capsicum baccatum (Peruvian pepper); Capsicum chinense (Scotch bonnet); Capsicum annuum (Capsicum pepper); Nicotiana attenuata (Coyote tobacco); Nicotiana excelsior; Lyc…	286	0.9	probable aquaporin PIP-type pTOM75	30801	14794	6	24	17.3611	1.1203	188	20.5735	true	[BLASTED, MAPPED, ANNOTATED]	tr|K4DFV3|K4DFV3_SOLLC	Plasmamembrane intrinsic protein 13 OS=Solanum lycopersicum OX=4081 GN=101264708 PE=2 SV=1	288	20	0	98.93	8	P:GO:0006833; P:GO:0009414; P:GO:0055085; F:GO:0015250; C:GO:0005773; C:GO:0005886; C:GO:0009506; C:GO:0016021	P:water transport; P:response to water deprivation; P:transmembrane transport; F:water channel activity; C:vacuole; C:plasma membrane; C:plasmodesma; C:integral component of membrane	EC:7	Translocases
24	A0A3Q7FJI3_SOLLC	UniRef90_A0A3Q7FJI3	Cluster: Fe2OG dioxygenase domain-containing protein	UniProtKB Unreviewed (TrEMBL); UniParc	7	Solanum lycopersicum (Tomato); Solanum lycopersicum var. cerasiforme; Solanum chilense (Tomato); Solanum pennellii	321	0.9	probable 2-oxoglutarate-dependent dioxygenase AOP1	36506	14348.8	7	22	36.1371	0.6297	138	21.0025	true	[BLASTED, MAPPED, ANNOTATED]	tr|A0A3Q7FJI3|A0A3Q7FJI3_SOLLC	Fe2OG dioxygenase domain-containing protein OS=Solanum lycopersicum OX=4081 GN=104644281 PE=3 SV=1	321	20	0	89.76	3	F:GO:0031418; F:GO:0046872; F:GO:0051213	F:L-ascorbic acid binding; F:metal ion binding; F:dioxygenase activity	EC:1	Oxidoreductases
25	A0A3Q7FVM4_SOLLC	UniRef90_A0A1S4C5D8	Cluster: ras-related protein Rab7-like	UniProtKB Unreviewed (TrEMBL); UniParc	24	Nicotiana tabacum (Common tobacco); Nicotiana attenuata (Coyote tobacco); Nicotiana sylvestris (Wood tobacco); Papaver somniferum (Opium poppy); Solanum tuberosum (Potato); Solanum lycopersicum (Tomato); Solanum chilense (Tomato); Solanum chacoense (Chaco potato); Olea europaea subsp. europaea; Nicotiana benthamiana; Capsicum baccatum (Peruvian pepper); Capsicum chinense (Scotch bonnet); Capsicum…	205	0.9	ras-related protein Rab7	22954	14254.7	10	21	59.0244	5.4755	188	29.5284	true	[BLASTED, MAPPED, ANNOTATED]	tr|A0A3Q7FVM4|A0A3Q7FVM4_SOLLC	Uncharacterized protein OS=Solanum lycopersicum OX=4081 GN=101261599 PE=4 SV=1	205	20	5.90685e-151	98.76	3	F:GO:0003924; F:GO:0005525; C:GO:0005774	F:GTPase activity; F:GTP binding; C:vacuolar membrane	EC:3.6.1	Acting on acid anhydrides
26	Q9SYU8_SOLLC	UniRef90_P30221	Cluster: 17.8 kDa class I heat shock protein	UniProtKB Reviewed (Swiss-Prot); UniProtKB Unreviewed (TrEMBL); UniParc	58	Solanum lycopersicum (Tomato); Solanum peruvianum (Peruvian tomato); Solanum tuberosum (Potato); Solanum chilense (Tomato); Capsicum baccatum (Peruvian pepper); Capsicum chinense (Scotch bonnet); Capsicum annuum (Capsicum pepper); Nicotiana tabacum (Common tobacco); Nicotiana attenuata (Coyote tobacco); Nicotiana sylvestris (Wood tobacco); Escherichia coli; Solanum stenotomum; Solanum pennellii; …	154	0.9	17.6 kDa class I heat shock protein-like	17723	14132.3	9	17	55.1948	0.9688	124	15.3908	true	[BLASTED, MAPPED, ANNOTATED]	tr|Q9SYU8|Q9SYU8_SOLLC	17.7 kD class I small heat shock protein OS=Solanum lycopersicum OX=4081 GN=HSP17.7 PE=2 SV=1	154	20	4.66247e-106	97.79	8	P:GO:0006457; P:GO:0009408; P:GO:0009651; P:GO:0042542; P:GO:0051259; F:GO:0043621; F:GO:0051082; C:GO:0005737	P:protein folding; P:response to heat; P:response to salt stress; P:response to hydrogen peroxide; P:protein complex oligomerization; F:protein self-association; F:unfolded protein binding; C:cytoplasm
27	A0A3Q7FS03_SOLLC	UniRef90_A0A3Q7FS03	Cluster: Heat shock protein 70 family	UniProtKB Unreviewed (TrEMBL); UniParc	20	Solanum lycopersicum (Tomato); Olea europaea subsp. europaea; Rhodamnia argentea; Solanum chilense (Tomato); Capsicum annuum (Capsicum pepper); Capsicum baccatum (Peruvian pepper); Ziziphus jujuba (Chinese jujube); Capsicum chinense (Scotch bonnet); Punica granatum (Pomegranate); Herrania umbratica; Corchorus capsularis (Jute); Pistacia vera; Solanum pennellii; Solanum stenotomum; Ziziphus jujuba…	654	0.9	heat shock 70 kDa protein	71804	13869.6	13	55	25.2294	5.3273	165	21.458	true	[BLASTED, MAPPED, ANNOTATED]	tr|A0A3Q7FS03|A0A3Q7FS03_SOLLC	Uncharacterized protein OS=Solanum lycopersicum OX=4081 GN=101255185 PE=3 SV=1	654	20	0	97.39	10	P:GO:0034620; P:GO:0042026; P:GO:0051085; F:GO:0005524; F:GO:0031072; F:GO:0032440; F:GO:0044183; F:GO:0051082; F:GO:0051787; C:GO:0005788	P:cellular response to unfolded protein; P:protein refolding; P:chaperone cofactor-dependent protein refolding; F:ATP binding; F:heat shock protein binding; F:2-alkenal reductase [NAD(P)+] activity; F:protein folding chaperone; F:unfolded protein binding; F:misfolded protein binding; C:endoplasmic reticulum lumen	EC:1.3.1.74	2-alkenal reductase (NAD(P)(+))
28	A0A3Q7H3K1_SOLLC	UniRef90_A0A3Q7H3K1	Cluster: MI domain-containing protein	UniProtKB Unreviewed (TrEMBL)	1	Solanum lycopersicum (Tomato)	1407	0.9	eukaryotic translation initiation factor isoform 4g-1	154625	13806.7	17	122	15.2097	8.8692	210	31.3872	true	[BLASTED, MAPPED, ANNOTATED]	tr|A0A3Q7H3K1|A0A3Q7H3K1_SOLLC	MI domain-containing protein OS=Solanum lycopersicum OX=4081 PE=4 SV=1	1407	20	0	95.09	5	P:GO:0006413; P:GO:0006417; F:GO:0003729; F:GO:0003743; C:GO:0016281	P:translational initiation; P:regulation of translation; F:mRNA binding; F:translation initiation factor activity; C:eukaryotic translation initiation factor 4F complex
29	A0A6F8PJG0_SOLLC	UniRef90_A0A3Q7FJI3	Cluster: Fe2OG dioxygenase domain-containing protein	UniProtKB Unreviewed (TrEMBL); UniParc	7	Solanum lycopersicum (Tomato); Solanum lycopersicum var. cerasiforme; Solanum chilense (Tomato); Solanum pennellii	321	0.9	probable 2-oxoglutarate-dependent dioxygenase AOP1	36497	13541.7	9	26	50.7788	3.1121	135	30.3225	true	[BLASTED, MAPPED, ANNOTATED]	tr|A0A6F8PJG0|A0A6F8PJG0_SOLLC	Alpha-tomatine 23-hydroxylase OS=Solanum lycopersicum OX=4081 GN=23DOX PE=2 SV=1	321	20	0	89.92	3	F:GO:0031418; F:GO:0046872; F:GO:0051213	F:L-ascorbic acid binding; F:metal ion binding; F:dioxygenase activity	EC:1	Oxidoreductases
30	A0A3Q7FKE1_SOLLC	UniRef90_Q9FSY7	Cluster: Endoplasmic reticulum chaperone BiP	UniProtKB Reviewed (Swiss-Prot); UniProtKB Unreviewed (TrEMBL); UniParc	264	Corylus avellana (European hazel); Nicotiana tabacum (Common tobacco); Salix brachista; Salix viminalis (Common osier); Gossypium barbadense (Sea-island cotton); Gossypium australe; Gossypium armourianum; Gossypium schwendimanii (Cotton); Eutrema salsugineum (Saltwater cress); Eutrema halophilum (Salt cress); Cuscuta campestris; Raphanus sativus (Radish); Brassica oleracea var. oleracea; Brassica…	668	0.9	luminal-binding protein 5	73444	13313.6	14	73	23.6527	18.89	182	32.2588	true	[BLASTED, MAPPED, ANNOTATED]	tr|A0A3Q7FKE1|A0A3Q7FKE1_SOLLC	Uncharacterized protein OS=Solanum lycopersicum OX=4081 PE=3 SV=1	668	20	0	97.88	13	P:GO:0030433; P:GO:0030968; P:GO:0042026; P:GO:0051085; F:GO:0005524; F:GO:0031072; F:GO:0044183; F:GO:0051082; F:GO:0051787; C:GO:0005634; C:GO:0005788; C:GO:0016021; C:GO:0034663	P:ubiquitin-dependent ERAD pathway; P:endoplasmic reticulum unfolded protein response; P:protein refolding; P:chaperone cofactor-dependent protein refolding; F:ATP binding; F:heat shock protein binding; F:protein folding chaperone; F:unfolded protein binding; F:misfolded protein binding; C:nucleus; C:endoplasmic reticulum lumen; C:integral component of membrane; C:endoplasmic reticulum chaperone …
31	BIP_SOLLC	UniRef90_P49118	Cluster: Luminal-binding protein	UniProtKB Reviewed (Swiss-Prot); UniProtKB Unreviewed (TrEMBL); UniParc	28	Solanum lycopersicum (Tomato); Nicotiana attenuata (Coyote tobacco); Medicago truncatula (Barrel medic); Trifolium medium; Solanum tuberosum (Potato); Solanum chilense (Tomato); Cicer arietinum (Chickpea); Musa balbisiana (Banana); Musa acuminata subsp. malaccensis (Wild banana); Miscanthus lutarioriparius; Glycine max (Soybean); Impatiens glandulifera; Pisum sativum; Solanum verrucosum; Solanum …	666	0.9	luminal-binding protein	73189	13027	14	72	23.5736	10.7659	175	34.0474	true	[BLASTED, MAPPED, ANNOTATED]	sp|P49118|BIP_SOLLC	Luminal-binding protein OS=Solanum lycopersicum OX=4081 PE=2 SV=1	666	20	0	97.99	13	P:GO:0030433; P:GO:0030968; P:GO:0042026; P:GO:0051085; F:GO:0005524; F:GO:0031072; F:GO:0044183; F:GO:0051082; F:GO:0051787; C:GO:0005634; C:GO:0005788; C:GO:0016020; C:GO:0034663	P:ubiquitin-dependent ERAD pathway; P:endoplasmic reticulum unfolded protein response; P:protein refolding; P:chaperone cofactor-dependent protein refolding; F:ATP binding; F:heat shock protein binding; F:protein folding chaperone; F:unfolded protein binding; F:misfolded protein binding; C:nucleus; C:endoplasmic reticulum lumen; C:membrane; C:endoplasmic reticulum chaperone complex
32	A0A3Q7EZ16_SOLLC	UniRef90_Q41418	Cluster: 14-3-3-like protein	UniProtKB Reviewed (Swiss-Prot); UniProtKB Unreviewed (TrEMBL); UniParc	174	Solanum tuberosum (Potato); Tripterygium wilfordii (Thunder God vine); Juglans regia (English walnut); Carya illinoinensis (Pecan); Castanea mollissima (Chinese chestnut); Quercus lobata (Valley oak); Carpinus fangiana; Fagus sylvatica (Beechnut); Manihot esculenta (Cassava); Hevea brasiliensis (Para rubber tree); Rhodamnia argentea; Jatropha curcas (Barbados nut); Cucumis sativus (Cucumber); Cuc…	259	0.9	14-3-3 protein 4	29320	11609.5	12	32	54.6154	0.6684	180	27.9644	true	[BLASTED, MAPPED, ANNOTATED]	tr|A0A3Q7EZ16|A0A3Q7EZ16_SOLLC	14_3_3 domain-containing protein OS=Solanum lycopersicum OX=4081 GN=543791 PE=3 SV=1	260	20	0	97.82	12	P:GO:0007165; P:GO:0046686; P:GO:0090378; F:GO:0005524; F:GO:0019904; F:GO:0043130; F:GO:0046982; C:GO:0005618; C:GO:0005739; C:GO:0005794; C:GO:0005829; C:GO:0005886	P:signal transduction; P:response to cadmium ion; P:seed trichome elongation; F:ATP binding; F:protein domain specific binding; F:ubiquitin binding; F:protein heterodimerization activity; C:cell wall; C:mitochondrion; C:Golgi apparatus; C:cytosol; C:plasma membrane
33	A0A3Q7F0I2_SOLLC	UniRef90_A0A3Q7F0I2	Cluster: V-type proton ATPase subunit D	UniProtKB Unreviewed (TrEMBL); UniParc	36	Solanum lycopersicum (Tomato); Solanum chilense (Tomato); Solanum tuberosum (Potato); Solanum chacoense (Chaco potato); Solanum cheesmaniae (Galapagos Island tomato); Solanum lycopersicoides; Solanum chmielewskii; Solanum peruvianum (Peruvian tomato); Solanum pimpinellifolium (Currant tomato); Solanum arcanum; Solanum quitoense; Solanum hirtum; Nicotiana attenuata (Coyote tobacco); Capsicum bacca…	261	0.9	V-type proton ATPase subunit D	29041	11295.2	15	29	49.4253	4.719	200	23.07	true	[BLASTED, MAPPED, ANNOTATED]	tr|A0A3Q7F0I2|A0A3Q7F0I2_SOLLC	Uncharacterized protein OS=Solanum lycopersicum OX=4081 PE=3 SV=1	261	20	0	96.95	4	P:GO:1902600; F:GO:0046961; C:GO:0005774; C:GO:0033176	P:proton transmembrane transport; F:proton-transporting ATPase activity, rotational mechanism; C:vacuolar membrane; C:proton-transporting V-type ATPase complex	EC:7.1.3.1	H(+)-exporting diphosphatase
34	A0A3Q7FE06_SOLLC	UniRef90_A0A3Q7FE06	Cluster: V-type proton ATPase subunit a	UniProtKB Unreviewed (TrEMBL); UniParc	16	Solanum lycopersicum (Tomato); Solanum chacoense (Chaco potato); Capsicum baccatum (Peruvian pepper); Solanum chilense (Tomato); Capsicum chinense (Scotch bonnet); Capsicum annuum (Capsicum pepper); Nicotiana tabacum (Common tobacco); Nicotiana attenuata (Coyote tobacco); Nicotiana sylvestris (Wood tobacco); Solanum verrucosum; Solanum tuberosum; Solanum stenotomum; Solanum pennellii; Nicotiana t…	820	0.9	V-type proton ATPase subunit a3	92689	11269.7	28	62	37.9268	17.4105	494	20.3558	true	[BLASTED, MAPPED, ANNOTATED]	tr|A0A3Q7FE06|A0A3Q7FE06_SOLLC	V-type proton ATPase subunit a OS=Solanum lycopersicum OX=4081 GN=101265176 PE=3 SV=1	820	20	0	95.27	15	P:GO:0006270; P:GO:0007035; P:GO:0032508; P:GO:1902600; F:GO:0003677; F:GO:0003678; F:GO:0005524; F:GO:0015078; F:GO:0016787; F:GO:0051117; C:GO:0000220; C:GO:0005634; C:GO:0016021; C:GO:0016471; C:GO:0042555	P:DNA replication initiation; P:vacuolar acidification; P:DNA duplex unwinding; P:proton transmembrane transport; F:DNA binding; F:DNA helicase activity; F:ATP binding; F:proton transmembrane transporter activity; F:hydrolase activity; F:ATPase binding; C:vacuolar proton-transporting V-type ATPase, V0 domain; C:nucleus; C:integral component of membrane; C:vacuolar proton-transporting V-type ATPas…	EC:3.6.4.12; EC:7	DNA helicase; Translocases
35	A0A3Q7J492_SOLLC	UniRef90_A0A3Q7J492	Cluster: FAD_binding_3 domain-containing protein	UniProtKB Unreviewed (TrEMBL); UniParc	22	Solanum lycopersicum (Tomato); Solanum chilense (Tomato); Solanum chacoense (Chaco potato); Solanum tuberosum (Potato); Solanum verrucosum; Solanum pennellii; Solanum stenotomum	407	0.9	FAD-dependent urate hydroxylase-like isoform X1	44546	11224.4	18	29	58.7224	6.8441	260	28.2605	true	[BLASTED, MAPPED, ANNOTATED]	tr|A0A3Q7J492|A0A3Q7J492_SOLLC	FAD_binding_3 domain-containing protein OS=Solanum lycopersicum OX=4081 GN=101247497 PE=4 SV=1	407	20	0	91.16	3	F:GO:0004497; F:GO:0071949; C:GO:0016021	F:monooxygenase activity; F:FAD binding; C:integral component of membrane	EC:1	Oxidoreductases
[truncated: 222 more rows]

## Sheet: E) F4
N	Entry	Accession	Cluster ID in UniRef	Cluster Name	Types	Size	Organisms		Description Blast OmicsBox	Mw (Da)	PLGS Score	Peptides	Theoretical Peptides	Coverage (%)	Precursor RMS Mass Error (ppm)	Products	Products RMS Mass Error (ppm)		Tags	SeqName	Description UniProt	Length	#Hits	e-Value	sim mean	#GO	GO IDs	GO Names	Enzyme Codes	Enzyme Names
[truncated: 304 more rows]

## Sheet: F) F5 (B1)
N	Entry	Accession	Cluster ID in UniRef	Cluster Name	Size	Organisms	Length	Identity	Description Blast OmicsBox	Mw(Da)	PLGS Score	Peptides	Theoretical Peptides	Coverage (%)	Precursor RMS Mass Error (ppm)	Products	Products RMS Mass Error (ppm)		Tags	SeqName	Description UniProt	Length	#Hits	e-Value	sim mean	#GO	GO IDs	GO Names	Enzyme Codes	Enzyme Names
[truncated: 258 more rows]

[truncated: 7 more sheets: G) F6, H) F7, I) F8 (B2), K) F9 (B3), L) F10, M) F11, N) F12]
