# Supplementary material for: Protein Biocargo and Anti-Inflammatory Effect of Tomato Fruit-Derived Nanovesicles Separated by Density Gradient Ultracentrifugation and Loaded with Curcumin
Source: Pharmaceutics. 2023 Jan 19;15(2):333. doi: 10.3390/pharmaceutics15020333 (PMC9961453; doi:10.3390/pharmaceutics15020333)
Supplement: Supplementary file 1 [file pharmaceutics-15-00333-s001.zip › Supplementary Table S2. GO 0050794.xlsx]

## Sheet: NVs_GO 0050794
Supplementary Table S2A: List of proteins with gene ontology (GO) term GO:0050794 (Regulation of cellular processes) identified in tomato fruit derived nanovesicles isolated by differential ultracentrifugation (crude PDNVs)
Acc number UniProt	Cluster ID	Cluster Name	Types	Size	Organisms	Length	Identity
P93209	UniRef90_P93209	Cluster: 14-3-3 protein 3	UniProtKB Reviewed (Swiss-Prot); UniProtKB Unreviewed (TrEMBL); UniParc	22	Solanum lycopersicum (Tomato); Nicotiana tabacum (Common tobacco); Solanum chilense (Tomato); Nicotiana attenuata (Coyote tobacco); Nicotiana sylvestris (Wood tobacco); Solanum tuberosum (Potato); Solanum chacoense (Chaco potato); Capsicum baccatum (Peruvian pepper); Capsicum chinense (Scotch bonnet); Capsicum annuum (Capsicum pepper); Kribbella monticola; Solanum stenotomum	260	0.9
14333_SOLLC	UniRef90_P93209	Cluster: 14-3-3 protein 3	UniProtKB Reviewed (Swiss-Prot); UniProtKB Unreviewed (TrEMBL); UniParc	22	Solanum lycopersicum (Tomato); Nicotiana tabacum (Common tobacco); Solanum chilense (Tomato); Nicotiana attenuata (Coyote tobacco); Nicotiana sylvestris (Wood tobacco); Solanum tuberosum (Potato); Solanum chacoense (Chaco potato); Capsicum baccatum (Peruvian pepper); Capsicum chinense (Scotch bonnet); Capsicum annuum (Capsicum pepper); Kribbella monticola; Solanum stenotomum	260	0.9
A0A3Q7EH12	UniRef90_A0A3Q7EH12	Cluster: GTP-binding protein SAR1A	UniProtKB Unreviewed (TrEMBL)	3	Solanum lycopersicum (Tomato); Solanum chilense (Tomato); Mangifera indica (Mango)	193	0.9
A0A3Q7EH12_SOLLC	UniRef90_A0A3Q7EH12	Cluster: GTP-binding protein SAR1A	UniProtKB Unreviewed (TrEMBL)	3	Solanum lycopersicum (Tomato); Solanum chilense (Tomato); Mangifera indica (Mango)	193	0.9
P52884	UniRef90_P52884	Cluster: GTP-binding protein SAR2	UniProtKB Reviewed (Swiss-Prot); UniProtKB Unreviewed (TrEMBL); UniParc	19	Solanum lycopersicum (Tomato); Solanum chilense (Tomato); Capsicum baccatum (Peruvian pepper); Capsicum chinense (Scotch bonnet); Capsicum annuum (Capsicum pepper); Solanum tuberosum (Potato); Solanum chacoense (Chaco potato); Nicotiana attenuata (Coyote tobacco); Nicotiana tabacum (Common tobacco); Nicotiana sylvestris (Wood tobacco); Solanum stenotomum; Nicotiana tomentosiformis	193	0.9
SAR2_SOLLC	UniRef90_P52884	Cluster: GTP-binding protein SAR2	UniProtKB Reviewed (Swiss-Prot); UniProtKB Unreviewed (TrEMBL); UniParc	19	Solanum lycopersicum (Tomato); Solanum chilense (Tomato); Capsicum baccatum (Peruvian pepper); Capsicum chinense (Scotch bonnet); Capsicum annuum (Capsicum pepper); Solanum tuberosum (Potato); Solanum chacoense (Chaco potato); Nicotiana attenuata (Coyote tobacco); Nicotiana tabacum (Common tobacco); Nicotiana sylvestris (Wood tobacco); Solanum stenotomum; Nicotiana tomentosiformis	193	0.9
A0A3Q7FR28	UniRef90_A0A2G2ZW06	Cluster: Programmed cell death protein 4	UniProtKB Unreviewed (TrEMBL); UniParc	19	Capsicum annuum (Capsicum pepper); Solanum chilense (Tomato); Capsicum chinense (Scotch bonnet); Capsicum baccatum (Peruvian pepper); Solanum lycopersicum (Tomato); Nicotiana tabacum (Common tobacco); Nicotiana attenuata (Coyote tobacco); Solanum chacoense (Chaco potato); Solanum pennellii; Solanum verrucosum; Solanum tuberosum; Solanum stenotomum; Nicotiana tomentosiformis	714	0.9
A0A3Q7FR28_SOLLC	UniRef90_A0A2G2ZW06	Cluster: Programmed cell death protein 4	UniProtKB Unreviewed (TrEMBL); UniParc	19	Capsicum annuum (Capsicum pepper); Solanum chilense (Tomato); Capsicum chinense (Scotch bonnet); Capsicum baccatum (Peruvian pepper); Solanum lycopersicum (Tomato); Nicotiana tabacum (Common tobacco); Nicotiana attenuata (Coyote tobacco); Solanum chacoense (Chaco potato); Solanum pennellii; Solanum verrucosum; Solanum tuberosum; Solanum stenotomum; Nicotiana tomentosiformis	714	0.9
A0A3Q7G727	UniRef90_M1CBH0	Cluster: Alcohol dehydrogenase 1	UniProtKB Unreviewed (TrEMBL); UniParc	10	Solanum tuberosum (Potato); Capsicum chinense (Scotch bonnet); Capsicum annuum (Capsicum pepper); Solanum chilense (Tomato); Capsicum baccatum (Peruvian pepper); Solanum lycopersicum (Tomato); Solanum pennellii; Solanum verrucosum	379	0.9
A0A3Q7G727_SOLLC	UniRef90_M1CBH0	Cluster: Alcohol dehydrogenase 1	UniProtKB Unreviewed (TrEMBL); UniParc	10	Solanum tuberosum (Potato); Capsicum chinense (Scotch bonnet); Capsicum annuum (Capsicum pepper); Solanum chilense (Tomato); Capsicum baccatum (Peruvian pepper); Solanum lycopersicum (Tomato); Solanum pennellii; Solanum verrucosum	379	0.9
A0A3Q7EQ86	UniRef90_A0A1S4AVH1	Cluster: GTP-binding protein SAR1A	UniProtKB Unreviewed (TrEMBL); UniParc	12	Nicotiana tabacum (Common tobacco); Nicotiana attenuata (Coyote tobacco); Nicotiana sylvestris (Wood tobacco); Nicotiana plumbaginifolia (Leadwort-leaved tobacco); Solanum tuberosum (Potato); Solanum chacoense (Chaco potato); Solanum lycopersicum (Tomato); Actinidia chinensis var. chinensis (Chinese soft-hair kiwi); Phtheirospermum japonicum; Ipomoea triloba; Nicotiana tomentosiformis	193	0.9
A0A3Q7EQ86_SOLLC	UniRef90_A0A1S4AVH1	Cluster: GTP-binding protein SAR1A	UniProtKB Unreviewed (TrEMBL); UniParc	12	Nicotiana tabacum (Common tobacco); Nicotiana attenuata (Coyote tobacco); Nicotiana sylvestris (Wood tobacco); Nicotiana plumbaginifolia (Leadwort-leaved tobacco); Solanum tuberosum (Potato); Solanum chacoense (Chaco potato); Solanum lycopersicum (Tomato); Actinidia chinensis var. chinensis (Chinese soft-hair kiwi); Phtheirospermum japonicum; Ipomoea triloba; Nicotiana tomentosiformis	193	0.9
A0A3Q7JBH3	UniRef90_A0A3Q7JBH3	Cluster: 14_3_3 domain-containing protein	UniProtKB Unreviewed (TrEMBL)	1	Solanum lycopersicum (Tomato)	401	0.9
A0A3Q7JBH3_SOLLC	UniRef90_A0A3Q7JBH3	Cluster: 14_3_3 domain-containing protein	UniProtKB Unreviewed (TrEMBL)	1	Solanum lycopersicum (Tomato)	401	0.9
A0A3Q7FZI2	UniRef90_P93210	Cluster: 14-3-3 protein 5	UniProtKB Reviewed (Swiss-Prot); UniProtKB Unreviewed (TrEMBL); UniParc	18	Solanum lycopersicum (Tomato); Nicotiana tabacum (Common tobacco); Solanum tuberosum (Potato); Capsicum baccatum (Peruvian pepper); Solanum chacoense (Chaco potato); Solanum chilense (Tomato); Nicotiana sylvestris (Wood tobacco); Nicotiana attenuata (Coyote tobacco); Solanum pennellii	255	0.9
A0A3Q7FZI2_SOLLC	UniRef90_P93210	Cluster: 14-3-3 protein 5	UniProtKB Reviewed (Swiss-Prot); UniProtKB Unreviewed (TrEMBL); UniParc	18	Solanum lycopersicum (Tomato); Nicotiana tabacum (Common tobacco); Solanum tuberosum (Potato); Capsicum baccatum (Peruvian pepper); Solanum chacoense (Chaco potato); Solanum chilense (Tomato); Nicotiana sylvestris (Wood tobacco); Nicotiana attenuata (Coyote tobacco); Solanum pennellii	255	0.9
P93214	UniRef90_P93214	Cluster: 14-3-3 protein 9	UniProtKB Reviewed (Swiss-Prot); UniProtKB Unreviewed (TrEMBL); UniParc	15	Solanum lycopersicum (Tomato); Capsicum annuum (Capsicum pepper); Nicotiana tabacum (Common tobacco); Nicotiana attenuata (Coyote tobacco); Nicotiana sylvestris (Wood tobacco); Solanum tuberosum (Potato); Solanum chilense (Tomato); Solanum chacoense (Chaco potato); Capsicum chinense (Scotch bonnet); Capsicum baccatum (Peruvian pepper); Solanum pennellii; Solanum verrucosum	261	0.9
14339_SOLLC	UniRef90_P93214	Cluster: 14-3-3 protein 9	UniProtKB Reviewed (Swiss-Prot); UniProtKB Unreviewed (TrEMBL); UniParc	15	Solanum lycopersicum (Tomato); Capsicum annuum (Capsicum pepper); Nicotiana tabacum (Common tobacco); Nicotiana attenuata (Coyote tobacco); Nicotiana sylvestris (Wood tobacco); Solanum tuberosum (Potato); Solanum chilense (Tomato); Solanum chacoense (Chaco potato); Capsicum chinense (Scotch bonnet); Capsicum baccatum (Peruvian pepper); Solanum pennellii; Solanum verrucosum	261	0.9
P49118	UniRef90_P49118	Cluster: Luminal-binding protein	UniProtKB Reviewed (Swiss-Prot); UniProtKB Unreviewed (TrEMBL); UniParc	28	Solanum lycopersicum (Tomato); Nicotiana attenuata (Coyote tobacco); Medicago truncatula (Barrel medic); Trifolium medium; Solanum tuberosum (Potato); Solanum chilense (Tomato); Cicer arietinum (Chickpea); Musa balbisiana (Banana); Musa acuminata subsp. malaccensis (Wild banana); Miscanthus lutarioriparius; Glycine max (Soybean); Impatiens glandulifera; Pisum sativum; Solanum verrucosum; Solanum …	666	0.9
BIP_SOLLC	UniRef90_P49118	Cluster: Luminal-binding protein	UniProtKB Reviewed (Swiss-Prot); UniProtKB Unreviewed (TrEMBL); UniParc	28	Solanum lycopersicum (Tomato); Nicotiana attenuata (Coyote tobacco); Medicago truncatula (Barrel medic); Trifolium medium; Solanum tuberosum (Potato); Solanum chilense (Tomato); Cicer arietinum (Chickpea); Musa balbisiana (Banana); Musa acuminata subsp. malaccensis (Wild banana); Miscanthus lutarioriparius; Glycine max (Soybean); Impatiens glandulifera; Pisum sativum; Solanum verrucosum; Solanum …	666	0.9
A0A3Q7HZY2	UniRef90_A0A3Q7HZY2	Cluster: Senescence-associated protein	UniProtKB Unreviewed (TrEMBL); UniParc	16	Solanum lycopersicum (Tomato); Withania somnifera; Capsicum annuum (Capsicum pepper); Capsicum baccatum (Peruvian pepper); Solanum tuberosum (Potato); Solanum chacoense (Chaco potato); Nicotiana tabacum (Common tobacco); Nicotiana sylvestris (Wood tobacco); Nicotiana attenuata (Coyote tobacco); Solanum chilense (Tomato); Solanum stenotomum; Solanum verrucosum; Solanum pennellii	266	0.9
A0A3Q7HZY2_SOLLC	UniRef90_A0A3Q7HZY2	Cluster: Senescence-associated protein	UniProtKB Unreviewed (TrEMBL); UniParc	16	Solanum lycopersicum (Tomato); Withania somnifera; Capsicum annuum (Capsicum pepper); Capsicum baccatum (Peruvian pepper); Solanum tuberosum (Potato); Solanum chacoense (Chaco potato); Nicotiana tabacum (Common tobacco); Nicotiana sylvestris (Wood tobacco); Nicotiana attenuata (Coyote tobacco); Solanum chilense (Tomato); Solanum stenotomum; Solanum verrucosum; Solanum pennellii	266	0.9
A0A3Q7JAV3	UniRef90_M1CIA9	Cluster: Malic enzyme	UniProtKB Unreviewed (TrEMBL); UniParc	12	Solanum tuberosum (Potato); Nicotiana tabacum (Common tobacco); Nicotiana sylvestris (Wood tobacco); Nicotiana attenuata (Coyote tobacco); Solanum chilense (Tomato); Solanum lycopersicum (Tomato); Solanum stenotomum; Solanum verrucosum; Solanum pennellii	640	0.9
A0A3Q7JAV3_SOLLC	UniRef90_M1CIA9	Cluster: Malic enzyme	UniProtKB Unreviewed (TrEMBL); UniParc	12	Solanum tuberosum (Potato); Nicotiana tabacum (Common tobacco); Nicotiana sylvestris (Wood tobacco); Nicotiana attenuata (Coyote tobacco); Solanum chilense (Tomato); Solanum lycopersicum (Tomato); Solanum stenotomum; Solanum verrucosum; Solanum pennellii	640	0.9
A0A3Q7F872	UniRef90_A0A1S3YWY0	Cluster: mediator of RNA polymerase II transcription subunit 37a-like	UniProtKB Unreviewed (TrEMBL); UniParc	17	Nicotiana tabacum (Common tobacco); Solanum lycopersicum (Tomato); Solanum chilense (Tomato); Solanum tuberosum (Potato); Solanum chacoense (Chaco potato); Nicotiana sylvestris (Wood tobacco); Nicotiana attenuata (Coyote tobacco); Capsicum annuum (Capsicum pepper); Capsicum chinense (Scotch bonnet); Capsicum baccatum (Peruvian pepper); Solanum pennellii	668	0.9
A0A3Q7F872_SOLLC	UniRef90_A0A1S3YWY0	Cluster: mediator of RNA polymerase II transcription subunit 37a-like	UniProtKB Unreviewed (TrEMBL); UniParc	17	Nicotiana tabacum (Common tobacco); Solanum lycopersicum (Tomato); Solanum chilense (Tomato); Solanum tuberosum (Potato); Solanum chacoense (Chaco potato); Nicotiana sylvestris (Wood tobacco); Nicotiana attenuata (Coyote tobacco); Capsicum annuum (Capsicum pepper); Capsicum chinense (Scotch bonnet); Capsicum baccatum (Peruvian pepper); Solanum pennellii	668	0.9
A0A3Q7FKE1	UniRef90_Q9FSY7	Cluster: Endoplasmic reticulum chaperone BiP	UniProtKB Reviewed (Swiss-Prot); UniProtKB Unreviewed (TrEMBL); UniParc	264	Corylus avellana (European hazel); Nicotiana tabacum (Common tobacco); Salix brachista; Salix viminalis (Common osier); Gossypium barbadense (Sea-island cotton); Gossypium australe; Gossypium armourianum; Gossypium schwendimanii (Cotton); Eutrema salsugineum (Saltwater cress); Eutrema halophilum (Salt cress); Cuscuta campestris; Raphanus sativus (Radish); Brassica oleracea var. oleracea; Brassica…	668	0.9
A0A3Q7FKE1_SOLLC	UniRef90_Q9FSY7	Cluster: Endoplasmic reticulum chaperone BiP	UniProtKB Reviewed (Swiss-Prot); UniProtKB Unreviewed (TrEMBL); UniParc	264	Corylus avellana (European hazel); Nicotiana tabacum (Common tobacco); Salix brachista; Salix viminalis (Common osier); Gossypium barbadense (Sea-island cotton); Gossypium australe; Gossypium armourianum; Gossypium schwendimanii (Cotton); Eutrema salsugineum (Saltwater cress); Eutrema halophilum (Salt cress); Cuscuta campestris; Raphanus sativus (Radish); Brassica oleracea var. oleracea; Brassica…	668	0.9
A0A3Q7EZ16	UniRef90_Q41418	Cluster: 14-3-3-like protein	UniProtKB Reviewed (Swiss-Prot); UniProtKB Unreviewed (TrEMBL); UniParc	174	Solanum tuberosum (Potato); Tripterygium wilfordii (Thunder God vine); Juglans regia (English walnut); Carya illinoinensis (Pecan); Castanea mollissima (Chinese chestnut); Quercus lobata (Valley oak); Carpinus fangiana; Fagus sylvatica (Beechnut); Manihot esculenta (Cassava); Hevea brasiliensis (Para rubber tree); Rhodamnia argentea; Jatropha curcas (Barbados nut); Cucumis sativus (Cucumber); Cuc…	259	0.9
A0A3Q7EZ16_SOLLC	UniRef90_Q41418	Cluster: 14-3-3-like protein	UniProtKB Reviewed (Swiss-Prot); UniProtKB Unreviewed (TrEMBL); UniParc	174	Solanum tuberosum (Potato); Tripterygium wilfordii (Thunder God vine); Juglans regia (English walnut); Carya illinoinensis (Pecan); Castanea mollissima (Chinese chestnut); Quercus lobata (Valley oak); Carpinus fangiana; Fagus sylvatica (Beechnut); Manihot esculenta (Cassava); Hevea brasiliensis (Para rubber tree); Rhodamnia argentea; Jatropha curcas (Barbados nut); Cucumis sativus (Cucumber); Cuc…	259	0.9
A0A3Q7GTE7	UniRef90_A0A1U8H482	Cluster: alcohol dehydrogenase 1	UniProtKB Unreviewed (TrEMBL)	12	Capsicum annuum (Capsicum pepper); Solanum lycopersicum (Tomato); Solanum pimpinellifolium (Currant tomato); Solanum lycopersicum var. cerasiforme; Solanum pennellii (Tomato); Solanum peruvianum (Peruvian tomato); Solanum cheesmaniae (Galapagos Island tomato); Capsicum chinense (Scotch bonnet); Nicotiana attenuata (Coyote tobacco); Nicotiana tabacum (Common tobacco)	380	0.9
A0A3Q7GTE7_SOLLC	UniRef90_A0A1U8H482	Cluster: alcohol dehydrogenase 1	UniProtKB Unreviewed (TrEMBL)	12	Capsicum annuum (Capsicum pepper); Solanum lycopersicum (Tomato); Solanum pimpinellifolium (Currant tomato); Solanum lycopersicum var. cerasiforme; Solanum pennellii (Tomato); Solanum peruvianum (Peruvian tomato); Solanum cheesmaniae (Galapagos Island tomato); Capsicum chinense (Scotch bonnet); Nicotiana attenuata (Coyote tobacco); Nicotiana tabacum (Common tobacco)	380	0.9
A0A3Q7GX91	UniRef90_A0A3Q7GX91	Cluster: mitogen-activated protein kinase	UniProtKB Unreviewed (TrEMBL); UniParc	2	Solanum lycopersicum (Tomato)	1275	0.9
A0A3Q7GX91_SOLLC	UniRef90_A0A3Q7GX91	Cluster: mitogen-activated protein kinase	UniProtKB Unreviewed (TrEMBL); UniParc	2	Solanum lycopersicum (Tomato)	1275	0.9
P93207	UniRef90_P93207	Cluster: 14-3-3 protein 10	UniProtKB Reviewed (Swiss-Prot); UniProtKB Unreviewed (TrEMBL); UniParc	15	Solanum lycopersicum (Tomato); Solanum chilense (Tomato); Capsicum chinense (Scotch bonnet); Capsicum baccatum (Peruvian pepper); Capsicum annuum (Capsicum pepper); Petunia hybrida (Petunia); Nicotiana tabacum (Common tobacco); Nicotiana sylvestris (Wood tobacco); Nicotiana attenuata (Coyote tobacco); Solanum nigrum (Black nightshade); Solanum verrucosum; Ipomoea triloba; Ipomoea nil	252	0.9
14310_SOLLC	UniRef90_P93207	Cluster: 14-3-3 protein 10	UniProtKB Reviewed (Swiss-Prot); UniProtKB Unreviewed (TrEMBL); UniParc	15	Solanum lycopersicum (Tomato); Solanum chilense (Tomato); Capsicum chinense (Scotch bonnet); Capsicum baccatum (Peruvian pepper); Capsicum annuum (Capsicum pepper); Petunia hybrida (Petunia); Nicotiana tabacum (Common tobacco); Nicotiana sylvestris (Wood tobacco); Nicotiana attenuata (Coyote tobacco); Solanum nigrum (Black nightshade); Solanum verrucosum; Ipomoea triloba; Ipomoea nil	252	0.9
A0A3Q7IR67	UniRef90_P93206	Cluster: 14-3-3 protein 1	UniProtKB Reviewed (Swiss-Prot); UniProtKB Unreviewed (TrEMBL); UniParc	18	Solanum lycopersicum (Tomato); Nicotiana tabacum (Common tobacco); Capsicum baccatum (Peruvian pepper); Capsicum chinense (Scotch bonnet); Capsicum annuum (Capsicum pepper); Nicotiana sylvestris (Wood tobacco); Solanum tuberosum (Potato); Solanum chacoense (Chaco potato); Solanum chilense (Tomato); Nicotiana attenuata (Coyote tobacco); Nicotiana tomentosiformis; Solanum stenotomum	249	0.9
A0A3Q7IR67_SOLLC	UniRef90_P93206	Cluster: 14-3-3 protein 1	UniProtKB Reviewed (Swiss-Prot); UniProtKB Unreviewed (TrEMBL); UniParc	18	Solanum lycopersicum (Tomato); Nicotiana tabacum (Common tobacco); Capsicum baccatum (Peruvian pepper); Capsicum chinense (Scotch bonnet); Capsicum annuum (Capsicum pepper); Nicotiana sylvestris (Wood tobacco); Solanum tuberosum (Potato); Solanum chacoense (Chaco potato); Solanum chilense (Tomato); Nicotiana attenuata (Coyote tobacco); Nicotiana tomentosiformis; Solanum stenotomum	249	0.9
Q9SXS0	UniRef90_P49026	Cluster: Guanine nucleotide-binding protein subunit beta-like protein	UniProtKB Reviewed (Swiss-Prot); UniProtKB Unreviewed (TrEMBL); UniParc	50	Nicotiana tabacum (Common tobacco); Nicotiana plumbaginifolia (Leadwort-leaved tobacco); Capsicum baccatum (Peruvian pepper); Capsicum chinense (Scotch bonnet); Capsicum annuum (Capsicum pepper); Solanum lycopersicum (Tomato); Solanum chilense (Tomato); Solanum tuberosum (Potato); Nicotiana benthamiana; Nicotiana attenuata (Coyote tobacco); Nicotiana sylvestris (Wood tobacco); Solanum chacoense (…	326	0.9
Q9SXS0_SOLLC	UniRef90_P49026	Cluster: Guanine nucleotide-binding protein subunit beta-like protein	UniProtKB Reviewed (Swiss-Prot); UniProtKB Unreviewed (TrEMBL); UniParc	50	Nicotiana tabacum (Common tobacco); Nicotiana plumbaginifolia (Leadwort-leaved tobacco); Capsicum baccatum (Peruvian pepper); Capsicum chinense (Scotch bonnet); Capsicum annuum (Capsicum pepper); Solanum lycopersicum (Tomato); Solanum chilense (Tomato); Solanum tuberosum (Potato); Nicotiana benthamiana; Nicotiana attenuata (Coyote tobacco); Nicotiana sylvestris (Wood tobacco); Solanum chacoense (…	326	0.9
Q7Y240	UniRef90_Q7Y240	Cluster: Glutaredoxin-dependent peroxiredoxin	UniProtKB Unreviewed (TrEMBL); UniParc	19	Solanum lycopersicum (Tomato); Solanum chacoense (Chaco potato); Phanerochaete pseudomagnoliae; Nicotiana tabacum (Common tobacco); Capsicum annuum (Capsicum pepper); Solanum chilense (Tomato); Solanum tuberosum (Potato); Nicotiana attenuata (Coyote tobacco); Capsicum baccatum (Peruvian pepper); Nicotiana benthamiana; Capsicum chinense (Scotch bonnet); Nicotiana sylvestris (Wood tobacco); Solanum…	162	0.9
Q7Y240_SOLLC	UniRef90_Q7Y240	Cluster: Glutaredoxin-dependent peroxiredoxin	UniProtKB Unreviewed (TrEMBL); UniParc	19	Solanum lycopersicum (Tomato); Solanum chacoense (Chaco potato); Phanerochaete pseudomagnoliae; Nicotiana tabacum (Common tobacco); Capsicum annuum (Capsicum pepper); Solanum chilense (Tomato); Solanum tuberosum (Potato); Nicotiana attenuata (Coyote tobacco); Capsicum baccatum (Peruvian pepper); Nicotiana benthamiana; Capsicum chinense (Scotch bonnet); Nicotiana sylvestris (Wood tobacco); Solanum…	162	0.9

## Sheet: F5_GO 0050794
Supplementary Table S2B: List of proteins with gene ontology (GO) term GO:0050794 (Regulation of cellular processes) identified in fraction 5 of density gradient ultracentrifugation separated tomato fruit derived nanovesicles
Acc number UniProt	Cluster ID	Cluster Name	Types	Size	Organisms	Length	Identity
14333_SOLLC	UniRef90_P93209	Cluster: 14-3-3 protein 3	UniProtKB Reviewed (Swiss-Prot); UniProtKB Unreviewed (TrEMBL); UniParc	22	Solanum lycopersicum (Tomato); Nicotiana tabacum (Common tobacco); Solanum chilense (Tomato); Nicotiana attenuata (Coyote tobacco); Nicotiana sylvestris (Wood tobacco); Solanum tuberosum (Potato); Solanum chacoense (Chaco potato); Capsicum baccatum (Peruvian pepper); Capsicum chinense (Scotch bonnet); Capsicum annuum (Capsicum pepper); Kribbella monticola; Solanum stenotomum	260	0.9
A0A3Q7IXT2_SOLLC	UniRef90_A0A3Q7IXT2	Cluster: Protein kinase domain-containing protein	UniProtKB Unreviewed (TrEMBL); UniParc	14	Solanum lycopersicum (Tomato); Nicotiana sylvestris (Wood tobacco); Nicotiana tabacum (Common tobacco); Solanum chilense (Tomato); Nicotiana attenuata (Coyote tobacco); Solanum tuberosum (Potato); Capsicum chinense (Scotch bonnet); Solanum chacoense (Chaco potato); Capsicum annuum (Capsicum pepper); Capsicum baccatum (Peruvian pepper); Solanum verrucosum; Solanum pennellii; Nicotiana tomentosifor…	487	0.9
SAR2_SOLLC	UniRef90_P52884	Cluster: GTP-binding protein SAR2	UniProtKB Reviewed (Swiss-Prot); UniProtKB Unreviewed (TrEMBL); UniParc	19	Solanum lycopersicum (Tomato); Solanum chilense (Tomato); Capsicum baccatum (Peruvian pepper); Capsicum chinense (Scotch bonnet); Capsicum annuum (Capsicum pepper); Solanum tuberosum (Potato); Solanum chacoense (Chaco potato); Nicotiana attenuata (Coyote tobacco); Nicotiana tabacum (Common tobacco); Nicotiana sylvestris (Wood tobacco); Solanum stenotomum; Nicotiana tomentosiformis	193	0.9
A0A3Q7FZ41_SOLLC	UniRef90_A0A3Q7FZ41	Cluster: Ras-related protein RABE1c-like	UniProtKB Unreviewed (TrEMBL)	8	Solanum lycopersicum (Tomato); Solanum chilense (Tomato); Capsicum baccatum (Peruvian pepper); Capsicum chinense (Scotch bonnet); Capsicum annuum (Capsicum pepper); Solanum tuberosum (Potato)	216	0.9
A0A3Q7F872_SOLLC	UniRef90_A0A1S3YWY0	Cluster: mediator of RNA polymerase II transcription subunit 37a-like	UniProtKB Unreviewed (TrEMBL); UniParc	17	Nicotiana tabacum (Common tobacco); Solanum lycopersicum (Tomato); Solanum chilense (Tomato); Solanum tuberosum (Potato); Solanum chacoense (Chaco potato); Nicotiana sylvestris (Wood tobacco); Nicotiana attenuata (Coyote tobacco); Capsicum annuum (Capsicum pepper); Capsicum chinense (Scotch bonnet); Capsicum baccatum (Peruvian pepper); Solanum pennellii	668	0.9
A0A3Q7FKE1_SOLLC	UniRef90_Q9FSY7	Cluster: Endoplasmic reticulum chaperone BiP	UniProtKB Reviewed (Swiss-Prot); UniProtKB Unreviewed (TrEMBL); UniParc	264	Corylus avellana (European hazel); Nicotiana tabacum (Common tobacco); Salix brachista; Salix viminalis (Common osier); Gossypium barbadense (Sea-island cotton); Gossypium australe; Gossypium armourianum; Gossypium schwendimanii (Cotton); Eutrema salsugineum (Saltwater cress); Eutrema halophilum (Salt cress); Cuscuta campestris; Raphanus sativus (Radish); Brassica oleracea var. oleracea; Brassica…	668	0.9
A0A3Q7GJM0_SOLLC	UniRef90_O49952	Cluster: Phosphoinositide phospholipase C	UniProtKB Unreviewed (TrEMBL); UniParc	9	Solanum tuberosum (Potato); Solanum lycopersicum (Tomato); Solanum chilense (Tomato); Solanum verrucosum; Solanum stenotomum; Solanum pennellii	585	0.9
A0A3Q7GTE7_SOLLC	UniRef90_A0A1U8H482	Cluster: alcohol dehydrogenase 1	UniProtKB Unreviewed (TrEMBL)	12	Capsicum annuum (Capsicum pepper); Solanum lycopersicum (Tomato); Solanum pimpinellifolium (Currant tomato); Solanum lycopersicum var. cerasiforme; Solanum pennellii (Tomato); Solanum peruvianum (Peruvian tomato); Solanum cheesmaniae (Galapagos Island tomato); Capsicum chinense (Scotch bonnet); Nicotiana attenuata (Coyote tobacco); Nicotiana tabacum (Common tobacco)	380	0.9
A0A3Q7GX91_SOLLC	UniRef90_A0A3Q7GX91	Cluster: mitogen-activated protein kinase	UniProtKB Unreviewed (TrEMBL); UniParc	2	Solanum lycopersicum (Tomato)	1275	0.9
14310_SOLLC	UniRef90_P93207	Cluster: 14-3-3 protein 10	UniProtKB Reviewed (Swiss-Prot); UniProtKB Unreviewed (TrEMBL); UniParc	15	Solanum lycopersicum (Tomato); Solanum chilense (Tomato); Capsicum chinense (Scotch bonnet); Capsicum baccatum (Peruvian pepper); Capsicum annuum (Capsicum pepper); Petunia hybrida (Petunia); Nicotiana tabacum (Common tobacco); Nicotiana sylvestris (Wood tobacco); Nicotiana attenuata (Coyote tobacco); Solanum nigrum (Black nightshade); Solanum verrucosum; Ipomoea triloba; Ipomoea nil	252	0.9
A0A3Q7J5Z9_SOLLC	UniRef90_O22402	Cluster: Guanosine nucleotide diphosphate dissociation inhibitor	UniProtKB Unreviewed (TrEMBL); UniParc	26	Nicotiana tabacum (Common tobacco); Nicotiana sylvestris (Wood tobacco); Nicotiana attenuata (Coyote tobacco); Olea europaea subsp. europaea; Handroanthus impetiginosus; Helianthus annuus (Common sunflower); Phtheirospermum japonicum; Striga asiatica (Asiatic witchweed); Solanum chacoense (Chaco potato); Sesamum indicum (Oriental sesame); Solanum lycopersicum (Tomato); Solanum tuberosum (Potato);…	444	0.9
A0A3Q7ILR7_SOLLC	UniRef90_A0A2G2YNK6	Cluster: Expp1 protein	UniProtKB Unreviewed (TrEMBL); UniParc	15	Capsicum annuum (Capsicum pepper); Solanum lycopersicum (Tomato); Solanum tuberosum (Potato); Solanum chilense (Tomato); Solanum chacoense (Chaco potato); Nicotiana sylvestris (Wood tobacco); Nicotiana attenuata (Coyote tobacco); Nicotiana tabacum (Common tobacco); Solanum pennellii; Solanum stenotomum; Nicotiana tomentosiformis	240	0.9
A0A3Q7HYT0_SOLLC	UniRef90_A0A3Q7HYT0	Cluster: Protein kinase domain-containing protein	UniProtKB Unreviewed (TrEMBL); UniParc	15	Solanum lycopersicum (Tomato); Capsicum baccatum (Peruvian pepper); Nicotiana attenuata (Coyote tobacco); Solanum chilense (Tomato); Solanum tuberosum (Potato); Capsicum annuum (Capsicum pepper); Capsicum chinense (Scotch bonnet); Nicotiana tabacum (Common tobacco); Nicotiana sylvestris (Wood tobacco); Solanum pennellii; Solanum verrucosum	491	0.9
A0A3Q7H112_SOLLC	UniRef90_A0A3Q7H112	Cluster: Peptidase_M24 domain-containing protein	UniProtKB Unreviewed (TrEMBL)	2	Solanum lycopersicum (Tomato); Genlisea aurea	402	0.9
A0A3Q7G5G1_SOLLC	UniRef90_A0A3Q7G5G1	Cluster: 14_3_3 domain-containing protein	UniProtKB Unreviewed (TrEMBL); UniParc	8	Solanum lycopersicum (Tomato); Solanum chilense (Tomato); Vanilla planifolia (Vanilla); Trichinella patagoniensis; Apostasia shenzhenica; Gossypium aridum (American cotton); Phalaenopsis equestris	258	0.9
A0A3Q7J9P2_SOLLC	UniRef90_P49026	Cluster: Guanine nucleotide-binding protein subunit beta-like protein	UniProtKB Reviewed (Swiss-Prot); UniProtKB Unreviewed (TrEMBL); UniParc	50	Nicotiana tabacum (Common tobacco); Nicotiana plumbaginifolia (Leadwort-leaved tobacco); Capsicum baccatum (Peruvian pepper); Capsicum chinense (Scotch bonnet); Capsicum annuum (Capsicum pepper); Solanum lycopersicum (Tomato); Solanum chilense (Tomato); Solanum tuberosum (Potato); Nicotiana benthamiana; Nicotiana attenuata (Coyote tobacco); Nicotiana sylvestris (Wood tobacco); Solanum chacoense (…	326	0.9
A0A3Q7EH12_SOLLC	UniRef90_A0A3Q7EH12	Cluster: GTP-binding protein SAR1A	UniProtKB Unreviewed (TrEMBL)	3	Solanum lycopersicum (Tomato); Solanum chilense (Tomato); Mangifera indica (Mango)	193	0.9
A0A3Q7HLY0_SOLLC	UniRef90_M1B2L7	Cluster: Guanosine nucleotide diphosphate dissociation inhibitor	UniProtKB Unreviewed (TrEMBL); UniParc	17	Solanum tuberosum (Potato); Capsicum chinense (Scotch bonnet); Capsicum annuum (Capsicum pepper); Solanum chilense (Tomato); Capsicum baccatum (Peruvian pepper); Solanum lycopersicum (Tomato); Solanum chacoense (Chaco potato); Solanum verrucosum; Solanum stenotomum; Solanum pennellii	444	0.9
Q8RW36_SOLLC	UniRef90_Q8RW36	Cluster: Calcium-dependent protein kinase	UniProtKB Unreviewed (TrEMBL); UniParc	17	Solanum lycopersicum (Tomato); Solanum tuberosum (Potato); Capsicum chinense (Scotch bonnet); Capsicum annuum (Capsicum pepper); Capsicum baccatum (Peruvian pepper); Solanum chilense (Tomato); Nicotiana tabacum (Common tobacco); Nicotiana sylvestris (Wood tobacco); Nicotiana attenuata (Coyote tobacco); Solanum chacoense (Chaco potato); Solanum stenotomum; Solanum verrucosum; Solanum pennellii	553	0.9
A0A3Q7EQ86_SOLLC	UniRef90_A0A1S4AVH1	Cluster: GTP-binding protein SAR1A	UniProtKB Unreviewed (TrEMBL); UniParc	12	Nicotiana tabacum (Common tobacco); Nicotiana attenuata (Coyote tobacco); Nicotiana sylvestris (Wood tobacco); Nicotiana plumbaginifolia (Leadwort-leaved tobacco); Solanum tuberosum (Potato); Solanum chacoense (Chaco potato); Solanum lycopersicum (Tomato); Actinidia chinensis var. chinensis (Chinese soft-hair kiwi); Phtheirospermum japonicum; Ipomoea triloba; Nicotiana tomentosiformis	193	0.9
14332_SOLLC	UniRef90_P93208	Cluster: 14-3-3 protein 2	UniProtKB Reviewed (Swiss-Prot); UniProtKB Unreviewed (TrEMBL)	7	Solanum lycopersicum (Tomato); Nyssa sinensis; Coffea canephora (Robusta coffee); Coffea arabica (Arabian coffee); Petunia hybrida (Petunia); Davidia involucrata (Dove tree); Olea europaea subsp. europaea	254	0.9
A0A3Q7FZI2_SOLLC	UniRef90_P93210	Cluster: 14-3-3 protein 5	UniProtKB Reviewed (Swiss-Prot); UniProtKB Unreviewed (TrEMBL); UniParc	18	Solanum lycopersicum (Tomato); Nicotiana tabacum (Common tobacco); Solanum tuberosum (Potato); Capsicum baccatum (Peruvian pepper); Solanum chacoense (Chaco potato); Solanum chilense (Tomato); Nicotiana sylvestris (Wood tobacco); Nicotiana attenuata (Coyote tobacco); Solanum pennellii	255	0.9
14339_SOLLC	UniRef90_P93214	Cluster: 14-3-3 protein 9	UniProtKB Reviewed (Swiss-Prot); UniProtKB Unreviewed (TrEMBL); UniParc	15	Solanum lycopersicum (Tomato); Capsicum annuum (Capsicum pepper); Nicotiana tabacum (Common tobacco); Nicotiana attenuata (Coyote tobacco); Nicotiana sylvestris (Wood tobacco); Solanum tuberosum (Potato); Solanum chilense (Tomato); Solanum chacoense (Chaco potato); Capsicum chinense (Scotch bonnet); Capsicum baccatum (Peruvian pepper); Solanum pennellii; Solanum verrucosum	261	0.9
A0A3Q7HZY2_SOLLC	UniRef90_A0A3Q7HZY2	Cluster: Senescence-associated protein	UniProtKB Unreviewed (TrEMBL); UniParc	16	Solanum lycopersicum (Tomato); Withania somnifera; Capsicum annuum (Capsicum pepper); Capsicum baccatum (Peruvian pepper); Solanum tuberosum (Potato); Solanum chacoense (Chaco potato); Nicotiana tabacum (Common tobacco); Nicotiana sylvestris (Wood tobacco); Nicotiana attenuata (Coyote tobacco); Solanum chilense (Tomato); Solanum stenotomum; Solanum verrucosum; Solanum pennellii	266	0.9
A0A3Q7EZ16_SOLLC	UniRef90_Q41418	Cluster: 14-3-3-like protein	UniProtKB Reviewed (Swiss-Prot); UniProtKB Unreviewed (TrEMBL); UniParc	174	Solanum tuberosum (Potato); Tripterygium wilfordii (Thunder God vine); Juglans regia (English walnut); Carya illinoinensis (Pecan); Castanea mollissima (Chinese chestnut); Quercus lobata (Valley oak); Carpinus fangiana; Fagus sylvatica (Beechnut); Manihot esculenta (Cassava); Hevea brasiliensis (Para rubber tree); Rhodamnia argentea; Jatropha curcas (Barbados nut); Cucumis sativus (Cucumber); Cuc…	259	0.9
A0A3Q7GTI1_SOLLC	UniRef90_A0A3Q7GTI1	Cluster: Luminal-binding protein 5	UniProtKB Unreviewed (TrEMBL); UniParc	2	Solanum lycopersicum (Tomato); Solanum pennellii	552	0.9
MAOC_SOLLC	UniRef90_P37222	Cluster: NADP-dependent malic enzyme, chloroplastic (Fragment)	UniProtKB Reviewed (Swiss-Prot); UniProtKB Unreviewed (TrEMBL)	2	Solanum lycopersicum (Tomato); Solanum chacoense (Chaco potato)	573	0.9
A0A3Q7IR67_SOLLC	UniRef90_P93206	Cluster: 14-3-3 protein 1	UniProtKB Reviewed (Swiss-Prot); UniProtKB Unreviewed (TrEMBL); UniParc	18	Solanum lycopersicum (Tomato); Nicotiana tabacum (Common tobacco); Capsicum baccatum (Peruvian pepper); Capsicum chinense (Scotch bonnet); Capsicum annuum (Capsicum pepper); Nicotiana sylvestris (Wood tobacco); Solanum tuberosum (Potato); Solanum chacoense (Chaco potato); Solanum chilense (Tomato); Nicotiana attenuata (Coyote tobacco); Nicotiana tomentosiformis; Solanum stenotomum	249	0.9
A0A3Q7G8G7_SOLLC	UniRef90_A0A3Q7G8G7	Cluster: 14_3_3 domain-containing protein	UniProtKB Unreviewed (TrEMBL); UniParc	7	Solanum lycopersicum (Tomato); Solanum chilense (Tomato); Nicotiana tabacum (Common tobacco); Nicotiana sylvestris (Wood tobacco); Nicotiana tomentosiformis	243	0.9
14338_SOLLC	UniRef90_P93213	Cluster: 14-3-3 protein 8	UniProtKB Reviewed (Swiss-Prot); UniProtKB Unreviewed (TrEMBL); UniParc	18	Solanum lycopersicum (Tomato); Solanum chacoense (Chaco potato); Capsicum chinense (Scotch bonnet); Solanum chilense (Tomato); Capsicum baccatum (Peruvian pepper); Solanum berthaultii; Capsicum annuum (Capsicum pepper); Solanum tuberosum (Potato); Solanum pennellii; Solanum verrucosum; Solanum stenotomum	261	0.9

## Sheet: F8_GO 0050794
Supplementary Table S2C: List of proteins with gene ontology (GO) term GO:0050794 (Regulation of cellular processes) identified in fraction 8 of density gradient ultracentrifugation separated tomato fruit derived nanovesicles
Acc number UniProt	Cluster ID	Cluster Name	Types	Size	Organisms	Length	Identity
A0A1U8H482	UniRef90_A0A1U8H482	Cluster: alcohol dehydrogenase 1	UniProtKB Unreviewed (TrEMBL)	12	Capsicum annuum (Capsicum pepper); Solanum lycopersicum (Tomato); Solanum pimpinellifolium (Currant tomato); Solanum lycopersicum var. cerasiforme; Solanum pennellii (Tomato); Solanum peruvianum (Peruvian tomato); Solanum cheesmaniae (Galapagos Island tomato); Capsicum chinense (Scotch bonnet); Nicotiana attenuata (Coyote tobacco); Nicotiana tabacum (Common tobacco)	380	0.9
A0A3Q7GTI1	UniRef90_A0A3Q7GTI1	Cluster: Luminal-binding protein 5	UniProtKB Unreviewed (TrEMBL); UniParc	2	Solanum lycopersicum (Tomato); Solanum pennellii	552	0.9
A0A1S4AVH1	UniRef90_A0A1S4AVH1	Cluster: GTP-binding protein SAR1A	UniProtKB Unreviewed (TrEMBL); UniParc	12	Nicotiana tabacum (Common tobacco); Nicotiana attenuata (Coyote tobacco); Nicotiana sylvestris (Wood tobacco); Nicotiana plumbaginifolia (Leadwort-leaved tobacco); Solanum tuberosum (Potato); Solanum chacoense (Chaco potato); Solanum lycopersicum (Tomato); Actinidia chinensis var. chinensis (Chinese soft-hair kiwi); Phtheirospermum japonicum; Ipomoea triloba; Nicotiana tomentosiformis	193	0.9
Q9FSY7	UniRef90_Q9FSY7	Cluster: Endoplasmic reticulum chaperone BiP	UniProtKB Reviewed (Swiss-Prot); UniProtKB Unreviewed (TrEMBL); UniParc	264	Corylus avellana (European hazel); Nicotiana tabacum (Common tobacco); Salix brachista; Salix viminalis (Common osier); Gossypium barbadense (Sea-island cotton); Gossypium australe; Gossypium armourianum; Gossypium schwendimanii (Cotton); Eutrema salsugineum (Saltwater cress); Eutrema halophilum (Salt cress); Cuscuta campestris; Raphanus sativus (Radish); Brassica oleracea var. oleracea; Brassica…	668	0.9
P93209	UniRef90_P93209	Cluster: 14-3-3 protein 3	UniProtKB Reviewed (Swiss-Prot); UniProtKB Unreviewed (TrEMBL); UniParc	22	Solanum lycopersicum (Tomato); Nicotiana tabacum (Common tobacco); Solanum chilense (Tomato); Nicotiana attenuata (Coyote tobacco); Nicotiana sylvestris (Wood tobacco); Solanum tuberosum (Potato); Solanum chacoense (Chaco potato); Capsicum baccatum (Peruvian pepper); Capsicum chinense (Scotch bonnet); Capsicum annuum (Capsicum pepper); Kribbella monticola; Solanum stenotomum	260	0.9
Q03685	UniRef90_Q03685	Cluster: Luminal-binding protein 5	UniProtKB Reviewed (Swiss-Prot); UniProtKB Unreviewed (TrEMBL); UniParc	40	Nicotiana tabacum (Common tobacco); Nicotiana attenuata (Coyote tobacco); Nicotiana sylvestris (Wood tobacco); Eucalyptus grandis (Flooded gum); Nymphaea colorata; Solanum lycopersicum (Tomato); Solanum chacoense (Chaco potato); Solanum tuberosum (Potato); Kingdonia uniflora; Populus deltoides (Eastern poplar); Lupinus albus (White lupine); Aquilegia coerulea (Rocky mountain columbine); Oryza mey…	668	0.9
Q7Y240	UniRef90_Q7Y240	Cluster: Glutaredoxin-dependent peroxiredoxin	UniProtKB Unreviewed (TrEMBL); UniParc	19	Solanum lycopersicum (Tomato); Solanum chacoense (Chaco potato); Phanerochaete pseudomagnoliae; Nicotiana tabacum (Common tobacco); Capsicum annuum (Capsicum pepper); Solanum chilense (Tomato); Solanum tuberosum (Potato); Nicotiana attenuata (Coyote tobacco); Capsicum baccatum (Peruvian pepper); Nicotiana benthamiana; Capsicum chinense (Scotch bonnet); Nicotiana sylvestris (Wood tobacco); Solanum…	162	0.9
P93207	UniRef90_P93207	Cluster: 14-3-3 protein 10	UniProtKB Reviewed (Swiss-Prot); UniProtKB Unreviewed (TrEMBL); UniParc	15	Solanum lycopersicum (Tomato); Solanum chilense (Tomato); Capsicum chinense (Scotch bonnet); Capsicum baccatum (Peruvian pepper); Capsicum annuum (Capsicum pepper); Petunia hybrida (Petunia); Nicotiana tabacum (Common tobacco); Nicotiana sylvestris (Wood tobacco); Nicotiana attenuata (Coyote tobacco); Solanum nigrum (Black nightshade); Solanum verrucosum; Ipomoea triloba; Ipomoea nil	252	0.9
P93214	UniRef90_P93214	Cluster: 14-3-3 protein 9	UniProtKB Reviewed (Swiss-Prot); UniProtKB Unreviewed (TrEMBL); UniParc	15	Solanum lycopersicum (Tomato); Capsicum annuum (Capsicum pepper); Nicotiana tabacum (Common tobacco); Nicotiana attenuata (Coyote tobacco); Nicotiana sylvestris (Wood tobacco); Solanum tuberosum (Potato); Solanum chilense (Tomato); Solanum chacoense (Chaco potato); Capsicum chinense (Scotch bonnet); Capsicum baccatum (Peruvian pepper); Solanum pennellii; Solanum verrucosum	261	0.9
P49118	UniRef90_P49118	Cluster: Luminal-binding protein	UniProtKB Reviewed (Swiss-Prot); UniProtKB Unreviewed (TrEMBL); UniParc	28	Solanum lycopersicum (Tomato); Nicotiana attenuata (Coyote tobacco); Medicago truncatula (Barrel medic); Trifolium medium; Solanum tuberosum (Potato); Solanum chilense (Tomato); Cicer arietinum (Chickpea); Musa balbisiana (Banana); Musa acuminata subsp. malaccensis (Wild banana); Miscanthus lutarioriparius; Glycine max (Soybean); Impatiens glandulifera; Pisum sativum; Solanum verrucosum; Solanum …	666	0.9
P93206	UniRef90_P93206	Cluster: 14-3-3 protein 1	UniProtKB Reviewed (Swiss-Prot); UniProtKB Unreviewed (TrEMBL); UniParc	18	Solanum lycopersicum (Tomato); Nicotiana tabacum (Common tobacco); Capsicum baccatum (Peruvian pepper); Capsicum chinense (Scotch bonnet); Capsicum annuum (Capsicum pepper); Nicotiana sylvestris (Wood tobacco); Solanum tuberosum (Potato); Solanum chacoense (Chaco potato); Solanum chilense (Tomato); Nicotiana attenuata (Coyote tobacco); Nicotiana tomentosiformis; Solanum stenotomum	249	0.9
P25858	UniRef90_P25858	Cluster: Glyceraldehyde-3-phosphate dehydrogenase GAPC1, cytosolic	UniProtKB Reviewed (Swiss-Prot); UniProtKB Unreviewed (TrEMBL); UniParc	254	Arabidopsis thaliana (Mouse-ear cress); Sinapis alba (White mustard); Arabidopsis suecica (Swedish thale-cress); Brassica oleracea (Wild cabbage); Brassica campestris (Field mustard); Brassica napus (Rape); Eruca vesicaria subsp. sativa (Garden rocket); Braya pilosa; Brassica oleracea var. oleracea; Quercus ilex (Holly oak); Castanea mollissima (Chinese chestnut); Carthamus tinctorius (Safflower)…	338	0.9
Q41418	UniRef90_Q41418	Cluster: 14-3-3-like protein	UniProtKB Reviewed (Swiss-Prot); UniProtKB Unreviewed (TrEMBL); UniParc	174	Solanum tuberosum (Potato); Tripterygium wilfordii (Thunder God vine); Juglans regia (English walnut); Carya illinoinensis (Pecan); Castanea mollissima (Chinese chestnut); Quercus lobata (Valley oak); Carpinus fangiana; Fagus sylvatica (Beechnut); Manihot esculenta (Cassava); Hevea brasiliensis (Para rubber tree); Rhodamnia argentea; Jatropha curcas (Barbados nut); Cucumis sativus (Cucumber); Cuc…	259	0.9
A0A3Q7EAX2	UniRef90_A0A3Q7EAX2	Cluster: 14_3_3 domain-containing protein	UniProtKB Unreviewed (TrEMBL); UniParc	14	Solanum lycopersicum (Tomato); Capsicum annuum (Capsicum pepper); Solanum chacoense (Chaco potato); Nicotiana attenuata (Coyote tobacco); Solanum chilense (Tomato); Solanum pennellii	249	0.9
P93212	UniRef90_P93212	Cluster: 14-3-3 protein 7	UniProtKB Reviewed (Swiss-Prot); UniProtKB Unreviewed (TrEMBL); UniParc	20	Solanum lycopersicum (Tomato); Solanum tuberosum (Potato); Solanum chacoense (Chaco potato); Olea europaea subsp. europaea; Nicotiana attenuata (Coyote tobacco); Capsicum annuum (Capsicum pepper); Capsicum baccatum (Peruvian pepper); Capsicum chinense (Scotch bonnet); Punica granatum (Pomegranate); Actinidia rufa; Ipomoea triloba; Salvia hispanica; Ipomoea nil; Salvia splendens; Solanum verrucosum	252	0.9
A0A3Q7ETU0	UniRef90_A0A3Q7ETU0	Cluster: AAA domain-containing protein	UniProtKB Unreviewed (TrEMBL)	3	Solanum lycopersicum (Tomato); Solanum chilense (Tomato); Capsicum chinense (Scotch bonnet)	435	0.9
A0A3Q7EH12	UniRef90_A0A3Q7EH12	Cluster: GTP-binding protein SAR1A	UniProtKB Unreviewed (TrEMBL)	3	Solanum lycopersicum (Tomato); Solanum chilense (Tomato); Mangifera indica (Mango)	193	0.9
A0A3Q7F894	UniRef90_A0A3Q7F894	Cluster: AAA domain-containing protein	UniProtKB Unreviewed (TrEMBL); UniParc	9	Solanum lycopersicum (Tomato); Solanum chacoense (Chaco potato); Solanum tuberosum (Potato); Solanum chilense (Tomato); Pyrus ussuriensis x Pyrus communis; Olea europaea subsp. europaea; Malus domestica; Pyrus x bretschneideri	458	0.9
A0A3Q7HZY2	UniRef90_A0A3Q7HZY2	Cluster: Senescence-associated protein	UniProtKB Unreviewed (TrEMBL); UniParc	16	Solanum lycopersicum (Tomato); Withania somnifera; Capsicum annuum (Capsicum pepper); Capsicum baccatum (Peruvian pepper); Solanum tuberosum (Potato); Solanum chacoense (Chaco potato); Nicotiana tabacum (Common tobacco); Nicotiana sylvestris (Wood tobacco); Nicotiana attenuata (Coyote tobacco); Solanum chilense (Tomato); Solanum stenotomum; Solanum verrucosum; Solanum pennellii	266	0.9
A0A3Q7GX91	UniRef90_A0A3Q7GX91	Cluster: mitogen-activated protein kinase	UniProtKB Unreviewed (TrEMBL); UniParc	2	Solanum lycopersicum (Tomato)	1275	0.9
A0A3Q7JBH3	UniRef90_A0A3Q7JBH3	Cluster: 14_3_3 domain-containing protein	UniProtKB Unreviewed (TrEMBL)	1	Solanum lycopersicum (Tomato)	401	0.9
W1P062	UniRef90_W1P062	Cluster: Ras-related protein RABH1b	UniProtKB Unreviewed (TrEMBL); UniParc	182	Amborella trichopoda; Colocasia esculenta (Wild taro); Cynara cardunculus var. scolymus (Globe artichoke); Genlisea aurea; Ananas comosus (Pineapple); Oryza brachyantha (malo sina); Durio zibethinus (Durian); Cannabis sativa (Hemp); Artemisia annua (Sweet wormwood); Sesamum indicum (Oriental sesame); Theobroma cacao (Cacao); Herrania umbratica; Ensete ventricosum (Abyssinian banana); Musa acumina…	208	0.9
A0A1S3YWY0	UniRef90_A0A1S3YWY0	Cluster: mediator of RNA polymerase II transcription subunit 37a-like	UniProtKB Unreviewed (TrEMBL); UniParc	17	Nicotiana tabacum (Common tobacco); Solanum lycopersicum (Tomato); Solanum chilense (Tomato); Solanum tuberosum (Potato); Solanum chacoense (Chaco potato); Nicotiana sylvestris (Wood tobacco); Nicotiana attenuata (Coyote tobacco); Capsicum annuum (Capsicum pepper); Capsicum chinense (Scotch bonnet); Capsicum baccatum (Peruvian pepper); Solanum pennellii	668	0.9
M1CBH0	UniRef90_M1CBH0	Cluster: Alcohol dehydrogenase 1	UniProtKB Unreviewed (TrEMBL); UniParc	10	Solanum tuberosum (Potato); Capsicum chinense (Scotch bonnet); Capsicum annuum (Capsicum pepper); Solanum chilense (Tomato); Capsicum baccatum (Peruvian pepper); Solanum lycopersicum (Tomato); Solanum pennellii; Solanum verrucosum	379	0.9

## Sheet: F9_GO 0050794
Supplementary Table S2D: List of proteins with gene ontology (GO) term GO:0050794 (Regulation of cellular processes) identified in fraction 9 of density gradient ultracentrifugation separated tomato fruit derived nanovesicles
From	Cluster ID	Cluster Name	Types	Size	Organisms	Length	Identity
UniRef90_Q7Y240	UniRef90_Q7Y240	Cluster: Glutaredoxin-dependent peroxiredoxin	UniProtKB Unreviewed (TrEMBL); UniParc	19	Solanum lycopersicum (Tomato); Solanum chacoense (Chaco potato); Phanerochaete pseudomagnoliae; Nicotiana tabacum (Common tobacco); Capsicum annuum (Capsicum pepper); Solanum chilense (Tomato); Solanum tuberosum (Potato); Nicotiana attenuata (Coyote tobacco); Capsicum baccatum (Peruvian pepper); Nicotiana benthamiana; Capsicum chinense (Scotch bonnet); Nicotiana sylvestris (Wood tobacco); Solanum…	162	0.9
UniRef90_P93207	UniRef90_P93207	Cluster: 14-3-3 protein 10	UniProtKB Reviewed (Swiss-Prot); UniProtKB Unreviewed (TrEMBL); UniParc	15	Solanum lycopersicum (Tomato); Solanum chilense (Tomato); Capsicum chinense (Scotch bonnet); Capsicum baccatum (Peruvian pepper); Capsicum annuum (Capsicum pepper); Petunia hybrida (Petunia); Nicotiana tabacum (Common tobacco); Nicotiana sylvestris (Wood tobacco); Nicotiana attenuata (Coyote tobacco); Solanum nigrum (Black nightshade); Solanum verrucosum; Ipomoea triloba; Ipomoea nil	252	0.9
UniRef90_P49118	UniRef90_P49118	Cluster: Luminal-binding protein	UniProtKB Reviewed (Swiss-Prot); UniProtKB Unreviewed (TrEMBL); UniParc	28	Solanum lycopersicum (Tomato); Nicotiana attenuata (Coyote tobacco); Medicago truncatula (Barrel medic); Trifolium medium; Solanum tuberosum (Potato); Solanum chilense (Tomato); Cicer arietinum (Chickpea); Musa balbisiana (Banana); Musa acuminata subsp. malaccensis (Wild banana); Miscanthus lutarioriparius; Glycine max (Soybean); Impatiens glandulifera; Pisum sativum; Solanum verrucosum; Solanum …	666	0.9
UniRef90_P93206	UniRef90_P93206	Cluster: 14-3-3 protein 1	UniProtKB Reviewed (Swiss-Prot); UniProtKB Unreviewed (TrEMBL); UniParc	18	Solanum lycopersicum (Tomato); Nicotiana tabacum (Common tobacco); Capsicum baccatum (Peruvian pepper); Capsicum chinense (Scotch bonnet); Capsicum annuum (Capsicum pepper); Nicotiana sylvestris (Wood tobacco); Solanum tuberosum (Potato); Solanum chacoense (Chaco potato); Solanum chilense (Tomato); Nicotiana attenuata (Coyote tobacco); Nicotiana tomentosiformis; Solanum stenotomum	249	0.9
UniRef90_P49026	UniRef90_P49026	Cluster: Guanine nucleotide-binding protein subunit beta-like protein	UniProtKB Reviewed (Swiss-Prot); UniProtKB Unreviewed (TrEMBL); UniParc	50	Nicotiana tabacum (Common tobacco); Nicotiana plumbaginifolia (Leadwort-leaved tobacco); Capsicum baccatum (Peruvian pepper); Capsicum chinense (Scotch bonnet); Capsicum annuum (Capsicum pepper); Solanum lycopersicum (Tomato); Solanum chilense (Tomato); Solanum tuberosum (Potato); Nicotiana benthamiana; Nicotiana attenuata (Coyote tobacco); Nicotiana sylvestris (Wood tobacco); Solanum chacoense (…	326	0.9
UniRef90_P25858	UniRef90_P25858	Cluster: Glyceraldehyde-3-phosphate dehydrogenase GAPC1, cytosolic	UniProtKB Reviewed (Swiss-Prot); UniProtKB Unreviewed (TrEMBL); UniParc	254	Arabidopsis thaliana (Mouse-ear cress); Sinapis alba (White mustard); Arabidopsis suecica (Swedish thale-cress); Brassica oleracea (Wild cabbage); Brassica campestris (Field mustard); Brassica napus (Rape); Eruca vesicaria subsp. sativa (Garden rocket); Braya pilosa; Brassica oleracea var. oleracea; Quercus ilex (Holly oak); Castanea mollissima (Chinese chestnut); Carthamus tinctorius (Safflower)…	338	0.9
UniRef90_Q41418	UniRef90_Q41418	Cluster: 14-3-3-like protein	UniProtKB Reviewed (Swiss-Prot); UniProtKB Unreviewed (TrEMBL); UniParc	174	Solanum tuberosum (Potato); Tripterygium wilfordii (Thunder God vine); Juglans regia (English walnut); Carya illinoinensis (Pecan); Castanea mollissima (Chinese chestnut); Quercus lobata (Valley oak); Carpinus fangiana; Fagus sylvatica (Beechnut); Manihot esculenta (Cassava); Hevea brasiliensis (Para rubber tree); Rhodamnia argentea; Jatropha curcas (Barbados nut); Cucumis sativus (Cucumber); Cuc…	259	0.9
UniRef90_A0A3Q7G5G1	UniRef90_A0A3Q7G5G1	Cluster: 14_3_3 domain-containing protein	UniProtKB Unreviewed (TrEMBL); UniParc	8	Solanum lycopersicum (Tomato); Solanum chilense (Tomato); Vanilla planifolia (Vanilla); Trichinella patagoniensis; Apostasia shenzhenica; Gossypium aridum (American cotton); Phalaenopsis equestris	258	0.9
UniRef90_A0A3Q7F894	UniRef90_A0A3Q7F894	Cluster: AAA domain-containing protein	UniProtKB Unreviewed (TrEMBL); UniParc	9	Solanum lycopersicum (Tomato); Solanum chacoense (Chaco potato); Solanum tuberosum (Potato); Solanum chilense (Tomato); Pyrus ussuriensis x Pyrus communis; Olea europaea subsp. europaea; Malus domestica; Pyrus x bretschneideri	458	0.9
UniRef90_A0A3Q7HZY2	UniRef90_A0A3Q7HZY2	Cluster: Senescence-associated protein	UniProtKB Unreviewed (TrEMBL); UniParc	16	Solanum lycopersicum (Tomato); Withania somnifera; Capsicum annuum (Capsicum pepper); Capsicum baccatum (Peruvian pepper); Solanum tuberosum (Potato); Solanum chacoense (Chaco potato); Nicotiana tabacum (Common tobacco); Nicotiana sylvestris (Wood tobacco); Nicotiana attenuata (Coyote tobacco); Solanum chilense (Tomato); Solanum stenotomum; Solanum verrucosum; Solanum pennellii	266	0.9
UniRef90_A0A3Q7GX91	UniRef90_A0A3Q7GX91	Cluster: mitogen-activated protein kinase	UniProtKB Unreviewed (TrEMBL); UniParc	2	Solanum lycopersicum (Tomato)	1275	0.9
UniRef90_A0A3Q7JBH3	UniRef90_A0A3Q7JBH3	Cluster: 14_3_3 domain-containing protein	UniProtKB Unreviewed (TrEMBL)	1	Solanum lycopersicum (Tomato)	401	0.9
UniRef90_A0A1S3YWY0	UniRef90_A0A1S3YWY0	Cluster: mediator of RNA polymerase II transcription subunit 37a-like	UniProtKB Unreviewed (TrEMBL); UniParc	17	Nicotiana tabacum (Common tobacco); Solanum lycopersicum (Tomato); Solanum chilense (Tomato); Solanum tuberosum (Potato); Solanum chacoense (Chaco potato); Nicotiana sylvestris (Wood tobacco); Nicotiana attenuata (Coyote tobacco); Capsicum annuum (Capsicum pepper); Capsicum chinense (Scotch bonnet); Capsicum baccatum (Peruvian pepper); Solanum pennellii	668	0.9
UniRef90_M1CBH0	UniRef90_M1CBH0	Cluster: Alcohol dehydrogenase 1	UniProtKB Unreviewed (TrEMBL); UniParc	10	Solanum tuberosum (Potato); Capsicum chinense (Scotch bonnet); Capsicum annuum (Capsicum pepper); Solanum chilense (Tomato); Capsicum baccatum (Peruvian pepper); Solanum lycopersicum (Tomato); Solanum pennellii; Solanum verrucosum	379	0.9
UniRef90_P93210	UniRef90_P93210	Cluster: 14-3-3 protein 5	UniProtKB Reviewed (Swiss-Prot); UniProtKB Unreviewed (TrEMBL); UniParc	18	Solanum lycopersicum (Tomato); Nicotiana tabacum (Common tobacco); Solanum tuberosum (Potato); Capsicum baccatum (Peruvian pepper); Solanum chacoense (Chaco potato); Solanum chilense (Tomato); Nicotiana sylvestris (Wood tobacco); Nicotiana attenuata (Coyote tobacco); Solanum pennellii	255	0.9
UniRef90_A0A1U8H482	UniRef90_A0A1U8H482	Cluster: alcohol dehydrogenase 1	UniProtKB Unreviewed (TrEMBL)	12	Capsicum annuum (Capsicum pepper); Solanum lycopersicum (Tomato); Solanum pimpinellifolium (Currant tomato); Solanum lycopersicum var. cerasiforme; Solanum pennellii (Tomato); Solanum peruvianum (Peruvian tomato); Solanum cheesmaniae (Galapagos Island tomato); Capsicum chinense (Scotch bonnet); Nicotiana attenuata (Coyote tobacco); Nicotiana tabacum (Common tobacco)	380	0.9
UniRef90_A0A3Q7GTI1	UniRef90_A0A3Q7GTI1	Cluster: Luminal-binding protein 5	UniProtKB Unreviewed (TrEMBL); UniParc	2	Solanum lycopersicum (Tomato); Solanum pennellii	552	0.9
UniRef90_Q9FSY7	UniRef90_Q9FSY7	Cluster: Endoplasmic reticulum chaperone BiP	UniProtKB Reviewed (Swiss-Prot); UniProtKB Unreviewed (TrEMBL); UniParc	264	Corylus avellana (European hazel); Nicotiana tabacum (Common tobacco); Salix brachista; Salix viminalis (Common osier); Gossypium barbadense (Sea-island cotton); Gossypium australe; Gossypium armourianum; Gossypium schwendimanii (Cotton); Eutrema salsugineum (Saltwater cress); Eutrema halophilum (Salt cress); Cuscuta campestris; Raphanus sativus (Radish); Brassica oleracea var. oleracea; Brassica…	668	0.9
UniRef90_P93209	UniRef90_P93209	Cluster: 14-3-3 protein 3	UniProtKB Reviewed (Swiss-Prot); UniProtKB Unreviewed (TrEMBL); UniParc	22	Solanum lycopersicum (Tomato); Nicotiana tabacum (Common tobacco); Solanum chilense (Tomato); Nicotiana attenuata (Coyote tobacco); Nicotiana sylvestris (Wood tobacco); Solanum tuberosum (Potato); Solanum chacoense (Chaco potato); Capsicum baccatum (Peruvian pepper); Capsicum chinense (Scotch bonnet); Capsicum annuum (Capsicum pepper); Kribbella monticola; Solanum stenotomum	260	0.9
